# Supplementary material for: Genome-Wide Analysis Identified a Set of Conserved lncRNAs Associated with Domestication-Related Traits in Rice
Source: MDPI journal article supplement (doi:10.3390/ijms22094742), 2021-04-29
Supplement: s1 [file s1]

# Supplementary figures and legends

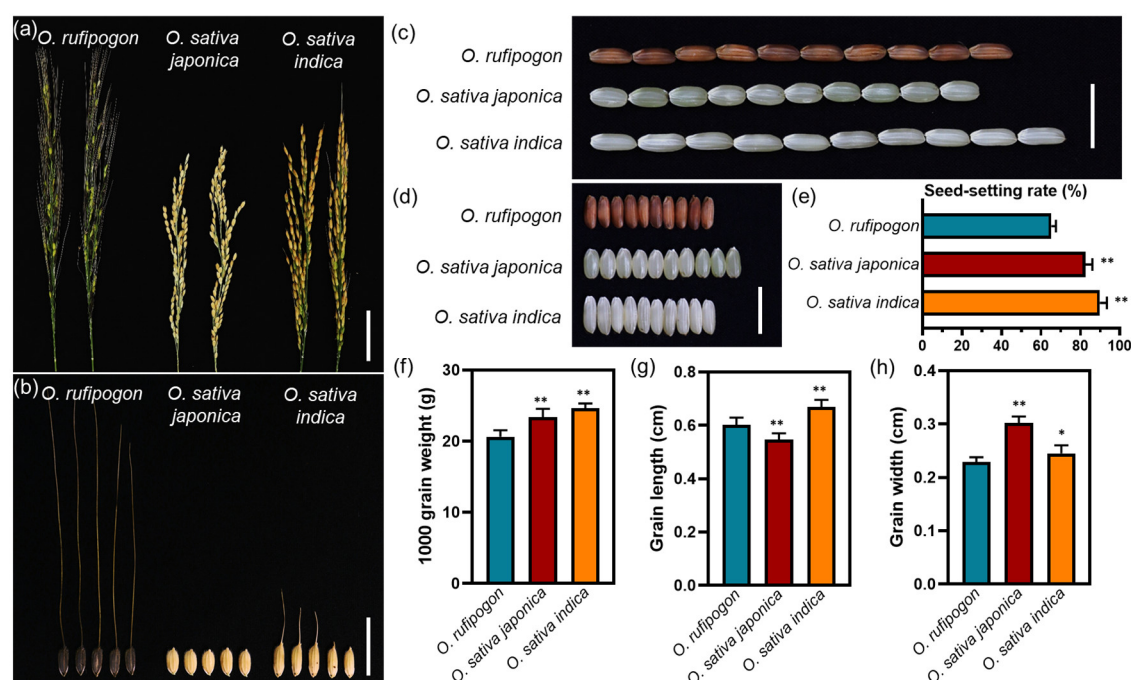

**Supplementary Fig. S1.** Phenotypic comparisons between wild rice and two cultivated rice varieties. The common wild rice (*Oryza rufipogon*, collected from Hainan province), Nipponbare (*O. sativa* ssp. *japonica*) and 93-11 (*O. sativa* ssp. *indica*) was used in this study. **(a)** Panicle architecture. The scale bar is 5 cm. **(b)** Grain morphology. The scale bar is 2 cm. **(c-d)** Grain length (c) and width (d). The scale bar is 1 cm. **(e-h)** Data analysis of seed-setting rate (e), 1000-grain weight (f), grain length (g) and grain width (h). Data are presented as means  $\pm$  SD. Asterisks indicate statistically significant differences compared with the *Oryza rufipogon*, as determined using Student's *t* test (\* $P < 0.05$ ; \*\* $P < 0.01$ ;  $n = 30$ ).

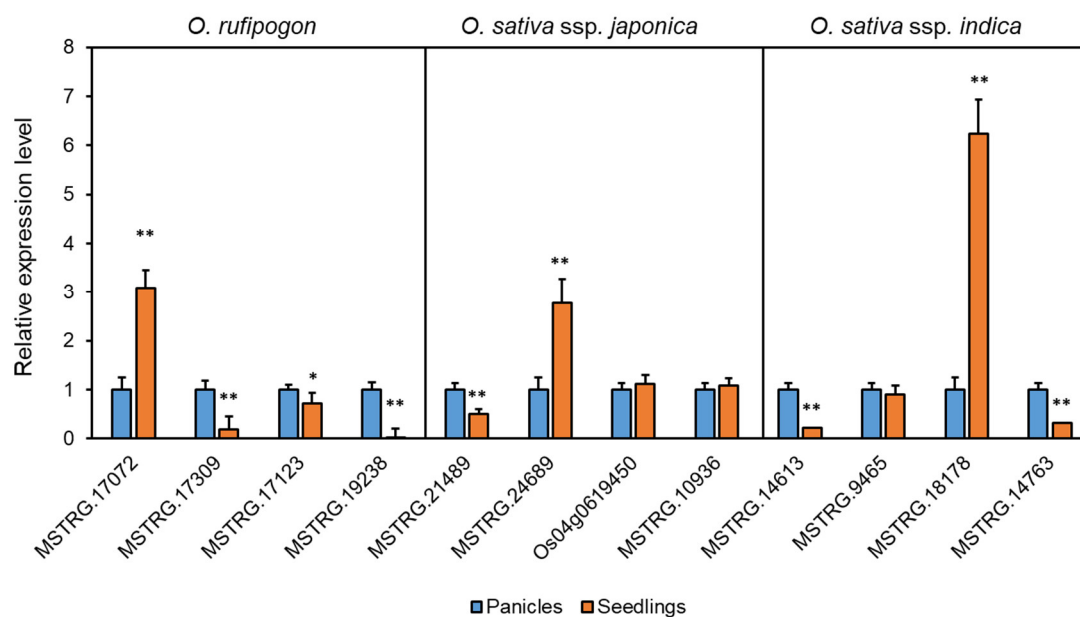

**Supplementary Fig. S2.** Validation of lncRNA expression profiles in RNA-seq by quantitative real-time PCR. Rice gene *Actin 2* was used as an endogenous control. Expression levels of panicles were set to 1. The data are expressed as the mean  $\pm$  SD of three replicates. Asterisks indicate statistically significant differences compared with wild rice by Student's *t* test (\* $p < 0.05$ , \*\* $p < 0.01$ ).

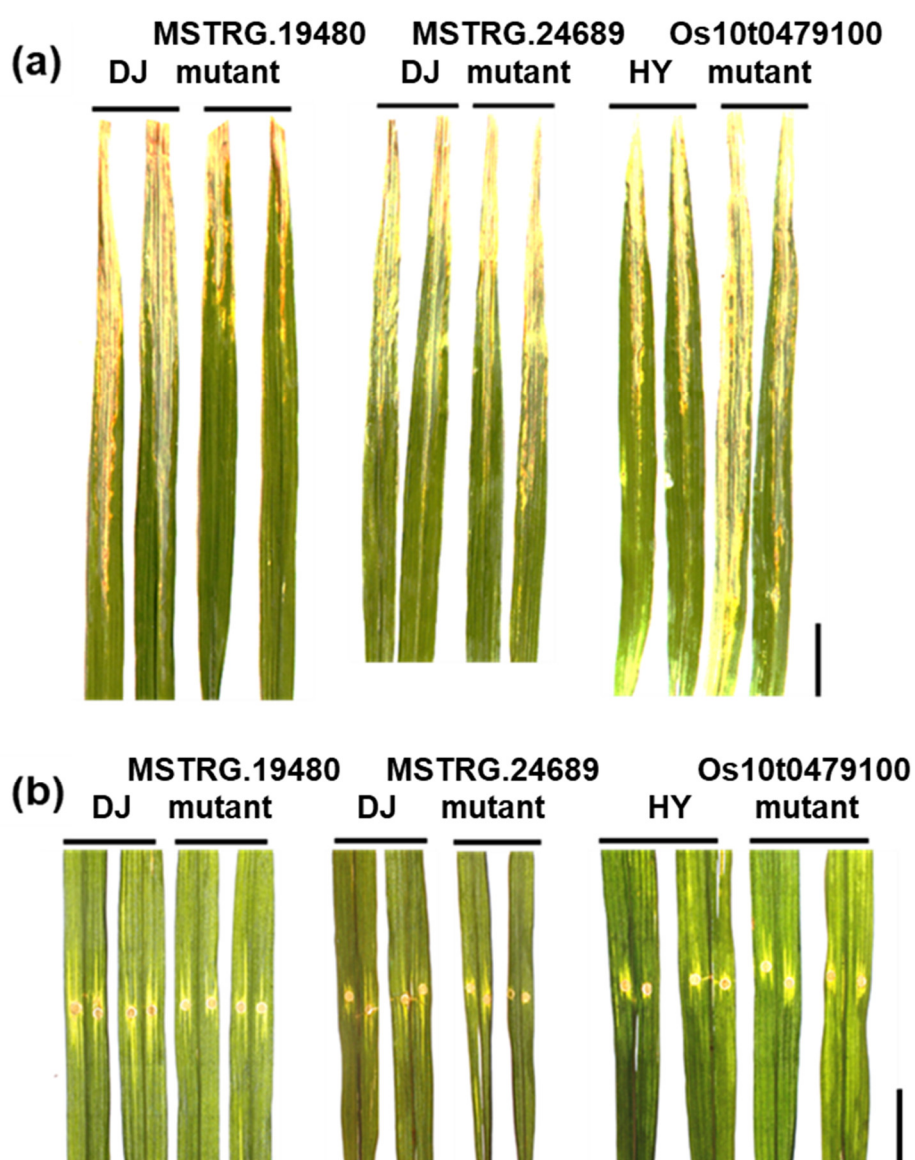

**Supplementary Fig. S3.** Comparison of resistance to *Xoo* (a) and *Xoc* (b) between wild type and T-DNA insertion mutants of three conserved lncRNAs in rice domestication. Scale bar =5 cm.

|                  |                                                                                     |      |
|------------------|-------------------------------------------------------------------------------------|------|
| OR-MSTRG.27043.1 | .....AGAAAAGATTCCCCTCCTCTGCTTCTCGTGTCTCTTCTTCCCTCCCGTCTCTACTCCTATTCTATCGGATCTCCGGC  | 77   |
| OJ-MSTRG.19480.1 | AAAAAGAAAAGATTCCCCTCCTCTGCTTCTCGTGTCTCTTCTTCCCTCCCGTCTCTACTCCTATTCTATCGGATCTCCGGC   | 82   |
| OR-MSTRG.27043.1 | GAGCAGCGCCGCGCGCATCGGGGTGTAACATGGCCTTGTGCGCGGAGCCCATGTTACGGCGGCGCGCGCGCGGAGCGC      | 159  |
| OJ-MSTRG.19480.1 | GAGCAGCGCCGCGCGCATCGGGGTGTAACATGGCCTTGTGCGCGGAGCCCATGTTACGGCGGCGCGCGCGCGGAGCGC      | 164  |
| OR-MSTRG.27043.1 | GAGGAAGCCCTAGACGCGCGGATGTGTGGGGTTTGGGTGAGCGCAATTACCATGGGTTTTTTTTCTCTTTTTCTTGGC      | 241  |
| OJ-MSTRG.19480.1 | GAGGAAGCCCTAGACGCGCGGATGTGTGGGGTTTGGGTGAGCGCAATTACCATGGGTTTTTTTTCTCTTTTTCTTGGC      | 246  |
| OR-MSTRG.27043.1 | TTTGTATTATGTAGATTAGCCTTTTCATGCCATTTTCAAATTTGAAACAAATCATAGCGTTGGAATATAAAGTGAATTGTCT  | 323  |
| OJ-MSTRG.19480.1 | TTTGTATTATGTAGATTAGCCTTTTCATGCCATTTTCAAATTTGAAACAAATCATAGCGTTGGAATATAAAGTGAATTGTCT  | 328  |
| OR-MSTRG.27043.1 | GTATTTCTCCATCAACTTAAGCTTTTGGGTTGAACTGATCAGTGCATGTAACCTCAATAGATAGTACTCCTATGTTATTGTGT | 405  |
| OJ-MSTRG.19480.1 | GTATTTCTCCATCAACTTAAGCTTTTGGGTTGAACTGATCAGTGCATGTAACCTCAATAGATAGTACTCCTATGTTATTGTGT | 410  |
| OR-MSTRG.27043.1 | GATAAGGAAATGTATAAAGAGGAGGAGATAGAGTTGGTTGAAACAAATATCAAATTTATTTCAACAAGCTACCTTTGTA     | 487  |
| OJ-MSTRG.19480.1 | GATAAGGAAATGTATAAAGAGGAGGAGATAGAGTTGGTTGAAACAAATATCAAATTTATTTCAACAAGCTACCTTTGTA     | 492  |
| OR-MSTRG.27043.1 | TTACACATAAAAACTCTCACACATGTGTATGATTCAACTTTGCATTTATGTATTGAACACTAACTTATATGAGTAAGATC    | 569  |
| OJ-MSTRG.19480.1 | TTACACATAAAAACTCTCACACATGTGTATGATTCAACTTTGCATTTATGTATTGAACACTAACTTATATGAGTAAGATC    | 574  |
| OR-MSTRG.27043.1 | TCGTCAACAACAGCATTTTTACCAGGTGCTCGCCTATTAGTAGAGCTCATCAACCTCAGTAAATAAGTAACAAAATGTAC    | 651  |
| OJ-MSTRG.19480.1 | TCGTCAACAACAGCATTTTTACCAGGTGCTCGCCTATTAGTAGAGCTCATCAACCTCAGTAAATAAGTAACAAAATGTAC    | 656  |
| OR-MSTRG.27043.1 | TTAGTTATAGAAAATACGATGTACTGCTTTCTTAGTAGCAGCAACGGTACTAAAACATCTGGTAGACTAGATCTTGAAGTAA  | 733  |
| OJ-MSTRG.19480.1 | TTAGTTATAGAAAATACGATGTACTGCTTTCTTAGTAGCAGCAACGGTACTAAAACATCTGGTAGACTAGATCTTGAAGTAA  | 738  |
| OR-MSTRG.27043.1 | ATCCGATCGTTTGTTCAACTAACTACATCTCTTCCCATGCAAAAGTATCTCAAGTACGAAATAACATCGCTCGATCATGT    | 815  |
| OJ-MSTRG.19480.1 | ATCCGATCGTTTGTTCAACTAACTACATCTCTTCCCATGCAAAAGTATCTCAAGTACGAAATAACATCGCTCGATCATGT    | 820  |
| OR-MSTRG.27043.1 | GAAAAAATATAGATACCTTGAACCTTCGCATCACAATAGTTAAAAAATCAACCACATTAGTTGTACCTTTGGAATTC       | 897  |
| OJ-MSTRG.19480.1 | GAAAAAATATAGATACCTTGAACCTTCGCATCACAATAGTTAAAAAATCAACCACATTAGTTGTACCTTTGGAATTC       | 902  |
| OR-MSTRG.27043.1 | TCGTGAACACTTTTGCCATCACCTATTGGCATACTATGTATATATTGTTTTACATTTTAAGTATTGATGGTCTCACCAT     | 979  |
| OJ-MSTRG.19480.1 | TCGTGAACACTTTTGCCATCACCTATTGGCATACTATGTATATATTGTTTTACATTTTAAGTATTGATGGTCTCACCAT     | 984  |
| OR-MSTRG.27043.1 | GCGCACCACAGCAAACTAAGCAAACTCATCGATATAAGGTGGAGTCACCTTCATCCTATGATTGAAACGCTACTACTGAT    | 1061 |
| OJ-MSTRG.19480.1 | GCGCACCACAGCAAACTAAGCAAACTCATCGATATAAGGTGGAGTCACCTTCATCCTATGATTGAAACGCTACTACTGAT    | 1066 |
| OR-MSTRG.27043.1 | ACCCTTTAGGATCACAATTGATTATTTACCATCCATATTTATGTCCCGTGGCATATAGATGGCTAGGCCTAGGATATGAT    | 1143 |
| OJ-MSTRG.19480.1 | ACCCTTTAGGATCACAATTGATTATTTACCATCCATATTTATGTCCCGTGGCATATAGATGGCTAGGCCTAGGATATGAT    | 1148 |
| OR-MSTRG.27043.1 | CAATTTCTCGTGGGAGGCAAGAGCCATATTGGTAATATAAGTG.....                                    | 1187 |
| OJ-MSTRG.19480.1 | CAATTTCTCGTGGGAGGCAAGAGCCATATTGGTAATATAAGTGCCATCGTATTGGGCAAGACATTAAAGTTGGGTTAACTT   | 1230 |
| OR-MSTRG.27043.1 | .....                                                                               | 1187 |
| OJ-MSTRG.19480.1 | CAACCTCAACTTAAAAGGAGTCAAGCTCATCTCTCCC                                               | 1267 |

**Supplementary Fig. S4.** Sequence alignment of MSTRG.19480 in *japonica* rice and MSTRG.27043 in *O. rufipogon*.
