# Supplementary material for: Genome-Wide Analysis Identified a Set of Conserved lncRNAs Associated with Domestication-Related Traits in Rice
Source: Int J Mol Sci. 2021 Apr 29;22(9):4742. doi: 10.3390/ijms22094742 (PMC8124408; doi:10.3390/ijms22094742)
Supplement: Supplementary file 1 [file ijms-22-04742-s001.zip › Supplementary tables.xlsx]

## Sheet: Table S1
Table S1. Genomic loci and expression pattern of lncRNAs identified from Oryza rufipogon.
LncRNA_Gene_ID	LncRNA_ID	Chromosome	Strand	Start	End	Length	Exon_number	Status	Gene_Type	Panicle expression	Seedlings expression	log2(fold change)	FDR	Differentially expressed
MSTRG.2	MSTRG.2.1	1	+	3239	4368	1130	1	Novel_lncRNA	Others(anti down)	19.35	2.94	-2.71845	1.21018e-77	yes
MSTRG.10	MSTRG.10.1	1	-	41491	41691	201	1	Novel_lncRNA	Antisense LncRNAs	0.54	0	-9.07682	0.537283
MSTRG.18	MSTRG.18.1	1	-	124489	124697	209	1	Novel_lncRNA	Intronic LncRNAs	7.79	0	-12.9274	7.792e-10	yes
MSTRG.21	MSTRG.21.2	1	+	144051	150671	1950	3	Novel_lncRNA	Antisense LncRNAs	5.96	0.95	-2.64931	2.61884e-41	yes
MSTRG.81	MSTRG.81.1	1	-	581884	582568	685	1	Novel_lncRNA	Antisense LncRNAs	0.87	0.17	-2.35548	0.0108176	yes
MSTRG.94	MSTRG.94.1	1	-	664824	668514	811	3	Novel_lncRNA	Antisense LncRNAs	1.41	1.26	-0.162271	0.709111
MSTRG.103	MSTRG.103.1	1	-	717216	717434	219	1	Novel_lncRNA	Antisense LncRNAs	0.5	0.17	-1.55639	1
MSTRG.104	MSTRG.104.1	1	-	724578	725216	223	2	Novel_lncRNA	Bidirectional LncRNAs	0.97	0	-9.92184	0.07712
MSTRG.108	MSTRG.108.1	1	+	773799	774042	244	1	Novel_lncRNA	Others(sense updown)	0.89	0	-9.79766	0.07712
MSTRG.111	MSTRG.111.1	1	+	793287	793533	247	1	Novel_lncRNA	Others(anti down)	1.54	0	-10.5887	0.0111518	yes
MSTRG.136	MSTRG.136.1	1	+	1098236	1099987	1752	1	Novel_lncRNA	Others(anti down)	3.96	0.69	-2.52083	2.17833e-23	yes
MSTRG.143	MSTRG.143.1	1	-	1139829	1140097	269	1	Novel_lncRNA	Bidirectional LncRNAs	1.01	0	-9.98014	0.0406196	yes
MSTRG.147	MSTRG.147.6	1	-	1252261	1254884	1455	4	Novel_lncRNA	Sense LncRNAs	2.73	0	-11.4147	3.20677e-24	yes
MSTRG.161	MSTRG.161.1	1	-	1349700	1350062	363	1	Novel_lncRNA	Others(sense updown)	5.83	0.66	-3.14296	2.69459e-09	yes
MSTRG.193	MSTRG.193.1	1	-	1706648	1707329	682	1	Novel_lncRNA	Antisense LncRNAs	1.43	0	-10.4818	2.23847e-06	yes
MSTRG.213	MSTRG.213.1	1	+	1843562	1843897	336	1	Novel_lncRNA	Intronic LncRNAs	13.89	0.23	-5.91627	6.10978e-29	yes
MSTRG.238	MSTRG.238.1	1	-	2069455	2072481	3027	1	Novel_lncRNA	Others(anti down)	4.12	0.02	-7.6865	2.02858e-76	yes
MSTRG.249	MSTRG.249.1	1	+	2159589	2160021	433	1	Novel_lncRNA	Intergenic LncRNAs	1.75	0.17	-3.36375	0.000469508	yes
MSTRG.256	MSTRG.256.1	1	+	2204378	2204820	443	1	Novel_lncRNA	Intergenic LncRNAs	244.27	33.45	-2.8684	0	yes
MSTRG.257	MSTRG.257.1	1	-	2204380	2204815	436	1	Novel_lncRNA	Intergenic LncRNAs	0.87	0.09	-3.27302	0.0501844
MSTRG.265	MSTRG.265.1	1	+	2274228	2274570	343	1	Novel_lncRNA	Bidirectional LncRNAs	0.32	0.22	-0.540568	1
MSTRG.294	MSTRG.294.1	1	-	2483203	2483415	213	1	Novel_lncRNA	Intronic LncRNAs	5.86	0	-12.5167	1.62126e-07	yes
MSTRG.320	MSTRG.320.1	1	-	2651919	2652220	302	1	Novel_lncRNA	Intergenic LncRNAs	3.8	0	-11.8918	6.10507e-07	yes
MSTRG.338	MSTRG.338.1	1	-	2786197	2786418	222	1	Novel_lncRNA	Others(sense updown)	0.98	0.17	-2.52725	0.25698
MSTRG.352	MSTRG.352.1	1	+	3024932	3025808	877	1	Novel_lncRNA	Others(anti down)	1.36	0.39	-1.80206	0.00212832	yes
MSTRG.358	MSTRG.358.1	1	+	3053925	3054531	607	1	Novel_lncRNA	Others(sense updown)	1.16	0	-10.1799	0.000115018	yes
MSTRG.381	MSTRG.381.1	1	+	3257560	3257827	268	1	Novel_lncRNA	Others(sense updown)	2.02	0	-10.9801	0.00157708	yes
MSTRG.384	MSTRG.384.1	1	-	3286881	3291099	3923	4	Novel_lncRNA	Sense LncRNAs	8.26	0.02	-8.69	2.25337e-196	yes
MSTRG.404	MSTRG.404.1	1	-	3403591	3403853	263	1	Novel_lncRNA	Intergenic LncRNAs	1.86	0	-10.8611	0.00302028	yes
MSTRG.405	MSTRG.405.1	1	-	3404844	3405076	233	1	Novel_lncRNA	Intergenic LncRNAs	0.93	0	-9.86109	0.07712
MSTRG.406	MSTRG.406.1	1	-	3407489	3407711	223	1	Novel_lncRNA	Intergenic LncRNAs	4.38	0	-12.0967	2.23847e-06	yes
MSTRG.408	MSTRG.408.1	1	+	3430632	3430867	236	1	Novel_lncRNA	Intergenic LncRNAs	2.2	0	-11.1033	0.00157708	yes
MSTRG.428	MSTRG.428.1	1	-	3598475	3599136	662	1	Novel_lncRNA	Intergenic LncRNAs	1.07	0	-10.0634	0.000115018	yes
MSTRG.435	MSTRG.435.1	1	+	3688557	3688866	310	1	Novel_lncRNA	Intronic LncRNAs	1.23	0.24	-2.35755	0.0501844
MSTRG.438	MSTRG.438.1	1	-	3698777	3699856	646	2	Novel_lncRNA	Antisense LncRNAs	1.01	1.99	0.978413	0.0815505
MSTRG.462	MSTRG.462.1	1	-	3904787	3906967	657	2	Novel_lncRNA	Sense LncRNAs	1.73	2.36	0.448015	0.413867
MSTRG.469	MSTRG.469.5	1	-	4002240	4005165	2882	2	Novel_lncRNA	Intergenic LncRNAs	2.98	0	-11.5411	2.92719e-52	yes
MSTRG.478	MSTRG.478.2	1	-	4093527	4102428	1275	5	Novel_lncRNA	Others(lnc(mRNA))	6.96	0.37	-4.23349	9.32643e-48	yes
MSTRG.480	MSTRG.480.2	1	-	4099854	4102830	406	3	Novel_lncRNA	Sense LncRNAs	0	2.78	11.4409	1.95625e-06	yes
MSTRG.508	MSTRG.508.1	1	-	4374660	4380926	1909	10	Novel_lncRNA	Sense LncRNAs	29.39	1.36	-4.43365	2.9324e-302	yes
MSTRG.509	MSTRG.509.2	1	+	4393652	4400086	3221	10	Novel_lncRNA	Sense LncRNAs	3.37	0.05	-6.07468	1.01937e-66	yes
MSTRG.514	MSTRG.514.1	1	+	4434093	4435259	1167	1	Novel_lncRNA	Intergenic LncRNAs	1.53	0.06	-4.67243	4.98345e-10	yes
MSTRG.528	MSTRG.528.1	1	+	4586325	4586723	399	1	Novel_lncRNA	Antisense LncRNAs	3.94	0	-11.944	1.51832e-09	yes
MSTRG.539	MSTRG.539.1	1	-	4682602	4689269	2247	2	Novel_lncRNA	Others(anti down)	1.98	0.02	-6.62936	3.61231e-27	yes
MSTRG.540	MSTRG.540.1	1	+	4689493	4689914	348	2	Novel_lncRNA	Others(anti down)	5.93	0	-12.5338	9.53511e-13	yes
MSTRG.546	MSTRG.546.1	1	-	4742763	4743816	317	2	Novel_lncRNA	Antisense LncRNAs	2.23	0.12	-4.21594	0.000115018	yes
MSTRG.547	MSTRG.547.1	1	+	4744477	4744930	419	2	Novel_lncRNA	Others(sense updown)	5.81	0.18	-5.01247	2.2179e-15	yes
MSTRG.548	MSTRG.548.1	1	-	4744516	4744809	294	1	Novel_lncRNA	Others(anti down)	1.51	0	-10.5603	0.00579257	yes
MSTRG.549	MSTRG.549.1	1	-	4749244	4749492	249	1	Novel_lncRNA	Intergenic LncRNAs	1.74	2.28	0.389947	0.878624
MSTRG.590	MSTRG.590.3	1	-	5283197	5284827	1463	3	Novel_lncRNA	Antisense LncRNAs	4.9	0.21	-4.54432	1.83871e-41	yes
MSTRG.593	MSTRG.593.1	1	+	5292213	5292446	234	1	Novel_lncRNA	Antisense LncRNAs	3.01	0.32	-3.23362	0.000867787	yes
MSTRG.594	MSTRG.594.1	1	+	5304574	5304796	223	1	Novel_lncRNA	Others(anti down)	1.66	0	-10.697	0.0111518	yes
MSTRG.613	MSTRG.613.1	1	+	5435243	5435510	268	1	Novel_lncRNA	Others(anti down)	0.2	0	-7.64386	1
MSTRG.694	MSTRG.694.1	1	+	6324533	6325367	835	1	Novel_lncRNA	Others(anti down)	1.04	0.81	-0.36059	0.537283
MSTRG.752	MSTRG.752.1	1	+	6861252	6861519	268	1	Novel_lncRNA	Antisense LncRNAs	4.25	0.42	-3.339	2.22797e-05	yes
MSTRG.776	MSTRG.776.1	1	-	7061642	7062039	330	2	Novel_lncRNA	Intergenic LncRNAs	1.58	0	-10.6257	0.00157708	yes
MSTRG.777	MSTRG.777.1	1	-	7068290	7068491	202	1	Novel_lncRNA	Bidirectional LncRNAs	1.04	0	-10.0224	0.14915
MSTRG.785	MSTRG.785.1	1	-	7149623	7150261	639	1	Novel_lncRNA	Intergenic LncRNAs	0.85	0.06	-3.82443	0.000820714	yes
MSTRG.787	MSTRG.787.1	1	+	7154429	7155212	784	1	Novel_lncRNA	Bidirectional LncRNAs	0.62	0	-9.27612	0.00302028	yes
MSTRG.791	MSTRG.791.2	1	-	7172730	7174403	575	3	Novel_lncRNA	Antisense LncRNAs	3.31	1.03	-1.68419	0.000154898	yes
MSTRG.804	MSTRG.804.1	1	+	7347248	7347597	350	1	Novel_lncRNA	Intergenic LncRNAs	0.93	0.11	-3.07973	0.0860559
MSTRG.816	MSTRG.816.1	1	+	7430116	7430763	475	2	Novel_lncRNA	Antisense LncRNAs	3.77	0.16	-4.55842	4.98345e-10	yes
MSTRG.818	MSTRG.818.1	1	-	7458192	7458402	211	1	Novel_lncRNA	Others(sense updown)	0.26	0	-8.02237	1
MSTRG.835	MSTRG.835.1	1	-	7663920	7664974	1055	1	Novel_lncRNA	Intergenic LncRNAs	6.11	1.17	-2.38466	8.02942e-21	yes
MSTRG.850	MSTRG.850.1	1	-	7778464	7779037	493	2	Novel_lncRNA	Antisense LncRNAs	2.42	1.69	-0.517984	0.330361
MSTRG.859	MSTRG.859.1	1	-	7840150	7840654	505	1	Novel_lncRNA	Intergenic LncRNAs	1.07	0.37	-1.53201	0.0939404
MSTRG.863	MSTRG.863.1	1	-	7885996	7888544	634	2	Novel_lncRNA	Sense LncRNAs	7.48	21.17	1.50091	4.39221e-18	yes
MSTRG.874	MSTRG.874.1	1	-	7953202	7953412	211	1	Novel_lncRNA	Intergenic LncRNAs	0.48	0.28	-0.777608	1
MSTRG.886	MSTRG.886.1	1	+	8078065	8079450	707	3	Novel_lncRNA	Sense LncRNAs	5.88	4.65	-0.338585	0.104658
MSTRG.891	MSTRG.891.1	1	+	8119947	8120273	327	1	Novel_lncRNA	Bidirectional LncRNAs	0.5	0	-8.96578	0.284393
MSTRG.896	MSTRG.896.1	1	+	8141913	8144964	3016	2	Novel_lncRNA	Bidirectional LncRNAs	2.56	0.93	-1.46084	2.8941e-13	yes
MSTRG.920	MSTRG.920.1	1	+	8338644	8338937	294	1	Novel_lncRNA	Others(sense updown)	2.03	0.39	-2.37993	0.0108176	yes
MSTRG.935	MSTRG.935.1	1	+	8465127	8470781	1104	5	Novel_lncRNA	Sense LncRNAs	6.76	1.04	-2.70044	3.08003e-27	yes
MSTRG.937	MSTRG.937.1	1	-	8476683	8477678	996	1	Novel_lncRNA	Intergenic LncRNAs	1.04	0.42	-1.30812	0.0221669	yes
MSTRG.943	MSTRG.943.4	1	+	8511975	8516192	1720	8	Novel_lncRNA	Sense LncRNAs	14.73	0.43	-5.09828	4.31744e-155	yes
MSTRG.943	MSTRG.943.3	1	+	8511975	8516192	3645	5	Novel_lncRNA	Sense LncRNAs	26.71	0.8	-5.06124	0	yes
MSTRG.977	MSTRG.977.1	1	+	8814825	8825477	1179	6	Novel_lncRNA	Antisense LncRNAs	3.18	0.96	-1.72792	1.30237e-08	yes
MSTRG.979	MSTRG.979.1	1	+	8816978	8818207	1067	2	Novel_lncRNA	Intronic LncRNAs	2.44	0.21	-3.53842	9.67042e-13	yes
MSTRG.991	MSTRG.991.1	1	-	9005372	9008024	1186	3	Novel_lncRNA	Intergenic LncRNAs	0.73	0.22	-1.73039	0.00973996	yes
MSTRG.998	MSTRG.998.1	1	-	9032651	9032906	256	1	Novel_lncRNA	Antisense LncRNAs	1.7	0	-10.7313	0.00579257	yes
MSTRG.1005	MSTRG.1005.1	1	-	9080826	9081076	251	1	Novel_lncRNA	Intergenic LncRNAs	0.86	0.45	-0.934412	0.507418
MSTRG.1013	MSTRG.1013.1	1	-	9161895	9162233	339	1	Novel_lncRNA	Antisense LncRNAs	1.6	0.22	-2.8625	0.00521537	yes
MSTRG.1016	MSTRG.1016.1	1	-	9190105	9190382	278	1	Novel_lncRNA	Intergenic LncRNAs	4.58	0.14	-5.03185	4.27987e-08	yes
MSTRG.1017	MSTRG.1017.1	1	+	9190132	9190379	248	1	Novel_lncRNA	Intergenic LncRNAs	0.72	0	-9.49185	0.14915
MSTRG.1018	MSTRG.1018.1	1	+	9196984	9197468	304	2	Novel_lncRNA	Intergenic LncRNAs	4.46	0	-12.1228	2.19753e-08	yes
MSTRG.1033	MSTRG.1033.1	1	+	9321518	9321922	405	1	Novel_lncRNA	Bidirectional LncRNAs	1.21	0	-10.2408	0.00302028	yes
MSTRG.1034	MSTRG.1034.1	1	+	9322425	9322887	463	1	Novel_lncRNA	Intergenic LncRNAs	42.78	0.08	-9.06272	1.2691e-120	yes
MSTRG.1035	MSTRG.1035.1	1	+	9325414	9325622	209	1	Novel_lncRNA	Intergenic LncRNAs	27.78	0	-14.7618	1.95453e-35	yes
MSTRG.1036	MSTRG.1036.1	1	-	9347972	9348249	278	1	Novel_lncRNA	Intergenic LncRNAs	1.56	0	-10.6073	0.00579257	yes
MSTRG.1042	MSTRG.1042.1	1	-	9422747	9423012	266	1	Novel_lncRNA	Intergenic LncRNAs	1.33	0	-10.3772	0.0214131	yes
MSTRG.1062	MSTRG.1062.1	1	-	9708188	9708421	234	1	Novel_lncRNA	Intergenic LncRNAs	0.7	0	-9.45121	0.284393
MSTRG.1063	MSTRG.1063.1	1	+	9712763	9713348	586	1	Novel_lncRNA	Others(anti down)	0.46	7.81	4.08562	9.11753e-20	yes
MSTRG.1077	MSTRG.1077.1	1	+	9978166	9978368	203	1	Novel_lncRNA	Intergenic LncRNAs	0.8	0	-9.64386	0.284393
MSTRG.1085	MSTRG.1085.1	1	-	10060314	10060524	211	1	Novel_lncRNA	Intergenic LncRNAs	0.26	0	-8.02237	1
MSTRG.1089	MSTRG.1089.4	1	-	10150737	10153347	972	6	Novel_lncRNA	Sense LncRNAs	5.81	0.43	-3.75613	1.20388e-28	yes
MSTRG.1089	MSTRG.1089.3	1	-	10150737	10153347	555	5	Novel_lncRNA	Sense LncRNAs	17.88	0.68	-4.71667	2.80142e-58	yes
MSTRG.1089	MSTRG.1089.7	1	-	10154094	10154975	406	3	Novel_lncRNA	Sense LncRNAs	8.64	0.19	-5.50696	7.30172e-22	yes
MSTRG.1089	MSTRG.1089.6	1	-	10154094	10154975	406	3	Novel_lncRNA	Sense LncRNAs	9.94	0.19	-5.70917	8.24219e-25	yes
MSTRG.1101	MSTRG.1101.1	1	+	10283592	10286181	2590	1	Novel_lncRNA	Antisense LncRNAs	1.57	0.23	-2.77106	9.90996e-16	yes
MSTRG.1108	MSTRG.1108.1	1	+	10326899	10327560	536	2	Novel_lncRNA	Intergenic LncRNAs	0.91	19.54	4.42442	3.05308e-47	yes
MSTRG.1113	MSTRG.1113.1	1	+	10403218	10403511	294	1	Novel_lncRNA	Antisense LncRNAs	0.18	3.73	4.37311	1.25027e-05	yes
MSTRG.1116	MSTRG.1116.1	1	-	10408212	10408561	350	1	Novel_lncRNA	Antisense LncRNAs	1.24	0.11	-3.49476	0.0290932	yes
MSTRG.1129	MSTRG.1129.1	1	+	10534538	10534781	244	1	Novel_lncRNA	Intergenic LncRNAs	0.65	0.15	-2.11548	0.66687
MSTRG.1139	MSTRG.1139.1	1	+	10734542	10734889	348	1	Novel_lncRNA	Antisense LncRNAs	4.05	0	-11.9837	1.12178e-08	yes
MSTRG.1141	MSTRG.1141.1	1	+	10764563	10765067	505	1	Novel_lncRNA	Antisense LncRNAs	1.72	0.37	-2.21681	0.00400671	yes
MSTRG.1148	MSTRG.1148.3	1	+	10837044	10840510	2238	6	Novel_lncRNA	Sense LncRNAs	10.03	1.51	-2.7317	7.04922e-80	yes
MSTRG.1150	MSTRG.1150.1	1	+	10857440	10857951	473	2	Novel_lncRNA	Others(sense updown)	1.15	0	-10.1674	0.00157708	yes
MSTRG.1163	MSTRG.1163.1	1	+	11069629	11069975	347	1	Novel_lncRNA	Bidirectional LncRNAs	1.72	0.33	-2.38187	0.0108176	yes
MSTRG.1168	MSTRG.1168.1	1	+	11129961	11130814	494	2	Novel_lncRNA	Intergenic LncRNAs	938.63	71.48	-3.71495	0	yes
MSTRG.1169	MSTRG.1169.1	1	-	11130101	11130814	354	2	Novel_lncRNA	Intergenic LncRNAs	1.99	0	-10.9586	0.000115018	yes
MSTRG.1171	MSTRG.1171.1	1	-	11141876	11142164	289	1	Novel_lncRNA	Intergenic LncRNAs	3.19	0	-11.6393	4.31054e-06	yes
MSTRG.1172	MSTRG.1172.1	1	-	11177525	11178215	691	1	Novel_lncRNA	Intergenic LncRNAs	0.94	0	-9.87652	0.000219491	yes
MSTRG.1185	MSTRG.1185.1	1	+	11386732	11387668	937	1	Novel_lncRNA	Others(anti down)	4.17	0.24	-4.11894	1.33109e-21	yes
MSTRG.1187	MSTRG.1187.1	1	-	11406335	11406551	217	1	Novel_lncRNA	Intergenic LncRNAs	4.25	0	-12.0532	4.31054e-06	yes
MSTRG.1201	MSTRG.1201.1	1	-	11519954	11521945	342	2	Novel_lncRNA	Intergenic LncRNAs	1.9	0.22	-3.11042	0.00157708	yes
MSTRG.1206	MSTRG.1206.1	1	-	11616642	11617061	420	1	Novel_lncRNA	Intergenic LncRNAs	4.36	0.18	-4.59826	2.59881e-10	yes
MSTRG.1210	MSTRG.1210.1	1	-	11645093	11645476	384	1	Novel_lncRNA	Intergenic LncRNAs	0.85	0	-9.73132	0.0214131	yes
MSTRG.1214	MSTRG.1214.1	1	+	11683035	11683817	783	1	Novel_lncRNA	Antisense LncRNAs	0.62	2.99	2.26981	2.80578e-06	yes
MSTRG.1226	MSTRG.1226.1	1	-	11815253	11815570	318	1	Novel_lncRNA	Others(anti down)	5.46	0.12	-5.50779	5.38068e-11	yes
MSTRG.1230	MSTRG.1230.1	1	-	11877233	11878167	935	1	Novel_lncRNA	Others(sense updown)	0.17	1.5	3.14136	2.74172e-05	yes
MSTRG.1234	MSTRG.1234.1	1	-	11938827	11939581	755	1	Novel_lncRNA	Intergenic LncRNAs	1.44	1.4	-0.040642	1
MSTRG.1235	MSTRG.1235.1	1	+	11960108	11960450	343	1	Novel_lncRNA	Antisense LncRNAs	0.95	0	-9.89178	0.0214131	yes
MSTRG.1237	MSTRG.1237.1	1	-	12019175	12019433	259	1	Novel_lncRNA	Intergenic LncRNAs	2.1	0	-11.0362	0.00157708	yes
MSTRG.1238	MSTRG.1238.1	1	-	12021178	12022125	557	2	Novel_lncRNA	Intergenic LncRNAs	3.6	0	-11.8138	3.66857e-12	yes
MSTRG.1239	MSTRG.1239.1	1	-	12029806	12030134	261	2	Novel_lncRNA	Intergenic LncRNAs	3.53	0	-11.7855	4.31054e-06	yes
MSTRG.1240	MSTRG.1240.1	1	-	12031740	12032017	278	1	Novel_lncRNA	Intergenic LncRNAs	0.39	0	-8.60733	0.537283
MSTRG.1258	MSTRG.1258.1	1	-	12346697	12350786	3997	2	Novel_lncRNA	Sense LncRNAs	9.34	0.04	-7.86728	4.5745e-226	yes
MSTRG.1259	MSTRG.1259.1	1	+	12348142	12351867	3726	1	Novel_lncRNA	Antisense LncRNAs	2.92	0.01	-8.18982	1.98586e-66	yes
MSTRG.1258	MSTRG.1258.3	1	-	12349623	12350786	1164	1	Novel_lncRNA	Sense LncRNAs	19.03	0.04	-8.89406	1.36405e-134	yes
MSTRG.1260	MSTRG.1260.1	1	+	12363755	12365583	1648	2	Novel_lncRNA	Intergenic LncRNAs	1.48	0.07	-4.4021	5.52997e-14	yes
MSTRG.1261	MSTRG.1261.1	1	-	12378423	12378741	319	1	Novel_lncRNA	Intergenic LncRNAs	1.28	1.65	0.366322	0.870385
MSTRG.1265	MSTRG.1265.2	1	+	12416537	12419585	1070	4	Novel_lncRNA	Sense LncRNAs	8.35	0.44	-4.2462	2.50766e-48	yes
MSTRG.1265	MSTRG.1265.4	1	+	12416537	12419585	2279	5	Novel_lncRNA	Sense LncRNAs	9.14	1.15	-2.99056	2.79208e-82	yes
MSTRG.1265	MSTRG.1265.3	1	+	12416537	12419585	1362	4	Novel_lncRNA	Sense LncRNAs	10.73	0.58	-4.20945	1.61501e-78	yes
MSTRG.1266	MSTRG.1266.1	1	-	12416988	12418826	1839	1	Novel_lncRNA	Antisense LncRNAs	1.36	0	-10.4094	2.2179e-15	yes
MSTRG.1304	MSTRG.1304.1	1	-	13150832	13151236	405	1	Novel_lncRNA	Intergenic LncRNAs	1.88	0	-10.8765	6.00341e-05	yes
MSTRG.1307	MSTRG.1307.1	1	+	13220147	13220437	291	1	Novel_lncRNA	Antisense LncRNAs	0.93	0.39	-1.25376	0.327523
MSTRG.1324	MSTRG.1324.1	1	+	13438411	13438630	220	1	Novel_lncRNA	Intergenic LncRNAs	0.97	0	-9.92184	0.07712
MSTRG.1334	MSTRG.1334.1	1	-	13534392	13536524	798	3	Novel_lncRNA	Intergenic LncRNAs	5.44	0.19	-4.83954	1.6127e-25	yes
MSTRG.1335	MSTRG.1335.1	1	+	13551830	13552098	269	1	Novel_lncRNA	Intergenic LncRNAs	0.2	0	-7.64386	1
MSTRG.1336	MSTRG.1336.1	1	+	13559649	13559882	234	1	Novel_lncRNA	Intergenic LncRNAs	0.93	0	-9.86109	0.07712
MSTRG.1337	MSTRG.1337.1	1	+	13569553	13569883	331	1	Novel_lncRNA	Others(sense updown)	7.1	0.11	-6.01224	1.67296e-14	yes
MSTRG.1339	MSTRG.1339.1	1	+	13573055	13573921	753	2	Novel_lncRNA	Intronic LncRNAs	3.1	0.05	-5.9542	1.67296e-14	yes
MSTRG.1346	MSTRG.1346.1	1	-	13648178	13648718	541	1	Novel_lncRNA	Intergenic LncRNAs	7.62	0.28	-4.76629	4.51962e-24	yes
MSTRG.1350	MSTRG.1350.1	1	+	13790479	13790747	269	1	Novel_lncRNA	Intergenic LncRNAs	0	0.84	9.71425	0.07712
MSTRG.1355	MSTRG.1355.1	1	+	13832069	13833009	329	2	Novel_lncRNA	Intergenic LncRNAs	5.26	0.11	-5.57949	5.38068e-11	yes
MSTRG.1356	MSTRG.1356.1	1	-	13832083	13833011	317	2	Novel_lncRNA	Intergenic LncRNAs	2.85	0.14	-4.34746	8.46889e-06	yes
MSTRG.1366	MSTRG.1366.1	1	+	13921329	13921537	209	1	Novel_lncRNA	Intergenic LncRNAs	0.52	0.18	-1.53051	1
MSTRG.1382	MSTRG.1382.1	1	+	14125098	14125334	237	1	Novel_lncRNA	Intergenic LncRNAs	0.92	0	-9.84549	0.07712
MSTRG.1383	MSTRG.1383.1	1	-	14132921	14133149	229	1	Novel_lncRNA	Bidirectional LncRNAs	1.65	0	-10.6883	0.0111518	yes
MSTRG.1385	MSTRG.1385.1	1	-	14151163	14151922	760	1	Novel_lncRNA	Intergenic LncRNAs	1.86	1.84	-0.0155969	0.94826
MSTRG.1392	MSTRG.1392.1	1	-	14293283	14293564	282	1	Novel_lncRNA	Intergenic LncRNAs	0.58	0	-9.17991	0.284393
MSTRG.1397	MSTRG.1397.1	1	+	14428607	14428817	211	1	Novel_lncRNA	Intergenic LncRNAs	1.54	0	-10.5887	0.0214131	yes
MSTRG.1399	MSTRG.1399.1	1	-	14484872	14485167	296	1	Novel_lncRNA	Intergenic LncRNAs	3.67	0	-11.8416	1.17037e-06	yes
MSTRG.1400	MSTRG.1400.1	1	-	14485467	14485836	370	1	Novel_lncRNA	Intergenic LncRNAs	2.49	0	-11.2819	4.31054e-06	yes
MSTRG.1401	MSTRG.1401.1	1	+	14496497	14496851	355	1	Novel_lncRNA	Others(sense updown)	1.23	0	-10.2644	0.00579257	yes
MSTRG.1403	MSTRG.1403.1	1	+	14516121	14519372	2471	2	Novel_lncRNA	Sense LncRNAs	2.07	0.12	-4.10852	8.86278e-28	yes
MSTRG.1408	MSTRG.1408.1	1	-	14618154	14619124	971	1	Novel_lncRNA	Intergenic LncRNAs	0.67	2.61	1.96182	1.19971e-05	yes
MSTRG.1409	MSTRG.1409.1	1	+	14618813	14619026	214	1	Novel_lncRNA	Intergenic LncRNAs	1.52	0	-10.5699	0.0214131	yes
MSTRG.1413	MSTRG.1413.1	1	-	14706699	14707241	543	1	Novel_lncRNA	Intergenic LncRNAs	1.3	0	-10.3443	0.000115018	yes
MSTRG.1416	MSTRG.1416.3	1	+	14726040	14728334	1335	4	Novel_lncRNA	Sense LncRNAs	47.5	11.07	-2.10127	5.5885e-158	yes
MSTRG.1417	MSTRG.1417.1	1	-	14765127	14765885	759	1	Novel_lncRNA	Intergenic LncRNAs	1.43	1	-0.516015	0.304903
MSTRG.1432	MSTRG.1432.1	1	-	15053425	15053693	269	1	Novel_lncRNA	Intergenic LncRNAs	0.2	0	-7.64386	1
MSTRG.1433	MSTRG.1433.1	1	+	15060584	15060869	286	1	Novel_lncRNA	Intergenic LncRNAs	1.14	0.13	-3.13245	0.0860559
MSTRG.1436	MSTRG.1436.1	1	+	15093653	15093914	262	1	Novel_lncRNA	Bidirectional LncRNAs	2.98	0.29	-3.36119	0.00025944	yes
MSTRG.1437	MSTRG.1437.1	1	+	15110622	15111446	405	2	Novel_lncRNA	Intergenic LncRNAs	0.27	0	-8.07682	0.537283
MSTRG.1438	MSTRG.1438.3	1	+	15119199	15124020	934	3	Novel_lncRNA	Sense LncRNAs	7.38	3	-1.29866	3.22473e-10	yes
MSTRG.1443	MSTRG.1443.1	1	+	15307518	15307843	326	1	Novel_lncRNA	Intergenic LncRNAs	0.67	1.28	0.933911	0.475629
MSTRG.1447	MSTRG.1447.1	1	-	15329832	15331020	426	2	Novel_lncRNA	Others(sense updown)	395.17	42.33	-3.22272	0	yes
MSTRG.1448	MSTRG.1448.1	1	+	15329832	15331793	705	3	Novel_lncRNA	Bidirectional LncRNAs	2.39	0.05	-5.57894	1.04848e-10	yes
MSTRG.1450	MSTRG.1450.1	1	+	15378046	15378362	317	1	Novel_lncRNA	Intergenic LncRNAs	4.81	0.12	-5.32493	1.51832e-09	yes
MSTRG.1452	MSTRG.1452.1	1	+	15397098	15397502	405	1	Novel_lncRNA	Intergenic LncRNAs	46.29	49.8	0.105445	0.809223
MSTRG.1453	MSTRG.1453.1	1	-	15397098	15397501	404	1	Novel_lncRNA	Intergenic LncRNAs	3.97	41.41	3.38277	2.17558e-60	yes
MSTRG.1458	MSTRG.1458.1	1	+	15514025	15514603	579	1	Novel_lncRNA	Intergenic LncRNAs	1.12	0	-10.1293	0.000219491	yes
MSTRG.1462	MSTRG.1462.1	1	+	15598903	15599113	211	1	Novel_lncRNA	Intergenic LncRNAs	1.76	0	-10.7814	0.0111518	yes
MSTRG.1468	MSTRG.1468.1	1	+	15650442	15650931	423	2	Novel_lncRNA	Antisense LncRNAs	4.62	1.79	-1.36793	0.000790244	yes
MSTRG.1471	MSTRG.1471.1	1	-	15663197	15665930	2734	1	Novel_lncRNA	Sense LncRNAs	6.25	0.4	-3.96578	2.31704e-87	yes
MSTRG.1474	MSTRG.1474.1	1	-	15715269	15715513	245	1	Novel_lncRNA	Antisense LncRNAs	0.89	0	-9.79766	0.07712
MSTRG.1480	MSTRG.1480.1	1	-	15786441	15786704	264	1	Novel_lncRNA	Intergenic LncRNAs	155.79	78.46	-0.989573	5.0789e-36
MSTRG.1481	MSTRG.1481.1	1	+	15786449	15786728	280	1	Novel_lncRNA	Intergenic LncRNAs	17.25	13.23	-0.382783	0.052906
MSTRG.1491	MSTRG.1491.1	1	-	15940763	15941146	384	1	Novel_lncRNA	Bidirectional LncRNAs	1.98	0	-10.9513	6.00341e-05	yes
MSTRG.1502	MSTRG.1502.1	1	+	16145981	16146197	217	1	Novel_lncRNA	Intergenic LncRNAs	3.5	0	-11.7731	6.00341e-05	yes
MSTRG.1504	MSTRG.1504.1	1	+	16172232	16174447	998	2	Novel_lncRNA	Sense LncRNAs	1.83	0.72	-1.34577	0.00090292	yes
MSTRG.1513	MSTRG.1513.1	1	-	16282152	16282417	266	1	Novel_lncRNA	Intergenic LncRNAs	0.41	0	-8.67948	0.537283
MSTRG.1516	MSTRG.1516.1	1	-	16351797	16352094	219	2	Novel_lncRNA	Intergenic LncRNAs	0.46	0	-8.84549	0.537283
MSTRG.1518	MSTRG.1518.1	1	+	16357961	16358234	274	1	Novel_lncRNA	Intergenic LncRNAs	4.36	0	-12.0901	3.15374e-07	yes
MSTRG.1519	MSTRG.1519.1	1	-	16358661	16358938	278	1	Novel_lncRNA	Intergenic LncRNAs	2.5	0.55	-2.18442	0.0110396	yes
MSTRG.1520	MSTRG.1520.2	1	-	16361935	16367231	959	5	Novel_lncRNA	Sense LncRNAs	1.48	0	-10.5314	1.12178e-08	yes
MSTRG.1520	MSTRG.1520.1	1	-	16361935	16367231	899	4	Novel_lncRNA	Sense LncRNAs	1.98	0.04	-5.62936	2.73364e-11	yes
MSTRG.1527	MSTRG.1527.1	1	-	16426578	16430013	2213	4	Novel_lncRNA	Sense LncRNAs	3.26	1.45	-1.16882	2.25298e-09	yes
MSTRG.1535	MSTRG.1535.1	1	-	16484392	16484632	241	1	Novel_lncRNA	Others(anti down)	2.03	0	-10.9873	0.00302028	yes
MSTRG.1538	MSTRG.1538.1	1	-	16513272	16515044	982	3	Novel_lncRNA	Intergenic LncRNAs	0.44	2.48	2.49476	2.86224e-07	yes
MSTRG.1542	MSTRG.1542.1	1	+	16551335	16554267	790	5	Novel_lncRNA	Sense LncRNAs	51.59	9.04	-2.5127	3.70001e-130	yes
MSTRG.1548	MSTRG.1548.1	1	-	16607415	16608607	1007	2	Novel_lncRNA	Sense LncRNAs	3.19	1.14	-1.48452	2.69773e-06	yes
MSTRG.1563	MSTRG.1563.2	1	+	16869733	16871833	1178	3	Novel_lncRNA	Sense LncRNAs	2.33	2.16	-0.109299	0.621029
MSTRG.1572	MSTRG.1572.1	1	-	17078999	17079378	380	1	Novel_lncRNA	Intergenic LncRNAs	11.57	402	5.11873	0	yes
MSTRG.1574	MSTRG.1574.1	1	-	17079946	17082416	976	2	Novel_lncRNA	Intergenic LncRNAs	8.12	400.53	5.62429	0	yes
MSTRG.1575	MSTRG.1575.1	1	+	17079946	17082783	1343	2	Novel_lncRNA	Others(sense updown)	5.01	3.46	-0.534039	0.00241672
MSTRG.1579	MSTRG.1579.1	1	-	17087152	17087476	325	1	Novel_lncRNA	Intergenic LncRNAs	28.72	6.98	-2.04076	1.62468e-24	yes
MSTRG.1584	MSTRG.1584.1	1	+	17140620	17141222	426	2	Novel_lncRNA	Bidirectional LncRNAs	26.24	1.69	-3.95667	7.11217e-57	yes
MSTRG.1585	MSTRG.1585.1	1	-	17140620	17141317	521	2	Novel_lncRNA	Others(sense updown)	13.44	0.22	-5.93289	2.02421e-43	yes
MSTRG.1590	MSTRG.1590.1	1	+	17203147	17203369	223	1	Novel_lncRNA	Intergenic LncRNAs	1.82	0.51	-1.83537	0.0806135
MSTRG.1591	MSTRG.1591.1	1	+	17228356	17228574	219	1	Novel_lncRNA	Intergenic LncRNAs	42.62	2.42	-4.13845	2.26447e-49	yes
MSTRG.1592	MSTRG.1592.1	1	+	17234169	17234712	544	1	Novel_lncRNA	Intergenic LncRNAs	7.38	29.32	1.99019	6.94465e-32	yes
MSTRG.1593	MSTRG.1593.1	1	+	17236581	17236990	410	1	Novel_lncRNA	Intergenic LncRNAs	0.13	0.28	1.10692	1
MSTRG.1594	MSTRG.1594.1	1	+	17239963	17240488	526	1	Novel_lncRNA	Intergenic LncRNAs	9.08	8.12	-0.161213	0.327355
MSTRG.1597	MSTRG.1597.1	1	+	17306671	17306997	327	1	Novel_lncRNA	Intergenic LncRNAs	0.83	0.46	-0.851477	0.544753
MSTRG.1602	MSTRG.1602.1	1	+	17389150	17389842	693	1	Novel_lncRNA	Intergenic LncRNAs	1051.41	2180.26	1.05217	0	yes
MSTRG.1603	MSTRG.1603.1	1	-	17389150	17389794	645	1	Novel_lncRNA	Intergenic LncRNAs	4.04	15.53	1.94263	9.58979e-20	yes
MSTRG.1605	MSTRG.1605.1	1	+	17407488	17407985	317	2	Novel_lncRNA	Intergenic LncRNAs	1.88	0.24	-2.96963	0.00291731	yes
MSTRG.1606	MSTRG.1606.1	1	+	17409105	17410409	664	2	Novel_lncRNA	Intergenic LncRNAs	3.35	0.63	-2.41074	1.33905e-07	yes
MSTRG.1613	MSTRG.1613.1	1	-	17502173	17503957	1698	2	Novel_lncRNA	Antisense LncRNAs	1.85	0.8	-1.20945	7.7129e-05	yes
MSTRG.1617	MSTRG.1617.1	1	-	17547733	17548390	658	1	Novel_lncRNA	Others(sense updown)	0.66	1.72	1.38187	0.0389266	yes
MSTRG.1618	MSTRG.1618.1	1	-	17549825	17550040	216	1	Novel_lncRNA	Intergenic LncRNAs	0.5	0	-8.96578	0.537283
MSTRG.1633	MSTRG.1633.1	1	-	17854340	17854638	299	1	Novel_lncRNA	Intergenic LncRNAs	1.09	0	-10.0901	0.0214131	yes
MSTRG.1638	MSTRG.1638.1	1	-	17898921	17899214	294	1	Novel_lncRNA	Intergenic LncRNAs	3.14	0.13	-4.59418	4.31054e-06	yes
MSTRG.1642	MSTRG.1642.1	1	+	17943365	17943605	241	1	Novel_lncRNA	Intergenic LncRNAs	2.42	0.16	-3.91886	0.000820714	yes
MSTRG.1643	MSTRG.1643.1	1	-	17943375	17943598	224	1	Novel_lncRNA	Intergenic LncRNAs	0.79	0	-9.62571	0.14915
MSTRG.1644	MSTRG.1644.1	1	-	17946172	17946532	361	1	Novel_lncRNA	Antisense LncRNAs	0.75	0.42	-0.836501	0.544753
MSTRG.1646	MSTRG.1646.1	1	-	17953524	17954059	536	1	Novel_lncRNA	Intergenic LncRNAs	4.66	0.35	-3.7349	3.73919e-13	yes
MSTRG.1647	MSTRG.1647.1	1	-	17973332	17973597	266	1	Novel_lncRNA	Intergenic LncRNAs	1.65	0	-10.6883	0.00579257	yes
MSTRG.1651	MSTRG.1651.1	1	+	18023042	18023279	238	1	Novel_lncRNA	Intergenic LncRNAs	0.91	0	-9.82972	0.07712
MSTRG.1654	MSTRG.1654.1	1	-	18165329	18166042	353	3	Novel_lncRNA	Sense LncRNAs	13.68	0.32	-5.41785	4.05423e-30	yes
MSTRG.1663	MSTRG.1663.1	1	+	18265773	18266363	591	1	Novel_lncRNA	Intergenic LncRNAs	1.56	0	-10.6073	4.31054e-06	yes
MSTRG.1664	MSTRG.1664.1	1	+	18299314	18299708	395	1	Novel_lncRNA	Antisense LncRNAs	2.34	0.1	-4.54844	4.31054e-06	yes
MSTRG.1669	MSTRG.1669.1	1	+	18334394	18337381	2092	2	Novel_lncRNA	Antisense LncRNAs	3.35	0.47	-2.83343	9.8781e-27	yes
MSTRG.1671	MSTRG.1671.1	1	-	18399233	18399468	236	1	Novel_lncRNA	Intergenic LncRNAs	0.69	0	-9.43045	0.284393
MSTRG.1672	MSTRG.1672.1	1	+	18457310	18457674	365	1	Novel_lncRNA	Intergenic LncRNAs	0.93	0	-9.86109	0.0214131	yes
MSTRG.1673	MSTRG.1673.1	1	-	18457498	18457700	203	1	Novel_lncRNA	Intergenic LncRNAs	1.46	0.35	-2.06054	0.14915
MSTRG.1675	MSTRG.1675.2	1	+	18467149	18469112	735	2	Novel_lncRNA	Sense LncRNAs	1.54	0.14	-3.45943	3.60039e-06	yes
MSTRG.1685	MSTRG.1685.1	1	-	18640345	18643861	2596	4	Novel_lncRNA	Sense LncRNAs	2.42	0.32	-2.91886	8.77092e-25	yes
MSTRG.1686	MSTRG.1686.1	1	+	18655899	18656148	250	1	Novel_lncRNA	Intergenic LncRNAs	0	0.15	7.22882	1
MSTRG.1687	MSTRG.1687.2	1	+	18673851	18677295	3327	2	Novel_lncRNA	Sense LncRNAs	3.95	0	-11.9476	3.14035e-80	yes
MSTRG.1687	MSTRG.1687.3	1	+	18696684	18697867	1106	3	Novel_lncRNA	Sense LncRNAs	29.55	27.52	-0.102678	0.0431021
MSTRG.1689	MSTRG.1689.1	1	-	18696684	18697375	652	2	Novel_lncRNA	Intronic LncRNAs	0.17	0	-7.40939	0.537283
MSTRG.1689	MSTRG.1689.2	1	-	18696698	18697398	490	2	Novel_lncRNA	Intronic LncRNAs	14.78	13.54	-0.126419	0.290652
MSTRG.1693	MSTRG.1693.1	1	-	18702734	18703337	604	1	Novel_lncRNA	Intergenic LncRNAs	3.68	8.32	1.17688	1.6231e-05	yes
MSTRG.1708	MSTRG.1708.1	1	+	18928012	18930504	550	3	Novel_lncRNA	Sense LncRNAs	5.35	0.64	-3.0634	1.91415e-12	yes
MSTRG.1708	MSTRG.1708.3	1	+	18928118	18930504	778	3	Novel_lncRNA	Sense LncRNAs	6.15	0.79	-2.96066	1.64277e-19	yes
MSTRG.1715	MSTRG.1715.1	1	+	19026034	19029546	2744	5	Novel_lncRNA	Sense LncRNAs	3.72	0.43	-3.11289	1.41284e-42	yes
MSTRG.1720	MSTRG.1720.1	1	+	19061657	19065467	3811	1	Novel_lncRNA	Intergenic LncRNAs	1.69	0.07	-4.59352	4.12477e-37	yes
MSTRG.1722	MSTRG.1722.1	1	+	19077156	19078177	1022	1	Novel_lncRNA	Intergenic LncRNAs	1.38	0	-10.4305	1.12178e-08	yes
MSTRG.1728	MSTRG.1728.1	1	-	19153364	19153625	262	1	Novel_lncRNA	Intergenic LncRNAs	0.83	0	-9.69697	0.07712
MSTRG.1748	MSTRG.1748.2	1	+	19359422	19360363	226	2	Novel_lncRNA	Sense LncRNAs	0.79	0	-9.62571	0.14915
MSTRG.1763	MSTRG.1763.1	1	+	19474136	19474661	526	1	Novel_lncRNA	Intergenic LncRNAs	1.34	0	-10.388	0.000115018	yes
MSTRG.1765	MSTRG.1765.1	1	+	19512436	19512938	503	1	Novel_lncRNA	Bidirectional LncRNAs	1.29	0.08	-4.01123	0.000219491	yes
MSTRG.1766	MSTRG.1766.1	1	-	19512454	19512961	508	1	Novel_lncRNA	Others(sense updown)	2.04	1.62	-0.332575	0.571352
MSTRG.1773	MSTRG.1773.1	1	+	19543410	19546325	2916	1	Novel_lncRNA	Antisense LncRNAs	1.38	0	-10.4305	1.62829e-24	yes
MSTRG.1791	MSTRG.1791.10	1	+	19840161	19848682	1810	10	Novel_lncRNA	Sense LncRNAs	59.44	3.61	-4.04136	0	yes
MSTRG.1808	MSTRG.1808.1	1	+	20105726	20106601	726	2	Novel_lncRNA	Intergenic LncRNAs	2.69	0.36	-2.90154	1.54667e-08	yes
MSTRG.1810	MSTRG.1810.1	1	+	20195445	20195765	321	1	Novel_lncRNA	Intergenic LncRNAs	3.38	0	-11.7228	1.17037e-06	yes
MSTRG.1813	MSTRG.1813.1	1	-	20248332	20249720	915	3	Novel_lncRNA	Intergenic LncRNAs	3.68	0	-11.8455	2.18588e-20	yes
MSTRG.1820	MSTRG.1820.1	1	-	20329142	20329823	570	2	Novel_lncRNA	Sense LncRNAs	1.81	0.46	-1.97628	0.00243189	yes
MSTRG.1828	MSTRG.1828.1	1	-	20427830	20428050	221	1	Novel_lncRNA	Others(sense updown)	2.21	0.17	-3.70044	0.00302028	yes
MSTRG.1829	MSTRG.1829.1	1	+	20427834	20428117	284	1	Novel_lncRNA	Others(anti down)	1.91	0	-10.8994	0.00157708	yes
MSTRG.1843	MSTRG.1843.1	1	-	20576106	20576662	557	1	Novel_lncRNA	Bidirectional LncRNAs	1.17	0.14	-3.06301	0.00157708	yes
MSTRG.1877	MSTRG.1877.1	1	-	20935290	20936690	858	2	Novel_lncRNA	Intergenic LncRNAs	7.4	0.26	-4.83094	4.73528e-38	yes
MSTRG.1894	MSTRG.1894.1	1	-	21101826	21102131	306	1	Novel_lncRNA	Bidirectional LncRNAs	0	0.37	8.53138	0.284393
MSTRG.1914	MSTRG.1914.1	1	-	21299765	21300077	313	1	Novel_lncRNA	Intergenic LncRNAs	3.99	0	-11.9622	1.62126e-07	yes
MSTRG.1918	MSTRG.1918.1	1	-	21323110	21323461	352	1	Novel_lncRNA	Intergenic LncRNAs	1.93	0	-10.9144	0.000219491	yes
MSTRG.1937	MSTRG.1937.1	1	+	21446867	21447089	223	1	Novel_lncRNA	Intergenic LncRNAs	0.24	0	-7.90689	1
MSTRG.1939	MSTRG.1939.1	1	-	21492776	21493012	237	1	Novel_lncRNA	Intergenic LncRNAs	0.69	0	-9.43045	0.284393
MSTRG.1958	MSTRG.1958.1	1	+	21622353	21622941	589	1	Novel_lncRNA	Intergenic LncRNAs	6.31	1.72	-1.87523	3.75968e-09	yes
MSTRG.1969	MSTRG.1969.1	1	+	21679777	21687431	975	2	Novel_lncRNA	Antisense LncRNAs	0.89	0.16	-2.47573	0.0014209	yes
MSTRG.1980	MSTRG.1980.2	1	+	21798728	21801283	1775	2	Novel_lncRNA	Sense LncRNAs	3.7	20.62	2.47845	9.03811e-93	yes
MSTRG.1982	MSTRG.1982.1	1	+	21840943	21843925	2191	3	Novel_lncRNA	Antisense LncRNAs	2.28	0.09	-4.66297	1.36551e-29	yes
MSTRG.1996	MSTRG.1996.1	1	-	21996887	21997152	266	1	Novel_lncRNA	Intergenic LncRNAs	2.04	0.43	-2.24616	0.0182764	yes
MSTRG.2014	MSTRG.2014.1	1	+	22198749	22199187	342	2	Novel_lncRNA	Sense LncRNAs	0	3.98	11.9586	4.41706e-08	yes
MSTRG.2017	MSTRG.2017.1	1	-	22209399	22209621	223	1	Novel_lncRNA	Intergenic LncRNAs	0.88	0	-9.78136	0.14915
MSTRG.2041	MSTRG.2041.1	1	-	22473617	22473912	296	1	Novel_lncRNA	Intergenic LncRNAs	6.23	0.77	-3.0163	8.81842e-08	yes
MSTRG.2057	MSTRG.2057.1	1	-	22648279	22656543	4199	2	Novel_lncRNA	Bidirectional LncRNAs	1.76	0.01	-7.45943	3.45899e-45	yes
MSTRG.2073	MSTRG.2073.1	1	-	22837381	22839875	2495	1	Novel_lncRNA	Sense LncRNAs	6.35	1.23	-2.3681	8.95626e-49	yes
MSTRG.2078	MSTRG.2078.1	1	-	22910694	22911062	369	1	Novel_lncRNA	Intergenic LncRNAs	22.3	16.83	-0.406009	0.0075064
MSTRG.2079	MSTRG.2079.1	1	-	22911895	22912211	317	1	Novel_lncRNA	Intergenic LncRNAs	2.54	0	-11.3106	3.11919e-05	yes
MSTRG.2086	MSTRG.2086.1	1	+	22980282	22981201	920	1	Novel_lncRNA	Intergenic LncRNAs	9.17	0.5	-4.19692	3.27229e-45	yes
MSTRG.2087	MSTRG.2087.1	1	-	22980282	22981200	919	1	Novel_lncRNA	Intergenic LncRNAs	4.77	0.33	-3.85345	3.42569e-22	yes
MSTRG.2088	MSTRG.2088.1	1	-	22981569	22981829	261	1	Novel_lncRNA	Intergenic LncRNAs	3.95	0	-11.9476	2.23847e-06	yes
MSTRG.2089	MSTRG.2089.1	1	+	22981569	22981829	261	1	Novel_lncRNA	Intergenic LncRNAs	2.91	0.43	-2.75861	0.00211068	yes
MSTRG.2090	MSTRG.2090.1	1	-	22982834	22983977	1144	1	Novel_lncRNA	Others(sense updown)	39.66	6.25	-2.66576	2.27301e-154	yes
MSTRG.2091	MSTRG.2091.1	1	+	22983263	22983596	334	1	Novel_lncRNA	Intergenic LncRNAs	8.29	0.57	-3.86234	8.09418e-15	yes
MSTRG.2093	MSTRG.2093.1	1	+	22984941	22985168	228	1	Novel_lncRNA	Antisense LncRNAs	2.38	0	-11.2167	0.00157708	yes
MSTRG.2094	MSTRG.2094.1	1	+	22985744	22987327	1584	1	Novel_lncRNA	Bidirectional LncRNAs	651.64	860.61	0.401284	7.45062e-42
MSTRG.2095	MSTRG.2095.1	1	-	22986218	22987337	1120	1	Novel_lncRNA	Intergenic LncRNAs	10.04	0.65	-3.94918	1.98432e-57	yes
MSTRG.2115	MSTRG.2115.6	1	-	23212722	23214682	332	4	Novel_lncRNA	Sense LncRNAs	8.83	0.11	-6.32684	4.91482e-18	yes
MSTRG.2119	MSTRG.2119.1	1	-	23252486	23255576	2699	2	Novel_lncRNA	Antisense LncRNAs	5.29	0.21	-4.65481	5.03872e-82	yes
MSTRG.2141	MSTRG.2141.1	1	-	23442909	23443138	230	1	Novel_lncRNA	Antisense LncRNAs	2.6	0	-11.3443	0.000418506	yes
MSTRG.2171	MSTRG.2171.1	1	+	23774519	23775601	421	2	Novel_lncRNA	Others(lnc(mRNA))	1.83	0	-10.8376	6.00341e-05	yes
MSTRG.2172	MSTRG.2172.1	1	+	23774853	23775121	269	1	Novel_lncRNA	Antisense LncRNAs	4.03	0	-11.9766	1.17037e-06	yes
MSTRG.2199	MSTRG.2199.1	1	+	24044670	24044896	227	1	Novel_lncRNA	Intergenic LncRNAs	1.2	0	-10.2288	0.0406196	yes
MSTRG.2219	MSTRG.2219.1	1	-	24299970	24300281	312	1	Novel_lncRNA	Intergenic LncRNAs	2.61	0	-11.3498	3.11919e-05	yes
MSTRG.2240	MSTRG.2240.1	1	+	24553048	24558748	996	4	Novel_lncRNA	Antisense LncRNAs	4.69	0.76	-2.62552	5.11839e-17	yes
MSTRG.2241	MSTRG.2241.1	1	+	24559710	24559914	205	1	Novel_lncRNA	Intergenic LncRNAs	3.18	0.18	-4.14296	0.000219491	yes
MSTRG.2242	MSTRG.2242.1	1	+	24571369	24571624	256	1	Novel_lncRNA	Intergenic LncRNAs	0.85	0.81	-0.0695409	1
MSTRG.2252	MSTRG.2252.1	1	+	24654397	24659674	1051	3	Novel_lncRNA	Sense LncRNAs	2.79	0	-11.446	4.91482e-18	yes
MSTRG.2273	MSTRG.2273.1	1	-	24825835	24826074	240	1	Novel_lncRNA	Antisense LncRNAs	1.13	1.84	0.703383	0.508789
MSTRG.2294	MSTRG.2294.6	1	-	24973082	24978068	4690	3	Novel_lncRNA	Antisense LncRNAs	3.55	0.33	-3.42728	3.39353e-75	yes
MSTRG.2298	MSTRG.2298.1	1	+	25012279	25012730	284	2	Novel_lncRNA	Intergenic LncRNAs	2.23	0	-11.1228	0.000418506	yes
MSTRG.2299	MSTRG.2299.1	1	-	25014672	25015743	1072	1	Novel_lncRNA	Intergenic LncRNAs	1	0.41	-1.2863	0.0274692	yes
MSTRG.2300	MSTRG.2300.1	1	-	25016105	25017216	506	2	Novel_lncRNA	Intergenic LncRNAs	1.93	0.15	-3.68557	2.31723e-05	yes
MSTRG.2302	MSTRG.2302.1	1	-	25017961	25018321	361	1	Novel_lncRNA	Intergenic LncRNAs	5.11	0.31	-4.04298	2.59881e-10	yes
MSTRG.2304	MSTRG.2304.1	1	-	25018435	25019249	437	2	Novel_lncRNA	Intergenic LncRNAs	3.23	0.26	-3.63495	6.30093e-07	yes
MSTRG.2337	MSTRG.2337.1	1	+	25351114	25412198	651	2	Novel_lncRNA	Antisense LncRNAs	7.17	1.39	-2.36689	9.21641e-15	yes
MSTRG.2339	MSTRG.2339.1	1	-	25383747	25384346	342	2	Novel_lncRNA	Intergenic LncRNAs	49.91	3.33	-3.90573	2.99468e-86	yes
MSTRG.2378	MSTRG.2378.1	1	-	25705357	25706419	1063	1	Novel_lncRNA	Intergenic LncRNAs	0.51	3.13	2.61759	5.51533e-10	yes
MSTRG.2393	MSTRG.2393.8	1	+	25837512	25842230	1104	7	Novel_lncRNA	Sense LncRNAs	2.78	0	-11.4409	6.44575e-19	yes
MSTRG.2393	MSTRG.2393.7	1	+	25837512	25842230	3797	5	Novel_lncRNA	Sense LncRNAs	6.84	1.32	-2.37346	1.05599e-78	yes
MSTRG.2393	MSTRG.2393.6	1	+	25837512	25842230	1199	8	Novel_lncRNA	Sense LncRNAs	10.15	1.91	-2.40984	2.77174e-38	yes
MSTRG.2406	MSTRG.2406.1	1	-	25957598	25957936	339	1	Novel_lncRNA	Intergenic LncRNAs	21.94	82.64	1.91328	9.01341e-52	yes
MSTRG.2407	MSTRG.2407.1	1	+	25957694	25957936	243	1	Novel_lncRNA	Intergenic LncRNAs	0	10.27	13.3261	5.52997e-14	yes
MSTRG.2418	MSTRG.2418.1	1	-	26069720	26070226	507	1	Novel_lncRNA	Intronic LncRNAs	188.61	269.47	0.514718	3.59684e-21
MSTRG.2438	MSTRG.2438.1	1	-	26244999	26250009	1062	2	Novel_lncRNA	Sense LncRNAs	0.56	1.5	1.42146	0.00977201	yes
MSTRG.2451	MSTRG.2451.1	1	-	26343517	26344264	748	1	Novel_lncRNA	Intergenic LncRNAs	1.02	0.56	-0.86507	0.200273
MSTRG.2467	MSTRG.2467.1	1	-	26509124	26509430	307	1	Novel_lncRNA	Intergenic LncRNAs	3.36	0	-11.7142	2.23847e-06	yes
MSTRG.2469	MSTRG.2469.1	1	-	26536560	26537156	597	1	Novel_lncRNA	Bidirectional LncRNAs	1.64	0	-10.6795	2.23847e-06	yes
MSTRG.2484	MSTRG.2484.1	1	-	26675705	26676115	411	1	Novel_lncRNA	Intergenic LncRNAs	5.68	31.46	2.46956	3.16896e-34	yes
MSTRG.2486	MSTRG.2486.1	1	-	26685303	26700935	709	2	Novel_lncRNA	Sense LncRNAs	3.55	0.98	-1.85697	1.1576e-06	yes
MSTRG.2486	MSTRG.2486.2	1	-	26685335	26700935	751	3	Novel_lncRNA	Sense LncRNAs	10.42	0.76	-3.77721	2.61977e-39	yes
MSTRG.2497	MSTRG.2497.2	1	-	26767382	26769709	1371	3	Novel_lncRNA	Sense LncRNAs	0	1.03	10.0084	2.3319e-08	yes
MSTRG.2500	MSTRG.2500.3	1	+	26790542	26793127	484	3	Novel_lncRNA	Sense LncRNAs	13.39	4.07	-1.71806	8.01864e-14	yes
MSTRG.2501	MSTRG.2501.1	1	-	26801731	26802085	355	1	Novel_lncRNA	Intergenic LncRNAs	1.68	0	-10.7142	0.000418506	yes
MSTRG.2550	MSTRG.2550.1	1	-	27252889	27253128	240	1	Novel_lncRNA	Intergenic LncRNAs	1.36	0	-10.4094	0.0214131	yes
MSTRG.2576	MSTRG.2576.3	1	+	27585820	27592967	1063	2	Novel_lncRNA	Sense LncRNAs	0.92	0.11	-3.06413	0.000124702	yes
MSTRG.2591	MSTRG.2591.1	1	+	27785688	27786732	1045	1	Novel_lncRNA	Antisense LncRNAs	1.25	0.58	-1.1078	0.0228337	yes
MSTRG.2602	MSTRG.2602.1	1	+	27886718	27887059	342	1	Novel_lncRNA	Others(anti down)	1.14	0.22	-2.37346	0.0501844
MSTRG.2603	MSTRG.2603.1	1	+	27888373	27889965	1405	3	Novel_lncRNA	Sense LncRNAs	9.4	1.99	-2.23989	2.86402e-38	yes
MSTRG.2607	MSTRG.2607.2	1	-	27905932	27906871	765	2	Novel_lncRNA	Others(sense updown)	2.91	0	-11.5068	1.26434e-13	yes
MSTRG.2607	MSTRG.2607.1	1	-	27905932	27906872	760	2	Novel_lncRNA	Others(sense updown)	2.35	1.29	-0.86529	0.0252776
MSTRG.2694	MSTRG.2694.1	1	-	28667286	28667608	323	1	Novel_lncRNA	Intergenic LncRNAs	2.69	0.23	-3.5479	7.82158e-05	yes
MSTRG.2696	MSTRG.2696.1	1	-	28693335	28693619	285	1	Novel_lncRNA	Intergenic LncRNAs	0.57	0	-9.15482	0.284393
MSTRG.2720	MSTRG.2720.1	1	-	28904985	28911090	3465	2	Novel_lncRNA	Sense LncRNAs	4.23	0.43	-3.29825	1.06686e-64	yes
MSTRG.2725	MSTRG.2725.1	1	+	28948289	28948582	294	1	Novel_lncRNA	Intergenic LncRNAs	1.73	0.38	-2.1867	0.0303785	yes
MSTRG.2741	MSTRG.2741.1	1	+	29037053	29040070	2898	2	Novel_lncRNA	Antisense LncRNAs	2.31	0.35	-2.72247	5.3356e-25	yes
MSTRG.2760	MSTRG.2760.1	1	-	29203149	29203443	295	1	Novel_lncRNA	Intergenic LncRNAs	1.29	0	-10.3332	0.0111518	yes
MSTRG.2803	MSTRG.2803.1	1	+	29601275	29602081	807	1	Novel_lncRNA	Antisense LncRNAs	2.56	0.14	-4.19265	1.02697e-11	yes
MSTRG.2807	MSTRG.2807.1	1	-	29625641	29625890	250	1	Novel_lncRNA	Others(sense updown)	1.09	0	-10.0901	0.0406196	yes
MSTRG.2826	MSTRG.2826.1	1	+	29732202	29732664	463	1	Novel_lncRNA	Bidirectional LncRNAs	1.88	0	-10.8765	1.6231e-05	yes
MSTRG.2836	MSTRG.2836.1	1	+	29809363	29809732	248	2	Novel_lncRNA	Intergenic LncRNAs	0.88	0	-9.78136	0.07712
MSTRG.2839	MSTRG.2839.1	1	+	29814595	29815632	860	2	Novel_lncRNA	Antisense LncRNAs	12.49	2.59	-2.26975	5.29906e-32	yes
MSTRG.2893	MSTRG.2893.1	1	+	30332224	30332733	510	1	Novel_lncRNA	Intergenic LncRNAs	83.85	4.45	-4.23593	2.09463e-225	yes
MSTRG.2895	MSTRG.2895.1	1	-	30335017	30336199	1076	2	Novel_lncRNA	Sense LncRNAs	3.93	2.39	-0.717519	0.00270079
MSTRG.2896	MSTRG.2896.1	1	-	30340456	30340947	492	1	Novel_lncRNA	Intergenic LncRNAs	6.18	0	-12.5934	1.27337e-18	yes
MSTRG.2908	MSTRG.2908.1	1	+	30472286	30473246	809	2	Novel_lncRNA	Intergenic LncRNAs	2.28	0.56	-2.02554	1.99519e-05	yes
MSTRG.2955	MSTRG.2955.1	1	-	30847430	30848100	489	2	Novel_lncRNA	Antisense LncRNAs	1	0.23	-2.12029	0.0303785	yes
MSTRG.2969	MSTRG.2969.1	1	+	30861703	30862827	667	3	Novel_lncRNA	Bidirectional LncRNAs	4.59	0.11	-5.38292	3.27632e-19	yes
MSTRG.2969	MSTRG.2969.2	1	+	30861703	30862734	573	3	Novel_lncRNA	Bidirectional LncRNAs	24.58	1.91	-3.68584	6.04353e-68	yes
MSTRG.2969	MSTRG.2969.3	1	+	30861703	30862734	573	3	Novel_lncRNA	Bidirectional LncRNAs	24.58	1.91	-3.68584	6.04353e-68	yes
MSTRG.2985	MSTRG.2985.1	1	-	30916310	30916631	322	1	Novel_lncRNA	Bidirectional LncRNAs	2.36	0.23	-3.35908	0.000469508	yes
MSTRG.3000	MSTRG.3000.1	1	+	31019483	31020284	802	1	Novel_lncRNA	Intergenic LncRNAs	0.27	1.56	2.53051	0.00034941	yes
MSTRG.3004	MSTRG.3004.1	1	+	31057701	31057978	278	1	Novel_lncRNA	Intergenic LncRNAs	1.25	0	-10.2877	0.0214131	yes
MSTRG.3005	MSTRG.3005.2	1	-	31061316	31062127	223	2	Novel_lncRNA	Sense LncRNAs	0.49	0.17	-1.52725	1
MSTRG.3006	MSTRG.3006.1	1	+	31070364	31070613	250	1	Novel_lncRNA	Intergenic LncRNAs	0.65	0.15	-2.11548	0.421081
MSTRG.3020	MSTRG.3020.1	1	-	31237266	31237607	342	1	Novel_lncRNA	Intergenic LncRNAs	3.34	0.55	-2.60234	9.60117e-05	yes
MSTRG.3032	MSTRG.3032.1	1	+	31354255	31354824	570	1	Novel_lncRNA	Others(sense updown),Others(sense updown)	1.62	0	-10.6618	4.31054e-06	yes
MSTRG.3053	MSTRG.3053.1	1	+	31604430	31604696	267	1	Novel_lncRNA	Intergenic LncRNAs	1.42	0.28	-2.34239	0.0501844
MSTRG.3054	MSTRG.3054.1	1	-	31604430	31604696	267	1	Novel_lncRNA	Intergenic LncRNAs	2.44	0.28	-3.12338	0.00157708	yes
MSTRG.3105	MSTRG.3105.1	1	+	31946096	31946314	219	1	Novel_lncRNA	Intronic LncRNAs	3.72	0	-11.8611	3.11919e-05	yes
MSTRG.3106	MSTRG.3106.1	1	-	31969551	31978766	7369	4	Novel_lncRNA	Antisense LncRNAs	3.08	0.35	-3.1375	1.10173e-93	yes
MSTRG.3139	MSTRG.3139.1	1	+	32305749	32305973	225	1	Novel_lncRNA	Intergenic LncRNAs	3.38	0.17	-4.31342	6.00341e-05	yes
MSTRG.3140	MSTRG.3140.1	1	-	32305792	32306003	212	1	Novel_lncRNA	Intergenic LncRNAs	1.54	0	-10.5887	0.0214131	yes
MSTRG.3157	MSTRG.3157.3	1	+	32489080	32489925	569	3	Novel_lncRNA	Sense LncRNAs	2.56	2.39	-0.0991332	0.747768
MSTRG.3169	MSTRG.3169.1	1	+	32597743	32598120	378	1	Novel_lncRNA	Intergenic LncRNAs	304.22	570.34	0.906707	1.52908e-92
MSTRG.3170	MSTRG.3170.1	1	-	32597747	32598119	373	1	Novel_lncRNA	Intergenic LncRNAs	76.82	71.96	-0.0942868	0.0749584
MSTRG.3191	MSTRG.3191.1	1	-	32765860	32766214	231	2	Novel_lncRNA	Intergenic LncRNAs	12.85	0	-13.6495	2.50941e-18	yes
MSTRG.3203	MSTRG.3203.1	1	-	32865883	32869587	3489	3	Novel_lncRNA	Intergenic LncRNAs	7.3	0.98	-2.89704	7.95764e-97	yes
MSTRG.3228	MSTRG.3228.1	1	+	33053488	33053743	256	1	Novel_lncRNA	Intergenic LncRNAs	4.51	0	-12.1389	6.10507e-07	yes
MSTRG.3232	MSTRG.3232.1	1	-	33078078	33079953	444	2	Novel_lncRNA	Antisense LncRNAs	0.24	0.51	1.08746	0.771216
MSTRG.3243	MSTRG.3243.1	1	+	33156838	33157208	371	1	Novel_lncRNA	Intergenic LncRNAs	0	1.51	10.5603	0.000418506	yes
MSTRG.3246	MSTRG.3246.1	1	-	33234555	33235537	869	2	Novel_lncRNA	Intergenic LncRNAs	1.19	0.26	-2.19438	0.000893827	yes
MSTRG.3253	MSTRG.3253.1	1	-	33288947	33289225	279	1	Novel_lncRNA	Intergenic LncRNAs	2.97	0	-11.5362	1.6231e-05	yes
MSTRG.3256	MSTRG.3256.1	1	-	33317119	33317610	492	1	Novel_lncRNA	Intergenic LncRNAs	0.99	0	-9.95128	0.00302028	yes
MSTRG.3257	MSTRG.3257.1	1	+	33317666	33317932	267	1	Novel_lncRNA	Intergenic LncRNAs	1.42	0.14	-3.34239	0.0501844
MSTRG.3270	MSTRG.3270.2	1	-	33431264	33432731	863	6	Novel_lncRNA	Sense LncRNAs	8.17	2.35	-1.79768	3.92563e-16	yes
MSTRG.3271	MSTRG.3271.1	1	-	33434698	33435230	533	1	Novel_lncRNA	Intergenic LncRNAs	6.85	1.44	-2.25004	2.50633e-11	yes
MSTRG.3274	MSTRG.3274.1	1	+	33451305	33453482	1914	2	Novel_lncRNA	Intergenic LncRNAs	2.35	0.1	-4.55459	2.16026e-26	yes
MSTRG.3321	MSTRG.3321.1	1	-	33824198	33824502	305	1	Novel_lncRNA	Bidirectional LncRNAs	379.35	986.53	1.37883	3.87621e-257	yes
MSTRG.3322	MSTRG.3322.1	1	+	33824201	33824488	288	1	Novel_lncRNA	Others(sense updown)	12.06	13.78	0.192346	0.684362
MSTRG.3332	MSTRG.3332.1	1	-	33933110	33933312	203	1	Novel_lncRNA	Intergenic LncRNAs	0.27	0	-8.07682	1
MSTRG.3353	MSTRG.3353.1	1	+	34136624	34136879	256	1	Novel_lncRNA	Intergenic LncRNAs	2.54	0	-11.3106	0.000219491	yes
MSTRG.3358	MSTRG.3358.1	1	-	34199040	34199316	277	1	Novel_lncRNA	Intergenic LncRNAs	0.59	0	-9.20457	0.284393
MSTRG.3387	MSTRG.3387.1	1	+	34378190	34378514	263	2	Novel_lncRNA	Intergenic LncRNAs	8.11	0.15	-5.75667	2.47938e-13	yes
MSTRG.3434	MSTRG.3434.1	1	+	34745913	34746477	565	1	Novel_lncRNA	Others(sense updown)	1.82	0	-10.8297	2.23847e-06	yes
MSTRG.3437	MSTRG.3437.1	1	+	34766375	34767175	801	1	Novel_lncRNA	Intergenic LncRNAs	1.69	1.84	0.122683	1
MSTRG.3447	MSTRG.3447.1	1	+	34856926	34862271	435	2	Novel_lncRNA	Bidirectional LncRNAs	0.25	0	-7.96578	0.537283
MSTRG.3511	MSTRG.3511.1	1	-	35305667	35323915	463	2	Novel_lncRNA	Bidirectional LncRNAs	27.43	2.69	-3.35008	1.90781e-56	yes
MSTRG.3512	MSTRG.3512.1	1	+	35305667	35323915	463	2	Novel_lncRNA	Others(sense updown)	10.78	1.55	-2.79802	2.201e-19	yes
MSTRG.3560	MSTRG.3560.1	1	+	35758085	35758887	622	2	Novel_lncRNA	Intergenic LncRNAs	4.19	0	-12.0327	5.75172e-16	yes
MSTRG.3561	MSTRG.3561.1	1	-	35758085	35758887	622	2	Novel_lncRNA	Intergenic LncRNAs	1.48	0	-10.5314	4.31054e-06	yes
MSTRG.3562	MSTRG.3562.1	1	+	35759336	35759547	212	1	Novel_lncRNA	Intergenic LncRNAs	1.02	0	-9.99435	0.07712
MSTRG.3567	MSTRG.3567.1	1	+	35794229	35794483	255	1	Novel_lncRNA	Others(anti down)	0.21	0	-7.71425	1
MSTRG.3576	MSTRG.3576.1	1	-	35852854	35853219	366	1	Novel_lncRNA	Intergenic LncRNAs	116.55	25.82	-2.17439	3.36804e-114	yes
MSTRG.3578	MSTRG.3578.1	1	-	35853727	35854000	274	1	Novel_lncRNA	Bidirectional LncRNAs	1.9	0.16	-3.56986	0.00933621	yes
MSTRG.3586	MSTRG.3586.1	1	-	35873270	35873790	521	1	Novel_lncRNA	Intronic LncRNAs	0.73	0	-9.51175	0.0111518	yes
MSTRG.3634	MSTRG.3634.1	1	+	36235573	36236050	478	1	Novel_lncRNA	Intergenic LncRNAs	3.75	0	-11.8727	5.38068e-11	yes
MSTRG.3640	MSTRG.3640.1	1	+	36275446	36275758	313	1	Novel_lncRNA	Intergenic LncRNAs	0.87	0	-9.76487	0.0406196	yes
MSTRG.3643	MSTRG.3643.1	1	+	36296607	36296897	291	1	Novel_lncRNA	Others(anti down)	2.8	0	-11.4512	3.11919e-05	yes
MSTRG.3650	MSTRG.3650.1	1	-	36359162	36360036	875	1	Novel_lncRNA	Intergenic LncRNAs	0.12	0.04	-1.58496	1
MSTRG.3656	MSTRG.3656.1	1	-	36418564	36421653	1797	3	Novel_lncRNA	Antisense LncRNAs	0.58	0.21	-1.46566	0.0152513	yes
MSTRG.3668	MSTRG.3668.1	1	+	36508417	36514555	3546	9	Novel_lncRNA	Sense LncRNAs	3.37	0.87	-1.95366	2.64003e-29	yes
MSTRG.3670	MSTRG.3670.2	1	+	36521978	36523940	828	3	Novel_lncRNA	Sense LncRNAs	2.89	0.86	-1.74866	6.52522e-06	yes
MSTRG.3691	MSTRG.3691.3	1	+	36693651	36695789	1595	3	Novel_lncRNA	Sense LncRNAs	0	0.81	9.66178	1.6074e-07	yes
MSTRG.3691	MSTRG.3691.2	1	+	36693651	36695789	1601	3	Novel_lncRNA	Sense LncRNAs	0.71	4.32	2.60514	4.12907e-20	yes
MSTRG.3711	MSTRG.3711.1	1	+	36843560	36843991	432	1	Novel_lncRNA	Bidirectional LncRNAs	6.28	0	-12.6165	1.47718e-16	yes
MSTRG.3712	MSTRG.3712.1	1	-	36843577	36843948	372	1	Novel_lncRNA	Others(sense updown)	3.94	0.51	-2.94963	1.88079e-06	yes
MSTRG.3721	MSTRG.3721.1	1	+	36921517	36921948	432	1	Novel_lncRNA	Intergenic LncRNAs	2.64	0	-11.3663	6.10507e-07	yes
MSTRG.3748	MSTRG.3748.1	1	+	37138357	37138661	305	1	Novel_lncRNA	Intergenic LncRNAs	3.74	0	-11.8688	6.10507e-07	yes
MSTRG.3749	MSTRG.3749.1	1	-	37138357	37138640	284	1	Novel_lncRNA	Intergenic LncRNAs	3.39	0.13	-4.7047	4.31054e-06	yes
MSTRG.3803	MSTRG.3803.1	1	-	37605567	37606278	535	2	Novel_lncRNA	Others(sense updown)	527.68	1.06	-8.95946	0	yes
MSTRG.3817	MSTRG.3817.1	1	-	37750037	37750593	557	1	Novel_lncRNA	Antisense LncRNAs	4.09	0	-11.9979	6.42263e-14	yes
MSTRG.3820	MSTRG.3820.1	1	-	37779665	37784961	1860	5	Novel_lncRNA	Sense LncRNAs	7.06	1.22	-2.53279	4.33486e-44	yes
MSTRG.3822	MSTRG.3822.8	1	+	37804803	37817825	807	5	Novel_lncRNA	Antisense LncRNAs	6.2	0.65	-3.25376	2.4268e-22	yes
MSTRG.3835	MSTRG.3835.4	1	-	37879000	37880490	1309	2	Novel_lncRNA	Sense LncRNAs	3.57	2.6	-0.457412	0.0268893
MSTRG.3881	MSTRG.3881.1	1	+	38266441	38267263	434	2	Novel_lncRNA	Antisense LncRNAs	2.98	0.7	-2.08989	0.00034941	yes
MSTRG.3882	MSTRG.3882.1	1	-	38267543	38267913	371	1	Novel_lncRNA	Others(sense updown)	1.32	0	-10.3663	0.00302028	yes
MSTRG.3885	MSTRG.3885.1	1	-	38322201	38322486	286	1	Novel_lncRNA	Intergenic LncRNAs	1.71	0	-10.7398	0.00302028	yes
MSTRG.3886	MSTRG.3886.1	1	+	38322226	38322536	311	1	Novel_lncRNA	Intergenic LncRNAs	0.52	0.12	-2.11548	0.421081
MSTRG.3894	MSTRG.3894.1	1	+	38415326	38415579	254	1	Novel_lncRNA	Bidirectional LncRNAs	0.43	0	-8.74819	0.537283
MSTRG.3979	MSTRG.3979.1	1	+	39224285	39224521	237	1	Novel_lncRNA	Intergenic LncRNAs	0.46	0	-8.84549	0.537283
MSTRG.3983	MSTRG.3983.1	1	-	39255797	39256098	302	1	Novel_lncRNA	Intergenic LncRNAs	2.98	0	-11.5411	8.46889e-06	yes
MSTRG.3984	MSTRG.3984.1	1	+	39255825	39256262	438	1	Novel_lncRNA	Intergenic LncRNAs	1.24	0	-10.2761	0.00157708	yes
MSTRG.4004	MSTRG.4004.1	1	+	39433720	39434069	327	2	Novel_lncRNA	Intergenic LncRNAs	0.83	0	-9.69697	0.0406196	yes
MSTRG.4020	MSTRG.4020.1	1	-	39540982	39541499	369	2	Novel_lncRNA	Sense LncRNAs	2.21	0.61	-1.85717	0.00642701	yes
MSTRG.4025	MSTRG.4025.1	1	+	39568529	39568738	210	1	Novel_lncRNA	Intergenic LncRNAs	2.46	0	-11.2644	0.00157708	yes
MSTRG.4033	MSTRG.4033.1	1	-	39638056	39638393	338	1	Novel_lncRNA	Intergenic LncRNAs	0.48	0	-8.90689	0.284393
MSTRG.4036	MSTRG.4036.1	1	+	39655676	39655936	261	1	Novel_lncRNA	Antisense LncRNAs	2.22	0.43	-2.36815	0.0182764	yes
MSTRG.4047	MSTRG.4047.1	1	+	39700035	39700510	476	1	Novel_lncRNA	Others(sense updown)	2.92	0.32	-3.18982	6.30093e-07	yes
MSTRG.4050	MSTRG.4050.1	1	-	39704620	39705108	489	1	Novel_lncRNA	Intergenic LncRNAs	5.96	0	-12.5411	4.91482e-18	yes
MSTRG.4052	MSTRG.4052.1	1	+	39718966	39719488	523	1	Novel_lncRNA	Intergenic LncRNAs	1.76	0.29	-2.60145	0.00082166	yes
MSTRG.4066	MSTRG.4066.1	1	+	39824328	39824545	218	1	Novel_lncRNA	Bidirectional LncRNAs	2.24	2.25	0.00642627	1
MSTRG.4070	MSTRG.4070.1	1	+	39843113	39843389	277	1	Novel_lncRNA	Bidirectional LncRNAs	8.03	0.27	-4.89437	6.42263e-14	yes
MSTRG.9800	MSTRG.9800.1	2	-	375150	376782	1633	1	Novel_lncRNA	Antisense LncRNAs	2.79	0.46	-2.60056	1.56378e-16	yes
MSTRG.9803	MSTRG.9803.2	2	-	386036	386790	322	3	Novel_lncRNA	Sense LncRNAs	1.35	0	-10.3987	0.00579257	yes
MSTRG.9821	MSTRG.9821.1	2	+	540716	541835	466	2	Novel_lncRNA	Others(sense updown)	0.58	0.24	-1.27302	0.327523
MSTRG.9822	MSTRG.9822.1	2	+	542037	542659	623	1	Novel_lncRNA	Others(sense updown)	5.84	1.46	-2	5.9223e-10	yes
MSTRG.9826	MSTRG.9826.1	2	-	591858	592179	322	1	Novel_lncRNA	Others(sense updown)	7.26	2.48	-1.54963	4.50348e-05	yes
MSTRG.9839	MSTRG.9839.1	2	+	724592	725672	1081	1	Novel_lncRNA	Antisense LncRNAs	248.2	807.11	1.70126	0	yes
MSTRG.9844	MSTRG.9844.1	2	-	736449	736799	351	1	Novel_lncRNA	Intergenic LncRNAs	0	0.11	6.78136	1
MSTRG.9855	MSTRG.9855.1	2	-	807984	808200	217	1	Novel_lncRNA	Others(anti down),Others(sense updown)	2.25	0	-11.1357	0.00302028	yes
MSTRG.9911	MSTRG.9911.1	2	-	1194813	1196177	406	2	Novel_lncRNA	Intergenic LncRNAs	3.74	0.09	-5.37697	1.51832e-09	yes
MSTRG.9950	MSTRG.9950.1	2	+	1390486	1391507	722	4	Novel_lncRNA	Intergenic LncRNAs	30.75	1.47	-4.3867	1.1526e-122	yes
MSTRG.9951	MSTRG.9951.1	2	+	1392535	1393519	446	3	Novel_lncRNA	Others(anti down)	19.47	0.34	-5.83957	9.65237e-54	yes
MSTRG.9952	MSTRG.9952.1	2	+	1393620	1393824	205	1	Novel_lncRNA	Others(anti down),Others(sense updown)	6.88	0.18	-5.25634	5.76571e-09	yes
MSTRG.9971	MSTRG.9971.1	2	-	1520818	1521170	353	1	Novel_lncRNA	Intronic LncRNAs	2.46	0	-11.2644	1.6231e-05	yes
MSTRG.9979	MSTRG.9979.1	2	+	1578668	1578989	322	1	Novel_lncRNA	Antisense LncRNAs	5.06	0	-12.3049	7.792e-10	yes
MSTRG.9986	MSTRG.9986.1	2	-	1653714	1655041	381	2	Novel_lncRNA	Others(sense updown)	2.56	0	-11.3219	2.23847e-06	yes
MSTRG.9989	MSTRG.9989.1	2	-	1679622	1681278	1657	1	Novel_lncRNA	Antisense LncRNAs	4.95	1.37	-1.85325	3.5766e-19	yes
MSTRG.10006	MSTRG.10006.1	2	-	1808395	1811457	756	3	Novel_lncRNA	Others(lnc(mRNA))	0.36	3.3	3.1964	1.86224e-09	yes
MSTRG.10020	MSTRG.10020.1	2	-	1928361	1928584	224	1	Novel_lncRNA	Intergenic LncRNAs	3.88	0	-11.9218	1.6231e-05	yes
MSTRG.10021	MSTRG.10021.1	2	+	1928361	1928584	224	1	Novel_lncRNA	Intergenic LncRNAs	0.48	0	-8.90689	0.537283
MSTRG.10036	MSTRG.10036.1	2	+	2018152	2018370	219	1	Novel_lncRNA	Intergenic LncRNAs	1.24	0	-10.2761	0.0406196	yes
MSTRG.10043	MSTRG.10043.1	2	-	2120071	2120457	387	1	Novel_lncRNA	Intergenic LncRNAs	14.04	0.49	-4.84062	3.26471e-32	yes
MSTRG.10044	MSTRG.10044.1	2	+	2121133	2121411	279	1	Novel_lncRNA	Intergenic LncRNAs	1.95	0.27	-2.85244	0.00521537	yes
MSTRG.10046	MSTRG.10046.1	2	-	2124111	2124480	370	1	Novel_lncRNA	Antisense LncRNAs	3.96	0.41	-3.2718	3.47123e-07	yes
MSTRG.10048	MSTRG.10048.1	2	+	2169319	2169593	275	1	Novel_lncRNA	Intergenic LncRNAs	0.2	0	-7.64386	1
MSTRG.10050	MSTRG.10050.1	2	+	2173187	2173661	475	1	Novel_lncRNA	Intergenic LncRNAs	1.17	0.02	-5.87036	0.000820714	yes
MSTRG.10055	MSTRG.10055.1	2	-	2234851	2235273	423	1	Novel_lncRNA	Intergenic LncRNAs	2.13	0	-11.0566	8.46889e-06	yes
MSTRG.10066	MSTRG.10066.2	2	+	2313205	2315542	351	2	Novel_lncRNA	Sense LncRNAs	1.24	2.15	0.793997	0.284393
MSTRG.10072	MSTRG.10072.1	2	-	2339297	2339711	415	1	Novel_lncRNA	Intergenic LncRNAs	9.77	2.74	-1.83418	5.69143e-10	yes
MSTRG.10078	MSTRG.10078.1	2	+	2378011	2378875	419	4	Novel_lncRNA	Intronic LncRNAs	3.37	1.35	-1.31979	0.00446703	yes
MSTRG.10080	MSTRG.10080.2	2	-	2387214	2388419	449	4	Novel_lncRNA	Sense LncRNAs	0	0.62	9.27612	0.0406196	yes
MSTRG.10106	MSTRG.10106.1	2	+	2623682	2631084	2428	10	Novel_lncRNA	Sense LncRNAs	9.85	0.63	-3.9667	1.0011e-121	yes
MSTRG.10119	MSTRG.10119.2	2	+	2749530	2751891	2137	3	Novel_lncRNA	Antisense LncRNAs	3.09	0.11	-4.81203	1.6327e-39	yes
MSTRG.10134	MSTRG.10134.1	2	-	2821020	2821296	277	1	Novel_lncRNA	Intergenic LncRNAs	2.55	0	-11.3163	0.000115018	yes
MSTRG.10136	MSTRG.10136.1	2	+	2834297	2834780	484	1	Novel_lncRNA	Antisense LncRNAs	0.56	0.39	-0.521953	0.798998
MSTRG.10143	MSTRG.10143.1	2	-	2879139	2879605	467	1	Novel_lncRNA	Bidirectional LncRNAs	2.09	0.24	-3.1224	0.000124702	yes
MSTRG.10156	MSTRG.10156.4	2	-	2958970	2959189	220	1	Novel_lncRNA	Intronic LncRNAs	300.08	48.49	-2.62959	7.70001e-216	yes
MSTRG.10166	MSTRG.10166.1	2	-	2996471	2997194	724	1	Novel_lncRNA	Intergenic LncRNAs	12.37	326.54	4.72234	0	yes
MSTRG.10177	MSTRG.10177.1	2	-	3127676	3128009	314	2	Novel_lncRNA	Intergenic LncRNAs	0	1.69	10.7228	0.000820714	yes
MSTRG.10184	MSTRG.10184.1	2	+	3156659	3157046	388	1	Novel_lncRNA	Others(sense updown)	2.1	0.29	-2.85626	0.00121172	yes
MSTRG.10192	MSTRG.10192.1	2	-	3232350	3235996	3647	1	Novel_lncRNA	Antisense LncRNAs	3.91	0.01	-8.61102	2.94693e-87	yes
MSTRG.10196	MSTRG.10196.1	2	+	3302994	3307491	3434	2	Novel_lncRNA	Others(sense updown)	1.37	0.18	-2.92811	2.95375e-19	yes
MSTRG.10197	MSTRG.10197.1	2	-	3305545	3305888	344	1	Novel_lncRNA	Intergenic LncRNAs	2.52	0	-11.2992	1.6231e-05	yes
MSTRG.10199	MSTRG.10199.1	2	-	3312490	3314535	2046	1	Novel_lncRNA	Intergenic LncRNAs	2.63	0.46	-2.51536	3.06556e-18	yes
MSTRG.10206	MSTRG.10206.1	2	+	3372781	3373362	582	1	Novel_lncRNA	Intergenic LncRNAs	3.92	4.35	0.150162	0.894091
MSTRG.10220	MSTRG.10220.1	2	-	3481939	3482178	240	1	Novel_lncRNA	Intergenic LncRNAs	1.13	0	-10.1421	0.0406196	yes
MSTRG.10226	MSTRG.10226.1	2	+	3518654	3519164	371	2	Novel_lncRNA	Others(anti down)	0.73	0	-9.51175	0.0406196	yes
MSTRG.10233	MSTRG.10233.1	2	+	3587221	3591478	482	2	Novel_lncRNA	Intergenic LncRNAs	3.67	0	-11.8416	1.04848e-10	yes
MSTRG.10234	MSTRG.10234.1	2	-	3596661	3596874	214	1	Novel_lncRNA	Bidirectional LncRNAs	0.25	0	-7.96578	1
MSTRG.10248	MSTRG.10248.1	2	-	3747677	3749663	1561	3	Novel_lncRNA	Sense LncRNAs	2.75	0.41	-2.74574	2.56469e-16	yes
MSTRG.10255	MSTRG.10255.1	2	-	3782432	3782701	270	1	Novel_lncRNA	Antisense LncRNAs	1.61	0	-10.6528	0.00579257	yes
MSTRG.10257	MSTRG.10257.1	2	-	3788947	3789244	298	1	Novel_lncRNA	Antisense LncRNAs	0.18	1.27	2.81876	0.132794
MSTRG.10262	MSTRG.10262.1	2	-	3820913	3821194	282	1	Novel_lncRNA	Intergenic LncRNAs	1.15	0	-10.1674	0.0214131	yes
MSTRG.10263	MSTRG.10263.1	2	+	3825409	3827212	1623	2	Novel_lncRNA	Bidirectional LncRNAs	12.37	5.29	-1.22551	2.11073e-25	yes
MSTRG.10266	MSTRG.10266.1	2	-	3874674	3876649	1023	4	Novel_lncRNA	Intergenic LncRNAs	2.81	0.07	-5.32707	4.91482e-18	yes
MSTRG.10284	MSTRG.10284.1	2	+	4036981	4037319	339	1	Novel_lncRNA	Intergenic LncRNAs	4.99	0.22	-4.50346	1.80497e-09	yes
MSTRG.10285	MSTRG.10285.1	2	+	4037821	4038028	208	1	Novel_lncRNA	Intergenic LncRNAs	2.35	0	-11.1984	0.00302028	yes
MSTRG.10291	MSTRG.10291.1	2	-	4076455	4076675	221	1	Novel_lncRNA	Others(sense updown)	1.47	0	-10.5216	0.0214131	yes
MSTRG.10298	MSTRG.10298.2	2	-	4136473	4149930	1913	6	Novel_lncRNA	Antisense LncRNAs	1.91	2.87	0.587478	0.0244931
MSTRG.10333	MSTRG.10333.1	2	+	4516600	4571138	291	2	Novel_lncRNA	Sense LncRNAs	1.31	1.43	0.126448	1
MSTRG.10334	MSTRG.10334.1	2	-	4523401	4524079	679	1	Novel_lncRNA	Bidirectional LncRNAs	6.31	0	-12.6234	2.77242e-26	yes
MSTRG.10374	MSTRG.10374.1	2	-	4865629	4865923	295	1	Novel_lncRNA	Bidirectional LncRNAs	34.95	3.2	-3.44915	2.92498e-47	yes
MSTRG.10406	MSTRG.10406.1	2	-	5139210	5139425	216	1	Novel_lncRNA	Others(anti down)	1	0	-9.96578	0.07712
MSTRG.10409	MSTRG.10409.1	2	-	5153373	5154656	1284	1	Novel_lncRNA	Antisense LncRNAs	5.2	0.94	-2.46778	5.52233e-22	yes
MSTRG.10432	MSTRG.10432.1	2	+	5318509	5319295	325	2	Novel_lncRNA	Intergenic LncRNAs	1.84	0	-10.8455	0.000418506	yes
MSTRG.10441	MSTRG.10441.1	2	-	5397563	5397765	203	1	Novel_lncRNA	Intergenic LncRNAs	0.79	0	-9.62571	0.284393
MSTRG.10443	MSTRG.10443.1	2	+	5432400	5433881	374	2	Novel_lncRNA	Others(lnc(mRNA))	5.37	1.92	-1.48382	0.00018993	yes
MSTRG.10449	MSTRG.10449.1	2	-	5468511	5468802	292	1	Novel_lncRNA	Intergenic LncRNAs	0.93	0	-9.86109	0.0406196	yes
MSTRG.10453	MSTRG.10453.1	2	+	5535751	5538049	1171	3	Novel_lncRNA	Intergenic LncRNAs	1.76	0.03	-5.87447	4.84924e-13	yes
MSTRG.10454	MSTRG.10454.1	2	+	5542696	5543621	926	1	Novel_lncRNA	Sense LncRNAs	4.28	2	-1.09761	3.06843e-05	yes
MSTRG.10456	MSTRG.10456.1	2	-	5568528	5569215	688	1	Novel_lncRNA	Intergenic LncRNAs	1.81	0.05	-5.17792	8.36921e-08	yes
MSTRG.10461	MSTRG.10461.3	2	-	5593545	5594531	729	2	Novel_lncRNA	Sense LncRNAs	2.83	78.72	4.79786	5.74062e-257	yes
MSTRG.10466	MSTRG.10466.1	2	-	5656871	5657281	411	1	Novel_lncRNA	Others(sense updown)	0.13	2.48	4.25376	3.97131e-05	yes
MSTRG.10469	MSTRG.10469.1	2	-	5677204	5678880	424	2	Novel_lncRNA	Intergenic LncRNAs	1.15	0	-10.1674	0.00302028	yes
MSTRG.10470	MSTRG.10470.1	2	-	5688744	5693991	4109	2	Novel_lncRNA	Antisense LncRNAs	3.14	0.25	-3.65076	3.91248e-62	yes
MSTRG.10475	MSTRG.10475.1	2	+	5784623	5833880	348	3	Novel_lncRNA	Others(sense updown)	3.43	0.22	-3.96263	1.95625e-06	yes
MSTRG.10477	MSTRG.10477.1	2	+	5790743	5798366	7594	2	Novel_lncRNA	Intergenic LncRNAs	4.27	0.31	-3.7839	2.72218e-158	yes
MSTRG.10490	MSTRG.10490.1	2	-	5912883	5919495	1169	3	Novel_lncRNA	Antisense LncRNAs	0.31	0.77	1.31259	0.07712
MSTRG.10490	MSTRG.10490.2	2	-	5913456	5919834	1127	2	Novel_lncRNA	Others(anti down)	3.94	1.58	-1.31827	3.40924e-07	yes
MSTRG.10490	MSTRG.10490.3	2	-	5913857	5919495	391	2	Novel_lncRNA	Others(anti down)	4.89	5.52	0.174834	0.797935
MSTRG.10490	MSTRG.10490.4	2	-	5916826	5919834	1432	2	Novel_lncRNA	Others(sense updown)	2.14	0.1	-4.41954	1.02822e-17	yes
MSTRG.10498	MSTRG.10498.3	2	+	5994951	6000364	1377	3	Novel_lncRNA	Antisense LncRNAs	1.26	0.16	-2.97728	2.80795e-07	yes
MSTRG.10514	MSTRG.10514.1	2	+	6187115	6187389	275	1	Novel_lncRNA	Others(anti down)	448.36	176.78	-1.3427	8.51485e-164	yes
MSTRG.10515	MSTRG.10515.1	2	-	6187116	6187387	272	1	Novel_lncRNA	Others(sense updown)	4.99	0.28	-4.15554	1.6074e-07	yes
MSTRG.10533	MSTRG.10533.1	2	-	6423841	6424073	233	1	Novel_lncRNA	Antisense LncRNAs	0.7	0.49	-0.514573	0.730507
MSTRG.10539	MSTRG.10539.2	2	+	6512441	6517532	4922	3	Novel_lncRNA	Sense LncRNAs	5.09	1.79	-1.50771	4.01458e-42	yes
MSTRG.10540	MSTRG.10540.3	2	-	6518638	6522971	847	4	Novel_lncRNA	Antisense LncRNAs	1.73	0.75	-1.20581	0.00977201	yes
MSTRG.10558	MSTRG.10558.1	2	+	6750028	6750585	558	1	Novel_lncRNA	Bidirectional LncRNAs	1.85	0.88	-1.07195	0.045629	yes
MSTRG.10563	MSTRG.10563.2	2	-	6799925	6802656	651	3	Novel_lncRNA	Antisense LncRNAs	7.8	0.6	-3.70044	2.5185e-25	yes
MSTRG.10567	MSTRG.10567.1	2	+	6841741	6842006	266	1	Novel_lncRNA	Intergenic LncRNAs	7.4	0.41	-4.17383	3.76417e-11	yes
MSTRG.10571	MSTRG.10571.1	2	+	6930594	6931278	685	1	Novel_lncRNA	Intergenic LncRNAs	2.46	0.66	-1.89812	0.000125186	yes
MSTRG.10603	MSTRG.10603.1	2	-	7362906	7363224	268	2	Novel_lncRNA	Intergenic LncRNAs	0.07	0.42	2.58496	1
MSTRG.10635	MSTRG.10635.1	2	+	7864550	7865052	475	2	Novel_lncRNA	Others(sense updown)	3.54	0.96	-1.88264	0.000125186	yes
MSTRG.10638	MSTRG.10638.10	2	+	7884106	7901395	7602	5	Novel_lncRNA	Sense LncRNAs	18.67	1.66	-3.49147	0	yes
MSTRG.10645	MSTRG.10645.1	2	+	8034327	8035074	748	1	Novel_lncRNA	Others(sense updown)	15.81	0.35	-5.49734	1.74182e-73	yes
MSTRG.10646	MSTRG.10646.1	2	-	8034337	8035000	664	1	Novel_lncRNA	Bidirectional LncRNAs	26.57	10.53	-1.33529	1.50658e-25	yes
MSTRG.10665	MSTRG.10665.1	2	+	8283664	8284069	257	2	Novel_lncRNA	Intergenic LncRNAs	0.42	0.15	-1.48543	1
MSTRG.10672	MSTRG.10672.1	2	+	8369874	8370136	263	1	Novel_lncRNA	Intergenic LncRNAs	2.35	0	-11.1984	0.000418506	yes
MSTRG.10673	MSTRG.10673.1	2	-	8369874	8370138	265	1	Novel_lncRNA	Intergenic LncRNAs	4.3	0	-12.0701	6.10507e-07	yes
MSTRG.10674	MSTRG.10674.1	2	+	8371725	8371972	248	1	Novel_lncRNA	Intergenic LncRNAs	1.97	0	-10.944	0.00302028	yes
MSTRG.10675	MSTRG.10675.1	2	-	8371732	8372078	347	1	Novel_lncRNA	Intergenic LncRNAs	1.88	0	-10.8765	0.000219491	yes
MSTRG.10683	MSTRG.10683.1	2	-	8435695	8435928	234	1	Novel_lncRNA	Intergenic LncRNAs	19.43	0	-14.246	9.31297e-28	yes
MSTRG.10687	MSTRG.10687.1	2	+	8486853	8487244	372	2	Novel_lncRNA	Intergenic LncRNAs	5.25	0	-12.3581	7.16614e-12	yes
MSTRG.10688	MSTRG.10688.1	2	+	8524411	8524981	390	2	Novel_lncRNA	Antisense LncRNAs	0.7	0	-9.45121	0.0406196	yes
MSTRG.10729	MSTRG.10729.1	2	-	9155684	9157853	920	3	Novel_lncRNA	Sense LncRNAs	1.93	0.49	-1.97775	5.11096e-05	yes
MSTRG.10733	MSTRG.10733.1	2	-	9190075	9222549	209	2	Novel_lncRNA	Intergenic LncRNAs	0.52	0	-9.02237	0.537283
MSTRG.10762	MSTRG.10762.1	2	+	9615978	9616184	207	1	Novel_lncRNA	Intergenic LncRNAs	0.26	0	-8.02237	1
MSTRG.10764	MSTRG.10764.4	2	-	9657253	9660928	3556	3	Novel_lncRNA	Sense LncRNAs	3.02	0.36	-3.06848	7.11824e-44	yes
MSTRG.10768	MSTRG.10768.1	2	+	9805626	9805871	246	1	Novel_lncRNA	Intergenic LncRNAs	1.34	0	-10.388	0.0214131	yes
MSTRG.10774	MSTRG.10774.1	2	-	9850475	9850742	268	1	Novel_lncRNA	Others(sense updown)	4.86	0.85	-2.51542	3.96399e-05	yes
MSTRG.10775	MSTRG.10775.1	2	+	9850476	9850755	280	1	Novel_lncRNA	Others(anti down)	8.32	0	-13.0224	3.27731e-14	yes
MSTRG.10788	MSTRG.10788.1	2	-	10041275	10042102	828	1	Novel_lncRNA	Intergenic LncRNAs	1.11	1.37	0.303616	0.702119
MSTRG.10789	MSTRG.10789.1	2	-	10063426	10063836	411	1	Novel_lncRNA	Bidirectional LncRNAs	1.45	0.09	-4.00998	0.000418506	yes
MSTRG.10791	MSTRG.10791.1	2	-	10082862	10083315	454	1	Novel_lncRNA	Intergenic LncRNAs	11.36	9.58	-0.245865	0.174972
MSTRG.10792	MSTRG.10792.1	2	+	10082916	10083314	399	1	Novel_lncRNA	Intergenic LncRNAs	6.12	16.67	1.44565	4.83801e-09	yes
MSTRG.10800	MSTRG.10800.1	2	+	10165318	10166000	683	1	Novel_lncRNA	Intergenic LncRNAs	1.94	0.06	-5.01495	2.19753e-08	yes
MSTRG.10837	MSTRG.10837.1	2	+	10674921	10675597	677	1	Novel_lncRNA	Intergenic LncRNAs	2.11	1.76	-0.261668	0.479521
MSTRG.10842	MSTRG.10842.1	2	+	10810120	10810965	846	1	Novel_lncRNA	Intergenic LncRNAs	1.86	0.04	-5.53916	7.792e-10	yes
MSTRG.10843	MSTRG.10843.1	2	-	10811184	10811525	342	1	Novel_lncRNA	Intergenic LncRNAs	1.43	0	-10.4818	0.00302028	yes
MSTRG.10847	MSTRG.10847.1	2	-	10865652	10866941	627	2	Novel_lncRNA	Intergenic LncRNAs	2.98	0.34	-3.13171	9.36694e-09	yes
MSTRG.10848	MSTRG.10848.1	2	+	10867404	10867694	291	1	Novel_lncRNA	Intergenic LncRNAs	0.93	0	-9.86109	0.0406196	yes
MSTRG.10849	MSTRG.10849.1	2	-	10867425	10867686	262	1	Novel_lncRNA	Intergenic LncRNAs	1.04	0.14	-2.89308	0.14915
MSTRG.10850	MSTRG.10850.1	2	+	10873023	10873230	208	1	Novel_lncRNA	Intergenic LncRNAs	0.52	0	-9.02237	0.537283
MSTRG.10854	MSTRG.10854.1	2	-	10904619	10907065	2447	1	Novel_lncRNA	Antisense LncRNAs	2.02	0.39	-2.37281	3.92563e-16	yes
MSTRG.10855	MSTRG.10855.1	2	+	10921505	10922184	680	1	Novel_lncRNA	Intergenic LncRNAs	2.16	0	-11.0768	5.76571e-09	yes
MSTRG.10856	MSTRG.10856.1	2	+	10922923	10923155	233	1	Novel_lncRNA	Intergenic LncRNAs	0.33	0	-8.36632	0.537283
MSTRG.10861	MSTRG.10861.1	2	-	11017621	11017922	302	1	Novel_lncRNA	Intergenic LncRNAs	5.67	0	-12.4691	2.04946e-10	yes
MSTRG.10862	MSTRG.10862.1	2	+	11022008	11022244	237	1	Novel_lncRNA	Intergenic LncRNAs	0.94	0.16	-2.55459	0.25698
MSTRG.10866	MSTRG.10866.1	2	+	11040484	11041505	458	3	Novel_lncRNA	Bidirectional LncRNAs	11.49	5.37	-1.09738	1.21565e-06	yes
MSTRG.10867	MSTRG.10867.1	2	+	11044499	11044741	243	1	Novel_lncRNA	Others(sense updown)	2.01	0.62	-1.69686	0.0735304
MSTRG.10869	MSTRG.10869.1	2	+	11071550	11072141	592	1	Novel_lncRNA	Antisense LncRNAs	2.84	0.13	-4.44931	1.80497e-09	yes
MSTRG.10870	MSTRG.10870.1	2	-	11073639	11073948	310	1	Novel_lncRNA	Intergenic LncRNAs	9.05	1.15	-2.97628	1.09831e-11	yes
MSTRG.10881	MSTRG.10881.1	2	-	11230414	11230835	422	1	Novel_lncRNA	Intergenic LncRNAs	0.51	0.72	0.4975	0.819673
MSTRG.10884	MSTRG.10884.1	2	+	11259629	11259899	271	1	Novel_lncRNA	Intergenic LncRNAs	3.95	0	-11.9476	1.17037e-06	yes
MSTRG.10915	MSTRG.10915.1	2	-	11829994	11830283	290	1	Novel_lncRNA	Intergenic LncRNAs	2.25	0	-11.1357	0.000219491	yes
MSTRG.10916	MSTRG.10916.1	2	+	11841744	11841962	219	1	Novel_lncRNA	Intergenic LncRNAs	0.25	0	-7.96578	1
MSTRG.10921	MSTRG.10921.1	2	+	11876259	11878335	591	2	Novel_lncRNA	Intronic LncRNAs	1.38	0	-10.4305	3.11919e-05	yes
MSTRG.10927	MSTRG.10927.1	2	-	11953123	11953625	503	1	Novel_lncRNA	Intergenic LncRNAs	5.07	0.08	-5.98584	1.12863e-15	yes
MSTRG.10932	MSTRG.10932.1	2	+	12081477	12084324	1715	2	Novel_lncRNA	Intergenic LncRNAs	4.78	1.43	-1.741	1.12868e-17	yes
MSTRG.10936	MSTRG.10936.1	2	-	12129714	12129923	210	1	Novel_lncRNA	Intergenic LncRNAs	0.26	0	-8.02237	1
MSTRG.10937	MSTRG.10937.1	2	-	12130486	12131402	917	1	Novel_lncRNA	Intergenic LncRNAs	1.83	0.45	-2.02385	5.21008e-05	yes
MSTRG.10945	MSTRG.10945.1	2	-	12261961	12262270	310	1	Novel_lncRNA	Intergenic LncRNAs	2.8	0.24	-3.54432	0.000142755	yes
MSTRG.10955	MSTRG.10955.1	2	+	12379927	12380147	221	1	Novel_lncRNA	Intergenic LncRNAs	0.74	0	-9.53138	0.284393
MSTRG.10958	MSTRG.10958.1	2	+	12461627	12462201	575	1	Novel_lncRNA	Antisense LncRNAs	1.27	0.07	-4.18133	6.00341e-05	yes
MSTRG.10960	MSTRG.10960.1	2	+	12462780	12462993	214	1	Novel_lncRNA	Intronic LncRNAs	1.52	0	-10.5699	0.0214131	yes
MSTRG.10962	MSTRG.10962.1	2	-	12493401	12493787	387	1	Novel_lncRNA	Antisense LncRNAs	35.59	11.92	-1.57809	1.7035e-25	yes
MSTRG.10965	MSTRG.10965.3	2	+	12496870	12511647	3238	18	Novel_lncRNA	Sense LncRNAs	3.55	0.33	-3.42728	3.75126e-52	yes
MSTRG.10965	MSTRG.10965.2	2	+	12496870	12511647	3345	17	Novel_lncRNA	Sense LncRNAs	5.58	0.49	-3.50941	2.32345e-86	yes
MSTRG.10965	MSTRG.10965.1	2	+	12496870	12511647	3233	18	Novel_lncRNA	Sense LncRNAs	7.98	0.78	-3.35484	3.16437e-113	yes
MSTRG.10970	MSTRG.10970.1	2	+	12582820	12583044	225	1	Novel_lncRNA	Intergenic LncRNAs	0.48	0	-8.90689	0.537283
MSTRG.10973	MSTRG.10973.1	2	+	12607308	12607523	216	1	Novel_lncRNA	Intergenic LncRNAs	0.25	0	-7.96578	1
MSTRG.10975	MSTRG.10975.1	2	+	12650566	12652178	1613	1	Novel_lncRNA	Sense LncRNAs	2.36	0.42	-2.49033	4.52399e-13	yes
MSTRG.10977	MSTRG.10977.1	2	+	12719566	12719963	398	1	Novel_lncRNA	Intergenic LncRNAs	34.5	52.71	0.61148	2.1856e-06
MSTRG.10984	MSTRG.10984.1	2	-	12911765	12921804	569	2	Novel_lncRNA	Others(lnc(mRNA))	6.21	1.44	-2.10852	2.05028e-10	yes
MSTRG.10984	MSTRG.10984.3	2	-	12918594	12921776	713	2	Novel_lncRNA	Intronic LncRNAs	3.05	0.77	-1.98588	1.87411e-06	yes
MSTRG.10988	MSTRG.10988.3	2	+	12926241	12929124	2008	4	Novel_lncRNA	Antisense LncRNAs	2.19	0.42	-2.38247	1.91756e-14	yes
MSTRG.10988	MSTRG.10988.1	2	+	12926241	12929124	2023	4	Novel_lncRNA	Antisense LncRNAs	5.22	0.07	-6.22055	5.92767e-65	yes
MSTRG.10991	MSTRG.10991.1	2	+	12943958	12945083	945	2	Novel_lncRNA	Others(sense updown),Others(sense updown)	4.42	0.48	-3.20294	2.04109e-18	yes
MSTRG.10998	MSTRG.10998.1	2	-	13065370	13065606	237	1	Novel_lncRNA	Intergenic LncRNAs	0.23	0.32	0.476438	1
MSTRG.11003	MSTRG.11003.1	2	-	13138948	13139226	279	1	Novel_lncRNA	Intergenic LncRNAs	4.08	0	-11.9944	6.10507e-07	yes
MSTRG.11006	MSTRG.11006.1	2	-	13161768	13162003	236	1	Novel_lncRNA	Antisense LncRNAs	4.37	0	-12.0934	2.23847e-06	yes
MSTRG.11012	MSTRG.11012.1	2	-	13309288	13309610	323	1	Novel_lncRNA	Intergenic LncRNAs	1.54	0	-10.5887	0.00157708	yes
MSTRG.11014	MSTRG.11014.1	2	+	13338777	13339801	1025	1	Novel_lncRNA	Intergenic LncRNAs	2.21	3.26	0.560826	0.111054
MSTRG.11031	MSTRG.11031.1	2	+	13361079	13361520	442	1	Novel_lncRNA	Bidirectional LncRNAs	450.52	2058.94	2.19224	0	yes
MSTRG.11037	MSTRG.11037.1	2	+	13365056	13366365	1129	2	Novel_lncRNA	Antisense LncRNAs	5.65	1.44	-1.97218	2.71644e-16	yes
MSTRG.11037	MSTRG.11037.2	2	+	13365056	13366365	1129	2	Novel_lncRNA	Antisense LncRNAs	5.65	1.44	-1.97218	2.71644e-16	yes
MSTRG.11039	MSTRG.11039.1	2	+	13385513	13385769	257	1	Novel_lncRNA	Intergenic LncRNAs	0.63	0.29	-1.1193	0.730507
MSTRG.11045	MSTRG.11045.1	2	+	13467638	13467870	233	1	Novel_lncRNA	Intergenic LncRNAs	2.97	0	-11.5362	0.000115018	yes
MSTRG.11046	MSTRG.11046.1	2	-	13547657	13548703	1047	1	Novel_lncRNA	Intergenic LncRNAs	1.51	0.21	-2.84609	1.49309e-06	yes
MSTRG.11051	MSTRG.11051.1	2	-	13777288	13777681	394	1	Novel_lncRNA	Intergenic LncRNAs	1.1	0.19	-2.53343	0.0290932	yes
MSTRG.11052	MSTRG.11052.1	2	-	13780457	13780725	269	1	Novel_lncRNA	Intergenic LncRNAs	0.4	0	-8.64386	0.537283
MSTRG.11053	MSTRG.11053.1	2	+	13875754	13879401	3648	1	Novel_lncRNA	Intergenic LncRNAs	5.3	1.88	-1.49526	1.91286e-32	yes
MSTRG.11054	MSTRG.11054.1	2	-	13919199	13919675	477	1	Novel_lncRNA	Intergenic LncRNAs	1.71	0	-10.7398	3.11919e-05	yes
MSTRG.11055	MSTRG.11055.1	2	-	13933443	13937692	2858	2	Novel_lncRNA	Sense LncRNAs	3.44	0.55	-2.64491	5.51129e-35	yes
MSTRG.11055	MSTRG.11055.3	2	-	13934809	13937692	1046	4	Novel_lncRNA	Sense LncRNAs	4.72	1.79	-1.39883	2.7764e-08	yes
MSTRG.11059	MSTRG.11059.1	2	-	13978612	13979163	552	1	Novel_lncRNA	Antisense LncRNAs	5.41	0.21	-4.68717	3.88734e-17	yes
MSTRG.11064	MSTRG.11064.1	2	+	14008292	14009410	1011	3	Novel_lncRNA	Intergenic LncRNAs	9.18	0.07	-7.035	5.49815e-57	yes
MSTRG.11065	MSTRG.11065.1	2	+	14009637	14010245	530	2	Novel_lncRNA	Others(anti down)	0.41	0.07	-2.5502	0.25698
MSTRG.11066	MSTRG.11066.1	2	+	14010425	14010701	277	1	Novel_lncRNA	Others(anti down)	2.74	0	-11.42	6.00341e-05	yes
MSTRG.11068	MSTRG.11068.1	2	+	14040001	14040386	386	1	Novel_lncRNA	Intergenic LncRNAs	1.1	3.02	1.45705	0.016181	yes
MSTRG.11085	MSTRG.11085.2	2	-	14439695	14442764	2683	3	Novel_lncRNA	Sense LncRNAs	8.04	1.77	-2.18345	1.56844e-59	yes
MSTRG.11088	MSTRG.11088.1	2	+	14450268	14450675	408	1	Novel_lncRNA	Antisense LncRNAs	5.19	0.74	-2.81014	1.28717e-08	yes
MSTRG.11097	MSTRG.11097.1	2	+	14505936	14508289	759	3	Novel_lncRNA	Sense LncRNAs	3.58	2.24	-0.676461	0.0255499
MSTRG.11099	MSTRG.11099.1	2	+	14527860	14528360	501	1	Novel_lncRNA	Intergenic LncRNAs	3.45	0	-11.7524	1.04848e-10	yes
MSTRG.11126	MSTRG.11126.1	2	+	14758221	14761228	1502	3	Novel_lncRNA	Sense LncRNAs	5.43	0.95	-2.51495	8.52524e-28	yes
MSTRG.11131	MSTRG.11131.1	2	+	14837446	14837722	277	1	Novel_lncRNA	Intergenic LncRNAs	7.25	1.5	-2.27302	1.70881e-06	yes
MSTRG.11132	MSTRG.11132.1	2	-	14837455	14837727	273	1	Novel_lncRNA	Intergenic LncRNAs	7.35	0	-12.8435	3.66857e-12	yes
MSTRG.11148	MSTRG.11148.1	2	-	15089784	15090045	262	1	Novel_lncRNA	Bidirectional LncRNAs	1.45	0.29	-2.32193	0.0501844
MSTRG.11151	MSTRG.11151.1	2	-	15130757	15131270	514	1	Novel_lncRNA	Intergenic LncRNAs	1.69	0.22	-2.94145	0.000393234	yes
MSTRG.11163	MSTRG.11163.1	2	-	15363540	15363845	306	1	Novel_lncRNA	Others(sense updown)	3.37	0.37	-3.18715	7.0502e-05	yes
MSTRG.11177	MSTRG.11177.1	2	+	15548766	15550069	485	2	Novel_lncRNA	Intergenic LncRNAs	1.57	0	-10.6165	6.00341e-05	yes
MSTRG.11178	MSTRG.11178.1	2	-	15550510	15550895	386	1	Novel_lncRNA	Intergenic LncRNAs	1.27	0	-10.3106	0.00302028	yes
MSTRG.11179	MSTRG.11179.1	2	+	15550597	15550898	302	1	Novel_lncRNA	Intergenic LncRNAs	0.54	0	-9.07682	0.284393
MSTRG.11180	MSTRG.11180.1	2	+	15552569	15552779	211	1	Novel_lncRNA	Intergenic LncRNAs	0.26	0	-8.02237	1
MSTRG.11187	MSTRG.11187.1	2	-	15599355	15600003	649	1	Novel_lncRNA	Others(sense updown)	0.5	1.16	1.21412	0.131101
MSTRG.11194	MSTRG.11194.1	2	-	15711276	15711854	579	1	Novel_lncRNA	Intergenic LncRNAs	0.66	1.57	1.25023	0.07712
MSTRG.11196	MSTRG.11196.1	2	+	15750022	15750230	209	1	Novel_lncRNA	Intergenic LncRNAs	1.56	0	-10.6073	0.0214131	yes
MSTRG.11200	MSTRG.11200.1	2	+	15842376	15871800	240	2	Novel_lncRNA	Intergenic LncRNAs	0.5	0.51	0.0285692	1
MSTRG.11202	MSTRG.11202.1	2	-	15971915	15972189	275	1	Novel_lncRNA	Others(sense updown)	2.17	0	-11.0835	0.000418506	yes
MSTRG.11223	MSTRG.11223.1	2	-	16393563	16394548	515	2	Novel_lncRNA	Intergenic LncRNAs	0.53	0.07	-2.92057	0.14915
MSTRG.11228	MSTRG.11228.1	2	-	16495068	16495774	707	1	Novel_lncRNA	Intergenic LncRNAs	3.76	10.64	1.50069	7.23727e-11	yes
MSTRG.11233	MSTRG.11233.1	2	-	16583744	16584189	446	1	Novel_lncRNA	Intergenic LncRNAs	2.04	0.26	-2.97199	0.000393234	yes
MSTRG.11234	MSTRG.11234.1	2	-	16621600	16622952	1353	1	Novel_lncRNA	Intergenic LncRNAs	1.9	1.66	-0.194816	0.488778
MSTRG.11235	MSTRG.11235.1	2	+	16630946	16631158	213	1	Novel_lncRNA	Intergenic LncRNAs	1.27	0.35	-1.8594	0.14915
MSTRG.11243	MSTRG.11243.1	2	+	16748685	16749091	407	1	Novel_lncRNA	Intergenic LncRNAs	3.3	0.09	-5.1964	2.19753e-08	yes
MSTRG.11257	MSTRG.11257.1	2	-	16919855	16931467	523	2	Novel_lncRNA	Antisense LncRNAs	19.4	1.01	-4.26363	1.96204e-55	yes
MSTRG.11264	MSTRG.11264.1	2	-	16999595	16999848	254	1	Novel_lncRNA	Intergenic LncRNAs	6.03	0.15	-5.32912	1.51832e-09	yes
MSTRG.11265	MSTRG.11265.1	2	+	16999595	16999876	282	1	Novel_lncRNA	Intergenic LncRNAs	5.4	0.26	-4.37638	2.3319e-08	yes
MSTRG.11267	MSTRG.11267.1	2	+	17042885	17043357	473	1	Novel_lncRNA	Intergenic LncRNAs	3.56	0.08	-5.47573	1.04848e-10	yes
MSTRG.11268	MSTRG.11268.1	2	-	17043007	17043358	352	1	Novel_lncRNA	Intergenic LncRNAs	2.62	0.11	-4.57399	4.31054e-06	yes
MSTRG.11275	MSTRG.11275.1	2	+	17101417	17101931	515	1	Novel_lncRNA	Intergenic LncRNAs	2	0.44	-2.18442	0.000893827	yes
MSTRG.11281	MSTRG.11281.1	2	+	17213417	17235990	399	2	Novel_lncRNA	Bidirectional LncRNAs	5.44	2.45	-1.15082	0.00212895	yes
MSTRG.11299	MSTRG.11299.1	2	+	17612577	17612788	212	1	Novel_lncRNA	Intergenic LncRNAs	1.39	0	-10.4409	0.0406196	yes
MSTRG.11307	MSTRG.11307.1	2	+	17732556	17733433	878	1	Novel_lncRNA	Intergenic LncRNAs	0.19	0.99	2.38143	0.00400671	yes
MSTRG.11312	MSTRG.11312.1	2	-	17780478	17781000	523	1	Novel_lncRNA	Antisense LncRNAs	4.98	0	-12.2819	5.75172e-16	yes
MSTRG.11313	MSTRG.11313.1	2	+	17782961	17784234	1274	1	Novel_lncRNA	Intergenic LncRNAs	1.62	0	-10.6618	9.53511e-13	yes
MSTRG.11319	MSTRG.11319.1	2	-	17855147	17855434	288	1	Novel_lncRNA	Intergenic LncRNAs	0.38	0	-8.56986	0.537283
MSTRG.11326	MSTRG.11326.1	2	-	17934003	17934303	301	1	Novel_lncRNA	Others(sense updown)	0.43	0	-8.74819	0.284393
MSTRG.11332	MSTRG.11332.1	2	-	18013716	18014291	576	1	Novel_lncRNA	Intergenic LncRNAs	3.3	0.07	-5.55897	7.16614e-12	yes
MSTRG.11343	MSTRG.11343.1	2	+	18114979	18115782	674	2	Novel_lncRNA	Intergenic LncRNAs	2.25	0	-11.1357	2.96042e-09	yes
MSTRG.11354	MSTRG.11354.1	2	+	18241748	18242063	276	2	Novel_lncRNA	Bidirectional LncRNAs	0.79	0.55	-0.522421	0.771216
MSTRG.11355	MSTRG.11355.1	2	-	18241762	18242062	261	2	Novel_lncRNA	Others(sense updown)	0.21	0	-7.71425	1
MSTRG.11356	MSTRG.11356.1	2	-	18242425	18242625	201	1	Novel_lncRNA	Intergenic LncRNAs	0.82	0	-9.67948	0.14915
MSTRG.11357	MSTRG.11357.1	2	-	18243192	18243444	253	1	Novel_lncRNA	Intergenic LncRNAs	6.44	0.3	-4.42403	3.41875e-09	yes
MSTRG.11358	MSTRG.11358.1	2	+	18243192	18243444	253	1	Novel_lncRNA	Intergenic LncRNAs	1.07	0.15	-2.83458	0.14915
MSTRG.11367	MSTRG.11367.1	2	+	18364936	18365263	328	1	Novel_lncRNA	Intergenic LncRNAs	1170.51	2082.14	0.83093	2.47564e-157
MSTRG.11368	MSTRG.11368.1	2	-	18364939	18365261	323	1	Novel_lncRNA	Intergenic LncRNAs	7.56	0.94	-3.00765	2.30402e-10	yes
MSTRG.11381	MSTRG.11381.1	2	+	18473908	18709130	470	2	Novel_lncRNA	Antisense LncRNAs	24.94	0.8	-4.96232	4.19669e-71	yes
MSTRG.11417	MSTRG.11417.1	2	+	18856570	18857080	511	1	Novel_lncRNA	Intergenic LncRNAs	2.44	0	-11.2527	1.62126e-07	yes
MSTRG.11421	MSTRG.11421.1	2	-	18919746	18921190	1445	1	Novel_lncRNA	Intergenic LncRNAs	1.16	0.24	-2.27302	6.4557e-06	yes
MSTRG.11436	MSTRG.11436.1	2	-	19052230	19052516	287	1	Novel_lncRNA	Intergenic LncRNAs	1.61	0.13	-3.63048	0.016613	yes
MSTRG.11439	MSTRG.11439.1	2	-	19167866	19173468	868	2	Novel_lncRNA	Intergenic LncRNAs	1.75	0.22	-2.99178	1.06212e-06	yes
MSTRG.11442	MSTRG.11442.1	2	+	19271508	19271773	266	1	Novel_lncRNA	Intergenic LncRNAs	4.21	0.24	-4.13271	3.60039e-06	yes
MSTRG.11444	MSTRG.11444.1	2	+	19280831	19283919	2020	5	Novel_lncRNA	Sense LncRNAs	4.63	1.74	-1.41192	4.70301e-15	yes
MSTRG.11468	MSTRG.11468.1	2	+	19611533	19612076	544	1	Novel_lncRNA	Others(sense updown)	1.9	0	-10.8918	2.23847e-06	yes
MSTRG.11490	MSTRG.11490.1	2	+	19835220	19837156	1910	2	Novel_lncRNA	Intergenic LncRNAs	2.93	0.89	-1.71902	2.50515e-12	yes
MSTRG.11516	MSTRG.11516.1	2	-	20115572	20115911	340	1	Novel_lncRNA	Intergenic LncRNAs	3.32	0.33	-3.33065	2.22797e-05	yes
MSTRG.11518	MSTRG.11518.1	2	-	20151718	20152004	287	1	Novel_lncRNA	Intergenic LncRNAs	2.84	0.4	-2.82782	0.00121172	yes
MSTRG.11519	MSTRG.11519.1	2	+	20151736	20151971	236	1	Novel_lncRNA	Intergenic LncRNAs	8.59	0	-13.0684	1.87722e-12	yes
MSTRG.11548	MSTRG.11548.1	2	+	20386140	20386369	230	1	Novel_lncRNA	Intergenic LncRNAs	5.9	0.49	-3.58986	1.16729e-06	yes
MSTRG.11549	MSTRG.11549.1	2	+	20413073	20413394	322	1	Novel_lncRNA	Intergenic LncRNAs	31.85	0	-14.959	1.3538e-62	yes
MSTRG.11581	MSTRG.11581.1	2	+	20806245	20807450	1206	1	Novel_lncRNA	Intergenic LncRNAs	0.72	0	-9.49185	1.6231e-05	yes
MSTRG.11583	MSTRG.11583.1	2	-	20815710	20816090	381	1	Novel_lncRNA	Others(anti down)	2.22	0.2	-3.47249	0.000142755	yes
MSTRG.11591	MSTRG.11591.1	2	-	20897147	20897444	298	1	Novel_lncRNA	Intergenic LncRNAs	8.33	0.13	-6.00173	4.34492e-15	yes
MSTRG.11592	MSTRG.11592.1	2	+	20897222	20897440	219	1	Novel_lncRNA	Intergenic LncRNAs	0	0.17	7.40939	1
MSTRG.11594	MSTRG.11594.1	2	-	20898595	20899040	446	1	Novel_lncRNA	Antisense LncRNAs	2.8	0	-11.4512	1.62126e-07	yes
MSTRG.11595	MSTRG.11595.1	2	-	20913403	20913934	532	1	Novel_lncRNA	Intergenic LncRNAs	0.92	0.07	-3.71621	0.00302028	yes
MSTRG.11603	MSTRG.11603.1	2	-	21004033	21010681	2168	4	Novel_lncRNA	Antisense LncRNAs	2.68	7.29	1.44369	4.26291e-20	yes
MSTRG.11632	MSTRG.11632.1	2	+	21235944	21236378	435	1	Novel_lncRNA	Antisense LncRNAs	0	1.39	10.4409	0.000219491	yes
MSTRG.11634	MSTRG.11634.1	2	-	21249379	21249633	255	1	Novel_lncRNA	Intergenic LncRNAs	7.45	0	-12.863	1.39673e-11	yes
MSTRG.11635	MSTRG.11635.1	2	-	21273580	21273829	250	1	Novel_lncRNA	Intergenic LncRNAs	334.08	0.15	-11.121	0	yes
MSTRG.11636	MSTRG.11636.1	2	+	21273588	21273923	336	1	Novel_lncRNA	Intergenic LncRNAs	0.32	0	-8.32193	0.537283
MSTRG.11641	MSTRG.11641.1	2	+	21349458	21349680	223	1	Novel_lncRNA	Intergenic LncRNAs	0.97	0	-9.92184	0.07712
MSTRG.11654	MSTRG.11654.3	2	+	21489855	21492883	1203	4	Novel_lncRNA	Sense LncRNAs	0.14	1.69	3.59352	7.31667e-09	yes
MSTRG.11659	MSTRG.11659.1	2	+	21542174	21542377	204	1	Novel_lncRNA	Bidirectional LncRNAs	0.27	1.11	2.03953	0.25698
MSTRG.11661	MSTRG.11661.1	2	+	21552335	21553062	703	2	Novel_lncRNA	Others(sense updown)	0.31	26.62	6.4241	3.98044e-98	yes
MSTRG.11662	MSTRG.11662.1	2	-	21552497	21552750	229	2	Novel_lncRNA	Others(anti down)	0	0.66	9.36632	0.284393
MSTRG.11666	MSTRG.11666.2	2	+	21573084	21575777	954	2	Novel_lncRNA	Sense LncRNAs	2.62	0.86	-1.60716	1.31697e-05	yes
MSTRG.11681	MSTRG.11681.1	2	+	21680924	21681221	298	1	Novel_lncRNA	Antisense LncRNAs	2.19	0	-11.0967	0.000219491	yes
MSTRG.11686	MSTRG.11686.1	2	-	21738872	21739469	598	1	Novel_lncRNA	Intergenic LncRNAs	1.18	0.06	-4.29768	0.000115018	yes
MSTRG.11707	MSTRG.11707.3	2	+	21893103	21901183	1747	4	Novel_lncRNA	Sense LncRNAs	3.91	0.43	-3.18476	2.36448e-29	yes
MSTRG.11710	MSTRG.11710.1	2	-	21917496	21918042	547	1	Novel_lncRNA	Intergenic LncRNAs	1.34	0.24	-2.48113	0.00211068	yes
MSTRG.11712	MSTRG.11712.1	2	-	21927825	21928125	301	1	Novel_lncRNA	Antisense LncRNAs	3.08	0.13	-4.56635	4.31054e-06	yes
MSTRG.11714	MSTRG.11714.1	2	-	21963414	21963910	318	2	Novel_lncRNA	Sense LncRNAs	3.41	0.83	-2.03859	0.00151539	yes
MSTRG.11728	MSTRG.11728.1	2	+	22139409	22141344	1936	1	Novel_lncRNA	Sense LncRNAs	2.83	0.98	-1.52995	2.54799e-10	yes
MSTRG.11748	MSTRG.11748.1	2	-	22292756	22293772	1017	1	Novel_lncRNA	Sense LncRNAs	31.8	8.29	-1.93958	1.05882e-75	yes
MSTRG.11751	MSTRG.11751.1	2	-	22349158	22349720	563	1	Novel_lncRNA	Intergenic LncRNAs	2.6	0.13	-4.32193	4.41706e-08	yes
MSTRG.11763	MSTRG.11763.2	2	+	22435374	22437519	702	3	Novel_lncRNA	Sense LncRNAs	1.51	0.92	-0.714843	0.158337
MSTRG.11763	MSTRG.11763.3	2	+	22437771	22439624	570	4	Novel_lncRNA	Sense LncRNAs	32.68	25.11	-0.380146	0.00010383
MSTRG.11765	MSTRG.11765.1	2	-	22456285	22476231	6127	13	Novel_lncRNA	Antisense LncRNAs	9.83	0.51	-4.26862	4.5324368158448e-314
MSTRG.11766	MSTRG.11766.1	2	-	22462178	22462691	514	1	Novel_lncRNA	Intergenic LncRNAs	3.91	0.22	-4.15159	1.96532e-11	yes
MSTRG.11801	MSTRG.11801.1	2	-	22819637	22852630	427	3	Novel_lncRNA	Sense LncRNAs	1.12	0.09	-3.63743	0.016613	yes
MSTRG.11801	MSTRG.11801.11	2	-	22865568	22866891	350	4	Novel_lncRNA	Sense LncRNAs	1.96	0	-10.9366	0.000115018	yes
MSTRG.11807	MSTRG.11807.1	2	-	22883215	22883500	286	1	Novel_lncRNA	Others(sense updown)	2.83	0	-11.4666	3.11919e-05	yes
MSTRG.11816	MSTRG.11816.1	2	+	22976175	22976789	535	2	Novel_lncRNA	Intergenic LncRNAs	18.97	79.07	2.05941	1.78062e-84	yes
MSTRG.11822	MSTRG.11822.1	2	-	23013140	23014344	1205	1	Novel_lncRNA	Sense LncRNAs	1.89	0	-10.8842	6.42263e-14	yes
MSTRG.11845	MSTRG.11845.1	2	+	23179920	23180450	531	1	Novel_lncRNA	Intergenic LncRNAs	1.64	0.07	-4.5502	1.6231e-05	yes
MSTRG.11846	MSTRG.11846.1	2	+	23182307	23182920	614	1	Novel_lncRNA	Antisense LncRNAs	7.07	0.74	-3.25611	3.29928e-19	yes
MSTRG.11847	MSTRG.11847.1	2	+	23209999	23210476	478	1	Novel_lncRNA	Intergenic LncRNAs	0.34	0	-8.40939	0.284393
MSTRG.11849	MSTRG.11849.1	2	-	23233433	23233732	300	1	Novel_lncRNA	Intergenic LncRNAs	10.13	1.26	-3.00714	5.8924e-13	yes
MSTRG.11854	MSTRG.11854.1	2	+	23293714	23294557	844	1	Novel_lncRNA	Intergenic LncRNAs	438.25	328.73	-0.414851	1.276e-51
MSTRG.11855	MSTRG.11855.1	2	-	23293733	23293963	231	1	Novel_lncRNA	Intergenic LncRNAs	0.47	0	-8.87652	0.537283
MSTRG.11856	MSTRG.11856.1	2	-	23294267	23294509	243	1	Novel_lncRNA	Intergenic LncRNAs	0.22	0	-7.78136	1
MSTRG.11871	MSTRG.11871.1	2	+	23417282	23417524	243	1	Novel_lncRNA	Intergenic LncRNAs	0.45	0	-8.81378	0.537283
MSTRG.11895	MSTRG.11895.1	2	-	23713479	23713694	216	1	Novel_lncRNA	Antisense LncRNAs	0	0.18	7.49185	1
MSTRG.11903	MSTRG.11903.1	2	+	23772227	23772855	534	2	Novel_lncRNA	Others(anti down)	0.91	2.9	1.67211	0.00264629	yes
MSTRG.11940	MSTRG.11940.1	2	-	24059252	24061170	1919	1	Novel_lncRNA	Antisense LncRNAs	1.84	0.28	-2.71621	2.01373e-13	yes
MSTRG.11960	MSTRG.11960.1	2	+	24271034	24271746	532	2	Novel_lncRNA	Others(sense updown)	1.53	0	-10.5793	3.11919e-05	yes
MSTRG.11963	MSTRG.11963.2	2	-	24286255	24291431	1638	6	Novel_lncRNA	Sense LncRNAs	5.45	0.39	-3.80471	6.5776e-45	yes
MSTRG.11963	MSTRG.11963.1	2	-	24286255	24291431	1237	3	Novel_lncRNA	Sense LncRNAs	7.65	0.06	-6.99435	3.61957e-58	yes
MSTRG.11967	MSTRG.11967.1	2	-	24330536	24330808	273	1	Novel_lncRNA	Bidirectional LncRNAs	0.99	0.55	-0.847997	0.544753
MSTRG.11977	MSTRG.11977.1	2	-	24429607	24431061	1435	2	Novel_lncRNA	Antisense LncRNAs	1.4	0	-10.4512	3.66857e-12	yes
MSTRG.11991	MSTRG.11991.2	2	+	24565839	24567638	1309	2	Novel_lncRNA	Sense LncRNAs	25.71	18.7	-0.459291	1.24903e-09
MSTRG.11992	MSTRG.11992.1	2	-	24567344	24567647	304	1	Novel_lncRNA	Intronic LncRNAs	0.18	0	-7.49185	1
MSTRG.12000	MSTRG.12000.1	2	+	24640379	24640624	246	1	Novel_lncRNA	Others(sense updown)	8.16	2.92	-1.4826	0.00018993	yes
MSTRG.12029	MSTRG.12029.5	2	-	24868601	24870920	785	2	Novel_lncRNA	Sense LncRNAs	2.43	1.61	-0.593896	0.111729
MSTRG.12032	MSTRG.12032.1	2	-	24878601	24879146	546	1	Novel_lncRNA	Intergenic LncRNAs	0.42	0	-8.71425	0.07712
MSTRG.12034	MSTRG.12034.3	2	+	24905493	24907596	829	3	Novel_lncRNA	Sense LncRNAs	2.77	0.52	-2.4133	7.88691e-08	yes
MSTRG.12037	MSTRG.12037.1	2	-	24943621	24943826	206	1	Novel_lncRNA	Intergenic LncRNAs	1.05	0	-10.0362	0.07712
MSTRG.12056	MSTRG.12056.1	2	+	25155258	25155728	471	1	Novel_lncRNA	Intergenic LncRNAs	3.57	0.24	-3.89482	1.80497e-09	yes
MSTRG.12061	MSTRG.12061.1	2	+	25216205	25222654	1721	2	Novel_lncRNA	Antisense LncRNAs	6.1	0.71	-3.10292	2.35967e-43	yes
MSTRG.12065	MSTRG.12065.2	2	-	25234104	25237416	1774	5	Novel_lncRNA	Sense LncRNAs	12.73	1.07	-3.57255	5.55277e-106	yes
MSTRG.12086	MSTRG.12086.2	2	-	25356796	25357441	465	2	Novel_lncRNA	Sense LncRNAs	2.33	1.95	-0.256856	0.581583
MSTRG.12107	MSTRG.12107.1	2	+	25526377	25527355	901	2	Novel_lncRNA	Intergenic LncRNAs	1.26	0	-10.2992	6.10507e-07	yes
MSTRG.12116	MSTRG.12116.1	2	+	25605471	25605880	410	1	Novel_lncRNA	Intergenic LncRNAs	1.28	0.38	-1.75207	0.0735304
MSTRG.12154	MSTRG.12154.1	2	-	25998168	25998406	239	1	Novel_lncRNA	Intergenic LncRNAs	3.84	0.79	-2.28118	0.00082166	yes
MSTRG.12164	MSTRG.12164.1	2	+	26089314	26089533	220	1	Novel_lncRNA	Intergenic LncRNAs	0.25	0	-7.96578	1
MSTRG.12165	MSTRG.12165.1	2	-	26090565	26090846	282	1	Novel_lncRNA	Intergenic LncRNAs	1.92	0	-10.9069	0.00157708	yes
MSTRG.12169	MSTRG.12169.1	2	-	26117796	26118105	310	1	Novel_lncRNA	Intergenic LncRNAs	1.93	0	-10.9144	0.000418506	yes
MSTRG.12180	MSTRG.12180.1	2	-	26201927	26210212	1898	6	Novel_lncRNA	Antisense LncRNAs	4.93	0.54	-3.19056	5.29369e-40	yes
MSTRG.12196	MSTRG.12196.2	2	-	26343881	26349008	1500	2	Novel_lncRNA	Sense LncRNAs	3.12	0.18	-4.11548	5.90778e-25	yes
MSTRG.12216	MSTRG.12216.1	2	-	26543582	26544417	258	2	Novel_lncRNA	Intergenic LncRNAs	0.63	0	-9.29921	0.284393
MSTRG.12217	MSTRG.12217.1	2	-	26547195	26547493	299	1	Novel_lncRNA	Intergenic LncRNAs	2.35	0	-11.1984	0.000115018	yes
MSTRG.12218	MSTRG.12218.1	2	-	26550112	26550389	278	1	Novel_lncRNA	Intergenic LncRNAs	0.2	0	-7.64386	1
MSTRG.12219	MSTRG.12219.1	2	-	26552234	26552516	283	1	Novel_lncRNA	Intergenic LncRNAs	3.32	0	-11.697	4.31054e-06	yes
MSTRG.12224	MSTRG.12224.1	2	+	26594242	26594677	369	2	Novel_lncRNA	Intergenic LncRNAs	2.94	3.48	0.243271	0.829666
MSTRG.12225	MSTRG.12225.1	2	-	26597487	26597778	292	1	Novel_lncRNA	Intergenic LncRNAs	2.92	0	-11.5118	1.6231e-05	yes
MSTRG.12233	MSTRG.12233.4	2	+	26652528	26659559	2995	9	Novel_lncRNA	Sense LncRNAs	20.87	1.7	-3.61782	1.06215e-283	yes
MSTRG.12233	MSTRG.12233.3	2	+	26652528	26659559	3123	9	Novel_lncRNA	Sense LncRNAs	30.45	1.61	-4.24131	0	yes
MSTRG.12242	MSTRG.12242.1	2	-	26731441	26752985	561	2	Novel_lncRNA	Intronic LncRNAs	19.15	3.71	-2.36785	2.41885e-33	yes
MSTRG.12258	MSTRG.12258.1	2	+	26848185	26848548	267	2	Novel_lncRNA	Others(sense updown)	1.41	0.92	-0.615989	0.621703
MSTRG.12273	MSTRG.12273.1	2	-	26958549	26958861	313	1	Novel_lncRNA	Intergenic LncRNAs	3.29	0.36	-3.19202	7.0502e-05	yes
MSTRG.12277	MSTRG.12277.1	2	-	27015225	27015525	301	1	Novel_lncRNA	Intergenic LncRNAs	6.49	0	-12.664	7.16614e-12	yes
MSTRG.12288	MSTRG.12288.1	2	+	27115850	27116428	579	1	Novel_lncRNA	Intergenic LncRNAs	0.78	0.13	-2.58496	0.016613	yes
MSTRG.12289	MSTRG.12289.1	2	-	27117999	27118251	253	1	Novel_lncRNA	Intergenic LncRNAs	1.07	0	-10.0634	0.0406196	yes
MSTRG.12360	MSTRG.12360.1	2	-	27745273	27745506	234	1	Novel_lncRNA	Antisense LncRNAs	0.5	0	-8.96578	0.284393
MSTRG.12380	MSTRG.12380.1	2	-	27898981	27899282	302	1	Novel_lncRNA	Intergenic LncRNAs	4.22	0	-12.043	8.36921e-08	yes
MSTRG.12381	MSTRG.12381.1	2	+	27899012	27899861	800	2	Novel_lncRNA	Intergenic LncRNAs	7.5	0.43	-4.12448	1.06339e-31	yes
MSTRG.12404	MSTRG.12404.1	2	+	28060053	28060416	364	1	Novel_lncRNA	Intergenic LncRNAs	1.49	0	-10.5411	0.00157708	yes
MSTRG.12410	MSTRG.12410.1	2	-	28125416	28125929	368	2	Novel_lncRNA	Intergenic LncRNAs	1.82	0.31	-2.5536	0.0061894	yes
MSTRG.12411	MSTRG.12411.1	2	+	28130673	28131220	548	1	Novel_lncRNA	Others(anti down)	1.19	0	-10.2167	0.000219491	yes
MSTRG.12432	MSTRG.12432.1	2	-	28258999	28259280	282	1	Novel_lncRNA	Intergenic LncRNAs	4.71	0.36	-3.70966	3.01019e-07	yes
MSTRG.12471	MSTRG.12471.1	2	-	28521191	28526790	1871	4	Novel_lncRNA	Antisense LncRNAs	4.96	0.95	-2.38434	1.84204e-29	yes
MSTRG.12486	MSTRG.12486.1	2	-	28629938	28630263	326	1	Novel_lncRNA	Antisense LncRNAs	0.33	0.12	-1.45943	1
MSTRG.12512	MSTRG.12512.1	2	-	28809250	28810010	761	1	Novel_lncRNA	Intergenic LncRNAs	0.29	1.24	2.09622	0.00874805	yes
MSTRG.12523	MSTRG.12523.1	2	+	28976617	28976845	229	1	Novel_lncRNA	Intergenic LncRNAs	1.42	0	-10.4717	0.0214131	yes
MSTRG.12530	MSTRG.12530.1	2	+	29035662	29036602	941	1	Novel_lncRNA	Others(sense updown)	0.58	1.93	1.73448	0.00090292	yes
MSTRG.12565	MSTRG.12565.3	2	+	29349660	29358011	723	2	Novel_lncRNA	Sense LncRNAs	12.85	9.98	-0.364657	0.00816232
MSTRG.12569	MSTRG.12569.1	2	-	29392383	29392649	267	1	Novel_lncRNA	Intergenic LncRNAs	2.44	0	-11.2527	0.000219491	yes
MSTRG.12571	MSTRG.12571.2	2	+	29463135	29465813	2434	3	Novel_lncRNA	Sense LncRNAs	3.21	1.61	-0.995513	5.02982e-08
MSTRG.12622	MSTRG.12622.1	2	-	29929750	29930036	287	1	Novel_lncRNA	Intergenic LncRNAs	1.89	0	-10.8842	0.00157708	yes
MSTRG.12633	MSTRG.12633.1	2	+	29990544	29990765	222	1	Novel_lncRNA	Intergenic LncRNAs	0.49	0	-8.93664	0.537283
MSTRG.12646	MSTRG.12646.1	2	+	30079699	30080253	555	1	Novel_lncRNA	Intronic LncRNAs	6.91	0.41	-4.07499	4.96536e-21	yes
MSTRG.12654	MSTRG.12654.1	2	-	30137018	30137389	372	1	Novel_lncRNA	Intergenic LncRNAs	9.77	0.51	-4.25979	6.76982e-20	yes
MSTRG.12658	MSTRG.12658.1	2	+	30148387	30148611	225	1	Novel_lncRNA	Bidirectional LncRNAs	1.69	0.17	-3.31342	0.0501844
MSTRG.12662	MSTRG.12662.2	2	-	30166409	30170129	1624	9	Novel_lncRNA	Sense LncRNAs	3.95	0.75	-2.39689	8.02942e-21	yes
MSTRG.12707	MSTRG.12707.1	2	-	30625589	30626389	801	1	Novel_lncRNA	Others(sense updown)	1.36	0.19	-2.83954	0.000164548	yes
MSTRG.12710	MSTRG.12710.1	2	-	30633310	30633717	271	2	Novel_lncRNA	Intergenic LncRNAs	0.2	0	-7.64386	1
MSTRG.12749	MSTRG.12749.1	2	-	31128299	31131773	813	4	Novel_lncRNA	Others(lnc(mRNA))	4.27	2.42	-0.819229	0.00256121
MSTRG.12751	MSTRG.12751.1	2	+	31133586	31134241	475	2	Novel_lncRNA	Sense LncRNAs	1.49	0.4	-1.89724	0.0262699	yes
MSTRG.12752	MSTRG.12752.1	2	-	31143925	31144195	271	1	Novel_lncRNA	Others(anti down)	1	0.14	-2.8365	0.14915
MSTRG.12787	MSTRG.12787.1	2	-	31492198	31492649	452	1	Novel_lncRNA	Intergenic LncRNAs	1.68	0.17	-3.30485	0.000469508	yes
MSTRG.12788	MSTRG.12788.1	2	+	31492226	31492440	215	1	Novel_lncRNA	Intergenic LncRNAs	1.01	0	-9.98014	0.07712
MSTRG.12793	MSTRG.12793.1	2	+	31533312	31533550	239	1	Novel_lncRNA	Intergenic LncRNAs	40.03	95.87	1.26	6.71178e-23	yes
MSTRG.12794	MSTRG.12794.1	2	-	31533313	31533548	236	1	Novel_lncRNA	Intergenic LncRNAs	4.83	0.32	-3.91588	3.60039e-06	yes
MSTRG.12824	MSTRG.12824.1	2	-	31833503	31835842	2118	3	Novel_lncRNA	Antisense LncRNAs	3.67	0.61	-2.5889	7.69984e-27	yes
MSTRG.12824	MSTRG.12824.2	2	-	31833604	31835842	829	4	Novel_lncRNA	Antisense LncRNAs	2.35	0.58	-2.01854	7.72818e-06	yes
MSTRG.12826	MSTRG.12826.1	2	+	31840365	31840726	362	1	Novel_lncRNA	Intergenic LncRNAs	12.29	0.31	-5.30907	9.31297e-28	yes
MSTRG.12843	MSTRG.12843.1	2	-	31972848	31974344	1497	1	Novel_lncRNA	Antisense LncRNAs	1.22	0.03	-5.34577	1.39673e-11	yes
MSTRG.12843	MSTRG.12843.2	2	-	31972851	31974344	551	2	Novel_lncRNA	Antisense LncRNAs	8.61	2.59	-1.73306	1.12047e-10	yes
MSTRG.12859	MSTRG.12859.1	2	-	32133927	32134304	378	1	Novel_lncRNA	Intronic LncRNAs	1.66	0.1	-4.05311	0.000418506	yes
MSTRG.12873	MSTRG.12873.1	2	+	32243590	32244256	646	2	Novel_lncRNA	Intergenic LncRNAs	0.34	0.35	0.0418202	1
MSTRG.12875	MSTRG.12875.1	2	-	32252562	32252785	224	1	Novel_lncRNA	Intergenic LncRNAs	0.48	0	-8.90689	0.537283
MSTRG.12885	MSTRG.12885.1	2	+	32299748	32300893	479	2	Novel_lncRNA	Intronic LncRNAs	10.08	0.39	-4.69188	1.98914e-28	yes
MSTRG.12889	MSTRG.12889.1	2	+	32315150	32316752	1603	1	Novel_lncRNA	Intergenic LncRNAs	8.19	0.05	-7.35579	1.60647e-80	yes
MSTRG.12890	MSTRG.12890.3	2	+	32340783	32343144	562	3	Novel_lncRNA	Sense LncRNAs	3.4	1.34	-1.3433	0.000790244	yes
MSTRG.12902	MSTRG.12902.1	2	+	32417304	32418454	1129	2	Novel_lncRNA	Intergenic LncRNAs	3.32	0.03	-6.79008	4.87e-23	yes
MSTRG.12903	MSTRG.12903.1	2	+	32418505	32418844	340	1	Novel_lncRNA	Intergenic LncRNAs	0.16	0	-7.32193	1
MSTRG.12904	MSTRG.12904.1	2	+	32419527	32420323	797	1	Novel_lncRNA	Intergenic LncRNAs	1.97	0.09	-4.45213	1.22897e-08	yes
MSTRG.12905	MSTRG.12905.1	2	+	32420629	32421575	679	2	Novel_lncRNA	Intergenic LncRNAs	1.28	0.06	-4.41504	1.6231e-05	yes
MSTRG.12906	MSTRG.12906.1	2	-	32422377	32425664	1772	2	Novel_lncRNA	Intergenic LncRNAs	1.9	0.9	-1.078	0.000177345	yes
MSTRG.12910	MSTRG.12910.2	2	+	32452920	32455338	1178	2	Novel_lncRNA	Sense LncRNAs	6.04	2.05	-1.55892	2.07264e-13	yes
MSTRG.12933	MSTRG.12933.1	2	-	32664769	32665614	846	1	Novel_lncRNA	Antisense LncRNAs	0.83	2.68	1.69105	0.000239917	yes
MSTRG.12947	MSTRG.12947.1	2	+	32793511	32793832	322	1	Novel_lncRNA	Intergenic LncRNAs	2.23	0.12	-4.21594	0.000115018	yes
MSTRG.12948	MSTRG.12948.1	2	-	32801154	32801377	224	1	Novel_lncRNA	Intergenic LncRNAs	0.48	0	-8.90689	0.537283
MSTRG.12949	MSTRG.12949.1	2	-	32809935	32810192	258	1	Novel_lncRNA	Bidirectional LncRNAs	4.63	0.15	-4.94798	1.62126e-07	yes
MSTRG.12996	MSTRG.12996.4	2	+	33163652	33163883	232	1	Novel_lncRNA	Sense LncRNAs	1.17	0.33	-1.82597	0.14915
MSTRG.13032	MSTRG.13032.2	2	-	33411876	33414262	724	4	Novel_lncRNA	Antisense LncRNAs	13.72	24.44	0.832964	2.96042e-09
MSTRG.13046	MSTRG.13046.1	2	+	33504277	33504542	266	1	Novel_lncRNA	Intronic LncRNAs	0	0.43	8.74819	0.284393
MSTRG.13048	MSTRG.13048.1	2	-	33513887	33516127	2116	2	Novel_lncRNA	Others(sense updown)	16.57	0.2	-6.37243	4.15594e-214	yes
MSTRG.13050	MSTRG.13050.1	2	+	33518800	33519030	231	1	Novel_lncRNA	Bidirectional LncRNAs	0.94	0	-9.87652	0.07712
MSTRG.13073	MSTRG.13073.1	2	-	33676174	33679066	612	2	Novel_lncRNA	Intergenic LncRNAs	2.48	0.49	-2.33949	3.03534e-05	yes
MSTRG.13138	MSTRG.13138.3	3	+	156570	160701	3942	2	Novel_lncRNA	Sense LncRNAs	3.44	0.96	-1.8413	6.46565e-31	yes
MSTRG.13143	MSTRG.13143.1	3	+	223920	224613	615	2	Novel_lncRNA	Antisense LncRNAs	1.76	0	-10.7814	1.17037e-06	yes
MSTRG.13146	MSTRG.13146.1	3	+	242247	242593	347	1	Novel_lncRNA	Intronic LncRNAs	2.36	0.44	-2.42321	0.00239213	yes
MSTRG.13192	MSTRG.13192.1	3	+	565590	565941	281	2	Novel_lncRNA	Intergenic LncRNAs	3.48	0	-11.7649	2.23847e-06	yes
MSTRG.13193	MSTRG.13193.1	3	-	566409	570912	1551	3	Novel_lncRNA	Sense LncRNAs	9.06	1.44	-2.65344	1.84007e-49	yes
MSTRG.13249	MSTRG.13249.2	3	+	993829	1011304	1923	3	Novel_lncRNA	Antisense LncRNAs	1.69	0.02	-6.40088	4.31452e-20	yes
MSTRG.13269	MSTRG.13269.1	3	+	1170179	1170439	261	1	Novel_lncRNA	Intergenic LncRNAs	1.13	0	-10.1421	0.0406196	yes
MSTRG.13282	MSTRG.13282.1	3	+	1272101	1284386	525	2	Novel_lncRNA	Bidirectional LncRNAs	1.03	0	-10.0084	0.00157708	yes
MSTRG.13301	MSTRG.13301.2	3	+	1412662	1413826	1067	2	Novel_lncRNA	Antisense LncRNAs	3.61	1.81	-0.996009	0.000187393
MSTRG.13304	MSTRG.13304.1	3	+	1434835	1435278	444	1	Novel_lncRNA	Antisense LncRNAs	0.61	0.85	0.478654	0.836082
MSTRG.13335	MSTRG.13335.1	3	+	1660553	1660953	401	1	Novel_lncRNA	Others(sense updown),Others(anti down)	1.08	0	-10.0768	0.00579257	yes
MSTRG.13336	MSTRG.13336.1	3	-	1660765	1661035	271	1	Novel_lncRNA	Bidirectional LncRNAs	1	0	-9.96578	0.0406196	yes
MSTRG.13342	MSTRG.13342.1	3	+	1695821	1696342	522	1	Novel_lncRNA	Antisense LncRNAs	5.74	0	-12.4868	2.50941e-18	yes
MSTRG.13372	MSTRG.13372.1	3	+	1874453	1874902	450	1	Novel_lncRNA	Others(sense updown)	115.9	58.8	-0.978993	4.15999e-44
MSTRG.13395	MSTRG.13395.1	3	+	2100658	2101417	760	1	Novel_lncRNA	Antisense LncRNAs	0.64	3.33	2.37938	2.8713e-07	yes
MSTRG.13398	MSTRG.13398.1	3	+	2114330	2114870	438	2	Novel_lncRNA	Intergenic LncRNAs	3.22	0.35	-3.20163	6.30093e-07	yes
MSTRG.13403	MSTRG.13403.1	3	+	2155949	2159092	3144	1	Novel_lncRNA	Intergenic LncRNAs	8.98	1.3	-2.7882	1.46327e-102	yes
MSTRG.13405	MSTRG.13405.1	3	-	2166054	2166599	546	1	Novel_lncRNA	Antisense LncRNAs	0.89	0	-9.79766	0.00302028	yes
MSTRG.13425	MSTRG.13425.1	3	+	2307028	2307597	570	1	Novel_lncRNA	Bidirectional LncRNAs	1.14	2.65	1.21696	0.0290932	yes
MSTRG.13469	MSTRG.13469.1	3	+	2678571	2678845	275	1	Novel_lncRNA	Others(sense updown)	2.17	0	-11.0835	0.000418506	yes
MSTRG.13502	MSTRG.13502.1	3	+	2936673	2936897	225	1	Novel_lncRNA	Intergenic LncRNAs	5.07	0.17	-4.89838	3.15374e-07	yes
MSTRG.13503	MSTRG.13503.1	3	-	2936673	2936888	216	1	Novel_lncRNA	Intergenic LncRNAs	0.25	0	-7.96578	1
MSTRG.13506	MSTRG.13506.1	3	-	2939562	2939787	226	1	Novel_lncRNA	Antisense LncRNAs	9.12	8.03	-0.183634	0.553625
MSTRG.13508	MSTRG.13508.1	3	+	2942048	2942307	260	1	Novel_lncRNA	Intergenic LncRNAs	2.3	0	-11.1674	0.000418506	yes
MSTRG.13527	MSTRG.13527.1	3	+	3132754	3137505	4752	1	Novel_lncRNA	Antisense LncRNAs	11.31	0.4	-4.82146	2.96508e-308	yes
MSTRG.13544	MSTRG.13544.1	3	-	3292309	3292541	233	1	Novel_lncRNA	Intergenic LncRNAs	0.23	0	-7.84549	1
MSTRG.13599	MSTRG.13599.2	3	+	3686616	3689934	2811	5	Novel_lncRNA	Sense LncRNAs	3.11	5.22	0.747135	1.26536e-06
MSTRG.13603	MSTRG.13603.1	3	+	3701585	3706968	395	2	Novel_lncRNA	Others(lnc(mRNA))	149.48	125.56	-0.251576	8.88713e-07
MSTRG.13637	MSTRG.13637.1	3	+	3964430	3964677	248	1	Novel_lncRNA	Antisense LncRNAs	0.44	1.52	1.7885	0.265994
MSTRG.13645	MSTRG.13645.2	3	-	4013808	4014302	284	3	Novel_lncRNA	Antisense LncRNAs	0.19	0	-7.56986	1
MSTRG.13652	MSTRG.13652.1	3	-	4045526	4046062	537	1	Novel_lncRNA	Intergenic LncRNAs	3.4	0	-11.7313	2.73364e-11	yes
MSTRG.13683	MSTRG.13683.1	3	+	4283891	4284479	589	1	Novel_lncRNA	Antisense LncRNAs	7.92	0.71	-3.47961	6.35812e-22	yes
MSTRG.13686	MSTRG.13686.1	3	+	4289779	4290109	331	1	Novel_lncRNA	Others(anti down)	2432.62	206.49	-3.55837	0	yes
MSTRG.13723	MSTRG.13723.1	3	-	4596180	4603770	716	3	Novel_lncRNA	Antisense LncRNAs	1.74	0.05	-5.12102	8.36921e-08	yes
MSTRG.13724	MSTRG.13724.1	3	+	4609606	4609840	235	1	Novel_lncRNA	Intergenic LncRNAs	323.31	3.38	-6.57975	0	yes
MSTRG.13725	MSTRG.13725.1	3	-	4609609	4609836	228	1	Novel_lncRNA	Intergenic LncRNAs	0.24	0	-7.90689	1
MSTRG.13726	MSTRG.13726.1	3	-	4610704	4614857	305	3	Novel_lncRNA	Others(sense updown)	548.39	504.7	-0.119776	5.4357e-06
MSTRG.13727	MSTRG.13727.1	3	+	4610710	4614775	217	3	Novel_lncRNA	Others(anti down)	0.75	0.35	-1.09954	0.730507
MSTRG.13741	MSTRG.13741.1	3	-	4771334	4772745	1392	2	Novel_lncRNA	Intergenic LncRNAs	3.79	3.96	0.0633026	1
MSTRG.13741	MSTRG.13741.2	3	-	4771338	4772386	1049	1	Novel_lncRNA	Intergenic LncRNAs	0.14	0.15	0.0995357	1
MSTRG.13744	MSTRG.13744.3	3	+	4788030	4792053	2830	2	Novel_lncRNA	Sense LncRNAs	2.57	0.99	-1.37627	9.28909e-12	yes
MSTRG.13744	MSTRG.13744.2	3	+	4788030	4792053	3425	2	Novel_lncRNA	Sense LncRNAs	3.14	1.31	-1.2612	8.62864e-15	yes
MSTRG.13756	MSTRG.13756.1	3	-	4887278	4888034	757	1	Novel_lncRNA	Antisense LncRNAs	1.36	0.05	-4.76553	1.17037e-06	yes
MSTRG.13773	MSTRG.13773.1	3	-	4974590	4975454	865	1	Novel_lncRNA	Antisense LncRNAs	9.29	0.26	-5.1591	3.39988e-50	yes
MSTRG.13850	MSTRG.13850.1	3	+	5507203	5507515	313	1	Novel_lncRNA	Intergenic LncRNAs	1.91	0	-10.8994	0.000418506	yes
MSTRG.13898	MSTRG.13898.2	3	-	5934642	5935709	1068	1	Novel_lncRNA	Sense LncRNAs	2.34	0.74	-1.66091	1.31697e-05	yes
MSTRG.13901	MSTRG.13901.1	3	+	5957773	5958256	484	1	Novel_lncRNA	Others(anti down)	1.91	0.08	-4.57743	4.31054e-06	yes
MSTRG.13906	MSTRG.13906.1	3	+	5991937	5993506	702	2	Novel_lncRNA	Others(sense updown)	3.48	0.75	-2.21412	1.62126e-07	yes
MSTRG.13920	MSTRG.13920.1	3	-	6124408	6124625	218	1	Novel_lncRNA	Intergenic LncRNAs	0.25	0	-7.96578	1
MSTRG.13930	MSTRG.13930.1	3	+	6214418	6214650	233	1	Novel_lncRNA	Others(anti down)	3.52	0.16	-4.45943	3.11919e-05	yes
MSTRG.13940	MSTRG.13940.1	3	-	6280064	6280804	357	2	Novel_lncRNA	Intronic LncRNAs	3.95	0.21	-4.23339	8.38076e-08	yes
MSTRG.13945	MSTRG.13945.1	3	-	6333742	6334380	639	1	Novel_lncRNA	Intergenic LncRNAs	13.64	0.49	-4.79892	5.16774e-51	yes
MSTRG.13947	MSTRG.13947.2	3	+	6350071	6353481	3196	3	Novel_lncRNA	Intergenic LncRNAs	0	10.44	13.3498	4.3218e-186	yes
MSTRG.13947	MSTRG.13947.1	3	+	6350071	6353282	2286	3	Novel_lncRNA	Intergenic LncRNAs	114.19	17.09	-2.74021	0	yes
MSTRG.13947	MSTRG.13947.3	3	+	6350125	6353056	2719	3	Novel_lncRNA	Intergenic LncRNAs	155.88	24.73	-2.6561	0	yes
MSTRG.13952	MSTRG.13952.1	3	+	6397633	6397901	269	1	Novel_lncRNA	Intergenic LncRNAs	0.2	0	-7.64386	1
MSTRG.13958	MSTRG.13958.1	3	+	6478585	6484975	2847	2	Novel_lncRNA	Intergenic LncRNAs	0.4	1.66	2.05311	2.33728e-10	yes
MSTRG.13967	MSTRG.13967.1	3	+	6621517	6621745	229	1	Novel_lncRNA	Intergenic LncRNAs	1.9	0	-10.8918	0.00579257	yes
MSTRG.14011	MSTRG.14011.1	3	-	6980801	6982176	1347	2	Novel_lncRNA	Others(sense updown)	2.58	0.36	-2.8413	7.83455e-14	yes
MSTRG.14012	MSTRG.14012.2	3	-	6982465	6985083	1421	6	Novel_lncRNA	Sense LncRNAs	2.55	0.41	-2.6368	1.5726e-13	yes
MSTRG.14020	MSTRG.14020.1	3	+	7022027	7022275	249	1	Novel_lncRNA	Antisense LncRNAs	0.87	0	-9.76487	0.07712
MSTRG.14032	MSTRG.14032.1	3	+	7124492	7124744	253	1	Novel_lncRNA	Others(anti down)	0.43	1.31	1.60716	0.388093
MSTRG.14047	MSTRG.14047.1	3	+	7255391	7257607	2217	1	Novel_lncRNA	Bidirectional LncRNAs	0	1.04	10.0224	5.52997e-14	yes
MSTRG.14073	MSTRG.14073.1	3	+	7505403	7506023	621	1	Novel_lncRNA	Others(anti down)	3.41	0.18	-4.2437	5.38153e-12	yes
MSTRG.14098	MSTRG.14098.1	3	-	7704403	7704716	287	2	Novel_lncRNA	Antisense LncRNAs	1.51	0	-10.5603	0.00579257	yes
MSTRG.14099	MSTRG.14099.1	3	-	7704857	7705101	245	1	Novel_lncRNA	Others(anti down)	1.11	0	-10.1163	0.0406196	yes
MSTRG.14101	MSTRG.14101.1	3	+	7712179	7712688	510	1	Novel_lncRNA	Intergenic LncRNAs	3.69	0.07	-5.72012	7.16614e-12	yes
MSTRG.14102	MSTRG.14102.1	3	-	7712325	7712663	339	1	Novel_lncRNA	Intergenic LncRNAs	22.04	3.46	-2.67128	3.08003e-27	yes
MSTRG.14117	MSTRG.14117.1	3	+	7876670	7876961	292	1	Novel_lncRNA	Intergenic LncRNAs	1.86	0	-10.8611	0.00157708	yes
MSTRG.14120	MSTRG.14120.1	3	-	7910853	7911195	343	1	Novel_lncRNA	Intergenic LncRNAs	6.19	0.11	-5.81436	2.47938e-13	yes
MSTRG.14122	MSTRG.14122.1	3	+	7927509	7927747	239	1	Novel_lncRNA	Intergenic LncRNAs	3.63	0.16	-4.50383	1.6231e-05	yes
MSTRG.14134	MSTRG.14134.1	3	-	8010507	8011083	577	1	Novel_lncRNA	Antisense LncRNAs	1.98	0.33	-2.58496	9.60117e-05	yes
MSTRG.14142	MSTRG.14142.1	3	-	8105619	8105932	314	1	Novel_lncRNA	Antisense LncRNAs	7.55	0.12	-5.97537	8.55277e-15	yes
MSTRG.14144	MSTRG.14144.1	3	-	8106597	8107601	376	2	Novel_lncRNA	Antisense LncRNAs	5.1	0	-12.3163	7.16614e-12	yes
MSTRG.14146	MSTRG.14146.1	3	+	8107105	8107316	212	1	Novel_lncRNA	Intronic LncRNAs	0.26	0	-8.02237	1
MSTRG.14152	MSTRG.14152.1	3	-	8183115	8187727	3691	4	Novel_lncRNA	Sense LncRNAs	11.4	1.08	-3.39993	1.13125e-184	yes
MSTRG.14153	MSTRG.14153.1	3	+	8185963	8186491	529	1	Novel_lncRNA	Antisense LncRNAs	1.54	0.07	-4.45943	3.11919e-05	yes
MSTRG.14200	MSTRG.14200.1	3	-	8486295	8486536	242	1	Novel_lncRNA	Others(sense updown)	1.57	0	-10.6165	0.0111518	yes
MSTRG.14204	MSTRG.14204.1	3	+	8538755	8539000	246	1	Novel_lncRNA	Intergenic LncRNAs	0.66	0	-9.36632	0.284393
MSTRG.14216	MSTRG.14216.1	3	+	8646264	8646510	247	1	Novel_lncRNA	Others(anti down)	4.81	0	-12.2318	3.15374e-07	yes
MSTRG.14229	MSTRG.14229.1	3	+	8711584	8712430	847	1	Novel_lncRNA	Bidirectional LncRNAs	6.02	0.49	-3.61891	2.3141e-24	yes
MSTRG.14244	MSTRG.14244.1	3	-	8807693	8807913	221	1	Novel_lncRNA	Intergenic LncRNAs	1.23	0	-10.2644	0.0406196	yes
MSTRG.14245	MSTRG.14245.1	3	+	8808177	8808453	277	1	Novel_lncRNA	Intergenic LncRNAs	0.98	0	-9.93664	0.0406196	yes
MSTRG.14253	MSTRG.14253.1	3	+	8888751	8889095	345	1	Novel_lncRNA	Intergenic LncRNAs	16.01	0.44	-5.18533	1.4931e-34	yes
MSTRG.14289	MSTRG.14289.1	3	-	9175386	9175613	228	1	Novel_lncRNA	Others(sense updown)	2.14	0	-11.0634	0.00302028	yes
MSTRG.14290	MSTRG.14290.1	3	+	9175387	9175630	244	1	Novel_lncRNA	Others(anti down)	7.34	0.46	-3.99607	4.98345e-10	yes
MSTRG.14306	MSTRG.14306.1	3	+	9298408	9298817	410	1	Novel_lncRNA	Intergenic LncRNAs	1.72	0.09	-4.25634	0.000115018	yes
MSTRG.14319	MSTRG.14319.1	3	-	9419191	9419555	365	1	Novel_lncRNA	Antisense LncRNAs	5.95	0.62	-3.26255	2.47767e-10	yes
MSTRG.14330	MSTRG.14330.1	3	+	9486172	9486459	288	1	Novel_lncRNA	Intergenic LncRNAs	3.28	0.21	-3.96523	4.26473e-05	yes
MSTRG.14336	MSTRG.14336.1	3	-	9534053	9534361	309	1	Novel_lncRNA	Bidirectional LncRNAs	6.65	0.61	-3.44647	8.34392e-10	yes
MSTRG.14361	MSTRG.14361.1	3	+	9746223	9746786	564	1	Novel_lncRNA	Intergenic LncRNAs	4.31	0.13	-5.0511	2.2179e-15	yes
MSTRG.14362	MSTRG.14362.1	3	-	9746294	9746799	506	1	Novel_lncRNA	Intergenic LncRNAs	9.63	0	-13.2333	7.97464e-30	yes
MSTRG.14380	MSTRG.14380.1	3	-	9909706	9915213	4409	7	Novel_lncRNA	Others(sense updown),Others(sense updown)	28.89	2.7	-3.41954	0	yes
MSTRG.14415	MSTRG.14415.1	3	+	10168816	10169020	205	1	Novel_lncRNA	Intergenic LncRNAs	0.79	0	-9.62571	0.284393
MSTRG.14426	MSTRG.14426.1	3	+	10239284	10239789	506	1	Novel_lncRNA	Bidirectional LncRNAs	1.18	6.05	2.35815	2.62449e-08	yes
MSTRG.14440	MSTRG.14440.1	3	+	10333815	10337232	508	4	Novel_lncRNA	Sense LncRNAs	3.74	0.97	-1.94698	1.25726e-05	yes
MSTRG.14457	MSTRG.14457.1	3	-	10556916	10557175	260	1	Novel_lncRNA	Antisense LncRNAs	0.42	0.58	0.465664	1
MSTRG.14461	MSTRG.14461.1	3	-	10575966	10576521	556	1	Novel_lncRNA	Others(sense updown)	165.93	30.6	-2.43897	1.72709e-268	yes
MSTRG.14475	MSTRG.14475.1	3	+	10671619	10671857	239	1	Novel_lncRNA	Others(anti down)	2.27	0	-11.1485	0.00157708	yes
MSTRG.14489	MSTRG.14489.1	3	-	10800021	10800325	305	1	Novel_lncRNA	Intergenic LncRNAs	28.83	8.92	-1.69246	2.28605e-18	yes
MSTRG.14502	MSTRG.14502.1	3	-	10967478	10967681	204	1	Novel_lncRNA	Intergenic LncRNAs	0.11	0	-6.78136	1
MSTRG.14533	MSTRG.14533.1	3	-	11339506	11339901	396	1	Novel_lncRNA	Others(sense updown)	2.51	0	-11.2935	2.23847e-06	yes
MSTRG.14553	MSTRG.14553.1	3	+	11479707	11480078	372	1	Novel_lncRNA	Intergenic LncRNAs	3.94	0.2	-4.30012	4.41706e-08	yes
MSTRG.14554	MSTRG.14554.1	3	-	11479741	11480081	341	1	Novel_lncRNA	Intergenic LncRNAs	6.37	0.22	-4.85572	1.26434e-13	yes
MSTRG.14571	MSTRG.14571.2	3	+	11669030	11694285	352	2	Novel_lncRNA	Sense LncRNAs	5.35	2.25	-1.24961	0.00206045	yes
MSTRG.14580	MSTRG.14580.1	3	+	11831141	11831562	422	1	Novel_lncRNA	Intergenic LncRNAs	1.03	0	-10.0084	0.00579257	yes
MSTRG.14581	MSTRG.14581.1	3	+	11832477	11834116	461	2	Novel_lncRNA	Sense LncRNAs	3.46	4.37	0.336861	0.543381
MSTRG.14617	MSTRG.14617.2	3	+	12170596	12173828	2760	2	Novel_lncRNA	Sense LncRNAs	5.66	0.29	-4.28668	1.00748e-84	yes
MSTRG.14621	MSTRG.14621.1	3	+	12198934	12200656	250	2	Novel_lncRNA	Others(sense updown),Others(sense updown)	4.34	0	-12.0835	1.17037e-06	yes
MSTRG.14677	MSTRG.14677.1	3	+	12569078	12569316	239	1	Novel_lncRNA	Intergenic LncRNAs	0.68	0.16	-2.08746	0.421081
MSTRG.14699	MSTRG.14699.1	3	-	12798951	12799790	840	1	Novel_lncRNA	Intergenic LncRNAs	16.6	0	-14.0189	6.45448e-85	yes
MSTRG.14703	MSTRG.14703.1	3	+	12827685	12828193	509	1	Novel_lncRNA	Others(sense updown)	2.41	0	-11.2348	1.62126e-07	yes
MSTRG.14719	MSTRG.14719.1	3	-	12949166	12949899	734	1	Novel_lncRNA	Antisense LncRNAs	7.76	0.1	-6.27798	1.95453e-35	yes
MSTRG.14720	MSTRG.14720.1	3	-	12952086	12952410	325	1	Novel_lncRNA	Intergenic LncRNAs	1.5	0	-10.5507	0.00302028	yes
MSTRG.14721	MSTRG.14721.1	3	+	12952762	12953067	306	1	Novel_lncRNA	Intergenic LncRNAs	1.6	0	-10.6439	0.00302028	yes
MSTRG.14722	MSTRG.14722.1	3	-	12954803	12955162	360	1	Novel_lncRNA	Intergenic LncRNAs	2.41	0	-11.2348	1.6231e-05	yes
MSTRG.14723	MSTRG.14723.1	3	+	12954881	12955162	282	1	Novel_lncRNA	Intergenic LncRNAs	3.85	0	-11.9106	1.17037e-06	yes
MSTRG.14725	MSTRG.14725.1	3	-	13027037	13033898	321	2	Novel_lncRNA	Intergenic LncRNAs	1.01	0	-9.98014	0.0214131	yes
MSTRG.14726	MSTRG.14726.1	3	-	13034300	13034794	495	1	Novel_lncRNA	Intergenic LncRNAs	2.05	0	-11.0014	2.23847e-06	yes
MSTRG.14727	MSTRG.14727.1	3	+	13041343	13077278	207	2	Novel_lncRNA	Intergenic LncRNAs	1.57	0	-10.6165	0.0214131	yes
MSTRG.14730	MSTRG.14730.1	3	-	13068946	13069152	207	1	Novel_lncRNA	Intergenic LncRNAs	0.52	0	-9.02237	0.537283
MSTRG.14731	MSTRG.14731.1	3	+	13081450	13081703	254	1	Novel_lncRNA	Intergenic LncRNAs	1.07	0.15	-2.83458	0.14915
MSTRG.14737	MSTRG.14737.1	3	+	13093745	13154378	774	2	Novel_lncRNA	Bidirectional LncRNAs	9.4	2.93	-1.68176	6.15865e-15	yes
MSTRG.14746	MSTRG.14746.1	3	+	13151916	13152218	303	1	Novel_lncRNA	Intergenic LncRNAs	6.09	2.37	-1.36156	0.00090292	yes
MSTRG.14749	MSTRG.14749.1	3	-	13155669	13156284	616	1	Novel_lncRNA	Others(anti down),Others(sense updown)	38.32	1.78	-4.42815	9.51802e-130	yes
MSTRG.14750	MSTRG.14750.1	3	+	13155963	13156284	322	1	Novel_lncRNA	Bidirectional LncRNAs	12.64	0.59	-4.42114	1.8762e-22	yes
MSTRG.14751	MSTRG.14751.1	3	+	13156874	13157130	257	1	Novel_lncRNA	Intergenic LncRNAs	0.84	0	-9.71425	0.07712
MSTRG.14752	MSTRG.14752.1	3	+	13157860	13158302	443	1	Novel_lncRNA	Intergenic LncRNAs	0.37	0	-8.53138	0.284393
MSTRG.14754	MSTRG.14754.1	3	+	13158794	13159402	609	1	Novel_lncRNA	Others(anti down)	1.69	0.06	-4.81592	1.17037e-06	yes
MSTRG.14755	MSTRG.14755.1	3	+	13159690	13159893	204	1	Novel_lncRNA	Others(anti down)	21.81	1.67	-3.70707	9.5526e-23	yes
MSTRG.14758	MSTRG.14758.1	3	-	13181935	13182192	258	1	Novel_lncRNA	Intergenic LncRNAs	1.89	1.32	-0.517848	0.537283
MSTRG.14760	MSTRG.14760.1	3	-	13196405	13196633	229	1	Novel_lncRNA	Intergenic LncRNAs	2.13	0.17	-3.64725	0.00302028	yes
MSTRG.14761	MSTRG.14761.1	3	+	13197363	13197632	270	1	Novel_lncRNA	Intergenic LncRNAs	4.22	0	-12.043	6.10507e-07	yes
MSTRG.14764	MSTRG.14764.1	3	-	13243404	13246518	2422	3	Novel_lncRNA	Sense LncRNAs	5.91	1.05	-2.49277	1.04845e-46	yes
MSTRG.14784	MSTRG.14784.1	3	+	13374980	13381624	221	2	Novel_lncRNA	Bidirectional LncRNAs	3.44	0	-11.7482	6.00341e-05	yes
MSTRG.14796	MSTRG.14796.1	3	-	13495472	13496446	769	2	Novel_lncRNA	Intergenic LncRNAs	1.34	0.25	-2.42223	0.000280628	yes
MSTRG.14845	MSTRG.14845.5	3	-	14056714	14060185	646	2	Novel_lncRNA	Antisense LncRNAs	1.85	0.06	-4.94642	1.62126e-07	yes
MSTRG.14849	MSTRG.14849.1	3	+	14073400	14073600	201	1	Novel_lncRNA	Intergenic LncRNAs	0.92	0.56	-0.716207	0.730507
MSTRG.14851	MSTRG.14851.1	3	-	14135600	14135837	238	1	Novel_lncRNA	Intergenic LncRNAs	1.14	0	-10.1548	0.0406196	yes
MSTRG.14864	MSTRG.14864.1	3	+	14340188	14340417	230	1	Novel_lncRNA	Bidirectional LncRNAs	7.55	9.53	0.336	0.510945
MSTRG.14865	MSTRG.14865.1	3	-	14340191	14340417	227	1	Novel_lncRNA	Others(sense updown)	0.48	0	-8.90689	0.537283
MSTRG.14869	MSTRG.14869.1	3	-	14377498	14382399	200	2	Novel_lncRNA	Others(lnc(mRNA))	0.27	0	-8.07682	1
MSTRG.14876	MSTRG.14876.1	3	+	14425425	14430015	4591	1	Novel_lncRNA	Intergenic LncRNAs	2.27	0.14	-4.01919	1.1227e-54	yes
MSTRG.14882	MSTRG.14882.1	3	-	14493028	14493410	383	1	Novel_lncRNA	Intergenic LncRNAs	1.56	0	-10.6073	0.000418506	yes
MSTRG.14893	MSTRG.14893.1	3	+	14632415	14633087	673	1	Novel_lncRNA	Others(sense updown)	2.26	5	1.14561	0.000652014	yes
MSTRG.14906	MSTRG.14906.2	3	+	14788034	14788686	632	2	Novel_lncRNA	Others(sense updown)	1.97	1.61	-0.291135	0.53717
MSTRG.14912	MSTRG.14912.1	3	+	14901779	14905241	1476	3	Novel_lncRNA	Intergenic LncRNAs	3.97	0.12	-5.04803	7.66464e-35	yes
MSTRG.14912	MSTRG.14912.3	3	+	14901896	14906076	1485	4	Novel_lncRNA	Intergenic LncRNAs	4.01	0.08	-5.64746	6.48346e-37	yes
MSTRG.14912	MSTRG.14912.2	3	+	14901896	14906076	1591	3	Novel_lncRNA	Intergenic LncRNAs	6.53	0.4	-4.02901	1.1227e-54	yes
MSTRG.14929	MSTRG.14929.1	3	+	15077749	15077987	239	1	Novel_lncRNA	Intergenic LncRNAs	3.18	0.16	-4.31288	6.00341e-05	yes
MSTRG.14935	MSTRG.14935.1	3	+	15165506	15169411	514	2	Novel_lncRNA	Intergenic LncRNAs	1.58	6.32	2	2.94528e-07	yes
MSTRG.14940	MSTRG.14940.1	3	+	15233897	15234227	331	1	Novel_lncRNA	Antisense LncRNAs	1.73	0	-10.7566	0.000820714	yes
MSTRG.14942	MSTRG.14942.1	3	-	15236287	15236706	420	1	Novel_lncRNA	Intergenic LncRNAs	1.35	0.54	-1.32193	0.170894
MSTRG.14943	MSTRG.14943.1	3	-	15237088	15237382	295	1	Novel_lncRNA	Intergenic LncRNAs	1.47	0	-10.5216	0.00579257	yes
MSTRG.14944	MSTRG.14944.1	3	-	15252639	15253274	636	1	Novel_lncRNA	Intergenic LncRNAs	135.75	91.12	-0.575113	2.50123e-30
MSTRG.14945	MSTRG.14945.1	3	+	15252639	15253624	986	1	Novel_lncRNA	Intergenic LncRNAs	4.3	0.58	-2.89021	3.59362e-17	yes
MSTRG.14949	MSTRG.14949.1	3	-	15398381	15398615	235	1	Novel_lncRNA	Intergenic LncRNAs	0	1.13	10.1421	0.0406196	yes
MSTRG.14965	MSTRG.14965.1	3	+	15598090	15598335	246	1	Novel_lncRNA	Intronic LncRNAs	8.16	0.15	-5.76553	9.53511e-13	yes
MSTRG.14969	MSTRG.14969.1	3	+	15635024	15635504	481	1	Novel_lncRNA	Antisense LncRNAs	4.96	0	-12.2761	1.67296e-14	yes
MSTRG.14970	MSTRG.14970.1	3	-	15653313	15654454	543	2	Novel_lncRNA	Sense LncRNAs	0.4	7.38	4.20555	6.60484e-18	yes
MSTRG.14987	MSTRG.14987.1	3	+	15870453	15870772	320	1	Novel_lncRNA	Antisense LncRNAs	4.75	0.12	-5.30682	1.51832e-09	yes
MSTRG.14995	MSTRG.14995.1	3	-	16051381	16052162	782	1	Novel_lncRNA	Antisense LncRNAs	8.88	7.64	-0.216987	0.13363
MSTRG.15002	MSTRG.15002.1	3	-	16251466	16251716	251	1	Novel_lncRNA	Antisense LncRNAs	0.86	0	-9.74819	0.07712
MSTRG.15011	MSTRG.15011.1	3	+	16414139	16414638	500	1	Novel_lncRNA	Intergenic LncRNAs	27.68	1.06	-4.70671	1.05052e-80	yes
MSTRG.15032	MSTRG.15032.1	3	-	16662397	16665270	2874	1	Novel_lncRNA	Intergenic LncRNAs	1.45	0	-10.5018	2.12681e-25	yes
MSTRG.15033	MSTRG.15033.1	3	+	16663707	16665445	1739	1	Novel_lncRNA	Intergenic LncRNAs	3.56	0	-11.7977	8.45179e-38	yes
MSTRG.15036	MSTRG.15036.1	3	+	16712960	16713268	309	1	Novel_lncRNA	Intergenic LncRNAs	1.76	0	-10.7814	0.00157708	yes
MSTRG.15044	MSTRG.15044.1	3	-	16791129	16791347	219	1	Novel_lncRNA	Intergenic LncRNAs	1.49	0	-10.5411	0.0214131	yes
MSTRG.15045	MSTRG.15045.1	3	+	16791129	16791347	219	1	Novel_lncRNA	Intergenic LncRNAs	3.72	0	-11.8611	3.11919e-05	yes
MSTRG.15053	MSTRG.15053.1	3	+	16870655	16870908	254	1	Novel_lncRNA	Antisense LncRNAs	0.21	0	-7.71425	1
MSTRG.15073	MSTRG.15073.1	3	-	17136707	17137076	370	1	Novel_lncRNA	Others(sense updown)	1.76	0.1	-4.1375	0.000219491	yes
MSTRG.15078	MSTRG.15078.2	3	+	17183940	17186048	1101	2	Novel_lncRNA	Antisense LncRNAs	4.56	1.31	-1.79947	1.2226e-11	yes
MSTRG.15078	MSTRG.15078.1	3	+	17183940	17186048	2109	1	Novel_lncRNA	Antisense LncRNAs	6.97	0.94	-2.89043	1.18926e-56	yes
MSTRG.15081	MSTRG.15081.1	3	+	17207484	17207800	317	1	Novel_lncRNA	Intergenic LncRNAs	0.34	1.43	2.07241	0.112483
MSTRG.15106	MSTRG.15106.1	3	-	17611014	17611745	261	2	Novel_lncRNA	Intergenic LncRNAs	4.39	0.14	-4.97072	3.15374e-07	yes
MSTRG.15107	MSTRG.15107.1	3	+	17611033	17611276	244	1	Novel_lncRNA	Intergenic LncRNAs	4.23	0	-12.0464	2.23847e-06	yes
MSTRG.15112	MSTRG.15112.1	3	+	17663064	17663349	286	1	Novel_lncRNA	Intergenic LncRNAs	0	0.19	7.56986	1
MSTRG.15120	MSTRG.15120.1	3	-	17912161	17912393	233	1	Novel_lncRNA	Intergenic LncRNAs	0.7	0	-9.45121	0.284393
MSTRG.15121	MSTRG.15121.1	3	+	17915920	17916615	696	1	Novel_lncRNA	Others(sense updown)	2.51	0	-11.2935	1.04848e-10	yes
MSTRG.15126	MSTRG.15126.1	3	+	17967872	17968154	283	1	Novel_lncRNA	Intergenic LncRNAs	4.33	0	-12.0802	1.62126e-07	yes
MSTRG.15133	MSTRG.15133.1	3	-	18069578	18071082	484	3	Novel_lncRNA	Intergenic LncRNAs	4.39	2.04	-1.10565	0.00299901	yes
MSTRG.15133	MSTRG.15133.2	3	-	18069607	18071037	506	2	Novel_lncRNA	Intergenic LncRNAs	2.19	0.49	-2.16008	0.000913177	yes
MSTRG.15133	MSTRG.15133.3	3	-	18069607	18071037	351	3	Novel_lncRNA	Intergenic LncRNAs	1.93	0.79	-1.28868	0.0958121
MSTRG.15134	MSTRG.15134.1	3	+	18122110	18122447	338	1	Novel_lncRNA	Intergenic LncRNAs	0.81	0	-9.66178	0.0406196	yes
MSTRG.15135	MSTRG.15135.1	3	-	18122257	18122499	243	1	Novel_lncRNA	Intergenic LncRNAs	1.12	0	-10.1293	0.0406196	yes
MSTRG.15136	MSTRG.15136.1	3	-	18131879	18133339	333	2	Novel_lncRNA	Intergenic LncRNAs	1.02	0.11	-3.21299	0.0860559
MSTRG.15137	MSTRG.15137.1	3	+	18131899	18133329	303	2	Novel_lncRNA	Intergenic LncRNAs	4.3	0	-12.0701	4.27987e-08	yes
MSTRG.15141	MSTRG.15141.1	3	-	18233853	18234072	220	1	Novel_lncRNA	Intergenic LncRNAs	0.49	0	-8.93664	0.537283
MSTRG.15149	MSTRG.15149.1	3	+	18388929	18390077	1015	2	Novel_lncRNA	Others(sense updown)	620.16	1113.86	0.844856	3.05315e-200
MSTRG.15150	MSTRG.15150.1	3	-	18388930	18390089	1026	2	Novel_lncRNA	Bidirectional LncRNAs	28.14	7.26	-1.95458	1.42277e-68	yes
MSTRG.15151	MSTRG.15151.1	3	+	18411054	18411513	460	1	Novel_lncRNA	Intergenic LncRNAs	1.05	0	-10.0362	0.00302028	yes
MSTRG.15153	MSTRG.15153.1	3	+	18505290	18505510	221	1	Novel_lncRNA	Intergenic LncRNAs	0.74	0	-9.53138	0.284393
MSTRG.15154	MSTRG.15154.1	3	-	18513256	18513642	387	1	Novel_lncRNA	Intergenic LncRNAs	4.63	0.1	-5.53294	2.73364e-11	yes
MSTRG.15160	MSTRG.15160.5	3	+	18544797	18547774	2634	3	Novel_lncRNA	Others(sense updown)	3.56	0.29	-3.61775	2.42081e-45	yes
MSTRG.15160	MSTRG.15160.4	3	+	18544797	18547774	2566	4	Novel_lncRNA	Others(sense updown)	5.73	0.39	-3.87699	1.41408e-73	yes
MSTRG.15165	MSTRG.15165.3	3	+	18659809	18664091	1781	4	Novel_lncRNA	Sense LncRNAs	9.5	0.51	-4.21936	4.77142e-91	yes
MSTRG.15171	MSTRG.15171.1	3	+	18788371	18788733	363	1	Novel_lncRNA	Others(anti down)	2.99	0	-11.5459	1.17037e-06	yes
MSTRG.15175	MSTRG.15175.1	3	-	18844473	18844954	482	1	Novel_lncRNA	Intergenic LncRNAs	2.93	0	-11.5167	1.12178e-08	yes
MSTRG.15177	MSTRG.15177.1	3	+	18847718	18847933	216	1	Novel_lncRNA	Antisense LncRNAs	1	0	-9.96578	0.07712
MSTRG.15178	MSTRG.15178.1	3	+	18876694	18876993	300	1	Novel_lncRNA	Intergenic LncRNAs	2.71	0.76	-1.83422	0.00642701	yes
MSTRG.15180	MSTRG.15180.1	3	-	18959039	18959564	526	1	Novel_lncRNA	Intergenic LncRNAs	1.03	0	-10.0084	0.00157708	yes
MSTRG.15182	MSTRG.15182.1	3	-	18996350	18996550	201	1	Novel_lncRNA	Intergenic LncRNAs	0.27	0	-8.07682	1
MSTRG.15183	MSTRG.15183.1	3	-	19013095	19013636	542	1	Novel_lncRNA	Antisense LncRNAs	2.3	0	-11.1674	1.62126e-07	yes
MSTRG.15185	MSTRG.15185.1	3	-	19047906	19048360	455	1	Novel_lncRNA	Intergenic LncRNAs	11.28	2.99	-1.91555	5.10084e-13	yes
MSTRG.15188	MSTRG.15188.1	3	+	19143422	19144079	658	1	Novel_lncRNA	Intergenic LncRNAs	2.72	0.06	-5.5025	2.73364e-11	yes
MSTRG.15191	MSTRG.15191.1	3	-	19181741	19182019	279	1	Novel_lncRNA	Bidirectional LncRNAs	1.17	0.14	-3.06301	0.0860559
MSTRG.15209	MSTRG.15209.1	3	+	19484141	19527105	268	2	Novel_lncRNA	Bidirectional LncRNAs	3.04	0.14	-4.44057	3.11919e-05	yes
MSTRG.15216	MSTRG.15216.1	3	+	19527219	19528392	840	5	Novel_lncRNA	Bidirectional LncRNAs	4.33	0.86	-2.33196	7.74844e-12	yes
MSTRG.15217	MSTRG.15217.1	3	+	19538177	19657437	396	2	Novel_lncRNA	Bidirectional LncRNAs	2.47	1.05	-1.23412	0.0326755	yes
MSTRG.15226	MSTRG.15226.1	3	-	19618674	19618944	271	1	Novel_lncRNA	Intergenic LncRNAs	2.2	0	-11.1033	0.000418506	yes
MSTRG.15229	MSTRG.15229.2	3	-	19710523	19714814	3550	5	Novel_lncRNA	Sense LncRNAs	3.6	0.18	-4.32193	4.71819e-70	yes
MSTRG.15236	MSTRG.15236.1	3	+	19741644	19741893	250	1	Novel_lncRNA	Intergenic LncRNAs	1.09	0	-10.0901	0.0406196	yes
MSTRG.15240	MSTRG.15240.1	3	+	19787853	19788690	838	1	Novel_lncRNA	Intergenic LncRNAs	6.86	3.61	-0.92621	1.28855e-05
MSTRG.15256	MSTRG.15256.1	3	-	19944855	19945345	491	1	Novel_lncRNA	Intergenic LncRNAs	1.11	2.08	0.906024	0.208367
MSTRG.15257	MSTRG.15257.1	3	+	19949779	19950282	504	1	Novel_lncRNA	Intergenic LncRNAs	1.62	1.95	0.26748	0.922925
MSTRG.15263	MSTRG.15263.1	3	-	20026796	20027738	943	1	Novel_lncRNA	Antisense LncRNAs	2.19	0.68	-1.68732	6.034e-05	yes
MSTRG.15265	MSTRG.15265.1	3	-	20050021	20050244	224	1	Novel_lncRNA	Intergenic LncRNAs	1.98	0	-10.9513	0.00579257	yes
MSTRG.15268	MSTRG.15268.1	3	-	20084626	20086830	2205	1	Novel_lncRNA	Antisense LncRNAs	2.19	0.33	-2.73039	2.17844e-18	yes
MSTRG.15268	MSTRG.15268.2	3	-	20084950	20086862	445	2	Novel_lncRNA	Others(lnc(mRNA))	1.22	1.44	0.239188	0.892119
MSTRG.15279	MSTRG.15279.1	3	+	20191019	20192519	1501	1	Novel_lncRNA	Antisense LncRNAs	2.93	3.3	0.171565	0.722217
MSTRG.15283	MSTRG.15283.1	3	+	20207264	20213857	390	2	Novel_lncRNA	Antisense LncRNAs	4.87	0	-12.2497	1.39673e-11	yes
MSTRG.15302	MSTRG.15302.1	3	+	20527038	20527432	395	1	Novel_lncRNA	Intergenic LncRNAs	2.61	0.96	-1.44294	0.0221669	yes
MSTRG.15303	MSTRG.15303.1	3	-	20527045	20527432	388	1	Novel_lncRNA	Intergenic LncRNAs	1.82	0	-10.8297	0.000115018	yes
MSTRG.15308	MSTRG.15308.1	3	+	20628431	20632139	1626	4	Novel_lncRNA	Sense LncRNAs	1.57	0.48	-1.70966	3.92604e-06	yes
MSTRG.15309	MSTRG.15309.1	3	+	20646597	20650520	3832	2	Novel_lncRNA	Antisense LncRNAs	5.65	0.37	-3.93265	1.57232e-108	yes
MSTRG.15312	MSTRG.15312.1	3	-	20705924	20707378	878	2	Novel_lncRNA	Others(sense updown)	1.48	0	-10.5314	4.27987e-08	yes
MSTRG.15313	MSTRG.15313.3	3	+	20712202	20716320	3708	3	Novel_lncRNA	Sense LncRNAs	4.26	0.48	-3.14975	2.90002e-66	yes
MSTRG.15314	MSTRG.15314.1	3	+	20732789	20733105	317	1	Novel_lncRNA	Bidirectional LncRNAs	5.3	0.72	-2.87992	4.93634e-07	yes
MSTRG.15320	MSTRG.15320.2	3	-	20795913	20797256	779	2	Novel_lncRNA	Others(sense updown)	2.63	0.25	-3.39506	8.34392e-10	yes
MSTRG.15320	MSTRG.15320.1	3	-	20795913	20797256	983	3	Novel_lncRNA	Others(sense updown)	5.92	0.15	-5.30256	2.5443e-36	yes
MSTRG.15323	MSTRG.15323.1	3	-	20849286	20850449	1164	1	Novel_lncRNA	Antisense LncRNAs	3.36	0.13	-4.69188	6.54075e-23	yes
MSTRG.15339	MSTRG.15339.2	3	-	21001333	21002722	1209	2	Novel_lncRNA	Sense LncRNAs	1.1	0	-10.1033	4.27987e-08	yes
MSTRG.15353	MSTRG.15353.1	3	+	21243914	21244240	327	1	Novel_lncRNA	Intergenic LncRNAs	6.8	0.12	-5.82443	6.42263e-14	yes
MSTRG.15359	MSTRG.15359.1	3	+	21370693	21374307	1018	3	Novel_lncRNA	Others(sense updown)	5.49	0.33	-4.05627	1.9016e-29	yes
MSTRG.15375	MSTRG.15375.1	3	+	21528916	21529260	345	1	Novel_lncRNA	Bidirectional LncRNAs	1.52	0	-10.5699	0.00157708	yes
MSTRG.15378	MSTRG.15378.1	3	-	21564047	21565500	262	2	Novel_lncRNA	Intergenic LncRNAs	4.14	0	-12.0154	1.17037e-06	yes
MSTRG.15387	MSTRG.15387.1	3	-	21661396	21661729	334	1	Novel_lncRNA	Intergenic LncRNAs	1.3	0	-10.3443	0.00579257	yes
MSTRG.15401	MSTRG.15401.1	3	-	21819956	21820630	675	1	Novel_lncRNA	Others(sense updown)	1.05	2.3	1.13124	0.0327337	yes
MSTRG.15407	MSTRG.15407.1	3	-	21863536	21863809	274	1	Novel_lncRNA	Others(sense updown)	0.79	0.14	-2.49643	0.25698
MSTRG.15416	MSTRG.15416.1	3	+	22075390	22075698	309	1	Novel_lncRNA	Intergenic LncRNAs	1.93	0	-10.9144	0.000418506	yes
MSTRG.15421	MSTRG.15421.1	3	+	22147989	22153558	683	4	Novel_lncRNA	Intergenic LncRNAs	3.34	0	-11.7056	6.42263e-14	yes
MSTRG.15435	MSTRG.15435.1	3	-	22377759	22384752	6033	2	Novel_lncRNA	Intergenic LncRNAs	101.55	2.11	-5.5888	0	yes
MSTRG.15435	MSTRG.15435.2	3	-	22378532	22384752	6135	2	Novel_lncRNA	Intergenic LncRNAs	48.97	2.32	-4.3997	0	yes
MSTRG.15436	MSTRG.15436.4	3	-	22387372	22393130	595	5	Novel_lncRNA	Sense LncRNAs	1.88	0.22	-3.09516	2.22797e-05	yes
MSTRG.15436	MSTRG.15436.3	3	-	22387372	22393130	509	3	Novel_lncRNA	Sense LncRNAs	2.54	0.09	-4.81876	4.27987e-08	yes
MSTRG.15436	MSTRG.15436.1	3	-	22387372	22393130	471	3	Novel_lncRNA	Sense LncRNAs	2.54	0.81	-1.64883	0.00453039	yes
MSTRG.15440	MSTRG.15440.1	3	+	22409726	22409975	250	1	Novel_lncRNA	Others(anti down)	28.44	0	-14.7956	2.02421e-43	yes
MSTRG.15441	MSTRG.15441.1	3	+	22410559	22412249	1565	2	Novel_lncRNA	Antisense LncRNAs	207.06	30.99	-2.74017	0	yes
MSTRG.15442	MSTRG.15442.1	3	-	22410624	22412210	1406	3	Novel_lncRNA	Sense LncRNAs	22.73	5.03	-2.17597	6.85626e-87	yes
MSTRG.15443	MSTRG.15443.1	3	-	22437121	22437790	670	1	Novel_lncRNA	Intergenic LncRNAs	2315.61	649.92	-1.83306	0	yes
MSTRG.15444	MSTRG.15444.1	3	+	22437121	22437885	765	1	Novel_lncRNA	Intergenic LncRNAs	23.48	2.77	-3.08347	2.24104e-73	yes
MSTRG.15456	MSTRG.15456.3	3	+	22654941	22660389	2400	6	Novel_lncRNA	Sense LncRNAs	2.33	0.21	-3.47187	2.04413e-26	yes
MSTRG.15461	MSTRG.15461.1	3	+	22688153	22690291	394	3	Novel_lncRNA	Antisense LncRNAs	1.52	0	-10.5699	0.000418506	yes
MSTRG.15464	MSTRG.15464.1	3	+	22752197	22753973	940	4	Novel_lncRNA	Intergenic LncRNAs	3.12	1.09	-1.51722	3.79958e-06	yes
MSTRG.15465	MSTRG.15465.1	3	+	22789523	22789765	243	1	Novel_lncRNA	Intergenic LncRNAs	1.12	0	-10.1293	0.0406196	yes
MSTRG.15466	MSTRG.15466.1	3	+	22791413	22791853	441	1	Novel_lncRNA	Intergenic LncRNAs	3.94	0	-11.944	1.04848e-10	yes
MSTRG.15478	MSTRG.15478.1	3	-	23017073	23017487	415	1	Novel_lncRNA	Intergenic LncRNAs	5.23	0	-12.3526	2.47938e-13	yes
MSTRG.15487	MSTRG.15487.5	3	+	23184956	23187829	830	2	Novel_lncRNA	Sense LncRNAs	0.78	1.37	0.81263	0.183178
MSTRG.15491	MSTRG.15491.1	3	+	23235055	23235289	235	1	Novel_lncRNA	Intronic LncRNAs	10.62	2.73	-1.95981	4.59433e-07	yes
MSTRG.15505	MSTRG.15505.1	3	+	23391440	23393325	1706	2	Novel_lncRNA	Antisense LncRNAs	15.73	4.28	-1.87784	7.48121e-61	yes
MSTRG.15539	MSTRG.15539.1	3	+	23789307	23789718	350	2	Novel_lncRNA	Intergenic LncRNAs	1.24	0	-10.2761	0.00579257	yes
MSTRG.15543	MSTRG.15543.2	3	-	23826811	23827989	1035	2	Novel_lncRNA	Antisense LncRNAs	87.45	415.53	2.24842	0	yes
MSTRG.15548	MSTRG.15548.1	3	+	23860130	23862154	813	4	Novel_lncRNA	Sense LncRNAs	1.7	6.08	1.83854	1.18501e-09	yes
MSTRG.15551	MSTRG.15551.1	3	-	23903896	23904625	730	1	Novel_lncRNA	Intergenic LncRNAs	1.12	2.8	1.32193	0.00408875	yes
MSTRG.15555	MSTRG.15555.1	3	+	23939010	23939346	297	2	Novel_lncRNA	Others(sense updown)	1.28	0	-10.3219	0.0111518	yes
MSTRG.15559	MSTRG.15559.1	3	+	23963696	23964014	319	1	Novel_lncRNA	Intergenic LncRNAs	2.04	0.95	-1.10257	0.139909
MSTRG.15572	MSTRG.15572.1	3	-	24144991	24145588	445	2	Novel_lncRNA	Antisense LncRNAs	2.44	5.78	1.24419	0.00148246	yes
MSTRG.15583	MSTRG.15583.1	3	-	24309188	24309399	212	1	Novel_lncRNA	Intergenic LncRNAs	51.2	0.89	-5.84619	2.62593e-67	yes
MSTRG.15584	MSTRG.15584.1	3	+	24309431	24309636	206	1	Novel_lncRNA	Intergenic LncRNAs	0.53	0	-9.04985	0.537283
MSTRG.15587	MSTRG.15587.1	3	+	24371210	24814993	621	2	Novel_lncRNA	Others(sense updown),Others(anti down)	1976.53	10666.1	2.43199	0	yes
MSTRG.15588	MSTRG.15588.1	3	-	24371224	24814989	603	2	Novel_lncRNA	Others(anti down),Others(sense updown)	48.02	4	-3.58556	1.64187e-134	yes
MSTRG.15666	MSTRG.15666.1	3	+	25061474	25061726	253	1	Novel_lncRNA	Others(anti down)	136.21	4.18	-5.02619	2.10534e-206	yes
MSTRG.15678	MSTRG.15678.1	3	+	25186553	25186984	432	1	Novel_lncRNA	Intergenic LncRNAs	9.23	0.81	-3.51034	4.77277e-19	yes
MSTRG.15680	MSTRG.15680.1	3	-	25197160	25198096	937	1	Novel_lncRNA	Antisense LncRNAs	2.95	0.16	-4.20457	8.09418e-15	yes
MSTRG.15681	MSTRG.15681.1	3	-	25198324	25201052	1562	2	Novel_lncRNA	Antisense LncRNAs	2.08	0.19	-3.45251	1.28423e-15	yes
MSTRG.15688	MSTRG.15688.1	3	+	25275491	25275720	230	1	Novel_lncRNA	Intergenic LncRNAs	1.4	0	-10.4512	0.0214131	yes
MSTRG.15689	MSTRG.15689.1	3	+	25283082	25283283	202	1	Novel_lncRNA	Intergenic LncRNAs	0.27	0	-8.07682	1
MSTRG.15698	MSTRG.15698.3	3	-	25411667	25413513	1810	2	Novel_lncRNA	Intergenic LncRNAs	4.18	0	-12.0293	4.52192e-46	yes
MSTRG.15700	MSTRG.15700.1	3	+	25445166	25445862	697	1	Novel_lncRNA	Others(sense updown)	2.26	9.11	2.01113	2.52635e-13	yes
MSTRG.15704	MSTRG.15704.1	3	+	25502651	25503105	313	2	Novel_lncRNA	Intergenic LncRNAs	0.35	0	-8.45121	0.537283
MSTRG.15705	MSTRG.15705.2	3	-	25511045	25512752	1101	3	Novel_lncRNA	Sense LncRNAs	8.1	0.38	-4.41385	2.58071e-49	yes
MSTRG.15711	MSTRG.15711.1	3	+	25580492	25580728	237	1	Novel_lncRNA	Others(sense updown)	2.06	0.8	-1.36457	0.14346
MSTRG.15712	MSTRG.15712.1	3	-	25580492	25580728	237	1	Novel_lncRNA	Bidirectional LncRNAs	6.41	0.32	-4.32418	2.3319e-08	yes
MSTRG.15717	MSTRG.15717.1	3	+	25621884	25622596	240	2	Novel_lncRNA	Intergenic LncRNAs	0.68	0	-9.40939	0.284393
MSTRG.15720	MSTRG.15720.1	3	+	25678655	25678959	305	1	Novel_lncRNA	Sense LncRNAs	1.6	0	-10.6439	0.00302028	yes
MSTRG.15720	MSTRG.15720.3	3	+	25687991	25690656	2584	2	Novel_lncRNA	Antisense LncRNAs	4.4	0.65	-2.75899	9.07857e-42	yes
MSTRG.15747	MSTRG.15747.1	3	+	25894136	25894415	203	2	Novel_lncRNA	Intergenic LncRNAs	0.53	0	-9.04985	0.537283
MSTRG.15771	MSTRG.15771.1	3	+	26179807	26180313	507	1	Novel_lncRNA	Intergenic LncRNAs	0.43	1.34	1.63982	0.0531944
MSTRG.15780	MSTRG.15780.1	3	-	26295132	26295610	479	1	Novel_lncRNA	Intergenic LncRNAs	1.66	0	-10.697	3.11919e-05	yes
MSTRG.15796	MSTRG.15796.3	3	+	26471677	26475275	3248	4	Novel_lncRNA	Sense LncRNAs	7.9	2.64	-1.58131	4.67976e-46	yes
MSTRG.15807	MSTRG.15807.1	3	-	26550221	26550474	254	1	Novel_lncRNA	Antisense LncRNAs	1.63	0	-10.6707	0.00579257	yes
MSTRG.15908	MSTRG.15908.1	3	-	27623265	27623739	475	1	Novel_lncRNA	Intronic LncRNAs	0.91	0	-9.82972	0.00579257	yes
MSTRG.15914	MSTRG.15914.1	3	-	27670966	27671698	733	1	Novel_lncRNA	Others(anti down)	1.85	0.41	-2.17383	0.000218261	yes
MSTRG.15930	MSTRG.15930.1	3	-	27799509	27799986	478	1	Novel_lncRNA	Others(anti down)	3.75	3.8	0.0191088	1
MSTRG.15940	MSTRG.15940.1	3	-	27859602	27859904	303	1	Novel_lncRNA	Intergenic LncRNAs	91.61	30.32	-1.59524	2.59161e-50	yes
MSTRG.15959	MSTRG.15959.1	3	-	28044235	28047319	3046	2	Novel_lncRNA	Intergenic LncRNAs	9.26	0.1	-6.53294	8.40026e-173	yes
MSTRG.16024	MSTRG.16024.1	3	+	28672368	28672741	374	1	Novel_lncRNA	Bidirectional LncRNAs	2.32	0.61	-1.92724	0.00400671	yes
MSTRG.16025	MSTRG.16025.1	3	-	28674975	28675259	285	1	Novel_lncRNA	Intergenic LncRNAs	6.02	0.53	-3.5057	1.62204e-08	yes
MSTRG.16026	MSTRG.16026.1	3	-	28675561	28675845	285	1	Novel_lncRNA	Intergenic LncRNAs	8.76	0.27	-5.0199	1.12863e-15	yes
MSTRG.16042	MSTRG.16042.7	3	+	28826950	28828527	1578	1	Novel_lncRNA	Sense LncRNAs	0.57	5.44	3.25457	1.1699e-30	yes
MSTRG.16059	MSTRG.16059.1	3	+	28965146	28966506	1361	1	Novel_lncRNA	Antisense LncRNAs	3.43	1.06	-1.69414	2.67283e-10	yes
MSTRG.16066	MSTRG.16066.1	3	+	29029671	29029900	230	1	Novel_lncRNA	Others(anti down)	6.13	0	-12.5817	1.12178e-08	yes
MSTRG.16069	MSTRG.16069.6	3	+	29046923	29048747	1592	4	Novel_lncRNA	Sense LncRNAs	2.74	3.43	0.324033	0.265691
MSTRG.16069	MSTRG.16069.7	3	+	29046979	29055986	2652	9	Novel_lncRNA	Sense LncRNAs	2.23	1.5	-0.572081	0.00213867
MSTRG.16125	MSTRG.16125.2	3	-	29484759	29487389	2568	2	Novel_lncRNA	Sense LncRNAs	2.98	0.23	-3.69561	1.84579e-37	yes
MSTRG.16126	MSTRG.16126.1	3	-	29488080	29488939	679	2	Novel_lncRNA	Intronic LncRNAs	10.89	0.5	-4.44493	1.69765e-41	yes
MSTRG.16127	MSTRG.16127.1	3	-	29498149	29498907	759	1	Novel_lncRNA	Others(anti down)	8.22	1.2	-2.7761	7.60311e-24	yes
MSTRG.16130	MSTRG.16130.1	3	-	29501413	29502028	564	2	Novel_lncRNA	Antisense LncRNAs	16.66	0.62	-4.74798	4.3538e-55	yes
MSTRG.16132	MSTRG.16132.4	3	+	29515392	29517368	1186	2	Novel_lncRNA	Antisense LncRNAs	14.18	5	-1.50386	7.1178e-29	yes
MSTRG.16163	MSTRG.16163.1	3	+	29776682	29776973	292	1	Novel_lncRNA	Others(sense updown)	0.93	0	-9.86109	0.0406196	yes
MSTRG.16180	MSTRG.16180.1	3	-	29860975	29861616	642	1	Novel_lncRNA	Intergenic LncRNAs	1.78	4.24	1.25219	0.00143348	yes
MSTRG.16214	MSTRG.16214.1	3	-	30151932	30152404	473	1	Novel_lncRNA	Bidirectional LncRNAs	4.02	0.08	-5.65105	7.16614e-12	yes
MSTRG.16215	MSTRG.16215.1	3	+	30151935	30152404	470	1	Novel_lncRNA	Others(sense updown)	11.55	1.85	-2.6423	1.14869e-19	yes
MSTRG.16234	MSTRG.16234.1	3	+	30325562	30325848	287	1	Novel_lncRNA	Intergenic LncRNAs	0.76	0	-9.56986	0.07712
MSTRG.16235	MSTRG.16235.1	3	+	30328714	30328935	222	1	Novel_lncRNA	Antisense LncRNAs	3.18	0.34	-3.22542	0.000867787	yes
MSTRG.16246	MSTRG.16246.1	3	-	30397006	30399154	491	2	Novel_lncRNA	Intergenic LncRNAs	0	1.69	10.7228	7.82158e-05	yes
MSTRG.16254	MSTRG.16254.1	3	+	30454761	30455256	401	2	Novel_lncRNA	Sense LncRNAs	6.36	7.54	0.245538	0.630793
MSTRG.16274	MSTRG.16274.1	3	-	30641941	30642210	270	1	Novel_lncRNA	Intergenic LncRNAs	2.06	0.28	-2.87915	0.00521537	yes
MSTRG.16275	MSTRG.16275.1	3	+	30641972	30642210	239	1	Novel_lncRNA	Intergenic LncRNAs	0.2	1.55	2.9542	0.0501844
MSTRG.16291	MSTRG.16291.1	3	-	30735908	30736170	263	1	Novel_lncRNA	Intergenic LncRNAs	2.89	0	-11.4969	6.00341e-05	yes
MSTRG.16293	MSTRG.16293.1	3	-	30744910	30745736	827	1	Novel_lncRNA	Antisense LncRNAs	3.41	0	-11.7356	1.91786e-17	yes
MSTRG.16302	MSTRG.16302.1	3	+	30808805	30810345	1309	2	Novel_lncRNA	Intergenic LncRNAs	1.88	0.95	-0.984733	0.00364337
MSTRG.16327	MSTRG.16327.1	3	-	31028431	31028763	333	1	Novel_lncRNA	Antisense LncRNAs	0.98	1.7	0.794681	0.540905
MSTRG.16328	MSTRG.16328.1	3	-	31032263	31033489	1227	1	Novel_lncRNA	Sense LncRNAs	10.88	6.9	-0.65701	3.0903e-07
MSTRG.16329	MSTRG.16329.1	3	-	31042644	31042922	279	1	Novel_lncRNA	Intergenic LncRNAs	1.36	0	-10.4094	0.0111518	yes
MSTRG.16353	MSTRG.16353.1	3	-	31248973	31249844	221	2	Novel_lncRNA	Intergenic LncRNAs	2.21	0	-11.1098	0.00302028	yes
MSTRG.16478	MSTRG.16478.1	3	-	32087546	32088052	413	2	Novel_lncRNA	Antisense LncRNAs	1.58	0	-10.6257	0.000219491	yes
MSTRG.16485	MSTRG.16485.1	3	+	32143196	32143454	259	1	Novel_lncRNA	Intergenic LncRNAs	9.85	0.28	-5.13662	5.75172e-16	yes
MSTRG.16535	MSTRG.16535.1	3	+	32563949	32564318	370	1	Novel_lncRNA	Bidirectional LncRNAs	0.15	0.2	0.415037	1
MSTRG.16550	MSTRG.16550.1	3	+	32675475	32676172	587	2	Novel_lncRNA	Sense LncRNAs	0.89	1.08	0.279154	0.892119
MSTRG.16551	MSTRG.16551.1	3	-	32682238	32684347	2019	2	Novel_lncRNA	Sense LncRNAs	3.17	0.73	-2.11851	7.89864e-18	yes
MSTRG.16567	MSTRG.16567.1	3	-	32773800	32774019	220	1	Novel_lncRNA	Others(anti down),Others(sense updown)	0.99	2.58	1.38187	0.117157
MSTRG.16577	MSTRG.16577.1	3	-	32843881	32845400	390	2	Novel_lncRNA	Antisense LncRNAs	11.41	16.87	0.564161	0.0159921
MSTRG.16654	MSTRG.16654.1	3	-	33348226	33348573	348	1	Novel_lncRNA	Intergenic LncRNAs	3.59	0.33	-3.44345	3.76979e-06	yes
MSTRG.16674	MSTRG.16674.1	3	-	33539204	33539686	483	1	Novel_lncRNA	Intergenic LncRNAs	2.92	0.23	-3.66626	6.30093e-07	yes
MSTRG.16694	MSTRG.16694.1	3	+	33658070	33658371	302	1	Novel_lncRNA	Intergenic LncRNAs	1.8	0.25	-2.848	0.00521537	yes
MSTRG.16704	MSTRG.16704.1	3	+	33736299	33736540	242	1	Novel_lncRNA	Intergenic LncRNAs	56.51	151.99	1.4274	2.02421e-43	yes
MSTRG.16705	MSTRG.16705.1	3	-	33736303	33737145	843	1	Novel_lncRNA	Intergenic LncRNAs	15.15	16.61	0.132734	0.698949
MSTRG.16706	MSTRG.16706.1	3	+	33736863	33737145	283	1	Novel_lncRNA	Intergenic LncRNAs	20.04	2.22	-3.17425	2.06347e-24	yes
MSTRG.16767	MSTRG.16767.1	3	+	34070087	34070423	337	1	Novel_lncRNA	Intergenic LncRNAs	1.29	9.65	2.90316	1.04848e-10	yes
MSTRG.16777	MSTRG.16777.1	3	-	34211142	34211380	239	1	Novel_lncRNA	Intergenic LncRNAs	0.68	0	-9.40939	0.284393
MSTRG.16808	MSTRG.16808.1	4	-	13296	13545	250	1	Novel_lncRNA	Intergenic LncRNAs	0.65	0	-9.3443	0.284393
MSTRG.16814	MSTRG.16814.1	4	+	87806	88066	261	1	Novel_lncRNA	Intergenic LncRNAs	2.79	0	-11.446	0.000115018	yes
MSTRG.16826	MSTRG.16826.1	4	-	268114	268736	255	2	Novel_lncRNA	Bidirectional LncRNAs	3.43	0	-11.744	1.6231e-05	yes
MSTRG.16830	MSTRG.16830.1	4	-	301616	301836	221	1	Novel_lncRNA	Intergenic LncRNAs	1.23	0	-10.2644	0.0406196	yes
MSTRG.16840	MSTRG.16840.1	4	-	400563	401008	446	1	Novel_lncRNA	Intergenic LncRNAs	3.64	0.59	-2.62515	3.26032e-06	yes
MSTRG.16843	MSTRG.16843.1	4	-	503288	503587	300	1	Novel_lncRNA	Bidirectional LncRNAs	1.99	0	-10.9586	0.000418506	yes
MSTRG.16863	MSTRG.16863.1	4	-	785494	785809	316	1	Novel_lncRNA	Intronic LncRNAs	1.18	2.51	1.0889	0.200273
MSTRG.16866	MSTRG.16866.1	4	+	819649	822533	548	2	Novel_lncRNA	Others(sense updown)	1.16	6.65	2.51923	1.38523e-10	yes
MSTRG.16867	MSTRG.16867.1	4	+	866796	867023	228	1	Novel_lncRNA	Intergenic LncRNAs	0.48	0	-8.90689	0.537283
MSTRG.16871	MSTRG.16871.1	4	-	898479	898947	469	1	Novel_lncRNA	Intronic LncRNAs	0.93	6.13	2.72058	3.3224e-09	yes
MSTRG.16882	MSTRG.16882.1	4	+	978322	981139	766	2	Novel_lncRNA	Others(lnc(mRNA))	2.62	1.04	-1.33298	0.000679554	yes
MSTRG.16893	MSTRG.16893.1	4	-	1100180	1100480	301	1	Novel_lncRNA	Intergenic LncRNAs	1.31	0	-10.3554	0.0111518	yes
MSTRG.16894	MSTRG.16894.1	4	+	1100196	1100447	252	1	Novel_lncRNA	Intergenic LncRNAs	3.57	0	-11.8017	8.46889e-06	yes
MSTRG.16900	MSTRG.16900.1	4	+	1457840	1458095	256	1	Novel_lncRNA	Intergenic LncRNAs	3.85	0.16	-4.58871	2.23847e-06	yes
MSTRG.16901	MSTRG.16901.1	4	-	1457847	1458107	261	1	Novel_lncRNA	Intergenic LncRNAs	3.12	0	-11.6073	3.11919e-05	yes
MSTRG.16902	MSTRG.16902.1	4	-	1465356	1465565	210	1	Novel_lncRNA	Intergenic LncRNAs	1.55	0	-10.5981	0.0214131	yes
MSTRG.16904	MSTRG.16904.1	4	-	1470318	1470558	241	1	Novel_lncRNA	Others(sense updown)	0.9	0	-9.81378	0.07712
MSTRG.16907	MSTRG.16907.1	4	-	1515987	1516219	233	1	Novel_lncRNA	Intergenic LncRNAs	0.23	0	-7.84549	1
MSTRG.16908	MSTRG.16908.1	4	-	1516752	1517036	285	1	Novel_lncRNA	Intergenic LncRNAs	0.38	0	-8.56986	0.537283
MSTRG.16909	MSTRG.16909.1	4	+	1516801	1517066	266	1	Novel_lncRNA	Intergenic LncRNAs	1.59	0.14	-3.50553	0.0290932	yes
MSTRG.16920	MSTRG.16920.1	4	+	1738622	1739105	484	1	Novel_lncRNA	Intergenic LncRNAs	4.06	0.08	-5.66534	1.87722e-12	yes
MSTRG.16921	MSTRG.16921.1	4	+	1739471	1739734	264	1	Novel_lncRNA	Intergenic LncRNAs	1.39	0.14	-3.31159	0.0501844
MSTRG.16922	MSTRG.16922.1	4	+	1767285	1767508	224	1	Novel_lncRNA	Others(anti down)	2.67	0	-11.3826	0.000418506	yes
MSTRG.16925	MSTRG.16925.1	4	-	1792652	1793179	528	1	Novel_lncRNA	Intergenic LncRNAs	6.78	3.22	-1.07422	0.000126159	yes
MSTRG.16927	MSTRG.16927.1	4	+	1873341	1873541	201	1	Novel_lncRNA	Intergenic LncRNAs	0.54	0.19	-1.50696	1
MSTRG.16928	MSTRG.16928.1	4	-	1877012	1877986	975	1	Novel_lncRNA	Antisense LncRNAs	1.34	0	-10.388	4.27987e-08	yes
MSTRG.16929	MSTRG.16929.2	4	+	1877244	1878041	716	2	Novel_lncRNA	Sense LncRNAs	1.52	0	-10.5699	1.17037e-06	yes
MSTRG.16931	MSTRG.16931.1	4	+	1975805	1976560	756	1	Novel_lncRNA	Intergenic LncRNAs	2.44	0	-11.2527	2.73364e-11	yes
MSTRG.16939	MSTRG.16939.1	4	-	2235949	2236173	225	1	Novel_lncRNA	Antisense LncRNAs	0.72	0	-9.49185	0.284393
MSTRG.16940	MSTRG.16940.1	4	-	2257378	2257747	370	1	Novel_lncRNA	Intergenic LncRNAs	8.78	1.23	-2.83556	1.36618e-12	yes
MSTRG.16941	MSTRG.16941.1	4	+	2257453	2257746	294	1	Novel_lncRNA	Intergenic LncRNAs	3.53	0.13	-4.76308	1.17037e-06	yes
MSTRG.16942	MSTRG.16942.1	4	+	2267109	2267322	214	1	Novel_lncRNA	Intergenic LncRNAs	0.25	0	-7.96578	1
MSTRG.16943	MSTRG.16943.1	4	-	2267165	2267442	278	1	Novel_lncRNA	Intergenic LncRNAs	5.1	0	-12.3163	1.12178e-08	yes
MSTRG.16945	MSTRG.16945.1	4	+	2308408	2308684	277	1	Novel_lncRNA	Intergenic LncRNAs	3.96	1.85	-1.09798	0.0329307	yes
MSTRG.16946	MSTRG.16946.1	4	+	2349584	2350129	546	1	Novel_lncRNA	Intergenic LncRNAs	0.4	0	-8.64386	0.07712
MSTRG.16948	MSTRG.16948.1	4	-	2408526	2409003	478	1	Novel_lncRNA	Intergenic LncRNAs	1.36	0	-10.4094	0.000219491	yes
MSTRG.16949	MSTRG.16949.1	4	-	2418122	2418491	370	1	Novel_lncRNA	Intergenic LncRNAs	1.03	0	-10.0084	0.0111518	yes
MSTRG.16951	MSTRG.16951.1	4	-	2495079	2495440	362	1	Novel_lncRNA	Others(anti down)	6	0.52	-3.52838	2.47767e-10	yes
MSTRG.16952	MSTRG.16952.1	4	+	2495082	2495333	252	1	Novel_lncRNA	Others(sense updown)	5.55	0.75	-2.88753	3.28629e-06	yes
MSTRG.16953	MSTRG.16953.1	4	-	2534389	2535414	488	2	Novel_lncRNA	Intergenic LncRNAs	3.75	0.08	-5.55075	1.39673e-11	yes
MSTRG.16954	MSTRG.16954.1	4	+	2551151	2552151	282	2	Novel_lncRNA	Others(sense updown)	2.31	0	-11.1737	0.000219491	yes
MSTRG.16956	MSTRG.16956.1	4	+	2556385	2556731	347	1	Novel_lncRNA	Intergenic LncRNAs	2.03	0	-10.9873	0.000115018	yes
MSTRG.16958	MSTRG.16958.1	4	+	2616622	2617087	466	1	Novel_lncRNA	Others(sense updown)	0.82	0.89	0.118181	1
MSTRG.16959	MSTRG.16959.1	4	-	2616738	2617109	372	1	Novel_lncRNA	Bidirectional LncRNAs	1.9	0	-10.8918	0.000115018	yes
MSTRG.16961	MSTRG.16961.1	4	-	2639514	2641024	315	2	Novel_lncRNA	Intergenic LncRNAs	1.55	0	-10.5981	0.00302028	yes
MSTRG.16962	MSTRG.16962.1	4	+	2639536	2640626	422	2	Novel_lncRNA	Intergenic LncRNAs	3.34	0.45	-2.89185	3.28629e-06	yes
MSTRG.16963	MSTRG.16963.1	4	-	2640366	2640626	261	1	Novel_lncRNA	Intergenic LncRNAs	6.45	0	-12.6551	2.04946e-10	yes
MSTRG.16967	MSTRG.16967.1	4	+	2750618	2752051	428	2	Novel_lncRNA	Others(sense updown)	1.65	0	-10.6883	0.000115018	yes
MSTRG.16979	MSTRG.16979.1	4	-	2928458	2928716	259	1	Novel_lncRNA	Others(sense updown)	4.32	0	-12.0768	6.10507e-07	yes
MSTRG.16981	MSTRG.16981.1	4	-	2950376	2974049	381	2	Novel_lncRNA	Intergenic LncRNAs	11.77	0.42	-4.80858	2.16026e-26	yes
MSTRG.16983	MSTRG.16983.1	4	+	2998425	2998683	259	1	Novel_lncRNA	Antisense LncRNAs	3.11	0	-11.6027	3.11919e-05	yes
MSTRG.16987	MSTRG.16987.1	4	-	3069738	3069968	231	1	Novel_lncRNA	Intergenic LncRNAs	0.94	0	-9.87652	0.07712
MSTRG.16988	MSTRG.16988.1	4	-	3085346	3085603	258	1	Novel_lncRNA	Intergenic LncRNAs	3.58	0	-11.8057	4.31054e-06	yes
MSTRG.16990	MSTRG.16990.1	4	-	3087469	3087934	466	1	Novel_lncRNA	Intergenic LncRNAs	5.29	0.16	-5.04712	2.2179e-15	yes
MSTRG.16991	MSTRG.16991.2	4	-	3200803	3202153	362	2	Novel_lncRNA	Intergenic LncRNAs	9.69	1.46	-2.73053	2.01373e-13	yes
MSTRG.16991	MSTRG.16991.1	4	-	3200803	3202159	370	2	Novel_lncRNA	Intergenic LncRNAs	30.43	5.67	-2.42407	7.26385e-36	yes
MSTRG.16993	MSTRG.16993.1	4	+	3204156	3204383	228	1	Novel_lncRNA	Antisense LncRNAs	1.43	0	-10.4818	0.0214131	yes
MSTRG.16994	MSTRG.16994.1	4	-	3215139	3215396	258	1	Novel_lncRNA	Intergenic LncRNAs	1.47	0	-10.5216	0.0111518	yes
MSTRG.17000	MSTRG.17000.1	4	+	3289263	3289491	229	1	Novel_lncRNA	Intergenic LncRNAs	0.95	0	-9.89178	0.07712
MSTRG.17001	MSTRG.17001.1	4	+	3321138	3323666	261	2	Novel_lncRNA	Intergenic LncRNAs	2.5	0	-11.2877	0.000219491	yes
MSTRG.17006	MSTRG.17006.1	4	-	3394620	3395683	834	4	Novel_lncRNA	Intergenic LncRNAs	3.38	0.18	-4.23095	4.26295e-15	yes
MSTRG.17007	MSTRG.17007.1	4	-	3396483	3396844	362	1	Novel_lncRNA	Intergenic LncRNAs	1.65	0.1	-4.04439	0.000418506	yes
MSTRG.17016	MSTRG.17016.1	4	-	3557755	3561475	822	3	Novel_lncRNA	Sense LncRNAs	8.19	4.55	-0.847997	9.31499e-06
MSTRG.17020	MSTRG.17020.1	4	-	3588450	3588936	347	2	Novel_lncRNA	Intronic LncRNAs	0.31	2.51	3.01735	0.0014209	yes
MSTRG.17023	MSTRG.17023.1	4	-	3633362	3633808	447	1	Novel_lncRNA	Intergenic LncRNAs	2.06	1.18	-0.803857	0.178072
MSTRG.17026	MSTRG.17026.1	4	-	3713020	3713228	209	1	Novel_lncRNA	Intergenic LncRNAs	1.04	0	-10.0224	0.07712
MSTRG.17035	MSTRG.17035.1	4	+	3835976	3958506	1692	3	Novel_lncRNA	Others(sense updown)	9.4	1.16	-3.01854	1.09752e-63	yes
MSTRG.17048	MSTRG.17048.1	4	-	3960364	3960654	291	1	Novel_lncRNA	Intergenic LncRNAs	2.98	0	-11.5411	1.6231e-05	yes
MSTRG.17049	MSTRG.17049.1	4	+	4019716	4019929	214	1	Novel_lncRNA	Intergenic LncRNAs	0.76	0	-9.56986	0.284393
MSTRG.17053	MSTRG.17053.1	4	-	4099548	4099928	381	1	Novel_lncRNA	Intergenic LncRNAs	2.28	0	-11.1548	1.6231e-05	yes
MSTRG.17060	MSTRG.17060.1	4	+	4205905	4206180	276	1	Novel_lncRNA	Intergenic LncRNAs	32.64	0.55	-5.89107	8.22271e-56	yes
MSTRG.17062	MSTRG.17062.1	4	+	4249660	4249885	226	1	Novel_lncRNA	Intergenic LncRNAs	0.72	0	-9.49185	0.284393
MSTRG.17072	MSTRG.17072.1	4	-	4535257	4535788	532	1	Novel_lncRNA	Antisense LncRNAs	0.92	1.92	1.0614	0.147193
MSTRG.17074	MSTRG.17074.1	4	+	4571378	4572510	475	3	Novel_lncRNA	Intergenic LncRNAs	21.82	0.16	-7.09144	1.76544e-63	yes
MSTRG.17075	MSTRG.17075.1	4	-	4581726	4582252	527	1	Novel_lncRNA	Intergenic LncRNAs	1.54	0.07	-4.45943	3.11919e-05	yes
MSTRG.17079	MSTRG.17079.1	4	+	4672660	4672909	250	1	Novel_lncRNA	Bidirectional LncRNAs	0	1.51	10.5603	0.00579257	yes
MSTRG.17081	MSTRG.17081.1	4	+	4726064	4726362	299	1	Novel_lncRNA	Bidirectional LncRNAs	3.7	0.25	-3.88753	3.60039e-06	yes
MSTRG.17082	MSTRG.17082.1	4	-	4726074	4726414	341	1	Novel_lncRNA	Others(sense updown)	1.55	0.11	-3.81669	0.00157708	yes
MSTRG.17089	MSTRG.17089.1	4	+	4836498	4837305	316	2	Novel_lncRNA	Sense LncRNAs	3.78	0.24	-3.97728	1.95625e-06	yes
MSTRG.17094	MSTRG.17094.1	4	-	4922548	4922818	271	1	Novel_lncRNA	Intergenic LncRNAs	1	0	-9.96578	0.0406196	yes
MSTRG.17098	MSTRG.17098.1	4	+	4972235	4972489	255	1	Novel_lncRNA	Intergenic LncRNAs	3.23	0	-11.6573	3.11919e-05	yes
MSTRG.17102	MSTRG.17102.1	4	+	5040616	5040975	274	2	Novel_lncRNA	Intergenic LncRNAs	0	0.41	8.67948	0.284393
MSTRG.17103	MSTRG.17103.1	4	+	5041563	5042565	1003	1	Novel_lncRNA	Intergenic LncRNAs	1.41	7.65	2.43976	2.15445e-20	yes
MSTRG.17108	MSTRG.17108.3	4	+	5222943	5226725	1356	6	Novel_lncRNA	Sense LncRNAs	5.24	1.95	-1.42609	6.36046e-12	yes
MSTRG.17119	MSTRG.17119.1	4	+	5322160	5322451	292	1	Novel_lncRNA	Bidirectional LncRNAs	2.59	0.13	-4.31637	6.00341e-05	yes
MSTRG.17120	MSTRG.17120.1	4	-	5322184	5322451	268	1	Novel_lncRNA	Others(sense updown)	0.42	0	-8.71425	0.537283
MSTRG.17122	MSTRG.17122.1	4	-	5365397	5366417	265	2	Novel_lncRNA	Intergenic LncRNAs	0.82	0	-9.67948	0.07712
MSTRG.17123	MSTRG.17123.1	4	-	5372419	5372640	222	1	Novel_lncRNA	Intergenic LncRNAs	0.24	0.17	-0.4975	1
MSTRG.17125	MSTRG.17125.1	4	-	5374461	5376895	913	2	Novel_lncRNA	Antisense LncRNAs	5.07	0.21	-4.59352	2.90953e-27	yes
MSTRG.17128	MSTRG.17128.1	4	-	5443853	5444077	225	1	Novel_lncRNA	Bidirectional LncRNAs	0.48	0	-8.90689	0.537283
MSTRG.17133	MSTRG.17133.2	4	+	5515463	5530057	3739	6	Novel_lncRNA	Antisense LncRNAs	3.14	0.35	-3.16534	1.54035e-49	yes
MSTRG.17140	MSTRG.17140.1	4	-	5557152	5557560	409	1	Novel_lncRNA	Intergenic LncRNAs	1.06	0.83	-0.352881	0.671143
MSTRG.17143	MSTRG.17143.1	4	-	5598564	5598794	231	1	Novel_lncRNA	Intergenic LncRNAs	2.58	0.16	-4.01123	0.000418506	yes
MSTRG.17144	MSTRG.17144.1	4	+	5598575	5598794	220	1	Novel_lncRNA	Intergenic LncRNAs	1.51	0	-10.5603	0.0214131	yes
MSTRG.17149	MSTRG.17149.1	4	-	5717992	5718457	466	1	Novel_lncRNA	Others(sense updown)	0.23	1.87	3.02333	0.0014209	yes
MSTRG.17152	MSTRG.17152.1	4	-	5740687	5740970	284	1	Novel_lncRNA	Intergenic LncRNAs	1.34	0	-10.388	0.0111518	yes
MSTRG.17159	MSTRG.17159.1	4	+	5832965	5833355	391	1	Novel_lncRNA	Intergenic LncRNAs	19.15	0.19	-6.6552	4.52192e-46	yes
MSTRG.17164	MSTRG.17164.2	4	+	5849216	5849699	400	2	Novel_lncRNA	Antisense LncRNAs	4.35	0.35	-3.63559	8.79655e-09	yes
MSTRG.17167	MSTRG.17167.1	4	-	5876267	5877241	592	2	Novel_lncRNA	Bidirectional LncRNAs	67.94	81.98	0.271011	0.00612324
MSTRG.17168	MSTRG.17168.1	4	+	5876269	5877240	589	2	Novel_lncRNA	Others(sense updown)	15.8	11.71	-0.432183	0.00241123
MSTRG.17175	MSTRG.17175.1	4	+	6128277	6128504	228	1	Novel_lncRNA	Intergenic LncRNAs	0.95	0	-9.89178	0.07712
MSTRG.17176	MSTRG.17176.1	4	-	6129915	6132255	235	2	Novel_lncRNA	Intergenic LncRNAs	3.35	0	-11.7099	3.11919e-05	yes
MSTRG.17177	MSTRG.17177.1	4	-	6138289	6138699	411	1	Novel_lncRNA	Intergenic LncRNAs	1.58	0	-10.6257	0.000219491	yes
MSTRG.17178	MSTRG.17178.1	4	+	6142617	6142955	339	1	Novel_lncRNA	Intergenic LncRNAs	5.12	0	-12.3219	1.04848e-10	yes
MSTRG.17180	MSTRG.17180.1	4	-	6162508	6162711	204	1	Novel_lncRNA	Intergenic LncRNAs	0.53	0	-9.04985	0.537283
MSTRG.17181	MSTRG.17181.1	4	+	6163725	6164098	374	1	Novel_lncRNA	Intergenic LncRNAs	6.25	1.72	-1.86145	2.90625e-06	yes
MSTRG.17182	MSTRG.17182.2	4	-	6218409	6221278	1331	4	Novel_lncRNA	Intergenic LncRNAs	2.04	0.52	-1.97199	1.76476e-07	yes
MSTRG.17182	MSTRG.17182.1	4	-	6218409	6221278	2182	3	Novel_lncRNA	Intergenic LncRNAs	3.46	1.04	-1.73419	2.00639e-16	yes
MSTRG.17185	MSTRG.17185.1	4	-	6232480	6308772	664	2	Novel_lncRNA	Others(sense updown)	11.61	0.74	-3.9717	7.84822e-40	yes
MSTRG.17196	MSTRG.17196.1	4	+	6305500	6306280	364	2	Novel_lncRNA	Intergenic LncRNAs	0.6	0.1	-2.58496	0.25698
MSTRG.17202	MSTRG.17202.1	4	-	6319407	6320148	742	1	Novel_lncRNA	Intronic LncRNAs	1.02	0.15	-2.76553	0.00211068	yes
MSTRG.17203	MSTRG.17203.1	4	+	6319663	6319898	236	1	Novel_lncRNA	Intronic LncRNAs	1.61	0	-10.6528	0.0111518	yes
MSTRG.17205	MSTRG.17205.1	4	-	6354467	6354836	370	1	Novel_lncRNA	Others(anti down)	3.08	2.45	-0.330149	0.506072
MSTRG.17209	MSTRG.17209.1	4	+	6444529	6444889	361	1	Novel_lncRNA	Intergenic LncRNAs	2.86	0.63	-2.18259	0.000893827	yes
MSTRG.17238	MSTRG.17238.1	4	-	6895352	6895583	232	1	Novel_lncRNA	Intergenic LncRNAs	1.4	0	-10.4512	0.0214131	yes
MSTRG.17239	MSTRG.17239.1	4	+	6896766	7129620	330	2	Novel_lncRNA	Intergenic LncRNAs	10.47	4.38	-1.25726	1.63865e-05	yes
MSTRG.17246	MSTRG.17246.1	4	+	6970845	6974217	3057	2	Novel_lncRNA	Intergenic LncRNAs	2.59	0.51	-2.34438	5.90778e-25	yes
MSTRG.17247	MSTRG.17247.1	4	-	6978853	6979171	319	1	Novel_lncRNA	Intergenic LncRNAs	2.72	0.24	-3.5025	0.000142755	yes
MSTRG.17254	MSTRG.17254.1	4	+	7215987	7216285	299	1	Novel_lncRNA	Intergenic LncRNAs	0.91	0	-9.82972	0.0406196	yes
MSTRG.17272	MSTRG.17272.1	4	+	7264204	7265124	552	3	Novel_lncRNA	Antisense LncRNAs	113.65	11.85	-3.26164	7.69833e-259	yes
MSTRG.17275	MSTRG.17275.1	4	+	7324462	7324799	338	1	Novel_lncRNA	Bidirectional LncRNAs	0.96	0.56	-0.777608	0.587986
MSTRG.17281	MSTRG.17281.1	4	-	7415584	7415870	287	1	Novel_lncRNA	Intergenic LncRNAs	8.56	0	-13.0634	4.34492e-15	yes
MSTRG.17283	MSTRG.17283.1	4	+	7546101	7546358	258	1	Novel_lncRNA	Others(sense updown)	1.68	0.15	-3.48543	0.0290932	yes
MSTRG.17287	MSTRG.17287.1	4	+	7731188	7732414	1137	2	Novel_lncRNA	Sense LncRNAs	4.87	0	-12.2497	1.14444e-33	yes
MSTRG.17292	MSTRG.17292.3	4	+	7744952	7749214	1861	6	Novel_lncRNA	Sense LncRNAs	2.91	1.42	-1.03513	3.51088e-06	yes
MSTRG.17295	MSTRG.17295.1	4	+	7799053	7799456	404	1	Novel_lncRNA	Intergenic LncRNAs	2.55	0.09	-4.82443	1.17037e-06	yes
MSTRG.17296	MSTRG.17296.1	4	+	7809425	7809832	408	1	Novel_lncRNA	Intergenic LncRNAs	2.13	0	-11.0566	1.6231e-05	yes
MSTRG.17298	MSTRG.17298.1	4	-	7829648	7829950	303	1	Novel_lncRNA	Intergenic LncRNAs	38.69	2.62	-3.88432	4.10286e-59	yes
MSTRG.17299	MSTRG.17299.1	4	+	7829648	7829950	303	1	Novel_lncRNA	Intergenic LncRNAs	4.66	0	-12.1861	1.12178e-08	yes
MSTRG.17300	MSTRG.17300.1	4	-	7872870	7873166	297	1	Novel_lncRNA	Intergenic LncRNAs	1.46	1.27	-0.20114	0.86103
MSTRG.17305	MSTRG.17305.1	4	-	8082786	8083064	279	1	Novel_lncRNA	Intergenic LncRNAs	5.63	0	-12.4589	1.51832e-09	yes
MSTRG.17309	MSTRG.17309.2	4	-	8171410	8171793	336	2	Novel_lncRNA	Antisense LncRNAs	5.33	0.45	-3.56614	4.74339e-09	yes
MSTRG.17309	MSTRG.17309.1	4	-	8171410	8171811	402	1	Novel_lncRNA	Antisense LncRNAs	10.4	1.88	-2.46778	4.63665e-14	yes
MSTRG.17310	MSTRG.17310.1	4	-	8185656	8186037	382	1	Novel_lncRNA	Intergenic LncRNAs	2.27	0.1	-4.50462	1.6231e-05	yes
MSTRG.17311	MSTRG.17311.1	4	-	8218896	8438767	446	2	Novel_lncRNA	Intergenic LncRNAs	5.23	0	-12.3526	3.27731e-14	yes
MSTRG.17315	MSTRG.17315.1	4	+	8239560	8239905	346	1	Novel_lncRNA	Intergenic LncRNAs	1.02	0.22	-2.21299	0.0501844
MSTRG.17318	MSTRG.17318.1	4	-	8360059	8360283	225	1	Novel_lncRNA	Intergenic LncRNAs	1.45	0	-10.5018	0.0214131	yes
MSTRG.17321	MSTRG.17321.1	4	-	8389489	8390361	837	2	Novel_lncRNA	Others(sense updown)	1.36	0	-10.4094	6.10507e-07	yes
MSTRG.17325	MSTRG.17325.1	4	+	8406261	8406630	370	1	Novel_lncRNA	Antisense LncRNAs	10.41	0.61	-4.09302	2.57484e-21	yes
MSTRG.17326	MSTRG.17326.1	4	+	8408164	8408406	243	1	Novel_lncRNA	Intergenic LncRNAs	1.56	0	-10.6073	0.0111518	yes
MSTRG.17327	MSTRG.17327.1	4	+	8410023	8411202	390	2	Novel_lncRNA	Antisense LncRNAs	3.1	0.39	-2.99072	6.84185e-06	yes
MSTRG.17330	MSTRG.17330.1	4	+	8424868	8425221	354	1	Novel_lncRNA	Intergenic LncRNAs	8.96	0.21	-5.41504	8.44737e-20	yes
MSTRG.17331	MSTRG.17331.1	4	-	8520426	8520662	237	1	Novel_lncRNA	Intergenic LncRNAs	1.14	0	-10.1548	0.0406196	yes
MSTRG.17342	MSTRG.17342.1	4	-	8860638	8861085	448	1	Novel_lncRNA	Others(anti down),Others(sense updown)	5.57	0.17	-5.03407	1.12863e-15	yes
MSTRG.17343	MSTRG.17343.1	4	+	8861474	8861683	210	1	Novel_lncRNA	Intergenic LncRNAs	0.26	0	-8.02237	1
MSTRG.17344	MSTRG.17344.1	4	-	8861496	8861716	221	1	Novel_lncRNA	Intergenic LncRNAs	0.49	0	-8.93664	0.537283
MSTRG.17346	MSTRG.17346.1	4	-	8908150	8915322	565	2	Novel_lncRNA	Intergenic LncRNAs	90.29	42.89	-1.07392	1.10432e-49	yes
MSTRG.17347	MSTRG.17347.1	4	+	8908150	8915334	577	2	Novel_lncRNA	Intergenic LncRNAs	21.07	67.68	1.68354	8.31349e-59	yes
MSTRG.17351	MSTRG.17351.1	4	-	9004998	9005602	496	2	Novel_lncRNA	Bidirectional LncRNAs	2.42	0.08	-4.91886	1.62126e-07	yes
MSTRG.17356	MSTRG.17356.1	4	+	9022245	9022478	234	1	Novel_lncRNA	Intergenic LncRNAs	2.3	0	-11.1674	0.00157708	yes
MSTRG.17359	MSTRG.17359.1	4	-	9065310	9065920	456	2	Novel_lncRNA	Intergenic LncRNAs	2.26	0.17	-3.73272	1.25726e-05	yes
MSTRG.17366	MSTRG.17366.1	4	+	9202063	9202337	275	1	Novel_lncRNA	Antisense LncRNAs	11.78	0.55	-4.42076	7.2258e-19	yes
MSTRG.17372	MSTRG.17372.1	4	-	9251910	9252339	366	2	Novel_lncRNA	Antisense LncRNAs	7.49	0.1	-6.22689	7.48793e-17	yes
MSTRG.17373	MSTRG.17373.1	4	+	9257495	9260105	1443	4	Novel_lncRNA	Antisense LncRNAs	5.87	3.33	-0.817838	1.20458e-06
MSTRG.17380	MSTRG.17380.1	4	+	9474645	9474886	242	1	Novel_lncRNA	Intergenic LncRNAs	2.24	0.16	-3.80735	0.000820714	yes
MSTRG.17383	MSTRG.17383.1	4	+	9481048	9481552	347	2	Novel_lncRNA	Intergenic LncRNAs	0.38	0.11	-1.7885	0.66687
MSTRG.17389	MSTRG.17389.1	4	-	9547381	9549502	300	2	Novel_lncRNA	Others(anti down)	0.38	0.24	-0.662965	0.66687
MSTRG.17392	MSTRG.17392.1	4	+	9564123	9564352	230	1	Novel_lncRNA	Bidirectional LncRNAs	1.12	0.16	-2.80735	0.14915
MSTRG.17394	MSTRG.17394.1	4	+	9649104	9649626	523	1	Novel_lncRNA	Intergenic LncRNAs	4.46	0	-12.1228	3.27731e-14	yes
MSTRG.17395	MSTRG.17395.1	4	-	9659002	9660231	1230	1	Novel_lncRNA	Others(sense updown)	1.01	0.12	-3.07325	3.76979e-06	yes
MSTRG.17397	MSTRG.17397.1	4	-	9663159	9663369	211	1	Novel_lncRNA	Intergenic LncRNAs	0.51	0	-8.99435	0.537283
MSTRG.17398	MSTRG.17398.1	4	+	9663164	9663425	262	1	Novel_lncRNA	Intergenic LncRNAs	0.21	0	-7.71425	1
MSTRG.17401	MSTRG.17401.1	4	-	9688128	9692819	2525	3	Novel_lncRNA	Intergenic LncRNAs	4.86	0.7	-2.79553	8.82091e-46	yes
MSTRG.17401	MSTRG.17401.2	4	-	9688128	9692819	4116	2	Novel_lncRNA	Intergenic LncRNAs	4.88	0.8	-2.60881	1.44815e-68	yes
MSTRG.17405	MSTRG.17405.1	4	+	9724516	9724853	338	1	Novel_lncRNA	Intergenic LncRNAs	0.96	0.34	-1.4975	0.21273
MSTRG.17407	MSTRG.17407.1	4	-	9790611	9790908	298	1	Novel_lncRNA	Intergenic LncRNAs	3.78	0.13	-4.8618	3.15374e-07	yes
MSTRG.17408	MSTRG.17408.1	4	-	9795894	9796158	265	1	Novel_lncRNA	Intergenic LncRNAs	0.83	0	-9.69697	0.07712
MSTRG.17425	MSTRG.17425.1	4	-	10080619	10080960	342	1	Novel_lncRNA	Intergenic LncRNAs	8.72	0.22	-5.30875	1.27337e-18	yes
MSTRG.17429	MSTRG.17429.1	4	+	10286690	10287500	811	1	Novel_lncRNA	Antisense LncRNAs	1.74	0.09	-4.27302	8.38076e-08	yes
MSTRG.17431	MSTRG.17431.1	4	+	10365837	10366251	415	1	Novel_lncRNA	Others(sense updown)	1.76	0	-10.7814	0.000115018	yes
MSTRG.17437	MSTRG.17437.1	4	+	10420583	10420794	212	1	Novel_lncRNA	Intergenic LncRNAs	0.51	0	-8.99435	0.537283
MSTRG.17438	MSTRG.17438.1	4	+	10490398	10490626	229	1	Novel_lncRNA	Intergenic LncRNAs	6.4	0.17	-5.23447	2.96042e-09	yes
MSTRG.17439	MSTRG.17439.1	4	-	10490434	10490741	308	1	Novel_lncRNA	Intergenic LncRNAs	11.14	0.37	-4.91208	1.44227e-21	yes
MSTRG.17440	MSTRG.17440.5	4	-	10501969	10504563	1020	5	Novel_lncRNA	Sense LncRNAs	5.1	3.87	-0.398164	0.0388786
MSTRG.17441	MSTRG.17441.1	4	+	10534658	10534905	248	1	Novel_lncRNA	Intergenic LncRNAs	1.92	1.22	-0.654225	0.375689
MSTRG.17446	MSTRG.17446.1	4	-	10670826	10671362	537	1	Novel_lncRNA	Intergenic LncRNAs	2.02	0	-10.9801	1.17037e-06	yes
MSTRG.17448	MSTRG.17448.1	4	-	10818840	10819313	389	2	Novel_lncRNA	Intergenic LncRNAs	5.57	0.19	-4.87361	1.26434e-13	yes
MSTRG.17449	MSTRG.17449.1	4	+	10819414	10819678	265	1	Novel_lncRNA	Intergenic LncRNAs	3.61	0.14	-4.6885	4.31054e-06	yes
MSTRG.17450	MSTRG.17450.1	4	-	10819794	10820674	827	2	Novel_lncRNA	Others(sense updown)	0.66	0.05	-3.72247	0.000820714	yes
MSTRG.17462	MSTRG.17462.1	4	+	10992663	10993513	728	2	Novel_lncRNA	Antisense LncRNAs	57.1	6.96	-3.03633	6.74306e-163	yes
MSTRG.17469	MSTRG.17469.1	4	-	11076994	11077548	555	1	Novel_lncRNA	Intergenic LncRNAs	2.2	0	-11.1033	1.62126e-07	yes
MSTRG.17470	MSTRG.17470.1	4	+	11091423	11091643	221	1	Novel_lncRNA	Intergenic LncRNAs	1.23	0	-10.2644	0.0406196	yes
MSTRG.17471	MSTRG.17471.1	4	+	11108739	11109136	398	1	Novel_lncRNA	Intergenic LncRNAs	8.62	0.84	-3.35923	8.05089e-16	yes
MSTRG.17480	MSTRG.17480.1	4	-	11247711	11250425	2715	1	Novel_lncRNA	Antisense LncRNAs	1.46	0.08	-4.18982	6.94141e-22	yes
MSTRG.17480	MSTRG.17480.2	4	-	11247711	11250425	2556	2	Novel_lncRNA	Antisense LncRNAs	2.15	0	-11.0701	2.2665e-33	yes
MSTRG.17480	MSTRG.17480.4	4	-	11252613	11259966	5859	6	Novel_lncRNA	Antisense LncRNAs	13.24	0.85	-3.9613	0	yes
MSTRG.17480	MSTRG.17480.9	4	-	11260435	11262339	801	2	Novel_lncRNA	Sense LncRNAs	2.03	0.85	-1.25594	0.00579257	yes
MSTRG.17482	MSTRG.17482.1	4	+	11304987	11305396	410	1	Novel_lncRNA	Intergenic LncRNAs	1.99	0.09	-4.4667	3.11919e-05	yes
MSTRG.17485	MSTRG.17485.1	4	-	11320556	11321996	536	3	Novel_lncRNA	Others(sense updown)	1.09	2.07	0.925303	0.170908
MSTRG.17485	MSTRG.17485.2	4	-	11320556	11321980	518	2	Novel_lncRNA	Others(sense updown)	15.95	226.24	3.82623	0	yes
MSTRG.17485	MSTRG.17485.5	4	-	11320556	11321980	519	3	Novel_lncRNA	Others(sense updown)	23.59	38.54	0.708181	6.94712e-08
MSTRG.17486	MSTRG.17486.3	4	+	11320556	11321961	501	3	Novel_lncRNA	Others(anti down)	3	1.33	-1.17354	0.0114168	yes
MSTRG.17488	MSTRG.17488.1	4	-	11328402	11328934	363	2	Novel_lncRNA	Others(sense updown),Others(sense updown)	1.64	0	-10.6795	0.000418506	yes
MSTRG.17502	MSTRG.17502.1	4	-	11514149	11514544	396	1	Novel_lncRNA	Intergenic LncRNAs	2.33	0	-11.1861	4.31054e-06	yes
MSTRG.17525	MSTRG.17525.1	4	+	12090398	12090909	512	1	Novel_lncRNA	Intergenic LncRNAs	0.11	0	-6.78136	1
MSTRG.17526	MSTRG.17526.1	4	-	12115327	12115540	214	1	Novel_lncRNA	Intergenic LncRNAs	0.51	0	-8.99435	0.537283
MSTRG.17527	MSTRG.17527.1	4	+	12119366	12119606	241	1	Novel_lncRNA	Intergenic LncRNAs	6.85	0	-12.7419	3.99822e-10	yes
MSTRG.17535	MSTRG.17535.1	4	+	12203860	12206440	995	4	Novel_lncRNA	Antisense LncRNAs	3.11	1.25	-1.31499	3.01205e-05	yes
MSTRG.17548	MSTRG.17548.1	4	-	12598494	12599335	349	2	Novel_lncRNA	Intronic LncRNAs	6.53	0	-12.6729	6.42263e-14	yes
MSTRG.17549	MSTRG.17549.1	4	+	12600061	12600694	353	2	Novel_lncRNA	Others(sense updown)	2	0.11	-4.18442	0.000115018	yes
MSTRG.17552	MSTRG.17552.1	4	-	12654613	12654923	311	1	Novel_lncRNA	Intergenic LncRNAs	1.74	0.12	-3.85798	0.000820714	yes
MSTRG.17554	MSTRG.17554.1	4	+	12688408	12688663	256	1	Novel_lncRNA	Antisense LncRNAs	402.15	5.32	-6.24016	0	yes
MSTRG.17555	MSTRG.17555.1	4	-	12692039	12692266	228	1	Novel_lncRNA	Bidirectional LncRNAs	1.19	0	-10.2167	0.0406196	yes
MSTRG.17557	MSTRG.17557.1	4	-	12842765	12843387	623	1	Novel_lncRNA	Intergenic LncRNAs	0.35	0.06	-2.54432	0.25698
MSTRG.17565	MSTRG.17565.1	4	+	12959874	12966444	261	2	Novel_lncRNA	Antisense LncRNAs	5.41	0	-12.4014	1.12178e-08	yes
MSTRG.17568	MSTRG.17568.1	4	+	12968325	12968593	269	1	Novel_lncRNA	Intergenic LncRNAs	4.24	0.14	-4.92057	3.15374e-07	yes
MSTRG.17604	MSTRG.17604.1	4	+	13653677	13654328	652	1	Novel_lncRNA	Intergenic LncRNAs	3.16	1.04	-1.60334	6.034e-05	yes
MSTRG.17606	MSTRG.17606.1	4	-	13664543	13664843	301	1	Novel_lncRNA	Intergenic LncRNAs	0.8	1.58	0.981853	0.508789
MSTRG.17607	MSTRG.17607.1	4	+	13671809	13672027	219	1	Novel_lncRNA	Intergenic LncRNAs	1.24	0	-10.2761	0.0406196	yes
MSTRG.17615	MSTRG.17615.1	4	+	13879604	13879859	256	1	Novel_lncRNA	Intergenic LncRNAs	0.54	0	-9.07682	0.284393
MSTRG.17616	MSTRG.17616.1	4	+	13882551	13883183	221	2	Novel_lncRNA	Intergenic LncRNAs	0.27	0	-8.07682	1
MSTRG.17618	MSTRG.17618.1	4	+	13897314	13897847	265	2	Novel_lncRNA	Intergenic LncRNAs	1.02	0	-9.99435	0.0406196	yes
MSTRG.17619	MSTRG.17619.1	4	+	13898694	13899753	452	2	Novel_lncRNA	Intergenic LncRNAs	0.36	0.08	-2.16993	0.421081
MSTRG.17621	MSTRG.17621.1	4	+	13977610	13977834	225	1	Novel_lncRNA	Intergenic LncRNAs	0.48	0	-8.90689	0.537283
MSTRG.17623	MSTRG.17623.1	4	-	14070608	14070887	280	1	Novel_lncRNA	Intergenic LncRNAs	1.91	0.37	-2.36798	0.0182764	yes
MSTRG.17624	MSTRG.17624.1	4	+	14143728	14149467	383	2	Novel_lncRNA	Intergenic LncRNAs	4.53	0	-12.1453	1.04848e-10	yes
MSTRG.17625	MSTRG.17625.1	4	+	14157796	14158079	284	1	Novel_lncRNA	Intergenic LncRNAs	3.63	0	-11.8258	2.23847e-06	yes
MSTRG.17630	MSTRG.17630.1	4	-	14257577	14257862	286	1	Novel_lncRNA	Intergenic LncRNAs	1.52	0.13	-3.54749	0.0290932	yes
MSTRG.17635	MSTRG.17635.1	4	-	14460961	14461261	301	1	Novel_lncRNA	Others(anti down)	1.98	0.13	-3.92892	0.000418506	yes
MSTRG.17643	MSTRG.17643.1	4	-	14552620	14552897	278	1	Novel_lncRNA	Intergenic LncRNAs	3.32	0.27	-3.62015	4.26473e-05	yes
MSTRG.17646	MSTRG.17646.1	4	+	14595808	14596102	295	1	Novel_lncRNA	Intergenic LncRNAs	3.86	0	-11.9144	6.10507e-07	yes
MSTRG.17650	MSTRG.17650.1	4	-	14599172	14599385	214	1	Novel_lncRNA	Intergenic LncRNAs	0.25	0	-7.96578	1
MSTRG.17653	MSTRG.17653.1	4	+	14620702	14620918	217	1	Novel_lncRNA	Intergenic LncRNAs	0.75	0	-9.55075	0.284393
MSTRG.17662	MSTRG.17662.1	4	+	14707438	14715098	2115	2	Novel_lncRNA	Intergenic LncRNAs	13.98	5.4	-1.37233	2.78992e-43	yes
MSTRG.17673	MSTRG.17673.1	4	+	14816420	14816898	479	1	Novel_lncRNA	Antisense LncRNAs	6.54	0.08	-6.35315	3.27632e-19	yes
MSTRG.17677	MSTRG.17677.1	4	+	14876053	14876361	283	2	Novel_lncRNA	Antisense LncRNAs	5.56	0	-12.4409	1.51832e-09	yes
MSTRG.17679	MSTRG.17679.1	4	+	14883986	14884464	479	1	Novel_lncRNA	Intergenic LncRNAs	1.7	0	-10.7313	3.11919e-05	yes
MSTRG.17683	MSTRG.17683.1	4	-	14909249	14909481	233	1	Novel_lncRNA	Intergenic LncRNAs	6.72	12.69	0.917159	0.0107524
MSTRG.17684	MSTRG.17684.1	4	-	14910056	14910546	491	1	Novel_lncRNA	Intergenic LncRNAs	1.99	0.08	-4.63662	2.23847e-06	yes
MSTRG.17690	MSTRG.17690.1	4	-	14997520	14997821	302	1	Novel_lncRNA	Bidirectional LncRNAs	116.63	29.67	-1.97486	6.88874e-84	yes
MSTRG.17691	MSTRG.17691.1	4	+	14997520	14998495	976	1	Novel_lncRNA	Others(sense updown)	4.39	0.62	-2.82388	5.5548e-17	yes
MSTRG.17698	MSTRG.17698.1	4	-	15031850	15032068	219	1	Novel_lncRNA	Antisense LncRNAs	1.49	0	-10.5411	0.0214131	yes
MSTRG.17704	MSTRG.17704.1	4	+	15152976	15153194	219	1	Novel_lncRNA	Intergenic LncRNAs	0.5	0	-8.96578	0.537283
MSTRG.17725	MSTRG.17725.1	4	+	15366499	15367269	771	1	Novel_lncRNA	Antisense LncRNAs	8.31	5.64	-0.559153	0.00223096
MSTRG.17733	MSTRG.17733.1	4	+	15457089	15457368	280	1	Novel_lncRNA	Intergenic LncRNAs	1.16	0.81	-0.518131	0.819673
MSTRG.17746	MSTRG.17746.1	4	-	15671118	15671444	327	1	Novel_lncRNA	Intergenic LncRNAs	1.16	0.12	-3.27302	0.0501844
MSTRG.17756	MSTRG.17756.1	4	+	15829989	15831717	1729	1	Novel_lncRNA	Intronic LncRNAs	9.07	0.35	-4.69568	1.21555e-90	yes
MSTRG.17757	MSTRG.17757.1	4	+	15832577	15832965	389	1	Novel_lncRNA	Intergenic LncRNAs	4.32	0.19	-4.50696	1.80497e-09	yes
MSTRG.17755	MSTRG.17755.3	4	+	15833133	15841492	7282	2	Novel_lncRNA	Sense LncRNAs	0.77	0.06	-3.68182	2.29075e-28	yes
MSTRG.17755	MSTRG.17755.2	4	+	15833133	15841492	8190	2	Novel_lncRNA	Sense LncRNAs	3.45	0.49	-2.81574	6.66531e-104	yes
MSTRG.17765	MSTRG.17765.1	4	+	15929459	15929673	215	1	Novel_lncRNA	Intergenic LncRNAs	2.27	0	-11.1485	0.00302028	yes
MSTRG.17773	MSTRG.17773.1	4	+	16001608	16001929	322	1	Novel_lncRNA	Intergenic LncRNAs	0.84	0	-9.71425	0.0406196	yes
MSTRG.17775	MSTRG.17775.1	4	-	16011789	16012029	241	1	Novel_lncRNA	Intergenic LncRNAs	2.46	0	-11.2644	0.000418506	yes
MSTRG.17784	MSTRG.17784.1	4	-	16146828	16147213	342	2	Novel_lncRNA	Others(sense updown)	0.63	0	-9.29921	0.07712
MSTRG.17802	MSTRG.17802.3	4	-	16351820	16353927	1608	3	Novel_lncRNA	Sense LncRNAs	5.95	1.35	-2.13993	1.71621e-26	yes
MSTRG.17813	MSTRG.17813.1	4	-	16462145	16463660	462	3	Novel_lncRNA	Sense LncRNAs	6.5	10.56	0.700098	0.0100892
MSTRG.17822	MSTRG.17822.11	4	-	16555625	16559110	2810	2	Novel_lncRNA	Sense LncRNAs	2.61	0	-11.3498	1.34837e-44	yes
MSTRG.17840	MSTRG.17840.1	4	-	16677507	16677895	298	2	Novel_lncRNA	Intergenic LncRNAs	1.2	0	-10.2288	0.0111518	yes
MSTRG.17852	MSTRG.17852.1	4	-	16775990	16777222	1233	1	Novel_lncRNA	Antisense LncRNAs	26.76	1.13	-4.56568	1.90464e-184	yes
MSTRG.17894	MSTRG.17894.1	4	+	17285582	17287183	687	2	Novel_lncRNA	Sense LncRNAs	0.87	1.27	0.545741	0.537283
MSTRG.17895	MSTRG.17895.1	4	-	17286652	17287092	441	1	Novel_lncRNA	Others(anti down)	4.06	2.31	-0.813587	0.0371086
MSTRG.17898	MSTRG.17898.1	4	+	17326414	17326625	212	1	Novel_lncRNA	Intergenic LncRNAs	2.82	0	-11.4615	0.000418506	yes
MSTRG.17899	MSTRG.17899.1	4	+	17331493	17331718	226	1	Novel_lncRNA	Others(anti down)	55.95	0	-15.7719	5.22532e-77	yes
MSTRG.17930	MSTRG.17930.1	4	+	17613506	17613927	422	1	Novel_lncRNA	Intergenic LncRNAs	3.6	1.07	-1.75039	0.000469508	yes
MSTRG.17947	MSTRG.17947.1	4	+	17780346	17780738	245	2	Novel_lncRNA	Others(sense updown)	4.65	0	-12.183	6.10507e-07	yes
MSTRG.17948	MSTRG.17948.1	4	-	17781240	17781474	235	1	Novel_lncRNA	Bidirectional LncRNAs	3	0	-11.5507	0.000115018	yes
MSTRG.17959	MSTRG.17959.1	4	+	17879258	17879596	339	1	Novel_lncRNA	Antisense LncRNAs	1.76	0	-10.7814	0.000418506	yes
MSTRG.17970	MSTRG.17970.1	4	-	17974334	17974601	268	1	Novel_lncRNA	Others(sense updown)	1.82	0	-10.8297	0.00302028	yes
MSTRG.17978	MSTRG.17978.1	4	-	18092758	18093049	292	1	Novel_lncRNA	Intergenic LncRNAs	3.84	0.13	-4.88452	3.15374e-07	yes
MSTRG.17980	MSTRG.17980.5	4	+	18125027	18128225	1070	2	Novel_lncRNA	Others(sense updown)	11.56	0.53	-4.44701	7.8428e-69	yes
MSTRG.17980	MSTRG.17980.8	4	+	18125786	18127130	1224	2	Novel_lncRNA	Sense LncRNAs	3.07	0.27	-3.50721	1.06056e-17	yes
MSTRG.17980	MSTRG.17980.6	4	+	18125786	18128225	311	2	Novel_lncRNA	Others(sense updown)	7.86	0.36	-4.44846	5.52997e-14	yes
MSTRG.17980	MSTRG.17980.9	4	+	18128429	18261078	360	2	Novel_lncRNA	Intergenic LncRNAs	3.23	0.29	-3.47741	1.95625e-06	yes
MSTRG.17986	MSTRG.17986.1	4	-	18160534	18161402	766	2	Novel_lncRNA	Intergenic LncRNAs	2.9	0.2	-3.85798	1.68715e-11	yes
MSTRG.17999	MSTRG.17999.1	4	+	18270901	18271561	661	1	Novel_lncRNA	Intergenic LncRNAs	1.81	0.92	-0.976284	0.0437682
MSTRG.18007	MSTRG.18007.1	4	+	18331003	18331491	489	1	Novel_lncRNA	Antisense LncRNAs	2	0.15	-3.73697	2.31723e-05	yes
MSTRG.18012	MSTRG.18012.2	4	+	18358476	18361973	2959	2	Novel_lncRNA	Sense LncRNAs	2.14	0.48	-2.1565	2.50124e-18	yes
MSTRG.18012	MSTRG.18012.3	4	+	18358476	18361973	2781	4	Novel_lncRNA	Sense LncRNAs	3.85	1.05	-1.87447	3.01189e-25	yes
MSTRG.18023	MSTRG.18023.1	4	-	18446331	18447537	1142	2	Novel_lncRNA	Others(sense updown)	3.36	1.62	-1.05247	7.77067e-05	yes
MSTRG.18023	MSTRG.18023.2	4	-	18446331	18447537	1153	2	Novel_lncRNA	Others(sense updown)	2.09	1.25	-0.741575	0.0214131
MSTRG.18053	MSTRG.18053.1	4	-	18636179	18636433	255	1	Novel_lncRNA	Intergenic LncRNAs	1.27	0.15	-3.08179	0.0860559
MSTRG.18064	MSTRG.18064.1	4	-	18741417	18741707	291	1	Novel_lncRNA	Intergenic LncRNAs	19.21	0.78	-4.62224	1.25237e-31	yes
MSTRG.18068	MSTRG.18068.1	4	-	18771455	18771849	395	1	Novel_lncRNA	Intergenic LncRNAs	2.06	0.1	-4.36457	3.11919e-05	yes
MSTRG.18070	MSTRG.18070.1	4	-	18806975	18807214	240	1	Novel_lncRNA	Intergenic LncRNAs	1.58	0.16	-3.30378	0.0501844
MSTRG.18087	MSTRG.18087.1	4	+	18891473	18892483	968	2	Novel_lncRNA	Others(sense updown)	0.45	1.37	1.60618	0.00950353	yes
MSTRG.18109	MSTRG.18109.1	4	-	19063858	19064397	520	2	Novel_lncRNA	Intergenic LncRNAs	2.3	0.58	-1.98751	0.000897026	yes
MSTRG.18113	MSTRG.18113.1	4	-	19097597	19109202	1998	4	Novel_lncRNA	Antisense LncRNAs	2.12	2.1	-0.0136749	0.815373
MSTRG.18114	MSTRG.18114.1	4	-	19114820	19115078	259	1	Novel_lncRNA	Intergenic LncRNAs	1.89	0.44	-2.10281	0.0303785	yes
MSTRG.18115	MSTRG.18115.1	4	-	19115754	19116046	293	1	Novel_lncRNA	Intergenic LncRNAs	5.56	0.77	-2.85215	8.58857e-07	yes
MSTRG.18132	MSTRG.18132.1	4	-	19223545	19231671	803	2	Novel_lncRNA	Antisense LncRNAs	9	5.67	-0.666576	0.000156566
MSTRG.18132	MSTRG.18132.2	4	-	19225959	19231682	5681	2	Novel_lncRNA	Antisense LncRNAs	1.96	0.36	-2.44478	1.00455e-35	yes
MSTRG.18135	MSTRG.18135.1	4	+	19254936	19255156	221	1	Novel_lncRNA	Intergenic LncRNAs	2.35	0.68	-1.78905	0.0735304
MSTRG.18145	MSTRG.18145.1	4	+	19331685	19332034	350	1	Novel_lncRNA	Intergenic LncRNAs	0.31	3.13	3.33582	5.5702e-05	yes
MSTRG.18161	MSTRG.18161.1	4	+	19480399	19486740	3043	7	Novel_lncRNA	Antisense LncRNAs	3.91	0.19	-4.3631	5.42226e-66	yes
MSTRG.18175	MSTRG.18175.1	4	+	19609946	19610713	768	1	Novel_lncRNA	Intronic LncRNAs	1.63	0.34	-2.26127	0.000211173	yes
MSTRG.18186	MSTRG.18186.1	4	-	19656364	19657003	640	1	Novel_lncRNA	Intergenic LncRNAs	441.45	548.02	0.311979	2.53468e-13
MSTRG.18187	MSTRG.18187.1	4	+	19656380	19656994	615	1	Novel_lncRNA	Intergenic LncRNAs	4.15	17.64	2.08767	1.27782e-23	yes
MSTRG.18188	MSTRG.18188.1	4	+	19657882	19658444	563	1	Novel_lncRNA	Intergenic LncRNAs	2.31	0.4	-2.52982	3.96399e-05	yes
MSTRG.18194	MSTRG.18194.1	4	+	19707532	19713588	795	3	Novel_lncRNA	Antisense LncRNAs	2.66	0.48	-2.47032	1.92963e-07	yes
MSTRG.18206	MSTRG.18206.1	4	+	19784323	19784679	357	1	Novel_lncRNA	Intergenic LncRNAs	1.56	0.54	-1.53051	0.0939404
MSTRG.18217	MSTRG.18217.1	4	+	19864295	19865057	763	1	Novel_lncRNA	Intergenic LncRNAs	1.35	1.04	-0.376376	0.482024
MSTRG.18218	MSTRG.18218.1	4	+	19872672	19873410	739	1	Novel_lncRNA	Intergenic LncRNAs	3.89	0.1	-5.2817	4.91482e-18	yes
MSTRG.18220	MSTRG.18220.1	4	-	19880207	19880474	268	1	Novel_lncRNA	Intronic LncRNAs	3.24	0.14	-4.5325	1.6231e-05	yes
MSTRG.18230	MSTRG.18230.1	4	+	19955236	19955506	271	1	Novel_lncRNA	Intergenic LncRNAs	1	0	-9.96578	0.0406196	yes
MSTRG.18240	MSTRG.18240.1	4	-	20015753	20017657	856	3	Novel_lncRNA	Sense LncRNAs	6.91	5.65	-0.290435	0.0850587
MSTRG.18241	MSTRG.18241.1	4	-	20020519	20020864	346	1	Novel_lncRNA	Intergenic LncRNAs	5.65	0.55	-3.36075	2.81753e-09	yes
MSTRG.18248	MSTRG.18248.5	4	+	20078422	20081004	1518	6	Novel_lncRNA	Sense LncRNAs	9.15	1.08	-3.08274	2.98436e-57	yes
MSTRG.18259	MSTRG.18259.1	4	-	20180697	20180927	231	1	Novel_lncRNA	Antisense LncRNAs	3.29	0.16	-4.36194	6.00341e-05	yes
MSTRG.18267	MSTRG.18267.2	4	-	20239335	20242258	2565	4	Novel_lncRNA	Sense LncRNAs	5.81	0.2	-4.86047	4.75878e-89	yes
MSTRG.18271	MSTRG.18271.1	4	-	20271773	20272575	803	1	Novel_lncRNA	Bidirectional LncRNAs	3.85	0	-11.9106	1.27337e-18	yes
MSTRG.18294	MSTRG.18294.1	4	-	20455693	20456016	324	1	Novel_lncRNA	Intronic LncRNAs	3.52	1.87	-0.912537	0.0894939
MSTRG.18308	MSTRG.18308.1	4	+	20590266	20590531	266	1	Novel_lncRNA	Antisense LncRNAs	5.51	0.85	-2.69652	7.81484e-06	yes
MSTRG.18312	MSTRG.18312.1	4	-	20606862	20609996	1317	4	Novel_lncRNA	Sense LncRNAs	28.97	6.4	-2.17842	1.21879e-102	yes
MSTRG.18336	MSTRG.18336.1	4	-	20814937	20817777	551	2	Novel_lncRNA	Sense LncRNAs	18	2.78	-2.69484	1.81768e-35	yes
MSTRG.18340	MSTRG.18340.1	4	-	20822782	20822996	215	1	Novel_lncRNA	Antisense LncRNAs	2.27	0	-11.1485	0.00302028	yes
MSTRG.18392	MSTRG.18392.2	4	+	21262522	21262836	315	1	Novel_lncRNA	Antisense LncRNAs	1.38	3.48	1.33442	0.0527727
MSTRG.18445	MSTRG.18445.1	4	+	21779794	21780508	528	2	Novel_lncRNA	Others(anti down)	2.78	0	-11.4409	5.76571e-09	yes
MSTRG.18451	MSTRG.18451.1	4	+	21825002	21825349	348	1	Novel_lncRNA	Intergenic LncRNAs	3.19	0.63	-2.34013	0.000322604	yes
MSTRG.18452	MSTRG.18452.1	4	-	21825008	21825340	333	1	Novel_lncRNA	Intergenic LncRNAs	5.83	0.11	-5.72792	3.66857e-12	yes
MSTRG.18453	MSTRG.18453.1	4	+	21827353	21827630	278	1	Novel_lncRNA	Intergenic LncRNAs	13.38	0.82	-4.02831	2.4048e-19	yes
MSTRG.18454	MSTRG.18454.1	4	-	21827353	21827623	271	1	Novel_lncRNA	Intergenic LncRNAs	1.64	0	-10.6795	0.00579257	yes
MSTRG.18458	MSTRG.18458.1	4	-	21875815	21876363	549	1	Novel_lncRNA	Antisense LncRNAs	5.96	0	-12.5411	8.44737e-20	yes
MSTRG.18460	MSTRG.18460.1	4	+	21877401	21877811	411	1	Novel_lncRNA	Intergenic LncRNAs	2.01	0	-10.973	3.11919e-05	yes
MSTRG.18470	MSTRG.18470.1	4	+	21942443	21942989	547	1	Novel_lncRNA	Intergenic LncRNAs	0.1	1.24	3.63227	0.00362633	yes
MSTRG.18472	MSTRG.18472.1	4	+	21961979	22023844	465	2	Novel_lncRNA	Intergenic LncRNAs	4.43	0.24	-4.2062	1.02697e-11	yes
MSTRG.18477	MSTRG.18477.1	4	-	21988229	21988525	297	1	Novel_lncRNA	Intergenic LncRNAs	1.79	0.17	-3.39635	0.00933621	yes
MSTRG.18505	MSTRG.18505.1	4	-	22240494	22240749	256	1	Novel_lncRNA	Intergenic LncRNAs	6.91	0.15	-5.52565	5.38068e-11	yes
MSTRG.18511	MSTRG.18511.1	4	+	22295496	22296607	1112	1	Novel_lncRNA	Antisense LncRNAs	1.22	0.14	-3.12338	1.16729e-06	yes
MSTRG.18528	MSTRG.18528.1	4	+	22380943	22381517	575	1	Novel_lncRNA	Intergenic LncRNAs	0	2.89	11.4969	4.98345e-10	yes
MSTRG.18574	MSTRG.18574.1	4	+	22747678	22749483	1278	2	Novel_lncRNA	Bidirectional LncRNAs	5.81	0.15	-5.2755	2.30406e-46	yes
MSTRG.18576	MSTRG.18576.1	4	+	22768751	22769523	666	2	Novel_lncRNA	Intergenic LncRNAs	0.9	0	-9.81378	0.000418506	yes
MSTRG.18579	MSTRG.18579.1	4	-	22817939	22818335	397	1	Novel_lncRNA	Others(anti down)	1.09	0	-10.0901	0.00579257	yes
MSTRG.18612	MSTRG.18612.1	4	+	23143111	23143343	233	1	Novel_lncRNA	Others(sense updown),Others(sense updown)	2.79	0.49	-2.50941	0.0061894	yes
MSTRG.18615	MSTRG.18615.1	4	-	23161600	23161902	303	1	Novel_lncRNA	Intergenic LncRNAs	0.36	0.5	0.473931	1
MSTRG.18616	MSTRG.18616.1	4	-	23162696	23163039	268	2	Novel_lncRNA	Intergenic LncRNAs	1.82	0	-10.8297	0.00302028	yes
MSTRG.18617	MSTRG.18617.1	4	+	23162705	23163048	344	1	Novel_lncRNA	Intergenic LncRNAs	2.52	0.22	-3.51785	0.000142755	yes
MSTRG.18633	MSTRG.18633.1	4	+	23285199	23285587	389	1	Novel_lncRNA	Intergenic LncRNAs	2.23	0	-11.1228	1.6231e-05	yes
MSTRG.18634	MSTRG.18634.1	4	-	23285299	23285588	290	1	Novel_lncRNA	Intergenic LncRNAs	3.56	0	-11.7977	2.23847e-06	yes
MSTRG.18635	MSTRG.18635.2	4	-	23287812	23293178	476	2	Novel_lncRNA	Sense LncRNAs	0.23	0	-7.84549	0.537283
MSTRG.18646	MSTRG.18646.1	4	-	23365773	23366035	263	1	Novel_lncRNA	Intergenic LncRNAs	1.44	0.57	-1.33703	0.265994
MSTRG.18687	MSTRG.18687.2	4	+	23714574	23716241	1177	2	Novel_lncRNA	Sense LncRNAs	12.78	1.36	-3.23221	1.55036e-64	yes
MSTRG.18699	MSTRG.18699.1	4	+	23794076	23839325	368	2	Novel_lncRNA	Others(lnc(mRNA))	3.39	0	-11.7271	1.62126e-07	yes
MSTRG.18713	MSTRG.18713.1	4	+	23884437	23885333	225	2	Novel_lncRNA	Intronic LncRNAs	0.77	0	-9.58871	0.14915
MSTRG.18713	MSTRG.18713.2	4	+	23884437	23885333	225	2	Novel_lncRNA	Intronic LncRNAs	0.77	0	-9.58871	0.14915
MSTRG.18714	MSTRG.18714.1	4	-	23884441	23885333	221	2	Novel_lncRNA	Intronic LncRNAs	0.98	0	-9.93664	0.07712
MSTRG.18714	MSTRG.18714.2	4	-	23884441	23885333	221	2	Novel_lncRNA	Intronic LncRNAs	0.98	0	-9.93664	0.07712
MSTRG.18712	MSTRG.18712.3	4	+	23886141	23887744	870	4	Novel_lncRNA	Sense LncRNAs	7.28	0.27	-4.75291	9.25204e-38	yes
MSTRG.18712	MSTRG.18712.4	4	+	23886141	23887744	895	4	Novel_lncRNA	Sense LncRNAs	10.02	0.75	-3.73985	3.77594e-44	yes
MSTRG.18747	MSTRG.18747.1	4	+	24360612	24360822	211	1	Novel_lncRNA	Intergenic LncRNAs	2.04	0	-10.9944	0.00579257	yes
MSTRG.18766	MSTRG.18766.1	4	+	24596171	24596486	316	1	Novel_lncRNA	Intergenic LncRNAs	0.86	0	-9.74819	0.0406196	yes
MSTRG.18781	MSTRG.18781.1	4	-	24696714	24698960	715	4	Novel_lncRNA	Sense LncRNAs	3.36	7.89	1.23156	2.17346e-06	yes
MSTRG.18789	MSTRG.18789.1	4	-	24797223	24797460	238	1	Novel_lncRNA	Intergenic LncRNAs	0.91	0.32	-1.50779	0.25698
MSTRG.18806	MSTRG.18806.1	4	-	24997753	24998042	290	1	Novel_lncRNA	Antisense LncRNAs	1.31	0	-10.3554	0.0111518	yes
MSTRG.18816	MSTRG.18816.1	4	-	25065328	25065681	256	2	Novel_lncRNA	Others(sense updown)	1.27	0.3	-2.08179	0.0860559
MSTRG.18832	MSTRG.18832.1	4	-	25172164	25173079	916	1	Novel_lncRNA	Intergenic LncRNAs	2.58	0.04	-6.01123	8.55277e-15	yes
MSTRG.18833	MSTRG.18833.1	4	+	25172547	25173153	607	1	Novel_lncRNA	Intergenic LncRNAs	3.22	0.12	-4.74595	3.66857e-12	yes
MSTRG.18879	MSTRG.18879.1	4	-	25676687	25676990	304	1	Novel_lncRNA	Intergenic LncRNAs	1.25	0.12	-3.38082	0.0501844
MSTRG.18890	MSTRG.18890.1	4	-	25763237	25763468	232	1	Novel_lncRNA	Intergenic LncRNAs	2.57	0	-11.3276	0.000418506	yes
MSTRG.18922	MSTRG.18922.1	4	-	26004829	26005069	241	1	Novel_lncRNA	Intergenic LncRNAs	8.17	0.81	-3.33434	2.81753e-09	yes
MSTRG.18933	MSTRG.18933.1	4	+	26118297	26125713	5878	4	Novel_lncRNA	Sense LncRNAs	2.98	0.53	-2.49125	7.91904e-57	yes
MSTRG.18939	MSTRG.18939.1	4	+	26166854	26168001	1148	1	Novel_lncRNA	Antisense LncRNAs	4.18	0.13	-5.00692	4.05423e-30	yes
MSTRG.18946	MSTRG.18946.1	4	+	26213122	26214018	897	1	Novel_lncRNA	Antisense LncRNAs	2.12	0.13	-4.02748	1.37208e-10	yes
MSTRG.19011	MSTRG.19011.1	4	+	26662056	26662433	378	1	Novel_lncRNA	Bidirectional LncRNAs	0.57	1.5	1.39593	0.117157
MSTRG.19016	MSTRG.19016.1	4	-	26739041	26740027	867	3	Novel_lncRNA	Intergenic LncRNAs	2.75	2.05	-0.423808	0.169881
MSTRG.19044	MSTRG.19044.1	4	+	26957328	26957745	418	1	Novel_lncRNA	Intergenic LncRNAs	2.21	0.18	-3.61798	4.26473e-05	yes
MSTRG.19059	MSTRG.19059.1	4	-	27042008	27042232	225	1	Novel_lncRNA	Antisense LncRNAs	0	0.34	8.40939	0.537283
MSTRG.19066	MSTRG.19066.1	4	+	27090026	27090317	292	1	Novel_lncRNA	Intergenic LncRNAs	2.97	0	-11.5362	1.6231e-05	yes
MSTRG.19067	MSTRG.19067.1	4	-	27090036	27090240	205	1	Novel_lncRNA	Intergenic LncRNAs	0.26	0	-8.02237	1
MSTRG.19080	MSTRG.19080.1	4	+	27179035	27179319	285	1	Novel_lncRNA	Intergenic LncRNAs	0.76	1.99	1.3887	0.117157
MSTRG.19093	MSTRG.19093.1	4	+	27262732	27264350	247	2	Novel_lncRNA	Intergenic LncRNAs	2.63	0	-11.3608	0.000219491	yes
MSTRG.19119	MSTRG.19119.1	4	+	27429494	27431159	433	2	Novel_lncRNA	Intergenic LncRNAs	4.89	0.17	-4.84623	2.47938e-13	yes
MSTRG.19120	MSTRG.19120.1	4	-	27432818	27433130	313	1	Novel_lncRNA	Intergenic LncRNAs	1.04	0.24	-2.11548	0.0860559
MSTRG.19123	MSTRG.19123.1	4	+	27460916	27462528	225	2	Novel_lncRNA	Antisense LncRNAs	762.16	83.33	-3.19319	0	yes
MSTRG.19126	MSTRG.19126.2	4	+	27471521	27474525	922	3	Novel_lncRNA	Antisense LncRNAs	2.93	0	-11.5167	1.47718e-16	yes
MSTRG.19127	MSTRG.19127.1	4	+	27475151	27475357	207	1	Novel_lncRNA	Intronic LncRNAs	0.26	0	-8.02237	1
MSTRG.19128	MSTRG.19128.1	4	-	27475166	27475385	220	1	Novel_lncRNA	Intronic LncRNAs	0.99	0	-9.95128	0.07712
MSTRG.19142	MSTRG.19142.1	4	+	27574809	27575309	501	1	Novel_lncRNA	Intergenic LncRNAs	2.71	0.15	-4.17526	1.6074e-07	yes
MSTRG.19172	MSTRG.19172.1	4	+	27702139	27702800	548	2	Novel_lncRNA	Intergenic LncRNAs	1.88	0.07	-4.74723	1.17037e-06	yes
MSTRG.19182	MSTRG.19182.1	4	+	27745901	27746311	411	1	Novel_lncRNA	Bidirectional LncRNAs	3.17	0.18	-4.13841	3.01019e-07	yes
MSTRG.19229	MSTRG.19229.1	4	+	28045454	28046372	738	2	Novel_lncRNA	Intronic LncRNAs	20	1.74	-3.52284	8.02164e-69	yes
MSTRG.19230	MSTRG.19230.1	4	-	28046718	28047099	382	1	Novel_lncRNA	Intronic LncRNAs	89.01	23.26	-1.93612	3.89153e-79	yes
MSTRG.19231	MSTRG.19231.1	4	+	28046761	28047018	258	1	Novel_lncRNA	Intronic LncRNAs	5.68	0.44	-3.69032	3.47123e-07	yes
MSTRG.19232	MSTRG.19232.1	4	+	28048186	28050486	934	4	Novel_lncRNA	Others(sense updown),Others(sense updown)	3.95	0.61	-2.69497	8.98409e-14	yes
MSTRG.19234	MSTRG.19234.1	4	-	28052083	28052526	330	2	Novel_lncRNA	Bidirectional LncRNAs	9.04	3.32	-1.44514	1.00006e-05	yes
MSTRG.19235	MSTRG.19235.2	4	-	28052629	28055383	934	3	Novel_lncRNA	Antisense LncRNAs	5.51	1.26	-2.12863	9.32617e-15	yes
MSTRG.19235	MSTRG.19235.3	4	-	28052629	28055383	934	3	Novel_lncRNA	Antisense LncRNAs	5.51	1.26	-2.12863	9.32617e-15	yes
MSTRG.19235	MSTRG.19235.4	4	-	28052629	28055383	934	3	Novel_lncRNA	Antisense LncRNAs	5.51	1.26	-2.12863	9.32617e-15	yes
MSTRG.19235	MSTRG.19235.1	4	-	28052629	28055383	934	2	Novel_lncRNA	Antisense LncRNAs	5.51	1.26	-2.12863	9.32617e-15	yes
MSTRG.19237	MSTRG.19237.2	4	+	28053411	28057044	1346	4	Novel_lncRNA	Sense LncRNAs	6.31	1.49	-2.08233	6.31774e-23	yes
MSTRG.19238	MSTRG.19238.1	4	-	28055487	28055804	318	1	Novel_lncRNA	Intronic LncRNAs	23.38	0.59	-5.30842	2.30406e-46	yes
MSTRG.19239	MSTRG.19239.1	4	+	28055487	28055804	318	1	Novel_lncRNA	Intronic LncRNAs	10.92	0.36	-4.92283	7.30172e-22	yes
MSTRG.19240	MSTRG.19240.1	4	-	28057240	28058226	852	2	Novel_lncRNA	Others(anti down)	36.37	4.68	-2.95817	1.5712e-119	yes
MSTRG.19241	MSTRG.19241.1	4	+	28057240	28058805	1431	2	Novel_lncRNA	Others(sense updown),Others(anti down),Others(sense updown)	19.42	2.17	-3.16178	3.85965e-115	yes
MSTRG.19242	MSTRG.19242.1	4	-	28058517	28058814	298	1	Novel_lncRNA	Bidirectional LncRNAs	12.02	0	-13.5531	7.30172e-22	yes
MSTRG.19246	MSTRG.19246.1	4	-	28062083	28063902	1013	4	Novel_lncRNA	Antisense LncRNAs	10.71	1.27	-3.07606	1.21545e-44	yes
MSTRG.19247	MSTRG.19247.1	4	+	28064003	28064681	498	2	Novel_lncRNA	Others(sense updown)	16.02	2.28	-2.81277	2.33437e-30	yes
MSTRG.19248	MSTRG.19248.1	4	-	28064003	28064583	400	2	Novel_lncRNA	Others(anti down)	6.92	0.76	-3.1867	3.74083e-12	yes
MSTRG.19249	MSTRG.19249.1	4	-	28066061	28066336	276	1	Novel_lncRNA	Intergenic LncRNAs	2.95	0	-11.5265	3.11919e-05	yes
MSTRG.19250	MSTRG.19250.1	4	+	28066061	28066320	260	1	Novel_lncRNA	Intergenic LncRNAs	0.21	0	-7.71425	1
MSTRG.19287	MSTRG.19287.1	4	-	28371099	28371382	284	1	Novel_lncRNA	Intergenic LncRNAs	12.06	0.13	-6.53557	5.64554e-21	yes
MSTRG.19295	MSTRG.19295.1	4	+	28434800	28435012	213	1	Novel_lncRNA	Intergenic LncRNAs	0.25	0	-7.96578	1
MSTRG.19369	MSTRG.19369.1	4	+	29162373	29162858	486	1	Novel_lncRNA	Antisense LncRNAs	0.56	0	-9.12928	0.0406196	yes
MSTRG.19382	MSTRG.19382.1	4	+	29208447	29208829	262	2	Novel_lncRNA	Others(anti down)	6.27	0.14	-5.48497	2.04946e-10	yes
MSTRG.19469	MSTRG.19469.3	4	-	29845778	29846082	305	1	Novel_lncRNA	Sense LncRNAs	9.61	1.86	-2.36923	5.49668e-10	yes
MSTRG.19508	MSTRG.19508.1	4	-	30155791	30170702	814	2	Novel_lncRNA	Intergenic LncRNAs	0.87	0	-9.76487	0.000115018	yes
MSTRG.19561	MSTRG.19561.1	5	-	47951	48202	252	1	Novel_lncRNA	Intergenic LncRNAs	0.22	0	-7.78136	1
MSTRG.19566	MSTRG.19566.1	5	+	78716	78932	217	1	Novel_lncRNA	Intergenic LncRNAs	1.25	0	-10.2877	0.0406196	yes
MSTRG.19582	MSTRG.19582.1	5	-	188398	188716	319	1	Novel_lncRNA	Antisense LncRNAs	0.68	1.66	1.28758	0.170894
MSTRG.19592	MSTRG.19592.1	5	+	238352	238577	226	1	Novel_lncRNA	Others(sense updown)	0.72	0.17	-2.08246	0.421081
MSTRG.19618	MSTRG.19618.1	5	+	443915	444997	563	3	Novel_lncRNA	Sense LncRNAs	11.95	10.21	-0.227028	0.127618
MSTRG.19665	MSTRG.19665.2	5	-	814981	816574	888	3	Novel_lncRNA	Sense LncRNAs	2.02	0.21	-3.26589	3.08978e-08	yes
MSTRG.19673	MSTRG.19673.1	5	+	908598	910834	571	2	Novel_lncRNA	Sense LncRNAs	9.56	8.09	-0.240871	0.14843
MSTRG.19711	MSTRG.19711.1	5	+	1272365	1272871	507	1	Novel_lncRNA	Others(sense updown)	3.75	0.22	-4.09132	1.37208e-10	yes
MSTRG.19712	MSTRG.19712.1	5	-	1288378	1293600	3396	2	Novel_lncRNA	Others(sense updown)	0.05	1.44	4.848	5.40868e-24	yes
MSTRG.19722	MSTRG.19722.1	5	+	1393979	1399193	3575	3	Novel_lncRNA	Sense LncRNAs	3.03	0.72	-2.07325	4.50065e-29	yes
MSTRG.19760	MSTRG.19760.1	5	+	1722445	1722700	256	1	Novel_lncRNA	Others(sense updown)	4.24	0	-12.0498	1.17037e-06	yes
MSTRG.19762	MSTRG.19762.1	5	-	1726833	1727315	483	1	Novel_lncRNA	Intergenic LncRNAs	2.92	0.08	-5.18982	5.76571e-09	yes
MSTRG.19763	MSTRG.19763.1	5	+	1728885	1729114	230	1	Novel_lncRNA	Others(sense updown)	0.94	0	-9.87652	0.07712
MSTRG.19770	MSTRG.19770.1	5	-	1779292	1779519	228	1	Novel_lncRNA	Intergenic LncRNAs	0.24	0	-7.90689	1
MSTRG.19779	MSTRG.19779.1	5	-	1875497	1875712	216	1	Novel_lncRNA	Intergenic LncRNAs	10.22	10.47	0.0348662	1
MSTRG.19787	MSTRG.19787.3	5	+	1963403	1965857	1431	6	Novel_lncRNA	Antisense LncRNAs	2.53	1.16	-1.12501	5.84759e-05	yes
MSTRG.19825	MSTRG.19825.1	5	-	2393135	2393395	261	1	Novel_lncRNA	Intergenic LncRNAs	0.21	0	-7.71425	1
MSTRG.19826	MSTRG.19826.1	5	+	2393139	2393399	261	1	Novel_lncRNA	Intergenic LncRNAs	0.62	0	-9.27612	0.284393
MSTRG.19867	MSTRG.19867.2	5	+	2668775	2670938	446	3	Novel_lncRNA	Sense LncRNAs	5.32	1.95	-1.44795	8.85996e-05	yes
MSTRG.19871	MSTRG.19871.1	5	-	2685316	2689784	3313	2	Novel_lncRNA	Antisense LncRNAs	61.66	22.2	-1.47378	5.60793e-287	yes
MSTRG.19880	MSTRG.19880.2	5	-	2769903	2771102	761	3	Novel_lncRNA	Sense LncRNAs	4.06	0	-11.9873	1.27337e-18	yes
MSTRG.19905	MSTRG.19905.1	5	-	3040151	3045267	1035	2	Novel_lncRNA	Antisense LncRNAs	4.93	3.62	-0.445598	0.0239772
MSTRG.19907	MSTRG.19907.1	5	-	3076333	3076601	269	1	Novel_lncRNA	Intergenic LncRNAs	2.37	0	-11.2107	0.000418506	yes
MSTRG.19918	MSTRG.19918.1	5	-	3217109	3217838	730	1	Novel_lncRNA	Antisense LncRNAs	0.89	0.21	-2.08342	0.0180341	yes
MSTRG.19954	MSTRG.19954.2	5	+	3569077	3574989	5913	1	Novel_lncRNA	Antisense LncRNAs	4.26	1.06	-2.00679	4.3613e-62	yes
MSTRG.19957	MSTRG.19957.1	5	-	3585083	3585602	357	2	Novel_lncRNA	Intergenic LncRNAs	0.91	0.21	-2.11548	0.0860559
MSTRG.19958	MSTRG.19958.1	5	+	3585392	3585602	211	1	Novel_lncRNA	Intergenic LncRNAs	1.01	0	-9.98014	0.07712
MSTRG.19959	MSTRG.19959.1	5	+	3586016	3586317	302	1	Novel_lncRNA	Intergenic LncRNAs	2.7	0.13	-4.37638	3.11919e-05	yes
MSTRG.19960	MSTRG.19960.1	5	-	3586028	3586321	294	1	Novel_lncRNA	Intergenic LncRNAs	3.14	0.26	-3.59418	4.26473e-05	yes
MSTRG.19961	MSTRG.19961.1	5	+	3589246	3589467	222	1	Novel_lncRNA	Intergenic LncRNAs	0.73	0	-9.51175	0.284393
MSTRG.19963	MSTRG.19963.1	5	-	3619148	3619387	240	1	Novel_lncRNA	Intergenic LncRNAs	1050.57	0.95	-10.111	0	yes
MSTRG.19965	MSTRG.19965.1	5	-	3619983	3620227	245	1	Novel_lncRNA	Intergenic LncRNAs	55.38	1.85	-4.90377	6.26513e-81	yes
MSTRG.19966	MSTRG.19966.1	5	-	3632671	3670831	310	2	Novel_lncRNA	Others(sense updown),Others(sense updown)	16.63	0	-14.0215	2.65904e-31	yes
MSTRG.19970	MSTRG.19970.1	5	-	3667045	3667541	329	2	Novel_lncRNA	Intergenic LncRNAs	6.43	0	-12.6506	4.84924e-13	yes
MSTRG.19982	MSTRG.19982.1	5	+	3743670	3745029	959	2	Novel_lncRNA	Bidirectional LncRNAs	2.49	0.95	-1.39015	0.000115018	yes
MSTRG.19995	MSTRG.19995.1	5	-	3878887	3880439	444	5	Novel_lncRNA	Sense LncRNAs	0.14	0.1	-0.485427	1
MSTRG.20001	MSTRG.20001.1	5	+	4034850	4035071	222	1	Novel_lncRNA	Intergenic LncRNAs	1.44	0	-10.4919	0.0214131	yes
MSTRG.20002	MSTRG.20002.1	5	+	4040587	4040838	252	1	Novel_lncRNA	Intergenic LncRNAs	0.43	0	-8.74819	0.537283
MSTRG.20018	MSTRG.20018.1	5	-	4164976	4167522	2506	2	Novel_lncRNA	Sense LncRNAs	10.2	6.77	-0.591341	6.34731e-11
MSTRG.20021	MSTRG.20021.1	5	+	4174276	4174570	295	1	Novel_lncRNA	Antisense LncRNAs	5.52	0.51	-3.4361	3.01674e-08	yes
MSTRG.20027	MSTRG.20027.1	5	-	4239624	4239970	268	2	Novel_lncRNA	Intergenic LncRNAs	1.42	0.14	-3.34239	0.0501844
MSTRG.20028	MSTRG.20028.1	5	-	4240795	4241099	305	1	Novel_lncRNA	Intergenic LncRNAs	1.42	0	-10.4717	0.00579257	yes
MSTRG.20041	MSTRG.20041.1	5	-	4398549	4401573	1111	5	Novel_lncRNA	Sense LncRNAs	1.37	1.6	0.223896	0.861695
MSTRG.20044	MSTRG.20044.1	5	-	4415188	4417501	2314	1	Novel_lncRNA	Antisense LncRNAs	0.66	3.68	2.47917	4.49088e-23	yes
MSTRG.20058	MSTRG.20058.1	5	+	4506925	4507329	405	1	Novel_lncRNA	Intergenic LncRNAs	5.97	0.37	-4.01213	1.34257e-12	yes
MSTRG.20059	MSTRG.20059.1	5	-	4507025	4507329	305	1	Novel_lncRNA	Intergenic LncRNAs	0.36	0	-8.49185	0.537283
MSTRG.20060	MSTRG.20060.1	5	+	4510493	4510974	353	2	Novel_lncRNA	Antisense LncRNAs	2.46	0.11	-4.48308	1.6231e-05	yes
MSTRG.20067	MSTRG.20067.1	5	-	4652019	4652267	249	1	Novel_lncRNA	Intergenic LncRNAs	0.87	0	-9.76487	0.07712
MSTRG.20068	MSTRG.20068.1	5	-	4653993	4654230	238	1	Novel_lncRNA	Antisense LncRNAs	0.33	0	-8.36632	0.537283
MSTRG.20074	MSTRG.20074.5	5	-	4722791	4732358	990	7	Novel_lncRNA	Sense LncRNAs	3.16	0.34	-3.21632	3.10405e-14	yes
MSTRG.20075	MSTRG.20075.1	5	-	4734465	4734967	503	1	Novel_lncRNA	Intergenic LncRNAs	1.19	0	-10.2167	0.000418506	yes
MSTRG.20088	MSTRG.20088.2	5	+	4894256	4900699	582	3	Novel_lncRNA	Sense LncRNAs	3.02	0.46	-2.71484	6.43433e-07	yes
MSTRG.20090	MSTRG.20090.1	5	-	4912178	4912495	318	1	Novel_lncRNA	Bidirectional LncRNAs	1.02	0	-9.99435	0.0214131	yes
MSTRG.20092	MSTRG.20092.1	5	-	4963716	4963999	284	1	Novel_lncRNA	Intergenic LncRNAs	3.06	2.26	-0.437209	0.537283
MSTRG.20093	MSTRG.20093.1	5	+	4971323	4971699	377	1	Novel_lncRNA	Intergenic LncRNAs	2.68	0.29	-3.20811	7.0502e-05	yes
MSTRG.20103	MSTRG.20103.1	5	+	5159153	5161920	480	2	Novel_lncRNA	Intergenic LncRNAs	6.11	0.71	-3.10528	6.22436e-13	yes
MSTRG.20104	MSTRG.20104.1	5	+	5162115	5163474	920	2	Novel_lncRNA	Intergenic LncRNAs	3.66	0	-11.8376	2.18588e-20	yes
MSTRG.20108	MSTRG.20108.1	5	-	5243853	5244379	346	2	Novel_lncRNA	Intergenic LncRNAs	6.27	0.98	-2.67761	3.07746e-08	yes
MSTRG.20120	MSTRG.20120.1	5	+	5452504	5452717	214	1	Novel_lncRNA	Intergenic LncRNAs	0.25	0	-7.96578	1
MSTRG.20121	MSTRG.20121.1	5	-	5452534	5452762	229	1	Novel_lncRNA	Intergenic LncRNAs	1.66	0	-10.697	0.0111518	yes
MSTRG.20192	MSTRG.20192.2	5	+	6555561	6626013	1201	3	Novel_lncRNA	Sense LncRNAs	3.61	0.75	-2.26704	3.4334e-13	yes
MSTRG.20198	MSTRG.20198.1	5	+	6590443	6590875	433	1	Novel_lncRNA	Bidirectional LncRNAs	2.88	0	-11.4919	1.62126e-07	yes
MSTRG.20216	MSTRG.20216.1	5	-	6724236	6725220	637	2	Novel_lncRNA	Intergenic LncRNAs	9.63	0.06	-7.32643	8.45179e-38	yes
MSTRG.20226	MSTRG.20226.1	5	-	6902996	6903324	329	1	Novel_lncRNA	Antisense LncRNAs	7	0	-12.7731	3.27731e-14	yes
MSTRG.20240	MSTRG.20240.1	5	-	7218757	7219191	435	1	Novel_lncRNA	Intergenic LncRNAs	1.5	0.09	-4.05889	0.000219491	yes
MSTRG.20252	MSTRG.20252.1	5	-	7418147	7421289	2869	4	Novel_lncRNA	Antisense LncRNAs	12.33	0.04	-8.26796	4.15594e-214	yes
MSTRG.20253	MSTRG.20253.1	5	-	7445271	7445520	250	1	Novel_lncRNA	Intergenic LncRNAs	0.43	0	-8.74819	0.537283
MSTRG.20254	MSTRG.20254.1	5	+	7489237	7489524	288	1	Novel_lncRNA	Intergenic LncRNAs	7.73	0.53	-3.8664	1.68715e-11	yes
MSTRG.20255	MSTRG.20255.1	5	-	7493710	7494451	494	2	Novel_lncRNA	Intergenic LncRNAs	3.19	1.53	-1.06002	0.0214131	yes
MSTRG.20257	MSTRG.20257.1	5	-	7529406	7529617	212	1	Novel_lncRNA	Intergenic LncRNAs	0.52	0	-9.02237	0.537283
MSTRG.20258	MSTRG.20258.1	5	+	7542486	7542877	392	1	Novel_lncRNA	Intergenic LncRNAs	1.25	0.48	-1.38082	0.14346
MSTRG.20259	MSTRG.20259.1	5	+	7557620	7557910	291	1	Novel_lncRNA	Intergenic LncRNAs	1.77	0	-10.7895	0.00157708	yes
MSTRG.20260	MSTRG.20260.1	5	-	7557650	7557900	251	1	Novel_lncRNA	Intergenic LncRNAs	1.08	0.6	-0.847997	0.544753
MSTRG.20266	MSTRG.20266.1	5	+	7666616	7667418	803	1	Novel_lncRNA	Antisense LncRNAs	18.01	6.26	-1.52456	1.69134e-25	yes
MSTRG.20269	MSTRG.20269.1	5	-	7742679	7743659	981	1	Novel_lncRNA	Intergenic LncRNAs	1.22	0	-10.2527	3.15374e-07	yes
MSTRG.20279	MSTRG.20279.1	5	+	7899391	7900848	1435	2	Novel_lncRNA	Antisense LncRNAs	3.64	0.29	-3.64981	3.54832e-25	yes
MSTRG.20277	MSTRG.20277.2	5	-	7899997	7900930	911	2	Novel_lncRNA	Sense LncRNAs	2.84	0.13	-4.44931	7.75644e-15	yes
MSTRG.20291	MSTRG.20291.1	5	+	8110548	8110759	212	1	Novel_lncRNA	Intergenic LncRNAs	1.54	0	-10.5887	0.0214131	yes
MSTRG.20292	MSTRG.20292.1	5	+	8117239	8117451	213	1	Novel_lncRNA	Others(sense updown),Others(sense updown)	0.25	0.18	-0.473931	1
MSTRG.20296	MSTRG.20296.1	5	+	8130398	8130631	234	1	Novel_lncRNA	Intergenic LncRNAs	1.84	0	-10.8455	0.00579257	yes
MSTRG.20299	MSTRG.20299.1	5	+	8219774	8220061	288	1	Novel_lncRNA	Intergenic LncRNAs	4.63	0	-12.1768	4.27987e-08	yes
MSTRG.20301	MSTRG.20301.1	5	+	8303493	8303794	302	1	Novel_lncRNA	Antisense LncRNAs	1.08	0	-10.0768	0.0214131	yes
MSTRG.20308	MSTRG.20308.1	5	+	8406895	8407673	779	1	Novel_lncRNA	Intergenic LncRNAs	3.13	0	-11.6119	4.34492e-15	yes
MSTRG.20319	MSTRG.20319.1	5	+	8630009	8630355	227	2	Novel_lncRNA	Antisense LncRNAs	0.51	0	-8.99435	0.537283
MSTRG.20322	MSTRG.20322.1	5	-	8648012	8648330	319	1	Novel_lncRNA	Antisense LncRNAs	0.68	0	-9.40939	0.07712
MSTRG.20325	MSTRG.20325.5	5	+	8681822	8682492	218	4	Novel_lncRNA	Sense LncRNAs	0.25	0.17	-0.556393	1
MSTRG.20326	MSTRG.20326.1	5	-	8698298	8698618	321	1	Novel_lncRNA	Intergenic LncRNAs	1.35	0	-10.3987	0.00579257	yes
MSTRG.20327	MSTRG.20327.1	5	+	8698315	8698592	278	1	Novel_lncRNA	Intergenic LncRNAs	4.1	0.27	-3.92459	3.60039e-06	yes
MSTRG.20332	MSTRG.20332.1	5	-	8843950	8844749	800	1	Novel_lncRNA	Bidirectional LncRNAs	1.76	0	-10.7814	1.12178e-08	yes
MSTRG.20333	MSTRG.20333.1	5	-	8963460	8963712	253	1	Novel_lncRNA	Intergenic LncRNAs	1.07	0	-10.0634	0.0406196	yes
MSTRG.20335	MSTRG.20335.1	5	+	8975320	8975569	250	1	Novel_lncRNA	Intergenic LncRNAs	2.17	0	-11.0835	0.00157708	yes
MSTRG.20337	MSTRG.20337.1	5	-	9029753	9030150	398	1	Novel_lncRNA	Intergenic LncRNAs	5.73	0.09	-5.99247	3.27731e-14	yes
MSTRG.20338	MSTRG.20338.1	5	-	9043604	9043805	202	1	Novel_lncRNA	Intergenic LncRNAs	1.16	0	-10.1799	0.07712
MSTRG.20339	MSTRG.20339.1	5	+	9043607	9043842	236	1	Novel_lncRNA	Intergenic LncRNAs	0.69	0	-9.43045	0.284393
MSTRG.20340	MSTRG.20340.1	5	+	9046076	9124359	379	4	Novel_lncRNA	Intergenic LncRNAs	2.58	0.77	-1.74444	0.00874805	yes
MSTRG.20341	MSTRG.20341.1	5	-	9046517	9074628	336	2	Novel_lncRNA	Intergenic LncRNAs	0.32	0	-8.32193	0.537283
MSTRG.20342	MSTRG.20342.1	5	+	9086725	9087617	297	2	Novel_lncRNA	Intergenic LncRNAs	9.17	0	-13.1627	7.48793e-17	yes
MSTRG.20346	MSTRG.20346.1	5	-	9157815	9158486	672	1	Novel_lncRNA	Intergenic LncRNAs	4.68	0.23	-4.3468	2.72941e-18	yes
MSTRG.20348	MSTRG.20348.1	5	-	9205973	9206194	222	1	Novel_lncRNA	Intergenic LncRNAs	1.96	0	-10.9366	0.00579257	yes
MSTRG.20350	MSTRG.20350.1	5	-	9222527	9222752	226	1	Novel_lncRNA	Intergenic LncRNAs	1.2	0	-10.2288	0.0406196	yes
MSTRG.20351	MSTRG.20351.1	5	+	9235035	9235277	243	1	Novel_lncRNA	Intergenic LncRNAs	0.15	0	-7.22882	1
MSTRG.20355	MSTRG.20355.1	5	-	9283037	9283415	379	1	Novel_lncRNA	Intergenic LncRNAs	11.19	2.25	-2.31421	3.05442e-13	yes
MSTRG.20359	MSTRG.20359.1	5	-	9342931	9343130	200	1	Novel_lncRNA	Intergenic LncRNAs	1.36	0	-10.4094	0.0406196	yes
MSTRG.20362	MSTRG.20362.1	5	+	9423029	9423396	368	1	Novel_lncRNA	Intergenic LncRNAs	4.14	0.1	-5.37156	1.51832e-09	yes
MSTRG.20363	MSTRG.20363.1	5	-	9423038	9423291	254	1	Novel_lncRNA	Intergenic LncRNAs	3.2	0	-11.6439	3.11919e-05	yes
MSTRG.20369	MSTRG.20369.1	5	+	9491140	9491361	222	1	Novel_lncRNA	Intergenic LncRNAs	2.2	0	-11.1033	0.00302028	yes
MSTRG.20371	MSTRG.20371.1	5	-	9515553	9515859	307	1	Novel_lncRNA	Intergenic LncRNAs	1.25	0	-10.2877	0.0111518	yes
MSTRG.20379	MSTRG.20379.1	5	-	9629130	9629381	252	1	Novel_lncRNA	Intergenic LncRNAs	1.94	0	-10.9218	0.00302028	yes
MSTRG.20393	MSTRG.20393.1	5	+	9809979	9810210	232	1	Novel_lncRNA	Intergenic LncRNAs	1.17	0	-10.1923	0.0406196	yes
MSTRG.20394	MSTRG.20394.1	5	+	9817627	9818382	756	1	Novel_lncRNA	Others(sense updown)	3.01	1.5	-1.0048	0.00332384	yes
MSTRG.20406	MSTRG.20406.1	5	+	10017689	10018013	325	1	Novel_lncRNA	Intergenic LncRNAs	5.53	0	-12.4331	5.38068e-11	yes
MSTRG.20407	MSTRG.20407.1	5	-	10017717	10017998	282	1	Novel_lncRNA	Intergenic LncRNAs	5.97	0.54	-3.4667	1.62204e-08	yes
MSTRG.20417	MSTRG.20417.1	5	+	10362487	10362689	203	1	Novel_lncRNA	Intergenic LncRNAs	0.99	0	-9.95128	0.14915
MSTRG.20419	MSTRG.20419.2	5	-	10396481	10398063	883	5	Novel_lncRNA	Sense LncRNAs	1.41	0	-10.4615	1.62126e-07	yes
MSTRG.20420	MSTRG.20420.1	5	-	10407848	10408115	268	1	Novel_lncRNA	Intergenic LncRNAs	0.41	0	-8.67948	0.537283
MSTRG.20421	MSTRG.20421.1	5	-	10504968	10526429	1218	2	Novel_lncRNA	Bidirectional LncRNAs	0	1.4	10.4512	4.98345e-10	yes
MSTRG.20427	MSTRG.20427.1	5	+	10592770	10592974	205	1	Novel_lncRNA	Intergenic LncRNAs	0.26	1.11	2.09398	0.25698
MSTRG.20429	MSTRG.20429.1	5	-	10717129	10717420	292	1	Novel_lncRNA	Intergenic LncRNAs	0.93	0	-9.86109	0.0406196	yes
MSTRG.20434	MSTRG.20434.1	5	+	10774111	10774407	297	1	Novel_lncRNA	Antisense LncRNAs	0.37	0	-8.53138	0.537283
MSTRG.20438	MSTRG.20438.1	5	+	10859199	10859489	291	1	Novel_lncRNA	Intergenic LncRNAs	2.98	0	-11.5411	1.6231e-05	yes
MSTRG.20439	MSTRG.20439.1	5	+	10863099	10863717	619	1	Novel_lncRNA	Intergenic LncRNAs	2.98	0.61	-2.28843	2.55023e-06	yes
MSTRG.20440	MSTRG.20440.1	5	+	10865965	10866182	218	1	Novel_lncRNA	Intergenic LncRNAs	1.74	0.17	-3.35548	0.0501844
MSTRG.20442	MSTRG.20442.1	5	+	10884558	10884762	205	1	Novel_lncRNA	Intergenic LncRNAs	0.53	0	-9.04985	0.537283
MSTRG.20452	MSTRG.20452.1	5	+	11043352	11043868	517	1	Novel_lncRNA	Intergenic LncRNAs	196.08	29.83	-2.71661	0	yes
MSTRG.20453	MSTRG.20453.1	5	-	11043354	11043863	510	1	Novel_lncRNA	Intergenic LncRNAs	41.5	17.49	-1.24658	2.09788e-27	yes
MSTRG.20456	MSTRG.20456.1	5	-	11045684	11048525	617	2	Novel_lncRNA	Others(sense updown),Others(anti down)	4.49	0	-12.1325	7.48793e-17	yes
MSTRG.20459	MSTRG.20459.1	5	+	11052048	11052294	247	1	Novel_lncRNA	Bidirectional LncRNAs	0.22	0.31	0.494765	1
MSTRG.20460	MSTRG.20460.1	5	+	11052731	11053545	283	2	Novel_lncRNA	Intergenic LncRNAs	0.38	0	-8.56986	0.537283
MSTRG.20462	MSTRG.20462.2	5	+	11060765	11068389	5999	9	Novel_lncRNA	Sense LncRNAs	2.67	0.2	-3.73877	4.131e-78	yes
MSTRG.20471	MSTRG.20471.1	5	-	11184796	11185338	543	1	Novel_lncRNA	Intergenic LncRNAs	13.57	5.64	-1.26665	1.58183e-10	yes
MSTRG.20472	MSTRG.20472.1	5	-	11190401	11190609	209	1	Novel_lncRNA	Intergenic LncRNAs	0.26	0	-8.02237	1
MSTRG.20498	MSTRG.20498.1	5	+	11672366	11672703	338	1	Novel_lncRNA	Intergenic LncRNAs	1.28	0	-10.3219	0.00579257	yes
MSTRG.20506	MSTRG.20506.1	5	-	11742824	11743065	242	1	Novel_lncRNA	Others(sense updown)	2.14	1.25	-0.775683	0.375689
MSTRG.20516	MSTRG.20516.1	5	+	12011099	12011505	407	1	Novel_lncRNA	Intergenic LncRNAs	2.93	0	-11.5167	3.15374e-07	yes
MSTRG.20518	MSTRG.20518.1	5	-	12030185	12030586	402	1	Novel_lncRNA	Others(sense updown)	0.27	0	-8.07682	0.537283
MSTRG.20519	MSTRG.20519.1	5	-	12031734	12032400	667	1	Novel_lncRNA	Intergenic LncRNAs	0.65	0.06	-3.43741	0.0290932	yes
MSTRG.20520	MSTRG.20520.1	5	-	12032760	12033182	423	1	Novel_lncRNA	Intergenic LncRNAs	4.11	0	-12.0049	1.04848e-10	yes
MSTRG.20527	MSTRG.20527.1	5	+	12149335	12149620	286	1	Novel_lncRNA	Intergenic LncRNAs	2.97	0.78	-1.92892	0.00642701	yes
MSTRG.20528	MSTRG.20528.1	5	+	12157207	12157644	438	1	Novel_lncRNA	Antisense LncRNAs	13.63	0.09	-7.24264	1.2858e-36	yes
MSTRG.20532	MSTRG.20532.2	5	-	12232514	12234654	320	2	Novel_lncRNA	Intergenic LncRNAs	2.4	0.06	-5.32193	6.00341e-05	yes
MSTRG.20549	MSTRG.20549.1	5	+	12413084	12413455	372	1	Novel_lncRNA	Intergenic LncRNAs	1.9	0.51	-1.89743	0.0262699	yes
MSTRG.20550	MSTRG.20550.1	5	+	12414561	12414794	234	1	Novel_lncRNA	Intergenic LncRNAs	0.23	0	-7.84549	1
MSTRG.20553	MSTRG.20553.1	5	+	12477154	12477419	266	1	Novel_lncRNA	Intergenic LncRNAs	1.84	0.12	-3.9386	0.00302028	yes
MSTRG.20554	MSTRG.20554.1	5	-	12482739	12482956	218	1	Novel_lncRNA	Intergenic LncRNAs	3.5	0	-11.7731	6.00341e-05	yes
MSTRG.20558	MSTRG.20558.1	5	+	12525198	12525402	205	1	Novel_lncRNA	Intergenic LncRNAs	1.85	0	-10.8533	0.0111518	yes
MSTRG.20559	MSTRG.20559.1	5	-	12529622	12530231	610	1	Novel_lncRNA	Others(sense updown)	12.19	0.56	-4.44413	8.82395e-42	yes
MSTRG.20567	MSTRG.20567.1	5	-	12684416	12684931	516	1	Novel_lncRNA	Intergenic LncRNAs	0.74	0	-9.53138	0.0111518	yes
MSTRG.20576	MSTRG.20576.1	5	-	12799386	12799677	205	2	Novel_lncRNA	Others(sense updown)	2.12	0	-11.0498	0.00579257	yes
MSTRG.20578	MSTRG.20578.1	5	+	12800087	12800395	309	1	Novel_lncRNA	Antisense LncRNAs	2.81	0.12	-4.54946	1.6231e-05	yes
MSTRG.20580	MSTRG.20580.1	5	-	12842037	12842239	203	1	Novel_lncRNA	Intergenic LncRNAs	0.16	0.18	0.169925	1
MSTRG.20581	MSTRG.20581.1	5	-	12882998	13146771	606	2	Novel_lncRNA	Intergenic LncRNAs	3.87	1.84	-1.07263	0.00246627	yes
MSTRG.20584	MSTRG.20584.1	5	-	12911949	12912633	438	2	Novel_lncRNA	Sense LncRNAs	0.62	0.09	-2.78427	0.14915
MSTRG.20585	MSTRG.20585.1	5	+	12921384	12922310	927	1	Novel_lncRNA	Intronic LncRNAs	2.22	0.08	-4.79442	4.84924e-13	yes
MSTRG.20606	MSTRG.20606.1	5	+	13103606	13103978	373	1	Novel_lncRNA	Intergenic LncRNAs	2.84	0.1	-4.82782	1.17037e-06	yes
MSTRG.20607	MSTRG.20607.1	5	+	13124770	13125091	322	1	Novel_lncRNA	Intergenic LncRNAs	3.64	0	-11.8297	3.15374e-07	yes
MSTRG.20608	MSTRG.20608.1	5	-	13147030	13147313	284	1	Novel_lncRNA	Intergenic LncRNAs	10.87	9.45	-0.201966	0.371728
MSTRG.20609	MSTRG.20609.1	5	+	13170646	13170909	264	1	Novel_lncRNA	Intergenic LncRNAs	1.03	0	-10.0084	0.0406196	yes
MSTRG.20616	MSTRG.20616.1	5	-	13331346	13339919	496	2	Novel_lncRNA	Others(sense updown)	2.52	0.08	-4.97728	8.36921e-08	yes
MSTRG.20618	MSTRG.20618.1	5	+	13372053	13372368	316	1	Novel_lncRNA	Antisense LncRNAs	4.48	0	-12.1293	1.12178e-08	yes
MSTRG.20623	MSTRG.20623.1	5	-	13482420	13482660	241	1	Novel_lncRNA	Intergenic LncRNAs	7.43	0.78	-3.25182	3.08978e-08	yes
MSTRG.20624	MSTRG.20624.1	5	+	13482452	13482660	209	1	Novel_lncRNA	Intergenic LncRNAs	0.78	0	-9.60733	0.284393
MSTRG.20627	MSTRG.20627.2	5	+	13510648	13511509	809	2	Novel_lncRNA	Sense LncRNAs	0.87	0.56	-0.635589	0.370261
MSTRG.20633	MSTRG.20633.1	5	-	13733508	13733777	270	1	Novel_lncRNA	Intergenic LncRNAs	0.6	0.14	-2.09954	0.421081
MSTRG.20635	MSTRG.20635.1	5	+	13760800	13762201	1402	1	Novel_lncRNA	Intergenic LncRNAs	2.09	3.1	0.568765	0.0540896
MSTRG.20636	MSTRG.20636.1	5	+	13774239	13774480	242	1	Novel_lncRNA	Intergenic LncRNAs	2.59	0.16	-4.01681	0.000418506	yes
MSTRG.20637	MSTRG.20637.1	5	-	13774281	13774483	203	1	Novel_lncRNA	Intergenic LncRNAs	0.53	0	-9.04985	0.537283
MSTRG.20648	MSTRG.20648.1	5	-	13917701	13917940	240	1	Novel_lncRNA	Intergenic LncRNAs	0.23	0	-7.84549	1
MSTRG.20649	MSTRG.20649.1	5	+	13930907	13931149	243	1	Novel_lncRNA	Intergenic LncRNAs	0.22	0.31	0.494765	1
MSTRG.20652	MSTRG.20652.1	5	+	13954887	13955995	1064	2	Novel_lncRNA	Antisense LncRNAs	2.81	2.17	-0.372875	0.162516
MSTRG.20678	MSTRG.20678.1	5	-	14424329	14424664	336	1	Novel_lncRNA	Intergenic LncRNAs	1.94	0	-10.9218	0.000219491	yes
MSTRG.20686	MSTRG.20686.1	5	-	14523550	14527384	2701	4	Novel_lncRNA	Antisense LncRNAs	3.25	1.02	-1.67187	5.04284e-18	yes
MSTRG.20695	MSTRG.20695.1	5	-	14656323	14657371	1049	1	Novel_lncRNA	Intergenic LncRNAs	3.81	1.15	-1.72816	7.3967e-09	yes
MSTRG.20712	MSTRG.20712.1	5	+	14909923	14910261	309	2	Novel_lncRNA	Intergenic LncRNAs	4.57	0.49	-3.22134	6.30093e-07	yes
MSTRG.20713	MSTRG.20713.1	5	+	14920837	14921205	369	1	Novel_lncRNA	Intergenic LncRNAs	0	0.1	6.64386	1
MSTRG.20714	MSTRG.20714.1	5	-	14943769	14945093	1232	2	Novel_lncRNA	Sense LncRNAs	0.09	2.03	4.49541	3.74784e-12	yes
MSTRG.20726	MSTRG.20726.1	5	-	15087708	15088021	314	1	Novel_lncRNA	Intergenic LncRNAs	1.94	0.24	-3.01495	0.00291731	yes
MSTRG.20728	MSTRG.20728.1	5	-	15111472	15111752	281	1	Novel_lncRNA	Intergenic LncRNAs	7.62	0.13	-5.87321	2.47938e-13	yes
MSTRG.20729	MSTRG.20729.1	5	+	15111528	15111745	218	1	Novel_lncRNA	Intergenic LncRNAs	0	0.33	8.36632	0.537283
MSTRG.20731	MSTRG.20731.1	5	-	15114211	15114503	293	1	Novel_lncRNA	Antisense LncRNAs	8.42	0	-13.0396	4.34492e-15	yes
MSTRG.20732	MSTRG.20732.1	5	-	15115288	15115747	460	1	Novel_lncRNA	Others(anti down)	0.83	0	-9.69697	0.0111518	yes
MSTRG.20733	MSTRG.20733.1	5	+	15115435	15115753	319	1	Novel_lncRNA	Others(sense updown)	2.55	0.24	-3.40939	0.00025944	yes
MSTRG.20744	MSTRG.20744.1	5	+	15229621	15230081	461	1	Novel_lncRNA	Intergenic LncRNAs	1.88	0.08	-4.55459	1.6231e-05	yes
MSTRG.20745	MSTRG.20745.1	5	+	15242010	15242423	414	1	Novel_lncRNA	Intergenic LncRNAs	2.76	0.09	-4.9386	3.15374e-07	yes
MSTRG.20746	MSTRG.20746.1	5	-	15242060	15242437	378	1	Novel_lncRNA	Intergenic LncRNAs	3.2	1.63	-0.9732	0.0500667
MSTRG.20757	MSTRG.20757.1	5	-	15376444	15377566	435	3	Novel_lncRNA	Sense LncRNAs	13.6	4.26	-1.67468	1.33028e-12	yes
MSTRG.20763	MSTRG.20763.1	5	+	15422930	15423252	323	1	Novel_lncRNA	Others(sense updown)	0.17	1.99	3.54916	0.0061894	yes
MSTRG.20766	MSTRG.20766.1	5	-	15442230	15443632	1403	1	Novel_lncRNA	Others(anti down)	1.97	6.87	1.80211	3.30969e-17	yes
MSTRG.20779	MSTRG.20779.1	5	-	15513966	15515204	1239	1	Novel_lncRNA	Others(sense updown)	1.27	0.37	-1.77923	0.000306849	yes
MSTRG.20780	MSTRG.20780.1	5	-	15515582	15524206	7150	6	Novel_lncRNA	Antisense LncRNAs	4.52	0.75	-2.59136	7.81689e-108	yes
MSTRG.20783	MSTRG.20783.1	5	-	15545202	15545526	325	1	Novel_lncRNA	Intergenic LncRNAs	2	0	-10.9658	0.000219491	yes
MSTRG.20803	MSTRG.20803.1	5	-	15672475	15673427	772	2	Novel_lncRNA	Antisense LncRNAs	16.26	0.83	-4.29207	1.23802e-68	yes
MSTRG.20805	MSTRG.20805.1	5	+	15679446	15681742	283	2	Novel_lncRNA	Intronic LncRNAs	5.24	0.67	-2.96733	1.06212e-06	yes
MSTRG.20808	MSTRG.20808.1	5	-	15711129	15711464	336	1	Novel_lncRNA	Intergenic LncRNAs	5.98	0	-12.5459	3.66857e-12	yes
MSTRG.20809	MSTRG.20809.1	5	+	15712456	15712758	303	1	Novel_lncRNA	Intergenic LncRNAs	0	0.18	7.49185	1
MSTRG.20811	MSTRG.20811.1	5	-	15735300	15736574	781	3	Novel_lncRNA	Intergenic LncRNAs	0.63	3.92	2.63743	3.75968e-09	yes
MSTRG.20825	MSTRG.20825.1	5	+	15943627	15943995	369	1	Novel_lncRNA	Antisense LncRNAs	2.06	0	-11.0084	6.00341e-05	yes
MSTRG.20829	MSTRG.20829.1	5	+	16067179	16067429	251	1	Novel_lncRNA	Intergenic LncRNAs	0.22	0	-7.78136	1
MSTRG.20830	MSTRG.20830.1	5	-	16067761	16068068	308	1	Novel_lncRNA	Intergenic LncRNAs	4.2	0	-12.0362	8.36921e-08	yes
MSTRG.20855	MSTRG.20855.1	5	+	16234657	16235369	713	1	Novel_lncRNA	Intergenic LncRNAs	1.07	0.37	-1.53201	0.0359243	yes
MSTRG.20863	MSTRG.20863.1	5	+	16356092	16356340	249	1	Novel_lncRNA	Intergenic LncRNAs	0.48	0	-8.90689	0.284393
MSTRG.20864	MSTRG.20864.1	5	-	16356095	16356347	253	1	Novel_lncRNA	Intergenic LncRNAs	0.21	0	-7.71425	1
MSTRG.20868	MSTRG.20868.1	5	-	16405611	16405957	347	1	Novel_lncRNA	Intergenic LncRNAs	4.23	0.58	-2.86653	1.88079e-06	yes
MSTRG.20869	MSTRG.20869.1	5	+	16405727	16405965	239	1	Novel_lncRNA	Intergenic LncRNAs	2.5	0	-11.2877	0.000418506	yes
MSTRG.20876	MSTRG.20876.1	5	+	16470989	16471494	506	1	Novel_lncRNA	Intergenic LncRNAs	2.15	0.07	-4.94084	6.10507e-07	yes
MSTRG.20895	MSTRG.20895.1	5	-	16710512	16710735	224	1	Novel_lncRNA	Bidirectional LncRNAs	0.48	0.17	-1.4975	1
MSTRG.20900	MSTRG.20900.1	5	+	16758426	16758796	371	1	Novel_lncRNA	Intergenic LncRNAs	0.59	0.2	-1.56071	0.25698
MSTRG.20917	MSTRG.20917.1	5	-	16894483	16894696	214	1	Novel_lncRNA	Intergenic LncRNAs	1.01	0	-9.98014	0.07712
MSTRG.20918	MSTRG.20918.1	5	+	16897593	16897854	262	1	Novel_lncRNA	Antisense LncRNAs	2.9	0	-11.5018	6.00341e-05	yes
MSTRG.20930	MSTRG.20930.1	5	-	17008376	17009924	498	2	Novel_lncRNA	Antisense LncRNAs	2.4	0.23	-3.38333	1.25027e-05	yes
MSTRG.20931	MSTRG.20931.1	5	-	17010025	17011027	869	2	Novel_lncRNA	Antisense LncRNAs	21.07	6.98	-1.59389	7.00289e-34	yes
MSTRG.20939	MSTRG.20939.1	5	+	17068452	17069199	658	2	Novel_lncRNA	Intergenic LncRNAs	2.8	0.29	-3.2713	1.69305e-08	yes
MSTRG.20946	MSTRG.20946.1	5	+	17147912	17148166	255	1	Novel_lncRNA	Others(sense updown)	0.64	0	-9.32193	0.284393
MSTRG.20951	MSTRG.20951.1	5	-	17189646	17190104	459	1	Novel_lncRNA	Antisense LncRNAs	4.59	0.33	-3.79796	5.99815e-11	yes
MSTRG.20954	MSTRG.20954.1	5	+	17224138	17224369	232	1	Novel_lncRNA	Intergenic LncRNAs	0.47	0	-8.87652	0.537283
MSTRG.20972	MSTRG.20972.1	5	-	17442381	17443119	739	1	Novel_lncRNA	Others(sense updown)	0.95	3.79	1.9962	2.04704e-06	yes
MSTRG.20977	MSTRG.20977.1	5	-	17467433	17468156	724	1	Novel_lncRNA	Others(sense updown)	0.3	0.99	1.72247	0.0359243	yes
MSTRG.20978	MSTRG.20978.1	5	-	17468776	17469015	240	1	Novel_lncRNA	Intergenic LncRNAs	0.45	0	-8.81378	0.537283
MSTRG.20993	MSTRG.20993.1	5	-	17616094	17616366	273	1	Novel_lncRNA	Bidirectional LncRNAs	0.6	0	-9.22882	0.284393
MSTRG.20994	MSTRG.20994.1	5	+	17616103	17616366	264	1	Novel_lncRNA	Others(sense updown)	0.41	0	-8.67948	0.537283
MSTRG.21013	MSTRG.21013.1	5	+	17908433	17908694	262	1	Novel_lncRNA	Bidirectional LncRNAs	1.45	0	-10.5018	0.0111518	yes
MSTRG.21045	MSTRG.21045.3	5	+	18258674	18259934	1261	1	Novel_lncRNA	Sense LncRNAs	2.15	2.01	-0.0971412	0.617762
MSTRG.21050	MSTRG.21050.1	5	-	18292789	18293044	256	1	Novel_lncRNA	Antisense LncRNAs	0.21	0	-7.71425	1
MSTRG.21052	MSTRG.21052.2	5	-	18300830	18303492	2475	2	Novel_lncRNA	Others(sense updown)	1.53	0.06	-4.67243	4.8385e-22	yes
MSTRG.21052	MSTRG.21052.1	5	-	18300830	18303492	1420	3	Novel_lncRNA	Others(sense updown)	3.07	0	-11.584	1.40942e-26	yes
MSTRG.21074	MSTRG.21074.1	5	-	18483935	18488832	574	2	Novel_lncRNA	Intergenic LncRNAs	1.23	0	-10.2644	0.000115018	yes
MSTRG.21084	MSTRG.21084.1	5	+	18529135	18529406	272	1	Novel_lncRNA	Bidirectional LncRNAs	15.58	0.56	-4.79812	6.08212e-25	yes
MSTRG.21085	MSTRG.21085.1	5	-	18534466	18534733	268	1	Novel_lncRNA	Intergenic LncRNAs	0.81	0	-9.66178	0.07712
MSTRG.21088	MSTRG.21088.3	5	-	18577765	18579775	1534	2	Novel_lncRNA	Sense LncRNAs	7.02	0.29	-4.59735	6.01088e-62	yes
MSTRG.21097	MSTRG.21097.1	5	+	18634745	18635006	262	1	Novel_lncRNA	Intergenic LncRNAs	5.59	0	-12.4486	5.76571e-09	yes
MSTRG.21098	MSTRG.21098.1	5	-	18634750	18635084	335	1	Novel_lncRNA	Intergenic LncRNAs	5.35	0.23	-4.53983	4.98345e-10	yes
MSTRG.21105	MSTRG.21105.2	5	-	18690419	18694251	3066	3	Novel_lncRNA	Antisense LncRNAs	53.02	5.51	-3.26641	0	yes
MSTRG.21105	MSTRG.21105.3	5	-	18695972	18696701	648	2	Novel_lncRNA	Antisense LncRNAs	211.46	19.13	-3.46648	0	yes
MSTRG.21117	MSTRG.21117.1	5	+	18747462	18747771	310	1	Novel_lncRNA	Intergenic LncRNAs	12.08	3.41	-1.82478	2.39827e-09	yes
MSTRG.21124	MSTRG.21124.1	5	+	18805160	18805620	461	1	Novel_lncRNA	Others(anti down)	6.83	0.25	-4.77189	2.72941e-18	yes
MSTRG.21134	MSTRG.21134.1	5	+	18961144	18961379	236	1	Novel_lncRNA	Antisense LncRNAs	3.67	0	-11.8416	1.6231e-05	yes
MSTRG.21146	MSTRG.21146.1	5	+	19039832	19040064	233	1	Novel_lncRNA	Intergenic LncRNAs	0.98	0	-9.93664	0.07712
MSTRG.21168	MSTRG.21168.1	5	+	19323113	19323569	457	1	Novel_lncRNA	Intergenic LncRNAs	3.95	0.17	-4.53825	4.98345e-10	yes
MSTRG.21169	MSTRG.21169.1	5	-	19323240	19323539	300	1	Novel_lncRNA	Intergenic LncRNAs	6.15	0.13	-5.564	1.39673e-11	yes
MSTRG.21204	MSTRG.21204.1	5	+	19654943	19655343	401	1	Novel_lncRNA	Intergenic LncRNAs	0.68	1.7	1.32193	0.159635
MSTRG.21223	MSTRG.21223.1	5	+	19778371	19778634	264	1	Novel_lncRNA	Intergenic LncRNAs	8.02	0.86	-3.22119	2.69459e-09	yes
MSTRG.21224	MSTRG.21224.1	5	-	19778924	19779143	220	1	Novel_lncRNA	Intergenic LncRNAs	19.24	1.55	-3.63377	2.13312e-20	yes
MSTRG.21225	MSTRG.21225.1	5	+	19778930	19779142	213	1	Novel_lncRNA	Intergenic LncRNAs	1.53	0	-10.5793	0.0214131	yes
MSTRG.21226	MSTRG.21226.1	5	+	19780124	19780572	449	1	Novel_lncRNA	Intergenic LncRNAs	0.73	0	-9.51175	0.0214131	yes
MSTRG.21227	MSTRG.21227.1	5	-	19780149	19780567	419	1	Novel_lncRNA	Intergenic LncRNAs	0.26	0	-8.02237	0.537283
MSTRG.21233	MSTRG.21233.1	5	+	19801177	19801680	504	1	Novel_lncRNA	Intergenic LncRNAs	3.23	0	-11.6573	7.792e-10	yes
MSTRG.21241	MSTRG.21241.1	5	-	19868933	19869766	834	1	Novel_lncRNA	Bidirectional LncRNAs	3.97	1.68	-1.24068	2.75578e-05	yes
MSTRG.21253	MSTRG.21253.1	5	+	20008278	20008621	344	1	Novel_lncRNA	Intergenic LncRNAs	4.86	0.11	-5.46538	2.04946e-10	yes
MSTRG.21254	MSTRG.21254.1	5	-	20013139	20013481	343	1	Novel_lncRNA	Intergenic LncRNAs	2.25	0.22	-3.35435	0.000469508	yes
MSTRG.21255	MSTRG.21255.1	5	+	20013179	20013470	292	1	Novel_lncRNA	Intergenic LncRNAs	0.93	0	-9.86109	0.0406196	yes
MSTRG.21271	MSTRG.21271.2	5	+	20189041	20190112	867	3	Novel_lncRNA	Sense LncRNAs	11.39	0.7	-4.02427	1.40378e-51	yes
MSTRG.21272	MSTRG.21272.1	5	+	20194039	20194317	279	1	Novel_lncRNA	Others(sense updown)	9.14	1.9	-2.26619	3.53296e-08	yes
MSTRG.21292	MSTRG.21292.1	5	+	20392543	20394919	2377	1	Novel_lncRNA	Intergenic LncRNAs	2.28	0.29	-2.97491	2.35015e-22	yes
MSTRG.21312	MSTRG.21312.1	5	+	20598036	20598333	298	1	Novel_lncRNA	Intergenic LncRNAs	10.02	0.63	-3.99139	6.14107e-16	yes
MSTRG.21313	MSTRG.21313.1	5	-	20598038	20598333	296	1	Novel_lncRNA	Intergenic LncRNAs	30.98	1.53	-4.33973	5.0135e-51	yes
MSTRG.21315	MSTRG.21315.1	5	-	20621188	20621387	200	1	Novel_lncRNA	Intronic LncRNAs	8.68	1.13	-2.94137	2.80795e-07	yes
MSTRG.21349	MSTRG.21349.1	5	-	20918695	20919114	420	1	Novel_lncRNA	Antisense LncRNAs	4.4	0	-12.1033	2.73364e-11	yes
MSTRG.21356	MSTRG.21356.1	5	+	20992574	20992825	252	1	Novel_lncRNA	Intergenic LncRNAs	1.94	0	-10.9218	0.00302028	yes
MSTRG.21369	MSTRG.21369.1	5	+	21062342	21063025	593	2	Novel_lncRNA	Others(sense updown)	1.37	0	-10.42	3.11919e-05	yes
MSTRG.21403	MSTRG.21403.4	5	-	21305903	21311435	5429	3	Novel_lncRNA	Sense LncRNAs	477.3	32.14	-3.89245	0	yes
MSTRG.21463	MSTRG.21463.1	5	+	22097667	22105346	634	3	Novel_lncRNA	Others(lnc(mRNA))	0.17	6.22	5.19331	3.99352e-20	yes
MSTRG.21465	MSTRG.21465.2	5	-	22102961	22103717	236	2	Novel_lncRNA	Sense LncRNAs	1.2	0.16	-2.90689	0.14915
MSTRG.21465	MSTRG.21465.1	5	-	22102961	22104141	517	4	Novel_lncRNA	Sense LncRNAs	10.58	0.8	-3.7252	1.56707e-27	yes
MSTRG.21495	MSTRG.21495.2	5	+	22326449	22328323	689	2	Novel_lncRNA	Sense LncRNAs	13.55	2.58	-2.39285	1.0824e-29	yes
MSTRG.21521	MSTRG.21521.1	5	+	22596961	22597337	377	1	Novel_lncRNA	Intergenic LncRNAs	1.21	0.2	-2.59694	0.016613	yes
MSTRG.21528	MSTRG.21528.1	5	+	22659104	22660026	817	2	Novel_lncRNA	Bidirectional LncRNAs	1.15	0.14	-3.03814	0.000219491	yes
MSTRG.21536	MSTRG.21536.1	5	+	22731725	22732005	281	1	Novel_lncRNA	Intergenic LncRNAs	1.17	0	-10.1923	0.0214131	yes
MSTRG.21544	MSTRG.21544.1	5	-	22823347	22824001	655	1	Novel_lncRNA	Others(anti down)	2.94	0.46	-2.67611	1.24975e-07	yes
MSTRG.21570	MSTRG.21570.2	5	-	23036346	23037905	564	3	Novel_lncRNA	Sense LncRNAs	3.23	0.24	-3.75043	2.55235e-09	yes
MSTRG.21592	MSTRG.21592.3	5	+	23198290	23198775	486	1	Novel_lncRNA	Sense LncRNAs	6.84	0.31	-4.46366	1.91792e-19	yes
MSTRG.21603	MSTRG.21603.1	5	-	23278680	23279271	418	2	Novel_lncRNA	Intergenic LncRNAs	2.99	0.18	-4.05408	5.67595e-07	yes
MSTRG.21612	MSTRG.21612.1	5	-	23326889	23327134	246	1	Novel_lncRNA	Others(sense updown),Others(anti down)	3.97	0.15	-4.7261	2.23847e-06	yes
MSTRG.21613	MSTRG.21613.1	5	+	23326924	23327125	202	1	Novel_lncRNA	Bidirectional LncRNAs	1.65	0	-10.6883	0.0214131	yes
MSTRG.21674	MSTRG.21674.2	5	-	23864980	23865716	655	2	Novel_lncRNA	Sense LncRNAs	0.31	0	-8.27612	0.14915
MSTRG.21674	MSTRG.21674.1	5	-	23864980	23865797	538	2	Novel_lncRNA	Sense LncRNAs	2.44	0.21	-3.53842	2.10804e-06	yes
MSTRG.21675	MSTRG.21675.1	5	-	23865866	23866106	241	1	Novel_lncRNA	Others(sense updown)	0.9	0	-9.81378	0.07712
MSTRG.21728	MSTRG.21728.1	5	+	24300674	24301029	356	1	Novel_lncRNA	Intergenic LncRNAs	4.2	0.11	-5.25481	1.51832e-09	yes
MSTRG.21792	MSTRG.21792.1	5	+	24769398	24769632	235	1	Novel_lncRNA	Intergenic LncRNAs	0.23	0	-7.84549	1
MSTRG.21851	MSTRG.21851.1	5	-	25292026	25292599	574	1	Novel_lncRNA	Antisense LncRNAs	0.95	1.84	0.953706	0.158337
MSTRG.21860	MSTRG.21860.3	5	+	25364455	25367229	2751	2	Novel_lncRNA	Sense LncRNAs	4.73	0.57	-3.05281	1.23692e-52	yes
MSTRG.21862	MSTRG.21862.1	5	-	25381260	25381643	384	1	Novel_lncRNA	Antisense LncRNAs	36.17	2.93	-3.62582	1.35978e-66	yes
MSTRG.21895	MSTRG.21895.1	5	-	25603129	25605177	1222	3	Novel_lncRNA	Sense LncRNAs	1.78	0.71	-1.32599	0.000728462	yes
MSTRG.21903	MSTRG.21903.1	5	-	25655585	25655874	290	1	Novel_lncRNA	Antisense LncRNAs	4.12	0	-12.0084	3.15374e-07	yes
MSTRG.21917	MSTRG.21917.1	5	+	25758479	25759124	646	1	Novel_lncRNA	Others(anti down)	50.32	63.73	0.340841	0.000666253
MSTRG.21924	MSTRG.21924.1	5	+	25842528	25842840	234	2	Novel_lncRNA	Intergenic LncRNAs	0.93	0.16	-2.53916	0.25698
MSTRG.21925	MSTRG.21925.1	5	-	25845931	25847594	981	3	Novel_lncRNA	Sense LncRNAs	4.48	0	-12.1293	7.14121e-27	yes
MSTRG.21957	MSTRG.21957.1	5	+	26073686	26074066	381	1	Novel_lncRNA	Intergenic LncRNAs	1.14	0.2	-2.51096	0.0290932	yes
MSTRG.21988	MSTRG.21988.1	5	-	26349991	26350230	240	1	Novel_lncRNA	Intergenic LncRNAs	3.84	0.63	-2.60768	0.00082166	yes
MSTRG.22001	MSTRG.22001.1	5	-	26502847	26505107	251	2	Novel_lncRNA	Intergenic LncRNAs	3.32	0	-11.697	1.6231e-05	yes
MSTRG.22002	MSTRG.22002.1	5	-	26509553	26569839	452	4	Novel_lncRNA	Intergenic LncRNAs	12.76	0.65	-4.29504	1.78234e-31	yes
MSTRG.22003	MSTRG.22003.1	5	-	26511547	26578960	393	3	Novel_lncRNA	Intergenic LncRNAs	11.79	1.21	-3.28448	4.7095e-21	yes
MSTRG.22004	MSTRG.22004.1	5	+	26526504	26531296	223	2	Novel_lncRNA	Intergenic LncRNAs	3.16	0	-11.6257	0.000115018	yes
MSTRG.22003	MSTRG.22003.2	5	-	26527513	26561194	894	5	Novel_lncRNA	Intergenic LncRNAs	41.47	0.49	-6.40314	4.5745e-226	yes
MSTRG.22003	MSTRG.22003.3	5	-	26535895	26578960	493	3	Novel_lncRNA	Intergenic LncRNAs	31.11	1.39	-4.48422	2.07307e-85	yes
MSTRG.22003	MSTRG.22003.4	5	-	26539844	26545582	871	3	Novel_lncRNA	Intergenic LncRNAs	2.97	0	-11.5362	5.75172e-16	yes
MSTRG.22003	MSTRG.22003.5	5	-	26540738	26578960	525	3	Novel_lncRNA	Intergenic LncRNAs	5.11	0.1	-5.67525	7.48793e-17	yes
MSTRG.22003	MSTRG.22003.6	5	-	26554559	26557429	266	2	Novel_lncRNA	Intergenic LncRNAs	0.53	0.14	-1.92057	0.66687
MSTRG.22005	MSTRG.22005.1	5	+	26578180	26605506	288	2	Novel_lncRNA	Others(sense updown)	1.32	0	-10.3663	0.0111518	yes
MSTRG.22008	MSTRG.22008.1	6	+	9518	66963	378	2	Novel_lncRNA	Intergenic LncRNAs	18.43	0.5	-5.20398	1.03019e-43	yes
MSTRG.22008	MSTRG.22008.2	6	+	19176	66963	539	3	Novel_lncRNA	Intergenic LncRNAs	21.01	0.35	-5.90758	3.07673e-70	yes
MSTRG.22009	MSTRG.22009.1	6	-	80171	103855	211	2	Novel_lncRNA	Intergenic LncRNAs	2.83	0.18	-3.97473	0.000418506	yes
MSTRG.22010	MSTRG.22010.1	6	+	80172	103955	310	2	Novel_lncRNA	Intergenic LncRNAs	6.52	0	-12.6707	1.87722e-12	yes
MSTRG.22011	MSTRG.22011.1	6	+	82945	83181	237	1	Novel_lncRNA	Intergenic LncRNAs	1.01	0	-9.98014	0.07712
MSTRG.22012	MSTRG.22012.1	6	+	154247	154490	244	1	Novel_lncRNA	Intergenic LncRNAs	3.99	0.62	-2.68605	0.000474369	yes
MSTRG.22020	MSTRG.22020.1	6	+	197726	198143	418	1	Novel_lncRNA	Intergenic LncRNAs	5.31	2.32	-1.19459	0.00153641	yes
MSTRG.22058	MSTRG.22058.1	6	+	491267	491741	475	1	Novel_lncRNA	Intergenic LncRNAs	1.71	0.24	-2.83289	0.00121172	yes
MSTRG.22068	MSTRG.22068.1	6	-	589114	589327	214	1	Novel_lncRNA	Intergenic LncRNAs	0.31	0	-8.27612	1
MSTRG.22086	MSTRG.22086.1	6	-	782117	791665	6312	7	Novel_lncRNA	Sense LncRNAs	4.14	0.14	-4.88613	4.31391e-154	yes
MSTRG.22093	MSTRG.22093.1	6	-	830142	830411	270	1	Novel_lncRNA	Intergenic LncRNAs	2.41	0	-11.2348	0.000219491	yes
MSTRG.22115	MSTRG.22115.1	6	+	922965	923214	250	1	Novel_lncRNA	Intronic LncRNAs	0.22	0	-7.78136	1
MSTRG.22124	MSTRG.22124.1	6	+	1010784	1011173	232	2	Novel_lncRNA	Intergenic LncRNAs	2.57	0	-11.3276	0.000418506	yes
MSTRG.22142	MSTRG.22142.1	6	+	1208744	1209290	547	1	Novel_lncRNA	Intergenic LncRNAs	0	2.63	11.3608	2.3319e-08	yes
MSTRG.22250	MSTRG.22250.2	6	-	1992001	1995656	2014	2	Novel_lncRNA	Antisense LncRNAs	0.81	0.42	-0.947533	0.018036
MSTRG.22289	MSTRG.22289.1	6	-	2257519	2257869	351	1	Novel_lncRNA	Intergenic LncRNAs	3.38	0	-11.7228	3.15374e-07	yes
MSTRG.22294	MSTRG.22294.4	6	+	2290837	2292821	1985	1	Novel_lncRNA	Sense LncRNAs	2.28	0.07	-5.02554	2.37611e-28	yes
MSTRG.22301	MSTRG.22301.1	6	-	2320784	2322838	719	2	Novel_lncRNA	Sense LncRNAs	12.91	10.25	-0.332865	0.0153645
MSTRG.22314	MSTRG.22314.1	6	-	2407548	2407805	258	1	Novel_lncRNA	Antisense LncRNAs	2.29	0	-11.1611	0.000418506	yes
MSTRG.22315	MSTRG.22315.1	6	-	2410059	2410445	309	2	Novel_lncRNA	Intergenic LncRNAs	1.41	0.78	-0.854149	0.341714
MSTRG.22330	MSTRG.22330.1	6	+	2483195	2484280	1086	1	Novel_lncRNA	Intronic LncRNAs	6.65	0.56	-3.56986	5.43473e-35	yes
MSTRG.22337	MSTRG.22337.1	6	+	2520016	2520246	231	1	Novel_lncRNA	Antisense LncRNAs	0.21	0	-7.71425	1
MSTRG.22393	MSTRG.22393.7	6	+	3001256	3017259	3232	3	Novel_lncRNA	Antisense LncRNAs	2.33	0.29	-3.00621	3.43687e-30	yes
MSTRG.22400	MSTRG.22400.1	6	+	3049108	3049337	230	1	Novel_lncRNA	Intergenic LncRNAs	0.71	0	-9.47168	0.284393
MSTRG.22424	MSTRG.22424.1	6	-	3189779	3190079	301	1	Novel_lncRNA	Intergenic LncRNAs	3.43	0.25	-3.77821	1.25726e-05	yes
MSTRG.22431	MSTRG.22431.1	6	-	3237190	3237394	205	1	Novel_lncRNA	Intergenic LncRNAs	0.26	0	-8.02237	1
MSTRG.22434	MSTRG.22434.1	6	-	3243753	3244140	388	1	Novel_lncRNA	Antisense LncRNAs	1.96	0.19	-3.36678	0.000469508	yes
MSTRG.22454	MSTRG.22454.1	6	-	3346999	3347436	438	1	Novel_lncRNA	Intergenic LncRNAs	3.1	0	-11.5981	2.19753e-08	yes
MSTRG.22479	MSTRG.22479.2	6	-	3556928	3557320	263	2	Novel_lncRNA	Sense LncRNAs	1.24	0	-10.2761	0.0214131	yes
MSTRG.22483	MSTRG.22483.1	6	-	3594201	3595583	1014	4	Novel_lncRNA	Sense LncRNAs	4.95	2.75	-0.847997	0.000146589
MSTRG.22484	MSTRG.22484.1	6	-	3603917	3604184	268	1	Novel_lncRNA	Others(sense updown)	219.31	643.28	1.55248	2.31158e-208	yes
MSTRG.22485	MSTRG.22485.1	6	+	3603917	3604205	289	1	Novel_lncRNA	Bidirectional LncRNAs	6.95	4.97	-0.483767	0.128739
MSTRG.22508	MSTRG.22508.1	6	+	3768192	3770080	357	2	Novel_lncRNA	Intergenic LncRNAs	5.17	1.27	-2.02534	1.99519e-05	yes
MSTRG.22545	MSTRG.22545.1	6	+	4126682	4126942	261	1	Novel_lncRNA	Intergenic LncRNAs	0.21	0	-7.71425	1
MSTRG.22584	MSTRG.22584.2	6	-	4609206	4610688	1483	1	Novel_lncRNA	Sense LncRNAs	0	2.55	11.3163	3.60892e-22	yes
MSTRG.22586	MSTRG.22586.1	6	+	4681121	4688036	374	2	Novel_lncRNA	Others(lnc(mRNA))	0.73	3.13	2.10019	0.00212832	yes
MSTRG.22612	MSTRG.22612.1	6	+	5030858	5031205	348	1	Novel_lncRNA	Intergenic LncRNAs	13.26	0.43	-4.9466	2.90953e-27	yes
MSTRG.22618	MSTRG.22618.1	6	-	5075413	5075633	221	1	Novel_lncRNA	Others(anti down),Others(sense updown)	56.97	1.03	-5.78949	3.51652e-78	yes
MSTRG.22626	MSTRG.22626.1	6	+	5165794	5166227	434	1	Novel_lncRNA	Intergenic LncRNAs	5.25	0.17	-4.94871	3.27731e-14	yes
MSTRG.22627	MSTRG.22627.1	6	-	5166298	5166512	215	1	Novel_lncRNA	Intergenic LncRNAs	0.25	0	-7.96578	1
MSTRG.22634	MSTRG.22634.1	6	-	5243286	5243567	282	1	Novel_lncRNA	Intergenic LncRNAs	1.54	0	-10.5887	0.00579257	yes
MSTRG.22641	MSTRG.22641.1	6	+	5307052	5307332	281	1	Novel_lncRNA	Intergenic LncRNAs	2.32	0	-11.1799	0.000219491	yes
MSTRG.22677	MSTRG.22677.1	6	-	5714369	5714620	252	1	Novel_lncRNA	Intergenic LncRNAs	3.39	0	-11.7271	1.6231e-05	yes
MSTRG.22683	MSTRG.22683.1	6	+	5819691	5819977	287	1	Novel_lncRNA	Intergenic LncRNAs	3.03	0.13	-4.54273	1.6231e-05	yes
MSTRG.22684	MSTRG.22684.1	6	-	5819758	5819972	215	1	Novel_lncRNA	Intergenic LncRNAs	2.92	0	-11.5118	0.000418506	yes
MSTRG.22686	MSTRG.22686.1	6	-	5832477	5832753	277	1	Novel_lncRNA	Intergenic LncRNAs	0.59	0	-9.20457	0.284393
MSTRG.22687	MSTRG.22687.1	6	+	5832511	5833155	342	2	Novel_lncRNA	Others(anti down)	2.76	0	-11.4305	4.31054e-06	yes
MSTRG.22688	MSTRG.22688.1	6	+	5833423	5833714	292	1	Novel_lncRNA	Others(anti down)	1.86	0	-10.8611	0.00157708	yes
MSTRG.22690	MSTRG.22690.1	6	-	5854346	5854769	424	1	Novel_lncRNA	Intergenic LncRNAs	5.86	0.28	-4.3874	2.89079e-14	yes
MSTRG.22691	MSTRG.22691.1	6	+	5854351	5854656	306	1	Novel_lncRNA	Intergenic LncRNAs	3.25	0	-11.6662	2.23847e-06	yes
MSTRG.22709	MSTRG.22709.1	6	+	6008666	6009072	407	1	Novel_lncRNA	Intergenic LncRNAs	3.93	0.37	-3.40893	5.57025e-08	yes
MSTRG.22710	MSTRG.22710.1	6	-	6008706	6009040	335	1	Novel_lncRNA	Intergenic LncRNAs	2.27	0.11	-4.36712	6.00341e-05	yes
MSTRG.22731	MSTRG.22731.1	6	+	6265561	6269273	3690	2	Novel_lncRNA	Sense LncRNAs	456.6	241.49	-0.918967	0
MSTRG.22731	MSTRG.22731.3	6	+	6265682	6267413	1699	2	Novel_lncRNA	Sense LncRNAs	0.41	0.18	-1.18763	0.0958121
MSTRG.22732	MSTRG.22732.1	6	-	6267161	6267394	234	1	Novel_lncRNA	Intergenic LncRNAs	0.23	0	-7.84549	1
MSTRG.22733	MSTRG.22733.1	6	-	6267892	6268112	221	1	Novel_lncRNA	Intergenic LncRNAs	0.25	0	-7.96578	1
MSTRG.22734	MSTRG.22734.1	6	-	6269014	6269272	259	1	Novel_lncRNA	Intronic LncRNAs	0	0.15	7.22882	1
MSTRG.22743	MSTRG.22743.2	6	-	6385031	6386005	853	2	Novel_lncRNA	Sense LncRNAs	3.1	0.15	-4.36923	4.03819e-15	yes
MSTRG.22766	MSTRG.22766.1	6	+	6598272	6598488	217	1	Novel_lncRNA	Intergenic LncRNAs	5.58	3.79	-0.558067	0.207007
MSTRG.22786	MSTRG.22786.1	6	-	6749401	6749749	264	2	Novel_lncRNA	Intergenic LncRNAs	0	5.44	12.4094	2.3319e-08	yes
MSTRG.22788	MSTRG.22788.2	6	+	6754726	6769943	443	5	Novel_lncRNA	Sense LncRNAs	6.37	0.43	-3.88888	4.26295e-15	yes
MSTRG.22789	MSTRG.22789.1	6	-	6763579	6763973	395	1	Novel_lncRNA	Intergenic LncRNAs	0	1.72	10.7482	0.000115018	yes
MSTRG.22793	MSTRG.22793.1	6	-	6919284	6919582	299	1	Novel_lncRNA	Antisense LncRNAs	0.73	0	-9.51175	0.07712
MSTRG.22821	MSTRG.22821.1	6	-	7329410	7329614	205	1	Novel_lncRNA	Intergenic LncRNAs	1.71	0	-10.7398	0.0214131	yes
MSTRG.22832	MSTRG.22832.1	6	-	7418740	7419043	304	1	Novel_lncRNA	Intergenic LncRNAs	30.88	0.12	-8.00749	2.79423e-57	yes
MSTRG.22839	MSTRG.22839.5	6	+	7511127	7511966	641	3	Novel_lncRNA	Sense LncRNAs	23.11	9.61	-1.26591	4.28256e-20	yes
MSTRG.22859	MSTRG.22859.1	6	-	7637341	7637559	219	1	Novel_lncRNA	Intergenic LncRNAs	0.25	0	-7.96578	1
MSTRG.22883	MSTRG.22883.1	6	+	7869924	7870456	533	1	Novel_lncRNA	Intergenic LncRNAs	5.24	0	-12.3554	3.79633e-17	yes
MSTRG.22885	MSTRG.22885.1	6	+	7899466	7899763	298	1	Novel_lncRNA	Intergenic LncRNAs	5.48	1.41	-1.95848	8.26057e-05	yes
MSTRG.22887	MSTRG.22887.1	6	-	7981579	7981820	242	1	Novel_lncRNA	Intergenic LncRNAs	3.36	0	-11.7142	3.11919e-05	yes
MSTRG.22888	MSTRG.22888.1	6	+	7981594	7981798	205	1	Novel_lncRNA	Intergenic LncRNAs	0.53	0	-9.04985	0.537283
MSTRG.22889	MSTRG.22889.1	6	-	7991387	7991834	448	1	Novel_lncRNA	Intergenic LncRNAs	0.12	2.19	4.18982	7.0502e-05	yes
MSTRG.22891	MSTRG.22891.1	6	-	8023519	8023942	424	1	Novel_lncRNA	Intergenic LncRNAs	4.63	0.09	-5.68494	1.87722e-12	yes
MSTRG.22894	MSTRG.22894.1	6	+	8097848	8098213	366	1	Novel_lncRNA	Intergenic LncRNAs	3.56	0.62	-2.52154	3.96399e-05	yes
MSTRG.22909	MSTRG.22909.1	6	-	8258931	8259182	252	1	Novel_lncRNA	Intergenic LncRNAs	3.53	0.13	-4.76308	8.46889e-06	yes
MSTRG.22910	MSTRG.22910.1	6	+	8258931	8259192	262	1	Novel_lncRNA	Intergenic LncRNAs	6.46	0.1	-6.01346	1.04848e-10	yes
MSTRG.22916	MSTRG.22916.1	6	-	8365187	8365750	564	1	Novel_lncRNA	Bidirectional LncRNAs	15.51	33.94	1.12979	2.33636e-16	yes
MSTRG.22917	MSTRG.22917.1	6	+	8365541	8365752	212	1	Novel_lncRNA	Others(sense updown)	13.31	3.21	-2.05187	4.21257e-08	yes
MSTRG.22919	MSTRG.22919.1	6	-	8366126	8368287	895	2	Novel_lncRNA	Antisense LncRNAs	12.31	2.7	-2.1888	2.39697e-31	yes
MSTRG.22946	MSTRG.22946.2	6	-	8792455	8793551	332	2	Novel_lncRNA	Sense LncRNAs	17.25	9.29	-0.892846	1.87621e-05
MSTRG.22948	MSTRG.22948.1	6	+	8846837	8847512	676	1	Novel_lncRNA	Sense LncRNAs	7.14	0.67	-3.41369	4.03926e-22	yes
MSTRG.22949	MSTRG.22949.1	6	+	8859707	8859927	221	1	Novel_lncRNA	Intergenic LncRNAs	1.23	0	-10.2644	0.0406196	yes
MSTRG.22954	MSTRG.22954.1	6	-	8940951	8942150	1200	1	Novel_lncRNA	Others(anti down),Others(sense updown)	0.9	0.63	-0.514573	0.304903
MSTRG.22958	MSTRG.22958.1	6	+	8981867	8982092	226	1	Novel_lncRNA	Bidirectional LncRNAs	0.72	0	-9.49185	0.284393
MSTRG.22959	MSTRG.22959.1	6	+	8986532	8986783	252	1	Novel_lncRNA	Intergenic LncRNAs	0.43	0.15	-1.51937	1
MSTRG.22963	MSTRG.22963.1	6	-	9118579	9118871	293	1	Novel_lncRNA	Intergenic LncRNAs	2.04	0	-10.9944	0.000418506	yes
MSTRG.22969	MSTRG.22969.1	6	-	9210324	9210529	206	1	Novel_lncRNA	Others(anti down)	0.26	0	-8.02237	1
MSTRG.22974	MSTRG.22974.6	6	+	9316251	9318991	2603	2	Novel_lncRNA	Sense LncRNAs	1.03	0.47	-1.13191	0.000658152	yes
MSTRG.22974	MSTRG.22974.7	6	+	9316262	9319051	2655	2	Novel_lncRNA	Sense LncRNAs	7.1	5.32	-0.416393	2.55982e-05
MSTRG.22974	MSTRG.22974.20	6	+	9418988	9420085	377	2	Novel_lncRNA	Sense LncRNAs	1.3	3.71	1.51291	0.00801544	yes
MSTRG.22980	MSTRG.22980.1	6	+	9441840	9443897	980	6	Novel_lncRNA	Intergenic LncRNAs	5.86	0.53	-3.46684	3.13717e-27	yes
MSTRG.22980	MSTRG.22980.2	6	+	9441940	9443897	725	6	Novel_lncRNA	Intergenic LncRNAs	0.31	0	-8.27612	0.07712
MSTRG.22998	MSTRG.22998.1	6	-	9749555	9749931	377	1	Novel_lncRNA	Intergenic LncRNAs	4.19	0	-12.0327	1.51832e-09	yes
MSTRG.23001	MSTRG.23001.1	6	-	9791274	9792042	769	1	Novel_lncRNA	Antisense LncRNAs	3.18	0.1	-4.99095	2.2179e-15	yes
MSTRG.23003	MSTRG.23003.1	6	-	9796797	9801966	4562	4	Novel_lncRNA	Antisense LncRNAs	18.36	0.6	-4.93546	0	yes
MSTRG.23004	MSTRG.23004.2	6	+	9802034	9807741	5708	1	Novel_lncRNA	Sense LncRNAs	1.5	0.36	-2.05889	3.88144e-23	yes
MSTRG.23010	MSTRG.23010.1	6	+	9838885	9839274	390	1	Novel_lncRNA	Intergenic LncRNAs	5.28	0.39	-3.75899	1.11696e-10	yes
MSTRG.23011	MSTRG.23011.1	6	-	9838981	9839340	360	1	Novel_lncRNA	Intergenic LncRNAs	1.75	0	-10.7731	0.000418506	yes
MSTRG.23017	MSTRG.23017.1	6	+	9926351	9926641	291	1	Novel_lncRNA	Others(sense updown),Others(sense updown)	1.31	0	-10.3554	0.0111518	yes
MSTRG.23037	MSTRG.23037.1	6	-	10266549	10266870	322	1	Novel_lncRNA	Intergenic LncRNAs	2.53	0	-11.3049	3.11919e-05	yes
MSTRG.23048	MSTRG.23048.1	6	+	10419885	10420127	243	1	Novel_lncRNA	Intergenic LncRNAs	1.34	0.47	-1.5115	0.21273
MSTRG.23058	MSTRG.23058.1	6	-	10590987	10594222	2017	2	Novel_lncRNA	Others(lnc(mRNA))	1.56	0.02	-6.2854	1.66346e-19	yes
MSTRG.23063	MSTRG.23063.1	6	+	10614445	10614833	389	1	Novel_lncRNA	Intergenic LncRNAs	1.54	0	-10.5887	0.000418506	yes
MSTRG.23064	MSTRG.23064.1	6	+	10615699	10616240	542	1	Novel_lncRNA	Others(sense updown)	2.95	0.21	-3.81225	6.49438e-09	yes
MSTRG.23067	MSTRG.23067.1	6	-	10632633	10632874	242	1	Novel_lncRNA	Bidirectional LncRNAs	0	0.31	8.27612	0.537283
MSTRG.23072	MSTRG.23072.1	6	+	10757285	10758029	745	1	Novel_lncRNA	Antisense LncRNAs	1.89	0.15	-3.65535	6.30093e-07	yes
MSTRG.23080	MSTRG.23080.1	6	+	10922656	10923103	340	2	Novel_lncRNA	Intergenic LncRNAs	5.3	0	-12.3718	5.38068e-11	yes
MSTRG.23082	MSTRG.23082.1	6	-	10949346	10949919	574	1	Novel_lncRNA	Intergenic LncRNAs	1.68	0	-10.7142	4.31054e-06	yes
MSTRG.23099	MSTRG.23099.1	6	-	11142351	11142813	463	1	Novel_lncRNA	Antisense LncRNAs	0.12	0	-6.90689	1
MSTRG.23113	MSTRG.23113.1	6	-	11242065	11242386	322	1	Novel_lncRNA	Bidirectional LncRNAs	3.71	0	-11.8572	3.15374e-07	yes
MSTRG.23118	MSTRG.23118.1	6	-	11251374	11252346	973	1	Novel_lncRNA	Antisense LncRNAs	9.65	0.39	-4.62898	1.43565e-53	yes
MSTRG.23122	MSTRG.23122.1	6	-	11257629	11258706	1078	1	Novel_lncRNA	Antisense LncRNAs	2.01	0.74	-1.4416	0.000219491	yes
MSTRG.23126	MSTRG.23126.1	6	-	11310758	11311133	247	2	Novel_lncRNA	Others(anti down)	1.32	0	-10.3663	0.0214131	yes
MSTRG.23127	MSTRG.23127.1	6	+	11320809	11321235	427	1	Novel_lncRNA	Intergenic LncRNAs	11.82	1.68	-2.8147	1.23885e-19	yes
MSTRG.23128	MSTRG.23128.1	6	+	11322109	11322792	684	1	Novel_lncRNA	Intergenic LncRNAs	13.65	0.66	-4.37029	6.95389e-52	yes
MSTRG.23129	MSTRG.23129.1	6	+	11323260	11323550	291	1	Novel_lncRNA	Others(sense updown)	2.42	0.26	-3.21842	0.000867787	yes
MSTRG.23130	MSTRG.23130.1	6	-	11324121	11325484	1364	1	Novel_lncRNA	Antisense LncRNAs	2.11	0.47	-2.16651	9.11963e-09	yes
MSTRG.23132	MSTRG.23132.1	6	+	11326431	11327106	586	2	Novel_lncRNA	Others(sense updown),Others(sense updown)	199.57	7.16	-4.80079	0	yes
MSTRG.23133	MSTRG.23133.1	6	-	11326434	11327196	673	2	Novel_lncRNA	Bidirectional LncRNAs	0.97	0	-9.92184	0.000219491	yes
MSTRG.23135	MSTRG.23135.1	6	-	11327856	11328733	878	1	Novel_lncRNA	Antisense LncRNAs	1.36	0.22	-2.62803	3.13169e-05	yes
MSTRG.23147	MSTRG.23147.1	6	+	11536184	11536662	479	1	Novel_lncRNA	Others(anti down),Others(sense updown)	1294.99	8339.33	2.68699	0	yes
MSTRG.23148	MSTRG.23148.1	6	-	11536184	11536675	492	1	Novel_lncRNA	Bidirectional LncRNAs	23.27	13.06	-0.833316	8.33258e-09
MSTRG.23163	MSTRG.23163.1	6	-	11797723	11798028	306	1	Novel_lncRNA	Antisense LncRNAs	0.89	0.12	-2.89077	0.14915
MSTRG.23168	MSTRG.23168.1	6	+	11889232	11889470	239	1	Novel_lncRNA	Antisense LncRNAs	1.14	0	-10.1548	0.0406196	yes
MSTRG.23169	MSTRG.23169.1	6	-	11919735	11921335	1601	1	Novel_lncRNA	Intergenic LncRNAs	1.79	0.33	-2.43942	1.57376e-09	yes
MSTRG.23170	MSTRG.23170.1	6	+	11927438	11928582	386	2	Novel_lncRNA	Bidirectional LncRNAs	0.42	1.08	1.36257	0.303267
MSTRG.23173	MSTRG.23173.1	6	-	11970892	11974459	1336	4	Novel_lncRNA	Sense LncRNAs	3.85	1.5	-1.3599	1.45903e-08	yes
MSTRG.23181	MSTRG.23181.2	6	-	12102962	12106819	2007	4	Novel_lncRNA	Sense LncRNAs	2.02	0.38	-2.41028	2.29297e-13	yes
MSTRG.23181	MSTRG.23181.1	6	-	12102962	12106819	2369	3	Novel_lncRNA	Sense LncRNAs	4.61	0.89	-2.37289	2.94829e-34	yes
MSTRG.23185	MSTRG.23185.2	6	+	12166906	12169051	663	2	Novel_lncRNA	Sense LncRNAs	1.07	0.85	-0.332076	0.612375
MSTRG.23186	MSTRG.23186.1	6	+	12169644	12170690	1047	1	Novel_lncRNA	Antisense LncRNAs	1.76	0.32	-2.45943	7.99102e-07	yes
MSTRG.23189	MSTRG.23189.1	6	+	12174217	12174450	234	1	Novel_lncRNA	Intergenic LncRNAs	0.7	0.16	-2.12928	0.421081
MSTRG.23191	MSTRG.23191.1	6	+	12182169	12182948	780	1	Novel_lncRNA	Antisense LncRNAs	0.28	1.79	2.67646	8.10983e-05	yes
MSTRG.23196	MSTRG.23196.3	6	+	12230155	12231083	824	2	Novel_lncRNA	Sense LncRNAs	2.32	0	-11.1799	1.39673e-11	yes
MSTRG.23197	MSTRG.23197.1	6	-	12258606	12259172	567	1	Novel_lncRNA	Intergenic LncRNAs	1.24	0	-10.2761	0.000115018	yes
MSTRG.23199	MSTRG.23199.1	6	-	12292692	12293019	328	1	Novel_lncRNA	Intergenic LncRNAs	4.24	0.46	-3.20436	6.30093e-07	yes
MSTRG.23219	MSTRG.23219.2	6	+	12580983	12581372	288	2	Novel_lncRNA	Intergenic LncRNAs	1.11	0	-10.1163	0.0214131	yes
MSTRG.23219	MSTRG.23219.1	6	+	12580983	12581904	745	2	Novel_lncRNA	Intergenic LncRNAs	3.14	0.05	-5.97269	8.55277e-15	yes
MSTRG.23230	MSTRG.23230.1	6	-	12744186	12745678	1296	3	Novel_lncRNA	Others(sense updown)	3.52	0.23	-3.93587	2.66499e-23	yes
MSTRG.23231	MSTRG.23231.1	6	-	12745899	12747466	1272	3	Novel_lncRNA	Sense LncRNAs	6.79	0.39	-4.12187	2.425e-46	yes
MSTRG.23231	MSTRG.23231.2	6	-	12745899	12747466	1122	4	Novel_lncRNA	Sense LncRNAs	7.4	0.68	-3.44392	2.01584e-38	yes
MSTRG.23232	MSTRG.23232.2	6	-	12749467	12752275	1666	6	Novel_lncRNA	Sense LncRNAs	3.65	0.48	-2.92679	1.77074e-24	yes
MSTRG.23234	MSTRG.23234.3	6	-	12755379	12757018	1319	3	Novel_lncRNA	Intergenic LncRNAs	2.03	0	-10.9873	1.47718e-16	yes
MSTRG.23234	MSTRG.23234.1	6	-	12755379	12757018	1421	2	Novel_lncRNA	Intergenic LncRNAs	5.51	0.06	-6.52095	1.96883e-48	yes
MSTRG.23234	MSTRG.23234.2	6	-	12755379	12757018	598	3	Novel_lncRNA	Intergenic LncRNAs	7.48	0.36	-4.37697	5.03316e-25	yes
MSTRG.23236	MSTRG.23236.1	6	-	12770012	12770225	214	1	Novel_lncRNA	Intergenic LncRNAs	0.19	0	-7.56986	1
MSTRG.23239	MSTRG.23239.1	6	-	12836834	12837407	574	1	Novel_lncRNA	Intergenic LncRNAs	0	6.92	12.7566	1.3525e-23	yes
MSTRG.23245	MSTRG.23245.1	6	-	13004203	13004779	577	1	Novel_lncRNA	Antisense LncRNAs	0.56	0	-9.12928	0.0214131	yes
MSTRG.23247	MSTRG.23247.1	6	+	13087090	13087445	356	1	Novel_lncRNA	Intergenic LncRNAs	3.05	0.11	-4.79323	6.10507e-07	yes
MSTRG.23254	MSTRG.23254.1	6	-	13224418	13225732	728	2	Novel_lncRNA	Intergenic LncRNAs	2.45	3.9	0.670692	0.0771854
MSTRG.23258	MSTRG.23258.1	6	+	13358035	13392643	774	3	Novel_lncRNA	Others(lnc(mRNA))	13.95	7.08	-0.978444	1.54272e-10
MSTRG.23269	MSTRG.23269.1	6	-	13597073	13597453	381	1	Novel_lncRNA	Intergenic LncRNAs	0.71	1.69	1.25113	0.224006
MSTRG.23270	MSTRG.23270.1	6	-	13603746	13604534	789	1	Novel_lncRNA	Intergenic LncRNAs	1.86	0.14	-3.7318	3.47123e-07	yes
MSTRG.23280	MSTRG.23280.1	6	+	13798910	13799214	305	1	Novel_lncRNA	Intergenic LncRNAs	4.27	0.37	-3.52864	2.10804e-06	yes
MSTRG.23282	MSTRG.23282.1	6	-	13880291	13880553	263	1	Novel_lncRNA	Intergenic LncRNAs	0.62	0.14	-2.14684	0.421081
[truncated: 2,074 more rows]

## Sheet: Table S2
Table S2. Genomic loci and expression pattern of lncRNAs identified from Oryza sativa spp. Japonica.
LncRNA_Gene_ID	LncRNA_ID	Chromosome	Strand	Start	End	Length	Exon_number	Status	Gene_Type	Panicle expression	Seedlings expression	log2(fold change)	FDR	Differentially expressed
MSTRG.19	MSTRG.19.1	1	-	144902	145140	239	1	Novel_lncRNA	Bidirectional LncRNAs	2.31	8.59	1.89477	0.0150294	yes
MSTRG.86	MSTRG.86.1	1	-	626095	627007	913	1	Novel_lncRNA	Antisense LncRNAs	0.6	0.03	-4.32193	7.68392e-07	yes
MSTRG.91	MSTRG.91.1	1	+	698138	698407	270	1	Novel_lncRNA	Intergenic LncRNAs	32.74	0.54	-5.92195	7.00239e-102	yes
MSTRG.92	MSTRG.92.1	1	+	699242	699788	547	1	Novel_lncRNA	Others(anti down)	11.22	0.51	-4.45943	1.55987e-72	yes
MSTRG.94	MSTRG.94.1	1	+	710632	710951	320	1	Novel_lncRNA	Others(sense updown)	1.92	0	-10.9069	1.97272e-07	yes
Os01g0113750	Os01t0113750-00	1	+	742883	745165	2091	2	Annotated_lncRNA	ncRNA	2.95	3.23	0.130819	0.0516259
Os01g0114150	Os01t0114150-00	1	+	767384	769651	2149	2	Annotated_lncRNA	ncRNA	0.93	2.23	1.26174	0.0206777	yes
Os01g0115752	Os01t0115752-00	1	+	857905	860521	2131	2	Annotated_lncRNA	ncRNA	5.9	1.66	-1.82953	0.011305	yes
Os01g0117233	Os01t0117233-00	1	+	969539	970666	1128	1	Annotated_lncRNA	ncRNA	4.48	2.77	-0.693613	0.00255838
Os01g0118033	Os01t0118033-00	1	-	1016196	1017917	467	3	Annotated_lncRNA	ncRNA	1.77	2.88	0.702319	0.010598
Os01g0118066	Os01t0118066-01	1	-	1021424	1025533	4110	1	Annotated_lncRNA	ncRNA	25.21	3.69	-2.7723	0.0183057	yes
Os01g0119050	Os01t0119050-01	1	-	1089873	1090174	302	1	Annotated_lncRNA	ncRNA	69.18	8.13	-3.08903	0.0120341	yes
Os01g0119800	Os01t0119800-01	1	-	1125645	1127402	1446	2	Annotated_lncRNA	ncRNA	5.36	1.19	-2.17127	0.000836208	yes
MSTRG.149	MSTRG.149.1	1	+	1214752	1216868	2117	1	Novel_lncRNA	Others(anti down)	4	2.2	-0.862496	6.95703e-35
MSTRG.218	MSTRG.218.1	1	-	1926721	1927544	824	1	Novel_lncRNA	Bidirectional LncRNAs	1.46	1.78	0.285909	0.0723141
Os01g0137066	Os01t0137066-00	1	-	1984341	1985008	533	2	Annotated_lncRNA	ncRNA	0.45	2.35	2.38466	0.00786496	yes
Os01g0137150	Os01t0137150-01	1	-	1992244	1997867	580	2	Annotated_lncRNA	ncRNA	1.25	10.84	3.11636	0.00395916	yes
Os01g0137750	Os01t0137750-00	1	-	2024131	2024778	498	2	Annotated_lncRNA	ncRNA	29.61	6	-2.30305	0.0065285	yes
Os01g0137875	Os01t0137875-00	1	-	2036653	2038001	1236	2	Annotated_lncRNA	ncRNA	6.09	13	1.094	0.0539895
Os01g0138350	Os01t0138350-00	1	-	2051041	2052354	1201	2	Annotated_lncRNA	ncRNA	2.81	2.39	-0.23356	0.0483014
MSTRG.281	MSTRG.281.2	1	+	2435842	2438772	1021	2	Novel_lncRNA	Sense LncRNAs	2.52	1.41	-0.837729	2.02258e-11
MSTRG.283	MSTRG.283.1	1	+	2459488	2462156	726	2	Novel_lncRNA	Intergenic LncRNAs	2.68	0.45	-2.57424	5.5754e-19	yes
MSTRG.285	MSTRG.285.1	1	+	2524647	2524926	280	1	Novel_lncRNA	Intergenic LncRNAs	100.92	58.82	-0.778833	7.80519e-102
Os01g0147650	Os01t0147650-00	1	-	2575172	2575564	393	1	Annotated_lncRNA	ncRNA	0.3	1.54	2.3599	0.025542	yes
Os01g0147950	Os01t0147950-00	1	+	2589897	2593567	988	8	Annotated_lncRNA	ncRNA	10.13	8.04	-0.333367	0.0600312
MSTRG.312	MSTRG.312.3	1	+	2772941	2774161	834	4	Novel_lncRNA	Sense LncRNAs	8.54	8.78	0.0399849	2.81449e-10
MSTRG.328	MSTRG.328.1	1	-	2861811	2862100	290	1	Novel_lncRNA	Antisense LncRNAs	1.79	1.05	-0.76957	0.010458
MSTRG.333	MSTRG.333.1	1	-	2872119	2872355	237	1	Novel_lncRNA	Antisense LncRNAs	0	0.75	9.55075	0.0755238
Os01g0154550	Os01t0154550-01	1	-	2926706	2927875	1170	1	Annotated_lncRNA	ncRNA	12.71	20.52	0.691067	0.00611456
MSTRG.372	MSTRG.372.1	1	+	3379400	3379891	492	1	Novel_lncRNA	Intergenic LncRNAs	2.37	0.98	-1.27403	1.53353e-07	yes
MSTRG.378	MSTRG.378.2	1	+	3431611	3434075	2000	3	Novel_lncRNA	Sense LncRNAs	1.45	0.09	-4.00998	9.89267e-35	yes
Os01g0168350	Os01t0168350-00	1	+	3495948	3496585	638	1	Annotated_lncRNA	ncRNA	10.88	2.56	-2.08746	0.00975599	yes
MSTRG.409	MSTRG.409.1	1	-	3720138	3723145	1465	4	Novel_lncRNA	Sense LncRNAs	1.49	0.85	-0.809778	1.42042e-09
Os01g0178775	Os01t0178775-00	1	-	4092625	4094164	972	4	Annotated_lncRNA	ncRNA	25.65	1.39	-4.2058	0.0635113
MSTRG.447	MSTRG.447.1	1	-	4095856	4096145	290	1	Novel_lncRNA	Intergenic LncRNAs	2.01	0.52	-1.95061	1.59597e-05	yes
Os01g0179750	Os01t0179750-00	1	+	4160867	4163366	683	6	Annotated_lncRNA	ncRNA	13.41	8.51	-0.656078	0.0910647
MSTRG.469	MSTRG.469.1	1	-	4281715	4283625	387	2	Novel_lncRNA	Sense LncRNAs	1.06	2.37	1.16082	0.801352
MSTRG.481	MSTRG.481.1	1	-	4423907	4426863	1082	5	Novel_lncRNA	Sense LncRNAs	2	0.61	-1.71312	1.51796e-15	yes
Os01g0185350	Os01t0185350-01	1	-	4531622	4532654	1033	1	Annotated_lncRNA	ncRNA	4.03	2.84	-0.504889	0.0593259
Os01g0187200	Os01t0187200-01	1	+	4665786	4667062	1277	1	Annotated_lncRNA	ncRNA	1.32	3.1	1.23173	0.00136236	yes
MSTRG.515	MSTRG.515.5	1	+	4791837	4794935	993	5	Novel_lncRNA	Sense LncRNAs	1.06	0	-10.0498	3.6644e-12	yes
Os01g0192700	Os01t0192700-00	1	+	4982399	4985113	1250	10	Annotated_lncRNA	ncRNA	1.21	1.36	0.1686	2.0902e-05
MSTRG.536	MSTRG.536.1	1	+	5005599	5005890	292	1	Novel_lncRNA	Intergenic LncRNAs	0.25	0	-7.96578	0.281469
Os01g0195100	Os01t0195100-01	1	-	5103843	5108907	640	2	Annotated_lncRNA	ncRNA	2.08	1.33	-0.645157	0.0141815
Os01g0199550	Os01t0199550-00	1	+	5390090	5391282	700	2	Annotated_lncRNA	ncRNA	0	2.26	11.1421	0.00150336	yes
Os01g0200950	Os01t0200950-00	1	-	5497443	5498906	1047	3	Annotated_lncRNA	ncRNA	1.43	0	-10.4818	0.0277285	yes
Os01g0205550	Os01t0205550-00	1	-	5770252	5772046	575	3	Annotated_lncRNA	ncRNA	2.61	5.38	1.04356	0.00969021	yes
Os01g0205800	Os01t0205800-00	1	+	5774960	5778040	1013	8	Annotated_lncRNA	ncRNA	1.45	1.62	0.159941	0.0772428
Os01g0209300	Os01t0209300-00	1	-	5932028	5933355	649	4	Annotated_lncRNA	ncRNA	0	2.79	11.446	0.0194481	yes
Os01g0221800	Os01t0221800-01	1	+	6667187	6667623	350	2	Annotated_lncRNA	ncRNA	16.42	7.25	-1.1794	0.0844759
Os01g0226250	Os01t0226250-00	1	-	6967909	6969059	364	2	Annotated_lncRNA	ncRNA	3.88	0.18	-4.42999	0.0124031	yes
MSTRG.806	MSTRG.806.1	1	+	7761828	7764431	2604	1	Novel_lncRNA	Intergenic LncRNAs	6.74	14.34	1.08922	0.0425313	yes
MSTRG.807	MSTRG.807.1	1	-	7761850	7762967	951	2	Novel_lncRNA	Intergenic LncRNAs	4643.36	13398.2	1.52879	8.06155e-182	yes
Os01g0242333	Os01t0242333-00	1	-	7852782	7854147	769	3	Annotated_lncRNA	ncRNA	22.64	52.37	1.20987	0.0638436
Os01g0242450	Os01t0242450-00	1	-	7856518	7857344	715	2	Annotated_lncRNA	ncRNA	5.06	2.5	-1.01721	0.0030477	yes
Os01g0243450	Os01t0243450-00	1	+	7903637	7904872	1236	1	Annotated_lncRNA	ncRNA	3.87	3.88	0.00372309	0.017952
MSTRG.825	MSTRG.825.1	1	+	7917378	7917848	471	1	Novel_lncRNA	Intergenic LncRNAs	1.45	0.48	-1.59495	1.65847e-05	yes
MSTRG.826	MSTRG.826.1	1	-	7917386	7917848	463	1	Novel_lncRNA	Intergenic LncRNAs	4.2	0.82	-2.35669	4.69562e-18	yes
MSTRG.830	MSTRG.830.1	1	+	7947978	7948286	309	1	Novel_lncRNA	Intergenic LncRNAs	3.44	0	-11.7482	1.84666e-12	yes
MSTRG.839	MSTRG.839.1	1	+	8130258	8130932	571	2	Novel_lncRNA	Sense LncRNAs	0.93	0.39	-1.25376	0.00074439	yes
MSTRG.855	MSTRG.855.1	1	-	8289982	8290735	754	1	Novel_lncRNA	Bidirectional LncRNAs	2.93	4.77	0.703089	0.389
MSTRG.890	MSTRG.890.1	1	+	8577418	8577703	286	1	Novel_lncRNA	Antisense LncRNAs	2.27	0.27	-3.07166	2.58553e-08	yes
MSTRG.895	MSTRG.895.1	1	+	8657086	8658466	977	2	Novel_lncRNA	Sense LncRNAs	0.53	0	-9.04985	2.99997e-06	yes
Os01g0259300	Os01t0259300-01	1	-	8689258	8689797	540	1	Annotated_lncRNA	ncRNA	0.57	1.54	1.4339	0.0137878	yes
Os01g0259933	Os01t0259933-00	1	+	8722666	8723283	612	2	Annotated_lncRNA	ncRNA	0.1	1.82	4.18587	0.0595097
MSTRG.901	MSTRG.901.2	1	+	8722672	8725060	2389	1	Novel_lncRNA	Sense LncRNAs	1.46	0.84	-0.797507	1.21701e-14
Os01g0259966	Os01t0259966-00	1	+	8728995	8729512	518	1	Annotated_lncRNA	ncRNA	1.31	0.1	-3.71149	0.00311971	yes
Os01g0264900	Os01t0264900-01	1	+	9016289	9016581	293	1	Annotated_lncRNA	ncRNA	2.25	4.38	0.961006	0.0795623
Os01g0267050	Os01t0267050-01	1	-	9159637	9160291	655	1	Annotated_lncRNA	ncRNA	10.61	13.7	0.368751	0.0281054
Os01g0276066	Os01t0276066-00	1	-	9659330	9659922	593	1	Annotated_lncRNA	ncRNA	4.3	1.32	-1.7038	0.0867251
Os01g0276650	Os01t0276650-00	1	-	9691036	9691721	604	2	Annotated_lncRNA	ncRNA	9.06	7.94	-0.190372	0.0320031
MSTRG.1002	MSTRG.1002.1	1	-	9809349	9810635	375	2	Novel_lncRNA	Antisense LncRNAs	1.28	0.63	-1.02272	0.00334809	yes
MSTRG.1022	MSTRG.1022.1	1	+	9970352	9970760	409	1	Novel_lncRNA	Antisense LncRNAs	14.52	0.43	-5.07756	2.63353e-69	yes
MSTRG.1023	MSTRG.1023.1	1	+	9971259	9971717	459	1	Novel_lncRNA	Bidirectional LncRNAs	26.29	0.22	-6.90087	2.55084e-138	yes
MSTRG.1024	MSTRG.1024.1	1	+	9973934	9974327	394	1	Novel_lncRNA	Intergenic LncRNAs	50.56	10.35	-2.28837	1.67553e-168	yes
Os01g0290650	Os01t0290650-00	1	+	10514370	10516248	1412	4	Annotated_lncRNA	ncRNA	0.47	1.62	1.78526	0.0333724	yes
Os01g0290901	Os01t0290901-00	1	-	10536286	10536571	286	1	Annotated_lncRNA	ncRNA	329.53	79.38	-2.05356	0.00494801	yes
Os01g0292250	Os01t0292250-00	1	-	10623102	10626765	1185	9	Annotated_lncRNA	ncRNA	6.62	1.61	-2.03977	0.00291948	yes
Os01g0296133	Os01t0296133-00	1	-	10824769	10826165	777	6	Annotated_lncRNA	ncRNA	17.46	352.82	4.33681	0.0716034
MSTRG.1083	MSTRG.1083.1	1	-	10941056	10941871	553	2	Novel_lncRNA	Others(sense updown)	1.88	0.14	-3.74723	9.38094e-13	yes
MSTRG.1085	MSTRG.1085.1	1	-	10944847	10945112	266	1	Novel_lncRNA	Intronic LncRNAs	1.74	0	-10.7649	1.16491e-05	yes
MSTRG.1098	MSTRG.1098.1	1	+	11202731	11203326	596	1	Novel_lncRNA	Antisense LncRNAs	0.49	5.57	3.50682	1.98147e-10	yes
Os01g0304050	Os01t0304050-01	1	+	11253627	11266197	3410	12	Annotated_lncRNA	ncRNA	5.14	5.97	0.215963	8.6557e-07
Os01g0305300	Os01t0305300-01	1	+	11317192	11317678	487	1	Annotated_lncRNA	ncRNA	6.79	3.09	-1.1358	0.0912888
Os01g0310700	Os01t0310700-01	1	+	11670153	11670582	430	1	Annotated_lncRNA	ncRNA	3.19	6.69	1.06845	0.00476464	yes
MSTRG.1155	MSTRG.1155.1	1	+	12170641	12171124	484	1	Novel_lncRNA	Intergenic LncRNAs	9.53	9.98	0.0665636	6.57349e-07
Os01g0322700	Os01t0322700-01	1	+	12301586	12302556	971	1	Annotated_lncRNA	ncRNA	2.73	0	-11.4147	0.0146047	yes
MSTRG.1180	MSTRG.1180.1	1	+	12645595	12646398	804	1	Novel_lncRNA	Antisense LncRNAs	0.97	1.99	1.03671	0.860584
Os01g0330001	Os01t0330001-00	1	-	12735654	12735854	201	1	Annotated_lncRNA	ncRNA	0.53	0.85	0.68147	0.080759
MSTRG.1199	MSTRG.1199.1	1	-	12921581	12924616	826	2	Novel_lncRNA	Antisense LncRNAs	19.15	3.26	-2.5544	1.44679e-146	yes
Os01g0333001	Os01t0333001-00	1	+	12924255	12925541	1013	2	Annotated_lncRNA	ncRNA	6.91	2.1	-1.7183	0.0163478	yes
Os01g0339001	Os01t0339001-00	1	+	13321102	13321852	467	3	Annotated_lncRNA	ncRNA	3.19	5.46	0.775345	0.0694535
Os01g0339950	Os01t0339950-01	1	-	13355416	13358592	3177	1	Annotated_lncRNA	ncRNA	4.07	5.28	0.375509	0.0204619
MSTRG.1247	MSTRG.1247.1	1	-	14137669	14137907	239	1	Novel_lncRNA	Intergenic LncRNAs	137.04	55.54	-1.303	5.74117e-172	yes
MSTRG.1283	MSTRG.1283.1	1	-	14775420	14777961	1207	3	Novel_lncRNA	Intergenic LncRNAs	2.58	1.74	-0.568284	1.05542e-10
Os01g0364412	Os01t0364412-00	1	+	14856428	14858011	745	2	Annotated_lncRNA	ncRNA	22.59	15.34	-0.558386	0.00429064
MSTRG.1294	MSTRG.1294.1	1	+	14955728	14959343	2246	3	Novel_lncRNA	Sense LncRNAs	1.75	0.35	-2.32193	7.03168e-35	yes
Os01g0367201	Os01t0367201-00	1	+	14993500	14996713	704	5	Annotated_lncRNA	ncRNA	1.96	1.76	-0.155278	0.0573153
Os01g0367450	Os01t0367450-00	1	+	15019896	15021709	819	5	Annotated_lncRNA	ncRNA	2.24	7.05	1.65412	0.069749
Os01g0373800	Os01t0373800-01	1	-	15403221	15403783	563	1	Annotated_lncRNA	ncRNA	1.97	0.51	-1.94963	0.00494801	yes
Os01g0376200	Os01t0376200-01	1	+	15542003	15542526	524	1	Annotated_lncRNA	ncRNA	37.25	23.37	-0.672583	0.0654649
MSTRG.1336	MSTRG.1336.1	1	-	16102212	16103291	1080	1	Novel_lncRNA	Intronic LncRNAs	16.02	8.5	-0.914339	4.13182e-72
MSTRG.1338	MSTRG.1338.1	1	+	16202602	16205004	789	4	Novel_lncRNA	Intergenic LncRNAs	2.38	0.67	-1.82873	1.7314e-14	yes
MSTRG.1340	MSTRG.1340.1	1	+	16232158	16234453	1336	4	Novel_lncRNA	Sense LncRNAs	22.82	8.97	-1.34712	4.1769e-165	yes
MSTRG.1360	MSTRG.1360.1	1	-	17225386	17231229	2775	4	Novel_lncRNA	Sense LncRNAs	2.01	0.15	-3.74416	5.98965e-67	yes
MSTRG.1361	MSTRG.1361.1	1	+	17230076	17230302	227	1	Novel_lncRNA	Others(anti down)	2.86	0	-11.4818	1.01078e-07	yes
MSTRG.1373	MSTRG.1373.3	1	-	17422915	17429381	1026	7	Novel_lncRNA	Sense LncRNAs	1.11	1.23	0.148099	0.0251676
Os01g0508050	Os01t0508050-00	1	-	17756330	17761039	475	2	Annotated_lncRNA	ncRNA	43.96	10.29	-2.09495	0.00372347	yes
Os01g0518550	Os01t0518550-00	1	+	18394494	18401646	1994	12	Annotated_lncRNA	ncRNA	6.82	2.89	-1.2387	0.00689367	yes
MSTRG.1444	MSTRG.1444.1	1	+	18677754	18678134	381	1	Novel_lncRNA	Antisense LncRNAs	0	11.44	13.4818	5.96319e-26	yes
MSTRG.1446	MSTRG.1446.1	1	+	18683564	18685167	1604	1	Novel_lncRNA	Antisense LncRNAs	4.51	1.66	-1.44194	1.54821e-44	yes
MSTRG.1449	MSTRG.1449.1	1	-	18688217	18688507	291	1	Novel_lncRNA	Others(anti down)	2.01	0.44	-2.19162	1.59597e-05	yes
MSTRG.1450	MSTRG.1450.1	1	-	18689070	18689527	458	1	Novel_lncRNA	Others(anti down)	1.13	0.22	-2.36075	1.65751e-05	yes
Os01g0525500	Os01t0525500-01	1	+	18823738	18834467	932	4	Annotated_lncRNA	ncRNA	7.61	4.32	-0.816865	0.0438179
MSTRG.1457	MSTRG.1457.1	1	+	18826753	18826971	219	1	Novel_lncRNA	Others(sense updown)	9.04	3.01	-1.58656	7.40648e-14	yes
Os01g0527801	Os01t0527801-00	1	+	18968590	18968931	342	1	Annotated_lncRNA	ncRNA	9.79	7.38	-0.407688	0.0132483
Os01g0530316	Os01t0530316-01	1	+	19083072	19083314	243	1	Annotated_lncRNA	ncRNA	0.68	0	-9.40939	0.0961027
Os01g0530650	Os01t0530650-01	1	-	19106755	19107548	707	2	Annotated_lncRNA	ncRNA	0.16	0.6	1.90689	0.0857952
Os01g0532750	Os01t0532750-00	1	+	19246636	19248017	1321	2	Annotated_lncRNA	ncRNA	1.88	3.6	0.937264	0.0468269
Os01g0535001	Os01t0535001-00	1	+	19398513	19403233	1384	7	Annotated_lncRNA	ncRNA	3.27	1.06	-1.62523	0.0704007
Os01g0544325	Os01t0544325-00	1	-	20153653	20156094	1416	3	Annotated_lncRNA	ncRNA	7.44	2.87	-1.37425	0.000266121	yes
MSTRG.1513	MSTRG.1513.1	1	-	20210196	20212223	2028	1	Novel_lncRNA	Sense LncRNAs	2	2.65	0.405992	0.00352561
MSTRG.1526	MSTRG.1526.1	1	+	20442784	20443158	375	1	Novel_lncRNA	Intergenic LncRNAs	218.8	122.1	-0.84155	0
MSTRG.1527	MSTRG.1527.1	1	-	20445929	20446238	310	1	Novel_lncRNA	Intergenic LncRNAs	0.84	0.16	-2.39232	0.00826666	yes
Os01g0549600	Os01t0549600-00	1	+	20535253	20537852	1744	4	Annotated_lncRNA	ncRNA	273.41	95.36	-1.51961	0.0103486	yes
Os01g0550250	Os01t0550250-00	1	-	20598327	20598592	266	1	Annotated_lncRNA	ncRNA	6.18	62.82	3.34555	0.00708135	yes
Os01g0550850	Os01t0550850-00	1	-	20641271	20643562	1057	5	Annotated_lncRNA	ncRNA	2.16	1.94	-0.154975	0.0109462
MSTRG.1552	MSTRG.1552.3	1	+	20816985	20820444	1142	5	Novel_lncRNA	Sense LncRNAs	1.2	1.03	-0.22039	0.000539069
MSTRG.1554	MSTRG.1554.1	1	+	20867629	20868694	1066	1	Novel_lncRNA	Intergenic LncRNAs	0.58	1.38	1.25054	0.512934
Os01g0559525	Os01t0559525-00	1	-	21195401	21201532	2387	10	Annotated_lncRNA	ncRNA	2.49	6.65	1.41721	0.0677777
Os01g0559550	Os01t0559550-00	1	+	21201971	21203280	715	2	Annotated_lncRNA	ncRNA	2.1	0.88	-1.25481	0.0390733	yes
Os01g0559900	Os01t0559900-01	1	+	21261805	21262418	614	1	Annotated_lncRNA	ncRNA	3.55	0.12	-4.88671	0.0720158
MSTRG.1591	MSTRG.1591.1	1	+	21631182	21633045	746	2	Novel_lncRNA	Sense LncRNAs	8.23	10.94	0.410648	0.000312236
Os01g0566701	Os01t0566701-00	1	-	21687437	21687759	323	1	Annotated_lncRNA	ncRNA	21	18.41	-0.1899	0.00884962
MSTRG.1646	MSTRG.1646.1	1	+	22675922	22676281	360	1	Novel_lncRNA	Antisense LncRNAs	6.85	3.73	-0.876928	3.59046e-11
MSTRG.1659	MSTRG.1659.1	1	+	22788140	22788626	487	1	Novel_lncRNA	Intergenic LncRNAs	2.86	4.84	0.758992	0.633638
Os01g0593650	Os01t0593650-00	1	-	23240010	23243436	748	3	Annotated_lncRNA	ncRNA	2.2	3.83	0.799841	0.00020226
MSTRG.1708	MSTRG.1708.1	1	-	23431439	23437805	546	3	Novel_lncRNA	Intergenic LncRNAs	0.18	3.71	4.36535	2.11352e-08	yes
MSTRG.1726	MSTRG.1726.1	1	-	23776275	23780692	4418	1	Novel_lncRNA	Antisense LncRNAs	1.22	0.18	-2.76081	1.75875e-55	yes
Os01g0610050	Os01t0610050-00	1	-	24124911	24125477	567	1	Annotated_lncRNA	ncRNA	14.04	11.23	-0.322185	0.0200418
Os01g0613400	Os01t0613400-01	1	+	24341881	24342143	263	1	Annotated_lncRNA	ncRNA	4.06	5.28	0.379058	0.0833569
Os01g0617950	Os01t0617950-00	1	-	24573161	24575450	953	10	Annotated_lncRNA	ncRNA	14.55	18.52	0.348065	0.0366249
Os01g0618450	Os01t0618450-00	1	-	24600440	24601304	545	3	Annotated_lncRNA	ncRNA	11.01	15.45	0.488792	0.0275534
Os01g0618601	Os01t0618601-00	1	-	24604342	24605096	541	3	Annotated_lncRNA	ncRNA	4.08	8.96	1.13493	0.0443437	yes
MSTRG.1821	MSTRG.1821.1	1	+	24615728	24843459	537	2	Novel_lncRNA	Sense LncRNAs	2510.48	7786.59	1.63303	4.767e-228	yes
MSTRG.1827	MSTRG.1827.1	1	-	24696532	24697792	515	3	Novel_lncRNA	Sense LncRNAs	33.69	76	1.17368	0.00160229	yes
Os01g0624133	Os01t0624133-00	1	+	24913803	24922792	2465	9	Annotated_lncRNA	ncRNA	1.31	2.6	0.988945	0.0306317
Os01g0626350	Os01t0626350-00	1	+	25004212	25004702	491	1	Annotated_lncRNA	ncRNA	3.1	0	-11.5981	0.0634436
MSTRG.1864	MSTRG.1864.1	1	-	25018995	25021590	2596	1	Novel_lncRNA	Sense LncRNAs	5.9	1.62	-1.86472	7.38104e-112	yes
MSTRG.1864	MSTRG.1864.3	1	-	25019197	25021590	2296	2	Novel_lncRNA	Sense LncRNAs	3.96	0.27	-3.87447	5.04096e-108	yes
MSTRG.1885	MSTRG.1885.2	1	+	25319753	25321936	635	5	Novel_lncRNA	Intergenic LncRNAs	2.04	1.18	-0.789782	3.87361e-06
MSTRG.1885	MSTRG.1885.1	1	+	25319753	25321936	541	4	Novel_lncRNA	Intergenic LncRNAs	2.58	4.61	0.837396	0.833074
Os01g0633800	Os01t0633800-01	1	-	25402257	25406520	4264	1	Annotated_lncRNA	ncRNA	0.37	1.43	1.95042	0.00467788	yes
Os01g0641050	Os01t0641050-00	1	+	25758466	25759042	577	1	Annotated_lncRNA	ncRNA	12.85	6.21	-1.0491	0.045168	yes
Os01g0646400	Os01t0646400-01	1	+	26051925	26053759	523	3	Annotated_lncRNA	ncRNA	0.93	2.54	1.44953	0.0479744	yes
Os01g0650501	Os01t0650501-00	1	+	26267753	26268020	268	1	Annotated_lncRNA	ncRNA	0.14	3.57	4.67243	0.0238538	yes
Os01g0652650	Os01t0652650-00	1	-	26394775	26395343	350	3	Annotated_lncRNA	ncRNA	212.39	154.27	-0.461258	0.0751471
Os01g0654150	Os01t0654150-00	1	-	26514730	26520699	1628	12	Annotated_lncRNA	ncRNA	5.05	0.7	-2.85086	0.0462416	yes
Os01g0654650	Os01t0654650-00	1	+	26533645	26537119	1220	8	Annotated_lncRNA	ncRNA	5.76	4.84	-0.251062	0.0124665
Os01g0667725	Os01t0667725-00	1	+	27303408	27307393	1783	6	Annotated_lncRNA	ncRNA	1.68	3.07	0.869777	0.0157319
Os01g0670200	Os01t0670200-01	1	+	27482811	27486797	1572	2	Annotated_lncRNA	ncRNA	1.24	1.84	0.569366	0.0250596
Os01g0672600	Os01t0672600-01	1	-	27623546	27623897	352	1	Annotated_lncRNA	ncRNA	4.7	0.12	-5.29155	0.0421159	yes
Os01g0673650	Os01t0673650-00	1	+	27668621	27669424	458	3	Annotated_lncRNA	ncRNA	1.6	0.41	-1.96438	0.0161654	yes
Os01g0674450	Os01t0674450-01	1	-	27714617	27715319	584	2	Annotated_lncRNA	ncRNA	7.38	0	-12.8494	0.0102927	yes
Os01g0678900	Os01t0678900-01	1	-	27934099	27935001	766	2	Annotated_lncRNA	ncRNA	27.74	7.05	-1.97627	0.0714859
MSTRG.2132	MSTRG.2132.1	1	-	28153791	28154508	718	1	Novel_lncRNA	Intergenic LncRNAs	5.06	4.87	-0.0552156	9.34843e-07
Os01g0684400	Os01t0684400-01	1	+	28199717	28200167	451	1	Annotated_lncRNA	ncRNA	5.36	2.91	-0.881214	0.0773334
MSTRG.2148	MSTRG.2148.1	1	+	28295136	28299924	2452	6	Novel_lncRNA	Sense LncRNAs	3.47	0.67	-2.3727	7.96455e-76	yes
MSTRG.2148	MSTRG.2148.3	1	+	28295763	28299924	2879	4	Novel_lncRNA	Sense LncRNAs	1.41	0.47	-1.58496	7.23805e-28	yes
MSTRG.2162	MSTRG.2162.1	1	+	28381744	28382217	474	1	Novel_lncRNA	Antisense LncRNAs	1.14	0.07	-4.02554	7.68392e-07	yes
MSTRG.2177	MSTRG.2177.1	1	-	28530742	28530968	227	1	Novel_lncRNA	Bidirectional LncRNAs	16.44	7.59	-1.11504	2.46446e-19	yes
Os01g0695150	Os01t0695150-00	1	-	28741829	28744493	1340	9	Annotated_lncRNA	ncRNA	10.7	8.76	-0.288608	0.0703976
Os01g0698500	Os01t0698500-01	1	-	28900223	28903951	437	2	Annotated_lncRNA	ncRNA	18.91	28.74	0.603911	0.0281618
MSTRG.2238	MSTRG.2238.1	1	+	29165565	29165972	408	1	Novel_lncRNA	Others(sense updown),Others(anti down)	2.31	0.62	-1.89755	5.39519e-08	yes
Os01g0704250	Os01t0704250-00	1	-	29196123	29197064	890	2	Annotated_lncRNA	ncRNA	1.19	0.68	-0.807355	7.87856e-08
MSTRG.2243	MSTRG.2243.1	1	-	29196123	29197064	942	1	Novel_lncRNA	Sense LncRNAs	1.03	9.73	3.2398	4.4885e-24	yes
MSTRG.2246	MSTRG.2246.1	1	-	29212951	29214357	1320	2	Novel_lncRNA	Intergenic LncRNAs	1.57	0.29	-2.43664	1.09732e-19	yes
MSTRG.2251	MSTRG.2251.1	1	+	29247022	29249563	436	3	Novel_lncRNA	Sense LncRNAs	3.8	3.03	-0.326682	4.18511e-05
Os01g0706850	Os01t0706850-00	1	+	29326816	29327360	545	1	Annotated_lncRNA	ncRNA	0	6.67	12.7035	0.00932106	yes
Os01g0708350	Os01t0708350-00	1	-	29431941	29434694	1380	7	Annotated_lncRNA	ncRNA	20.1	5.25	-1.93681	0.0427753	yes
Os01g0708400	Os01t0708400-01	1	+	29436121	29436450	330	1	Annotated_lncRNA	ncRNA	8.22	6.69	-0.297132	0.0904218
Os01g0716900	Os01t0716900-00	1	-	29830608	29835803	1732	9	Annotated_lncRNA	ncRNA	8.87	2.67	-1.73209	0.0236582	yes
Os01g0720200	Os01t0720200-01	1	-	30020954	30021230	277	1	Annotated_lncRNA	ncRNA	19.05	12.71	-0.583827	0.0116485
Os01g0723450	Os01t0723450-00	1	-	30166607	30171070	1534	15	Annotated_lncRNA	ncRNA	3.23	1.05	-1.62114	0.0258375	yes
MSTRG.2351	MSTRG.2351.1	1	-	30238729	30238934	206	1	Novel_lncRNA	Intergenic LncRNAs	0.31	21.28	6.10109	4.27072e-22	yes
MSTRG.2358	MSTRG.2358.1	1	+	30277913	30279269	1357	1	Novel_lncRNA	Antisense LncRNAs	0.41	1.1	1.42381	0.254595
Os01g0726801	Os01t0726801-01	1	+	30298621	30299053	433	1	Annotated_lncRNA	ncRNA	2.83	0	-11.4666	0.0218736	yes
MSTRG.2377	MSTRG.2377.2	1	+	30381185	30383228	971	5	Novel_lncRNA	Sense LncRNAs	4.27	0.4	-3.41616	1.68666e-48	yes
Os01g0735632	Os01t0735632-01	1	+	30682077	30682578	502	1	Annotated_lncRNA	ncRNA	9.3	17.75	0.932516	0.0234898
Os01g0743666	Os01t0743666-00	1	-	31079332	31079810	479	1	Annotated_lncRNA	ncRNA	17.63	2.54	-2.79513	0.0381697	yes
Os01g0750050	Os01t0750050-00	1	-	31404004	31406894	590	2	Annotated_lncRNA	ncRNA	1.36	0.54	-1.33258	0.0910737
Os01g0756501	Os01t0756501-00	1	+	31740713	31742519	302	3	Annotated_lncRNA	ncRNA	48.04	59.01	0.296723	0.0524755
Os01g0757051	Os01t0757051-00	1	-	31787536	31788089	554	1	Annotated_lncRNA	ncRNA	13.73	4.65	-1.56203	0.00774016	yes
Os01g0757301	Os01t0757301-00	1	-	31795255	31796095	841	1	Annotated_lncRNA	ncRNA	3.43	2.38	-0.527247	0.000216847
Os01g0764750	Os01t0764750-00	1	-	32190478	32192585	1327	5	Annotated_lncRNA	ncRNA	11.72	2.81	-2.06033	0.0236481	yes
Os01g0769100	Os01t0769100-01	1	+	32442999	32443312	314	1	Annotated_lncRNA	ncRNA	99.83	23.59	-2.0813	0.0484449	yes
MSTRG.2618	MSTRG.2618.1	1	+	32461337	32461686	350	1	Novel_lncRNA	Others(sense updown)	1.11	0.29	-1.93643	0.00178776	yes
Os01g0771950	Os01t0771950-00	1	+	32581323	32584446	1614	8	Annotated_lncRNA	ncRNA	0	5.68	12.4717	0.0937338
Os01g0773350	Os01t0773350-01	1	-	32683149	32686250	3064	2	Annotated_lncRNA	ncRNA	12.67	6.35	-0.996588	0.000170247
Os01g0777900	Os01t0777900-01	1	+	32934209	32934997	584	3	Annotated_lncRNA	ncRNA	76.49	47.07	-0.700463	0.0987453
MSTRG.2674	MSTRG.2674.1	1	+	32945043	32945499	457	1	Novel_lncRNA	Intergenic LncRNAs	2.91	5.21	0.840264	0.893369
MSTRG.2740	MSTRG.2740.1	1	-	33497813	33553668	553	2	Novel_lncRNA	Intergenic LncRNAs	609.29	737.3	0.275123	9.61853e-123
MSTRG.2742	MSTRG.2742.1	1	-	33504923	33559832	324	2	Novel_lncRNA	Intergenic LncRNAs	0.58	0.26	-1.15754	0.130777
MSTRG.2754	MSTRG.2754.1	1	-	33684050	33688518	865	4	Novel_lncRNA	Antisense LncRNAs	1.76	0.5	-1.81558	4.75209e-12	yes
MSTRG.2756	MSTRG.2756.2	1	-	33692513	33696504	1226	3	Novel_lncRNA	Antisense LncRNAs	1.21	0.33	-1.87447	8.49675e-12	yes
MSTRG.2823	MSTRG.2823.1	1	-	34370168	34370368	201	1	Novel_lncRNA	Intergenic LncRNAs	0.32	0	-8.32193	0.281469
MSTRG.2824	MSTRG.2824.1	1	-	34375226	34375467	242	1	Novel_lncRNA	Intergenic LncRNAs	0.4	0.1	-2	0.148171
MSTRG.2825	MSTRG.2825.1	1	+	34375227	34375467	241	1	Novel_lncRNA	Intergenic LncRNAs	0.54	0.11	-2.29546	0.0755238
Os01g0810401	Os01t0810401-01	1	+	34427858	34434677	2266	5	Annotated_lncRNA	ncRNA	3.77	1.35	-1.48161	0.00688279	yes
MSTRG.2832	MSTRG.2832.2	1	+	34427866	34436126	4124	3	Novel_lncRNA	Antisense LncRNAs	2.37	0.45	-2.39689	1.39769e-87	yes
Os01g0810833	Os01t0810833-01	1	+	34449889	34452565	2641	2	Annotated_lncRNA	ncRNA	0.33	0.83	1.33065	0.0620841
MSTRG.2840	MSTRG.2840.1	1	+	34497427	34497654	228	1	Novel_lncRNA	Intergenic LncRNAs	3.27	0.33	-3.30875	3.3312e-09	yes
Os01g0812025	Os01t0812025-00	1	-	34509409	34512763	2036	3	Annotated_lncRNA	ncRNA	0.65	1.63	1.32636	0.0211907	yes
Os01g0814550	Os01t0814550-00	1	+	34641171	34641617	447	1	Annotated_lncRNA	ncRNA	7.03	5.24	-0.423958	0.0303518
Os01g0816450	Os01t0816450-00	1	+	34718448	34722319	1014	9	Annotated_lncRNA	ncRNA	2.97	1.05	-1.50007	0.00552195	yes
Os01g0816550	Os01t0816550-01	1	-	34738321	34746452	777	3	Annotated_lncRNA	ncRNA	0.38	1.45	1.93198	0.0633004
Os01g0818650	Os01t0818650-00	1	+	34869233	34870411	712	4	Annotated_lncRNA	ncRNA	11.88	2.03	-2.54898	0.0586951
Os01g0819466	Os01t0819466-00	1	-	34939026	34941610	465	4	Annotated_lncRNA	ncRNA	7.82	2.27	-1.78448	0.0457646	yes
MSTRG.2928	MSTRG.2928.1	1	+	35332717	35333445	629	2	Novel_lncRNA	Sense LncRNAs	0.55	0	-9.10329	0.000347537	yes
MSTRG.2942	MSTRG.2942.1	1	+	35465010	35465381	372	1	Novel_lncRNA	Intergenic LncRNAs	0.18	0.27	0.584963	1
MSTRG.2946	MSTRG.2946.1	1	-	35488438	35489828	963	2	Novel_lncRNA	Intergenic LncRNAs	1.85	1.87	0.015513	0.00153321
Os01g0830300	Os01t0830300-01	1	-	35518678	35518983	306	1	Annotated_lncRNA	ncRNA	11.11	0.56	-4.31029	0.0579439
MSTRG.2976	MSTRG.2976.1	1	-	35745526	35749594	3853	3	Novel_lncRNA	Sense LncRNAs	3.4	0.41	-3.05184	2.16916e-140	yes
Os01g0835651	Os01t0835651-00	1	-	35822763	35823507	745	1	Annotated_lncRNA	ncRNA	20.21	11.16	-0.856732	0.00898562
MSTRG.3022	MSTRG.3022.1	1	-	36110955	36111500	546	1	Novel_lncRNA	Intergenic LncRNAs	1.37	0.7	-0.968749	0.000263857
Os01g0844850	Os01t0844850-00	1	-	36279724	36283198	1614	4	Annotated_lncRNA	ncRNA	1	0.03	-5.05889	0.0128921	yes
MSTRG.3041	MSTRG.3041.1	1	-	36318440	36319507	1068	1	Novel_lncRNA	Intergenic LncRNAs	5.45	4.76	-0.195295	1.7793e-12
Os01g0847250	Os01t0847250-00	1	-	36395917	36397667	1114	3	Annotated_lncRNA	ncRNA	6.87	3.79	-0.858112	0.067879
MSTRG.3060	MSTRG.3060.1	1	-	36420027	36422784	2401	5	Novel_lncRNA	Antisense LncRNAs	2.45	0.29	-3.07866	9.30748e-65	yes
MSTRG.3097	MSTRG.3097.1	1	+	36735654	36735922	269	1	Novel_lncRNA	Intronic LncRNAs	0.24	1.7	2.82443	0.092576
Os01g0856550	Os01t0856550-00	1	-	36999014	37004261	1634	7	Annotated_lncRNA	ncRNA	8.92	8.02	-0.153441	0.00114021
Os01g0857100	Os01t0857100-01	1	-	37025077	37025833	757	1	Annotated_lncRNA	ncRNA	6.3	2.7	-1.22239	0.0241853	yes
MSTRG.3161	MSTRG.3161.1	1	-	37409284	37411493	1560	2	Novel_lncRNA	Sense LncRNAs	2.55	0.47	-2.43976	3.10911e-37	yes
Os01g0867400	Os01t0867400-01	1	-	37557352	37558009	658	1	Annotated_lncRNA	ncRNA	3.57	4.78	0.421087	0.00017756
Os01g0867450	Os01t0867450-00	1	+	37559112	37559736	625	1	Annotated_lncRNA	ncRNA	0.51	4.9	3.26421	0.029906	yes
Os01g0872650	Os01t0872650-00	1	-	37843352	37844058	507	2	Annotated_lncRNA	ncRNA	0.73	0.12	-2.60486	0.0280692	yes
Os01g0881450	Os01t0881450-00	1	-	38260043	38261255	1080	3	Annotated_lncRNA	ncRNA	11.61	0	-13.5031	0.0620056
MSTRG.3274	MSTRG.3274.1	1	+	38269765	38270786	1022	1	Novel_lncRNA	Intergenic LncRNAs	2786.46	1767.35	-0.656846	0
Os01g0884050	Os01t0884050-00	1	+	38387088	38390147	1348	7	Annotated_lncRNA	ncRNA	2.13	0.28	-2.92735	0.033307	yes
Os01g0888200	Os01t0888200-01	1	+	38596931	38597801	484	2	Annotated_lncRNA	ncRNA	7.65	3.32	-1.20428	0.0381783	yes
Os01g0889601	Os01t0889601-00	1	-	38677310	38677664	355	1	Annotated_lncRNA	ncRNA	4.09	0.71	-2.52621	0.00704599	yes
Os01g0891800	Os01t0891800-00	1	-	38770441	38771239	650	2	Annotated_lncRNA	ncRNA	2.96	0.69	-2.10093	0.0118043	yes
Os01g0893300	Os01t0893300-01	1	+	38841929	38842417	489	1	Annotated_lncRNA	ncRNA	1.86	0	-10.8611	0.0376534	yes
Os01g0896350	Os01t0896350-00	1	-	38958022	38958438	417	1	Annotated_lncRNA	ncRNA	1.3	0.12	-3.43741	0.0430864	yes
Os01g0897150	Os01t0897150-00	1	-	38987448	38989863	1541	3	Annotated_lncRNA	ncRNA	0.37	0.86	1.21681	0.0893196
MSTRG.3377	MSTRG.3377.1	1	-	39111586	39111917	332	1	Novel_lncRNA	Others(sense updown)	0.49	1.22	1.31603	0.85324
MSTRG.3378	MSTRG.3378.1	1	+	39112534	39112740	207	1	Novel_lncRNA	Intergenic LncRNAs	0.31	0	-8.27612	0.281469
MSTRG.3379	MSTRG.3379.1	1	+	39114201	39114693	493	1	Novel_lncRNA	Others(anti down)	237.5	115.33	-1.04216	0	yes
MSTRG.3381	MSTRG.3381.1	1	-	39116718	39117521	804	1	Novel_lncRNA	Antisense LncRNAs	1.13	0.47	-1.26559	4.93991e-06	yes
MSTRG.3383	MSTRG.3383.1	1	-	39118150	39127408	317	2	Novel_lncRNA	Others(anti down)	6.65	2.56	-1.37721	4.26847e-13	yes
MSTRG.3385	MSTRG.3385.1	1	-	39125522	39125727	206	1	Novel_lncRNA	Intergenic LncRNAs	0.16	0.12	-0.415037	1
Os01g0901101	Os01t0901101-00	1	+	39224137	39225456	930	4	Annotated_lncRNA	ncRNA	293.5	74.06	-1.98659	0.00730357	yes
Os01g0908301	Os01t0908301-01	1	+	39544770	39545927	1158	1	Annotated_lncRNA	ncRNA	1.87	3	0.681924	0.000553786
Os01g0911133	Os01t0911133-00	1	+	39690105	39690626	437	2	Annotated_lncRNA	ncRNA	9.03	1.42	-2.66884	0.00783098	yes
Os01g0911250	Os01t0911250-00	1	-	39702320	39703135	629	3	Annotated_lncRNA	ncRNA	3.22	31.88	3.30752	0.013585	yes
MSTRG.3465	MSTRG.3465.1	1	+	39845391	39846627	693	3	Novel_lncRNA	Antisense LncRNAs	1.72	2.35	0.450252	0.177567
Os01g0915300	Os01t0915300-01	1	-	39878610	39881467	2858	1	Annotated_lncRNA	ncRNA	2.71	0.48	-2.49719	0.039189	yes
MSTRG.3532	MSTRG.3532.1	1	+	40390574	40393093	1101	3	Novel_lncRNA	Sense LncRNAs	4.59	0.57	-3.00946	5.38928e-55	yes
Os01g0924500	Os01t0924500-01	1	+	40479136	40479456	321	1	Annotated_lncRNA	ncRNA	41.35	17.14	-1.27052	0.0133322	yes
Os01g0925350	Os01t0925350-00	1	+	40567146	40567620	475	1	Annotated_lncRNA	ncRNA	1.72	2.19	0.348522	0.0691237
Os01g0933300	Os01t0933300-01	1	+	40933062	40935029	1321	2	Annotated_lncRNA	ncRNA	2.31	1.14	-1.01886	0.00892095	yes
Os01g0934901	Os01t0934901-00	1	-	41010333	41010895	563	1	Annotated_lncRNA	ncRNA	4.07	15.67	1.9449	0.0375126	yes
Os01g0936850	Os01t0936850-00	1	+	41117827	41118161	335	1	Annotated_lncRNA	ncRNA	27.01	4.13	-2.70928	0.0307307	yes
Os01g0939550	Os01t0939550-01	1	+	41243980	41244372	393	1	Annotated_lncRNA	ncRNA	1.49	0.1	-3.89724	0.00781955	yes
Os01g0939901	Os01t0939901-00	1	+	41267049	41267308	260	1	Annotated_lncRNA	ncRNA	2.54	0.66	-1.94429	0.0564509
MSTRG.3662	MSTRG.3662.1	1	-	41455404	41494962	1406	3	Novel_lncRNA	Sense LncRNAs	6.16	1.21	-2.34792	1.62197e-76	yes
MSTRG.3663	MSTRG.3663.1	1	+	41455579	41494809	985	3	Novel_lncRNA	Antisense LncRNAs	230.46	225.08	-0.0340785	3.55921e-209
Os01g0948133	Os01t0948133-01	1	-	41698428	41699108	681	1	Annotated_lncRNA	ncRNA	25.46	8.43	-1.59463	0.0804897
MSTRG.3683	MSTRG.3683.1	1	-	41728692	41729581	577	3	Novel_lncRNA	Sense LncRNAs	43.53	53.05	0.285343	1.78229e-18
MSTRG.3722	MSTRG.3722.1	1	-	42112499	42113292	794	1	Novel_lncRNA	Intergenic LncRNAs	6.58	1.44	-2.19202	5.68909e-45	yes
Os01g0960450	Os01t0960450-00	1	+	42337885	42339733	703	3	Annotated_lncRNA	ncRNA	7.19	5.03	-0.515433	0.0623937
Os01g0963350	Os01t0963350-00	1	+	42448946	42449672	633	2	Annotated_lncRNA	ncRNA	8.93	0	-13.1244	0.0262138	yes
Os01g0971550	Os01t0971550-00	1	-	42858983	42860280	438	3	Annotated_lncRNA	ncRNA	9.53	0.92	-3.37277	0.0818053
Os01g0978175	Os01t0978175-00	1	+	43235257	43237244	414	2	Annotated_lncRNA	ncRNA	0.65	2.34	1.848	0.0493963	yes
MSTRG.3873	MSTRG.3873.2	2	+	153234	156036	2586	2	Novel_lncRNA	Sense LncRNAs	2.56	0.1	-4.67807	1.5479e-77	yes
MSTRG.3897	MSTRG.3897.2	2	+	317677	319099	404	4	Novel_lncRNA	Antisense LncRNAs	0.08	1.07	3.74147	0.0436553	yes
Os02g0114066	Os02t0114066-00	2	+	759110	759589	480	1	Annotated_lncRNA	ncRNA	2.95	1.64	-0.847019	0.0136335
MSTRG.3939	MSTRG.3939.1	2	-	783686	784795	1110	1	Novel_lncRNA	Others(sense updown)	6.31	9.24	0.550253	0.00479012
Os02g0114900	Os02t0114900-00	2	-	794820	795082	263	1	Annotated_lncRNA	ncRNA	4.33	4.71	0.12136	0.0158655
MSTRG.3942	MSTRG.3942.1	2	+	816983	818337	1355	1	Novel_lncRNA	Others(sense updown),Others(anti down)	54.7	37.68	-0.537742	9.24402e-204
Os02g0120850	Os02t0120850-00	2	+	1080561	1082635	816	6	Annotated_lncRNA	ncRNA	19.76	25.71	0.379747	0.0111891
Os02g0126900	Os02t0126900-01	2	-	1402649	1405694	3046	1	Annotated_lncRNA	ncRNA	2.81	2.77	-0.0206842	0.0165646
Os02g0128501	Os02t0128501-00	2	-	1476515	1479790	627	5	Annotated_lncRNA	ncRNA	82.11	6.1	-3.75068	0.0477071	yes
MSTRG.4096	MSTRG.4096.1	2	-	1946332	1949354	638	3	Novel_lncRNA	Sense LncRNAs	2.23	1.6	-0.478972	4.22616e-05
Os02g0142850	Os02t0142850-01	2	-	2372150	2373061	912	1	Annotated_lncRNA	ncRNA	2.15	4.7	1.12832	0.00118317	yes
MSTRG.4138	MSTRG.4138.1	2	+	2516847	2519232	399	2	Novel_lncRNA	Sense LncRNAs	2.24	4.88	1.12338	0.645454
Os02g0147850	Os02t0147850-00	2	-	2621674	2622657	375	2	Annotated_lncRNA	ncRNA	33.27	98.7	1.56883	0.00567728	yes
Os02g0149650	Os02t0149650-01	2	-	2732117	2735185	3069	1	Annotated_lncRNA	ncRNA	5.49	5.68	0.0490848	0.00138896
Os02g0152750	Os02t0152750-00	2	+	2912568	2912869	302	1	Annotated_lncRNA	ncRNA	0.6	10.18	4.08463	0.012439	yes
Os02g0157700	Os02t0157700-01	2	-	3144129	3144623	495	1	Annotated_lncRNA	ncRNA	4.86	6.1	0.327853	0.087694
Os02g0161400	Os02t0161400-01	2	+	3318065	3318354	290	1	Annotated_lncRNA	ncRNA	0.76	0.97	0.351985	0.0483308
Os02g0162050	Os02t0162050-00	2	+	3345017	3345473	360	2	Annotated_lncRNA	ncRNA	15.96	16.13	0.0152858	0.0240374
Os02g0162700	Os02t0162700-01	2	-	3362834	3364270	660	3	Annotated_lncRNA	ncRNA	28.46	11.36	-1.32497	0.0439584	yes
Os02g0162783	Os02t0162783-00	2	+	3384035	3384907	381	2	Annotated_lncRNA	ncRNA	25.84	351.68	3.76659	0.00431212	yes
MSTRG.4244	MSTRG.4244.1	2	-	3405413	3405727	315	1	Novel_lncRNA	Intergenic LncRNAs	2.99	2.57	-0.218377	0.00589043
Os02g0166200	Os02t0166200-01	2	+	3557488	3560496	2248	2	Annotated_lncRNA	ncRNA	2.98	0.2	-3.89724	0.00207265	yes
MSTRG.4261	MSTRG.4261.1	2	+	3557488	3560496	561	3	Novel_lncRNA	Sense LncRNAs	0.66	1.14	0.788496	0.899577
Os02g0169275	Os02t0169275-00	2	-	3741693	3742632	888	2	Annotated_lncRNA	ncRNA	22.77	11.36	-1.00317	0.0376187	yes
Os02g0170150	Os02t0170150-00	2	-	3829446	3829814	369	1	Annotated_lncRNA	ncRNA	2.06	0.58	-1.82852	0.046389	yes
Os02g0171001	Os02t0171001-00	2	+	3861702	3862553	678	2	Annotated_lncRNA	ncRNA	4.72	5.2	0.139725	0.00201954
MSTRG.4331	MSTRG.4331.1	2	-	4141498	4141889	392	1	Novel_lncRNA	Antisense LncRNAs	0.41	1.75	2.09366	0.145623
Os02g0175850	Os02t0175850-00	2	-	4143281	4143494	214	1	Annotated_lncRNA	ncRNA	6.1	10.3	0.755763	0.0889886
Os02g0176650	Os02t0176650-01	2	-	4195529	4195944	416	1	Annotated_lncRNA	ncRNA	2.11	3.12	0.564303	0.000872774
Os02g0178300	Os02t0178300-00	2	-	4326102	4326332	231	1	Annotated_lncRNA	ncRNA	2.94	3.41	0.213956	0.0909606
Os02g0180800	Os02t0180800-01	2	-	4500090	4513333	1605	5	Annotated_lncRNA	ncRNA	1.08	0.05	-4.43296	0.0776015
MSTRG.4370	MSTRG.4370.2	2	-	4508414	4513211	3734	5	Novel_lncRNA	Sense LncRNAs	2.32	0.97	-1.25807	1.81975e-47	yes
Os02g0189500	Os02t0189500-01	2	-	4958466	4958880	415	1	Annotated_lncRNA	ncRNA	11.3	6.41	-0.817927	0.000897819
MSTRG.4419	MSTRG.4419.1	2	+	4967952	4972721	683	2	Novel_lncRNA	Sense LncRNAs	4.73	1.76	-1.42626	3.31612e-20	yes
Os02g0195566	Os02t0195566-00	2	-	5343023	5344207	1035	2	Annotated_lncRNA	ncRNA	0.5	2.23	2.15704	0.0345138	yes
MSTRG.4496	MSTRG.4496.2	2	+	5527583	5528679	835	4	Novel_lncRNA	Sense LncRNAs	0.97	0.36	-1.42999	1.28798e-05	yes
MSTRG.4504	MSTRG.4504.1	2	+	5584000	5585038	1039	1	Novel_lncRNA	Intergenic LncRNAs	1.75	0.8	-1.12928	5.38146e-10	yes
Os02g0199950	Os02t0199950-00	2	+	5595821	5600781	1219	10	Annotated_lncRNA	ncRNA	1.69	0.44	-1.94145	0.0147303	yes
Os02g0201401	Os02t0201401-00	2	-	5663606	5664832	392	2	Annotated_lncRNA	ncRNA	4.36	0.13	-5.06774	0.00196482	yes
MSTRG.4537	MSTRG.4537.1	2	+	5910515	5912009	387	2	Novel_lncRNA	Sense LncRNAs	2.62	3.63	0.470403	0.257587
Os02g0207300	Os02t0207300-01	2	+	6014063	6016083	979	2	Annotated_lncRNA	ncRNA	4.64	4.32	-0.103093	0.00398079
Os02g0209201	Os02t0209201-00	2	+	6140081	6141335	510	3	Annotated_lncRNA	ncRNA	1918.5	2906.35	0.59923	0.0509268
Os02g0211150	Os02t0211150-00	2	+	6207760	6213687	495	2	Annotated_lncRNA	ncRNA	6.65	0.62	-3.42301	0.098085
Os02g0211500	Os02t0211500-01	2	+	6226876	6228372	1497	1	Annotated_lncRNA	ncRNA	3.09	1.05	-1.55722	0.0839314
MSTRG.4591	MSTRG.4591.2	2	-	6529761	6532965	2155	4	Novel_lncRNA	Sense LncRNAs	1.53	0.18	-3.08746	5.24637e-37	yes
MSTRG.4591	MSTRG.4591.4	2	-	6529761	6532965	2083	5	Novel_lncRNA	Sense LncRNAs	2.7	0	-11.3987	2.64609e-64	yes
MSTRG.4591	MSTRG.4591.3	2	-	6529761	6532965	1542	4	Novel_lncRNA	Sense LncRNAs	3.71	0.83	-2.16024	5.2407e-48	yes
Os02g0217666	Os02t0217666-00	2	+	6573267	6575712	561	3	Annotated_lncRNA	ncRNA	5.36	5.23	-0.0354221	0.0957942
Os02g0217850	Os02t0217850-00	2	-	6582336	6587253	2174	12	Annotated_lncRNA	ncRNA	9.54	8.59	-0.151331	0.0488559
Os02g0218300	Os02t0218300-01	2	+	6608071	6610614	1277	3	Annotated_lncRNA	ncRNA	1.48	0.04	-5.20945	0.0848232
Os02g0220450	Os02t0220450-00	2	-	6713133	6716613	523	2	Annotated_lncRNA	ncRNA	1.47	0.53	-1.47175	0.0442846	yes
Os02g0221400	Os02t0221400-01	2	-	6770989	6779383	967	2	Annotated_lncRNA	ncRNA	2.05	2.23	0.12142	0.0698901
MSTRG.4633	MSTRG.4633.1	2	-	6993933	6994537	605	1	Novel_lncRNA	Others(sense updown),Others(anti down)	1.5	0.13	-3.52838	2.8108e-11	yes
Os02g0224850	Os02t0224850-00	2	-	7006167	7010202	1095	8	Annotated_lncRNA	ncRNA	12.37	4.58	-1.43343	0.0305566	yes
MSTRG.4638	MSTRG.4638.1	2	-	7012512	7017442	3902	2	Novel_lncRNA	Sense LncRNAs	5.01	0.37	-3.75921	2.23848e-231	yes
Os02g0230250	Os02t0230250-00	2	+	7323913	7325155	833	3	Annotated_lncRNA	ncRNA	0.63	2.2	1.80408	0.0402294	yes
MSTRG.4686	MSTRG.4686.1	2	-	7646206	7655639	6161	3	Novel_lncRNA	Antisense LncRNAs	2.22	0.33	-2.75002	5.90696e-134	yes
Os02g0235050	Os02t0235050-00	2	+	7650617	7650977	361	1	Annotated_lncRNA	ncRNA	4.97	1.21	-2.03824	0.0033658	yes
Os02g0236401	Os02t0236401-00	2	+	7719811	7722344	930	7	Annotated_lncRNA	ncRNA	3.38	0.38	-3.15295	0.095935
MSTRG.4701	MSTRG.4701.1	2	-	7972449	7972801	353	1	Novel_lncRNA	Intergenic LncRNAs	2.67	0	-11.3826	5.58006e-11	yes
Os02g0244650	Os02t0244650-00	2	-	8165926	8169030	927	6	Annotated_lncRNA	ncRNA	1.54	1.6	0.0551416	0.0013635
Os02g0250700	Os02t0250700-01	2	+	8518506	8535685	3470	6	Annotated_lncRNA	ncRNA	1.28	5.89	2.20212	0.00158931	yes
MSTRG.4733	MSTRG.4733.2	2	+	8518520	8535685	7605	6	Novel_lncRNA	Sense LncRNAs	8.3	1.42	-2.54722	0	yes
Os02g0251200	Os02t0251200-01	2	+	8528062	8529234	1173	1	Annotated_lncRNA	ncRNA	6.94	0	-12.7607	0.0169069	yes
Os02g0257400	Os02t0257400-01	2	+	8876190	8876441	252	1	Annotated_lncRNA	ncRNA	54.82	62.92	0.198816	0.0809954
Os02g0260000	Os02t0260000-01	2	+	9026460	9026900	441	1	Annotated_lncRNA	ncRNA	18.22	7.62	-1.25766	0.00494801	yes
Os02g0273050	Os02t0273050-00	2	+	9929008	9936733	1640	14	Annotated_lncRNA	ncRNA	3.32	0.33	-3.33065	0.035031	yes
Os02g0273501	Os02t0273501-00	2	-	9973072	9976395	1097	9	Annotated_lncRNA	ncRNA	2.51	0.88	-1.51211	0.0948588
Os02g0287950	Os02t0287950-00	2	+	10858501	10859032	532	1	Annotated_lncRNA	ncRNA	3.4	0	-11.7313	0.00398079	yes
MSTRG.4880	MSTRG.4880.1	2	+	11545577	11545907	331	1	Novel_lncRNA	Intergenic LncRNAs	0.1	0.95	3.24793	0.130777
Os02g0306600	Os02t0306600-01	2	-	12009034	12009419	386	1	Annotated_lncRNA	ncRNA	309.71	385.19	0.314652	0.0538486
Os02g0314400	Os02t0314400-01	2	+	12450783	12453989	1981	7	Annotated_lncRNA	ncRNA	0.22	7.63	5.11611	0.00209633	yes
Os02g0322500	Os02t0322500-01	2	+	12903043	12905272	1098	2	Annotated_lncRNA	ncRNA	13.69	14.86	0.118312	0.00778733
MSTRG.4953	MSTRG.4953.1	2	+	12903043	12905272	1005	3	Novel_lncRNA	Sense LncRNAs	0.74	0	-9.53138	6.57177e-09	yes
MSTRG.4974	MSTRG.4974.1	2	-	13297564	13298028	465	1	Novel_lncRNA	Antisense LncRNAs	7.81	3.98	-0.972554	4.47418e-17
MSTRG.4975	MSTRG.4975.1	2	-	13298351	13298580	230	1	Novel_lncRNA	Antisense LncRNAs	2.96	4.19	0.501353	0.386521
MSTRG.4976	MSTRG.4976.1	2	+	13299185	13299476	292	1	Novel_lncRNA	Others(sense updown)	31.66	22.17	-0.514052	1.09613e-27
Os02g0330601	Os02t0330601-01	2	-	13471165	13471402	238	1	Annotated_lncRNA	ncRNA	1.77	0.52	-1.76717	0.00476464	yes
MSTRG.4993	MSTRG.4993.1	2	-	13855869	13859316	909	3	Novel_lncRNA	Sense LncRNAs	5.13	1.45	-1.82291	8.82005e-35	yes
MSTRG.4994	MSTRG.4994.1	2	+	13863865	13866022	1664	4	Novel_lncRNA	Sense LncRNAs	2.34	0.76	-1.62244	1.5266e-26	yes
MSTRG.4995	MSTRG.4995.1	2	+	13881338	13886069	4732	1	Novel_lncRNA	Intergenic LncRNAs	1.75	0.07	-4.64386	6.67407e-97	yes
MSTRG.4996	MSTRG.4996.1	2	+	13888317	13889575	1259	1	Novel_lncRNA	Intergenic LncRNAs	4.62	2.65	-0.8019	1.95789e-23
MSTRG.5012	MSTRG.5012.1	2	+	14169039	14171479	1650	3	Novel_lncRNA	Intergenic LncRNAs	4.33	3.71	-0.222948	1.23946e-15
MSTRG.5013	MSTRG.5013.1	2	-	14199237	14200338	1102	1	Novel_lncRNA	Intergenic LncRNAs	0.31	1.8	2.53766	0.000371531	yes
MSTRG.5014	MSTRG.5014.1	2	+	14245318	14245615	298	1	Novel_lncRNA	Intergenic LncRNAs	15.16	70.74	2.22226	4.18641e-25	yes
MSTRG.5016	MSTRG.5016.1	2	+	14247157	14261366	815	2	Novel_lncRNA	Antisense LncRNAs	1.87	19.47	3.38014	2.73959e-43	yes
MSTRG.5018	MSTRG.5018.1	2	+	14269954	14284054	1057	3	Novel_lncRNA	Others(sense updown)	1.58	3.6	1.18807	0.370121
MSTRG.5019	MSTRG.5019.1	2	+	14274241	14279556	5253	2	Novel_lncRNA	Intergenic LncRNAs	59.29	195.06	1.71806	3.39614e-205	yes
MSTRG.5020	MSTRG.5020.1	2	+	14284354	14289647	5294	1	Novel_lncRNA	Antisense LncRNAs	13.71	14.02	0.0322578	1.07873e-82
MSTRG.5021	MSTRG.5021.1	2	-	14288759	14289647	889	1	Novel_lncRNA	Intergenic LncRNAs	1923.28	2507.46	0.382658	4.98814e-134
Os02g0452000	Os02t0452000-01	2	+	14868939	14871305	2367	1	Annotated_lncRNA	ncRNA	169.74	35.22	-2.26886	0.00117823	yes
Os02g0452550	Os02t0452550-00	2	+	14942705	14961844	2288	19	Annotated_lncRNA	ncRNA	7.91	1.08	-2.87265	0.0364018	yes
Os02g0452601	Os02t0452601-00	2	-	14946950	14947603	654	1	Annotated_lncRNA	ncRNA	10.84	5.41	-1.00266	0.00212762	yes
MSTRG.5036	MSTRG.5036.1	2	-	14966252	14966461	210	1	Novel_lncRNA	Intergenic LncRNAs	0.77	9.29	3.59275	4.71665e-07	yes
MSTRG.5037	MSTRG.5037.1	2	+	14966724	14969156	716	3	Novel_lncRNA	Intergenic LncRNAs	1.81	1.17	-0.629481	1.71569e-05
Os02g0453000	Os02t0453000-01	2	+	14970159	14973551	1663	3	Annotated_lncRNA	ncRNA	18.64	0.73	-4.67436	0.00215953	yes
MSTRG.5038	MSTRG.5038.1	2	+	14970159	14973551	2600	4	Novel_lncRNA	Sense LncRNAs	2.56	0.48	-2.41504	1.77163e-60	yes
MSTRG.5038	MSTRG.5038.2	2	+	14970159	14973551	1755	6	Novel_lncRNA	Sense LncRNAs	3.34	0.16	-4.3837	2.63353e-69	yes
MSTRG.5039	MSTRG.5039.2	2	-	14978418	14982717	3887	3	Novel_lncRNA	Sense LncRNAs	1.32	0	-10.3663	1.05504e-58	yes
MSTRG.5039	MSTRG.5039.1	2	-	14978418	14982717	3981	2	Novel_lncRNA	Sense LncRNAs	3.45	0.47	-2.87586	2.38698e-140	yes
MSTRG.5071	MSTRG.5071.1	2	-	15725827	15726670	765	2	Novel_lncRNA	Sense LncRNAs	5.14	0.65	-2.98326	7.88685e-42	yes
Os02g0469250	Os02t0469250-00	2	+	15838995	15839740	746	1	Annotated_lncRNA	ncRNA	1.29	0.15	-3.10434	0.0181558	yes
MSTRG.5097	MSTRG.5097.1	2	+	16227873	16236912	2159	2	Novel_lncRNA	Intergenic LncRNAs	8.26	0.18	-5.52007	1.36352e-204	yes
MSTRG.5102	MSTRG.5102.1	2	-	16347717	16350263	1233	5	Novel_lncRNA	Sense LncRNAs	29.93	2.79	-3.42326	0	yes
Os02g0484900	Os02t0484900-01	2	-	16747801	16748325	525	1	Annotated_lncRNA	ncRNA	0.39	1.64	2.07215	0.0525612
MSTRG.5121	MSTRG.5121.1	2	+	16823059	16824254	1196	1	Novel_lncRNA	Intergenic LncRNAs	1.19	0.28	-2.08746	1.88113e-12	yes
Os02g0493200	Os02t0493200-01	2	-	17276127	17276767	641	1	Annotated_lncRNA	ncRNA	4.08	0	-11.9944	0.00359192	yes
MSTRG.5154	MSTRG.5154.1	2	-	17718578	17720440	440	3	Novel_lncRNA	Sense LncRNAs	4.03	1.41	-1.51508	9.89321e-12	yes
MSTRG.5156	MSTRG.5156.1	2	-	17786412	17787581	1170	1	Novel_lncRNA	Others(anti down)	3.41	1.26	-1.43635	6.54508e-25	yes
Os02g0508650	Os02t0508650-00	2	-	18176399	18176710	312	1	Annotated_lncRNA	ncRNA	3.74	0.39	-3.26149	0.00786496	yes
Os02g0512200	Os02t0512200-01	2	+	18379663	18380230	568	1	Annotated_lncRNA	ncRNA	1.79	0	-10.8057	0.0757952
MSTRG.5211	MSTRG.5211.1	2	-	18714691	18717287	2493	2	Novel_lncRNA	Antisense LncRNAs	2.54	0.08	-4.98868	5.25894e-74	yes
Os02g0518550	Os02t0518550-00	2	+	18841145	18841440	296	1	Annotated_lncRNA	ncRNA	52.7	27.6	-0.933135	0.0190678
Os02g0524550	Os02t0524550-00	2	+	19167977	19168266	290	1	Annotated_lncRNA	ncRNA	17.15	3.35	-2.35598	0.00111149	yes
MSTRG.5243	MSTRG.5243.2	2	+	19201983	19202532	550	1	Novel_lncRNA	Sense LncRNAs	0.12	1.38	3.52356	0.00538298	yes
MSTRG.5264	MSTRG.5264.1	2	+	19414763	19415074	272	2	Novel_lncRNA	Bidirectional LncRNAs	9.54	2.52	-1.92057	1.05944e-20	yes
MSTRG.5265	MSTRG.5265.1	2	-	19415437	19415636	200	1	Novel_lncRNA	Intergenic LncRNAs	0.16	0	-7.32193	1
Os02g0529450	Os02t0529450-00	2	-	19438426	19441745	1443	5	Annotated_lncRNA	ncRNA	2.04	14.48	2.82742	0.0128518	yes
MSTRG.5281	MSTRG.5281.1	2	-	19607620	19607874	255	1	Novel_lncRNA	Intergenic LncRNAs	0.64	0.1	-2.67807	0.0197304	yes
MSTRG.5335	MSTRG.5335.1	2	-	20305197	20306433	1237	1	Novel_lncRNA	Intergenic LncRNAs	1.57	0.33	-2.25023	3.35665e-17	yes
MSTRG.5337	MSTRG.5337.1	2	+	20451567	20455595	3192	4	Novel_lncRNA	Intergenic LncRNAs	5.18	1.33	-1.96153	8.33081e-125	yes
MSTRG.5337	MSTRG.5337.2	2	+	20451568	20454764	2069	5	Novel_lncRNA	Intergenic LncRNAs	3.65	0.74	-2.3023	4.28622e-66	yes
Os02g0552450	Os02t0552450-00	2	+	20832858	20835330	538	3	Annotated_lncRNA	ncRNA	2.41	9.66	2.00299	0.0741792
Os02g0553400	Os02t0553400-01	2	-	20877475	20878178	704	1	Annotated_lncRNA	ncRNA	1.57	1.08	-0.539733	0.00640368
MSTRG.5385	MSTRG.5385.1	2	+	21024076	21026071	1996	1	Novel_lncRNA	Intergenic LncRNAs	2.16	2.26	0.0652915	1.61476e-06
Os02g0557150	Os02t0557150-00	2	-	21084125	21088051	962	5	Annotated_lncRNA	ncRNA	2073.06	370.29	-2.48503	0.0191945	yes
Os02g0557250	Os02t0557250-00	2	-	21102291	21103546	1084	3	Annotated_lncRNA	ncRNA	3.32	6.87	1.04913	0.00523099	yes
Os02g0562350	Os02t0562350-00	2	-	21324192	21324772	581	1	Annotated_lncRNA	ncRNA	0.42	1.54	1.87447	0.0289205	yes
Os02g0564150	Os02t0564150-00	2	-	21414000	21414378	379	1	Annotated_lncRNA	ncRNA	3.8	2.84	-0.420108	0.0273549
MSTRG.5456	MSTRG.5456.1	2	-	21655894	21656332	439	1	Novel_lncRNA	Intergenic LncRNAs	1.77	1.21	-0.548742	0.00224672
MSTRG.5457	MSTRG.5457.1	2	-	21864338	21865288	951	1	Novel_lncRNA	Others(sense updown)	1.33	0.21	-2.66297	3.51482e-13	yes
Os02g0572500	Os02t0572500-00	2	+	21931068	21932526	616	3	Annotated_lncRNA	ncRNA	10.45	14.9	0.511809	0.00493022
MSTRG.5488	MSTRG.5488.1	2	-	22297868	22305314	2966	4	Novel_lncRNA	Antisense LncRNAs	5.66	4.08	-0.472233	2.38627e-46
MSTRG.5490	MSTRG.5490.1	2	+	22323065	22323384	320	1	Novel_lncRNA	Intergenic LncRNAs	2.02	0.84	-1.26589	0.000164816	yes
MSTRG.5491	MSTRG.5491.1	2	-	22323470	22323719	250	1	Novel_lncRNA	Intergenic LncRNAs	0.32	0	-8.32193	0.281469
Os02g0580366	Os02t0580366-00	2	-	22335324	22336980	750	4	Annotated_lncRNA	ncRNA	0.32	1.49	2.21917	0.024152	yes
Os02g0583900	Os02t0583900-01	2	-	22514865	22515484	620	1	Annotated_lncRNA	ncRNA	6.91	1.71	-2.01469	0.0234091	yes
MSTRG.5522	MSTRG.5522.1	2	+	22526062	22526844	783	1	Novel_lncRNA	Intergenic LncRNAs	2.24	0.55	-2.026	1.3358e-14	yes
MSTRG.5530	MSTRG.5530.1	2	-	22567218	22567481	264	1	Novel_lncRNA	Intergenic LncRNAs	564.92	2.3	-7.94027	0	yes
MSTRG.5531	MSTRG.5531.1	2	-	22593091	22593425	335	1	Novel_lncRNA	Intergenic LncRNAs	196.01	5.98	-5.03464	0	yes
Os02g0590850	Os02t0590850-00	2	+	22831661	22832116	456	1	Annotated_lncRNA	ncRNA	8.88	11.35	0.354061	0.000960652
Os02g0591850	Os02t0591850-01	2	+	22888409	22888823	415	1	Annotated_lncRNA	ncRNA	0.38	10.91	4.84351	0.0251922	yes
Os02g0597950	Os02t0597950-00	2	+	23241662	23244266	903	3	Annotated_lncRNA	ncRNA	2.05	1.65	-0.313158	0.0927048
Os02g0602700	Os02t0602700-01	2	+	23593919	23595886	1968	1	Annotated_lncRNA	ncRNA	1.24	0.64	-0.954196	0.00380933
MSTRG.5650	MSTRG.5650.1	2	-	23767891	23768957	1067	1	Novel_lncRNA	Sense LncRNAs	15.89	17.83	0.166188	2.07559e-17
MSTRG.5661	MSTRG.5661.1	2	+	23890981	23892922	569	2	Novel_lncRNA	Sense LncRNAs	17.16	5.93	-1.53295	4.56973e-62	yes
Os02g0609700	Os02t0609700-01	2	-	23929863	23931203	1341	1	Annotated_lncRNA	ncRNA	20.5	9.77	-1.06919	1.08041e-05	yes
MSTRG.5678	MSTRG.5678.2	2	-	24063258	24066318	718	4	Novel_lncRNA	Sense LncRNAs	5.2	5.46	0.0703893	9.8951e-06
Os02g0617900	Os02t0617900-01	2	+	24563189	24563451	263	1	Annotated_lncRNA	ncRNA	1.37	0.07	-4.29068	0.0786772
Os02g0618000	Os02t0618000-01	2	+	24564049	24564603	555	1	Annotated_lncRNA	ncRNA	0.57	2.9	2.34702	0.00167907	yes
Os02g0621350	Os02t0621350-00	2	+	24718810	24719020	211	1	Annotated_lncRNA	ncRNA	2.47	1.07	-1.2069	0.0158655	yes
Os02g0622150	Os02t0622150-00	2	-	24768804	24771258	1175	7	Annotated_lncRNA	ncRNA	20.53	29.7	0.532729	0.00666541
MSTRG.5745	MSTRG.5745.1	2	+	24838672	24839051	380	1	Novel_lncRNA	Intergenic LncRNAs	403.32	569.77	0.498455	2.29211e-36
Os02g0623550	Os02t0623550-00	2	+	24858109	24859923	441	3	Annotated_lncRNA	ncRNA	15.17	9.68	-0.648142	0.0542712
Os02g0626200	Os02t0626200-01	2	-	24976369	24976837	469	1	Annotated_lncRNA	ncRNA	4.56	3.92	-0.21818	0.00128379
Os02g0633600	Os02t0633600-01	2	+	25410428	25410891	369	2	Annotated_lncRNA	ncRNA	33.21	56.31	0.761773	0.025169
MSTRG.5840	MSTRG.5840.1	2	-	25816450	25816728	279	1	Novel_lncRNA	Others(anti down)	5.23	0.09	-5.86074	3.35665e-17	yes
Os02g0644650	Os02t0644650-00	2	+	25944665	25945078	414	1	Annotated_lncRNA	ncRNA	23.83	8.52	-1.48385	0.0253965	yes
Os02g0648000	Os02t0648000-01	2	+	26080567	26082244	1678	1	Annotated_lncRNA	ncRNA	19.69	35.35	0.844247	0.0582064
Os02g0648200	Os02t0648200-00	2	+	26091070	26091651	463	2	Annotated_lncRNA	ncRNA	2.26	2.27	0.00636952	0.0497528
Os02g0649000	Os02t0649000-01	2	+	26131342	26132296	955	1	Annotated_lncRNA	ncRNA	0.11	9.11	6.37188	0.0391908	yes
MSTRG.5888	MSTRG.5888.1	2	-	26336895	26337204	310	1	Novel_lncRNA	Antisense LncRNAs	0.73	0	-9.51175	0.00514524	yes
MSTRG.5889	MSTRG.5889.1	2	-	26337491	26337758	268	1	Novel_lncRNA	Antisense LncRNAs	1.82	0.09	-4.33787	2.99997e-06	yes
Os02g0653000	Os02t0653000-01	2	+	26337576	26337979	404	1	Annotated_lncRNA	ncRNA	2.22	2.06	-0.107915	9.99212e-08
MSTRG.5892	MSTRG.5892.1	2	+	26348652	26350040	1389	1	Novel_lncRNA	Antisense LncRNAs	6.51	1	-2.70266	2.74074e-89	yes
Os02g0655401	Os02t0655401-00	2	-	26466817	26467222	406	1	Annotated_lncRNA	ncRNA	3.27	2.13	-0.618437	0.0968173
Os02g0668700	Os02t0668700-00	2	+	27148056	27149208	797	2	Annotated_lncRNA	ncRNA	0	9.28	13.1799	0.0805476
MSTRG.6004	MSTRG.6004.1	2	+	27369142	27371727	572	2	Novel_lncRNA	Sense LncRNAs	1.63	3.19	0.968684	1
MSTRG.6053	MSTRG.6053.2	2	-	28015522	28020849	551	2	Novel_lncRNA	Sense LncRNAs	6.01	1.22	-2.30048	6.49311e-30	yes
Os02g0686450	Os02t0686450-00	2	-	28114005	28118374	1500	10	Annotated_lncRNA	ncRNA	1.86	2.26	0.28102	0.0443504
MSTRG.6089	MSTRG.6089.1	2	+	28384154	28384454	301	1	Novel_lncRNA	Intergenic LncRNAs	0.28	0	-8.12928	0.148171
MSTRG.6101	MSTRG.6101.1	2	+	28523501	28530172	3203	7	Novel_lncRNA	Sense LncRNAs	18.73	1.6	-3.54921	0	yes
Os02g0700350	Os02t0700350-00	2	-	28811253	28811918	666	1	Annotated_lncRNA	ncRNA	4.05	5.92	0.547675	0.0552425
Os02g0702633	Os02t0702633-00	2	+	28955179	28957479	365	2	Annotated_lncRNA	ncRNA	2.77	2.84	0.036005	0.0104517
Os02g0705550	Os02t0705550-01	2	+	29118773	29120637	1865	1	Annotated_lncRNA	ncRNA	5.7	0	-12.4767	0.0973346
Os02g0716600	Os02t0716600-01	2	-	29729407	29730106	700	1	Annotated_lncRNA	ncRNA	66.29	52.37	-0.340051	8.24442e-05
Os02g0717650	Os02t0717650-00	2	+	29786725	29787716	795	3	Annotated_lncRNA	ncRNA	2.22	3.56	0.681318	0.0401155
Os02g0718100	Os02t0718100-01	2	-	29804949	29805545	597	1	Annotated_lncRNA	ncRNA	9.44	3.88	-1.28273	0.00209886	yes
Os02g0720250	Os02t0720250-00	2	-	29878316	29880217	1480	2	Annotated_lncRNA	ncRNA	8.82	7.24	-0.284789	0.0975437
Os02g0722650	Os02t0722650-00	2	+	30008280	30008810	531	1	Annotated_lncRNA	ncRNA	8.42	0	-13.0396	0.00494801	yes
Os02g0724300	Os02t0724300-01	2	-	30102045	30102837	793	1	Annotated_lncRNA	ncRNA	5.16	0	-12.3332	0.0513216
Os02g0726833	Os02t0726833-01	2	+	30234297	30235911	1615	1	Annotated_lncRNA	ncRNA	2.88	0.27	-3.41504	0.0128619	yes
Os02g0728850	Os02t0728850-00	2	-	30337274	30338879	405	3	Annotated_lncRNA	ncRNA	35.77	1.51	-4.56613	0.0158655	yes
Os02g0730350	Os02t0730350-00	2	-	30421318	30422086	769	1	Annotated_lncRNA	ncRNA	11.76	0.72	-4.02975	0.0509465
Os02g0731300	Os02t0731300-01	2	-	30459392	30464135	1845	3	Annotated_lncRNA	ncRNA	6.88	1.19	-2.53145	4.51338e-08	yes
MSTRG.6343	MSTRG.6343.6	2	-	30459493	30464135	1822	4	Novel_lncRNA	Antisense LncRNAs	10.73	0	-13.3894	1.97518e-221	yes
MSTRG.6343	MSTRG.6343.3	2	-	30459493	30464135	4553	2	Novel_lncRNA	Antisense LncRNAs	23.05	0.27	-6.41566	0	yes
MSTRG.6343	MSTRG.6343.2	2	-	30459493	30464135	4027	2	Novel_lncRNA	Antisense LncRNAs	29.11	0.03	-9.92234	0	yes
MSTRG.6360	MSTRG.6360.1	2	-	30570328	30570835	508	1	Novel_lncRNA	Others(anti down)	1.34	1	-0.422233	0.00571373
Os02g0740001	Os02t0740001-00	2	+	30931119	30933688	1404	4	Annotated_lncRNA	ncRNA	6.17	2.2	-1.48777	0.0209069	yes
MSTRG.6442	MSTRG.6442.1	2	+	31290670	31299077	855	2	Novel_lncRNA	Sense LncRNAs	6.83	5.32	-0.360459	2.40438e-15
Os02g0750200	Os02t0750200-01	2	+	31527788	31528529	742	1	Annotated_lncRNA	ncRNA	1.65	0	-10.6883	0.0802093
Os02g0753850	Os02t0753850-00	2	-	31705279	31706797	912	4	Annotated_lncRNA	ncRNA	1.01	0.28	-1.85086	0.0068786	yes
MSTRG.6502	MSTRG.6502.1	2	+	31798714	31800951	2238	1	Novel_lncRNA	Antisense LncRNAs	3	1.12	-1.42146	1.39452e-40	yes
MSTRG.6564	MSTRG.6564.2	2	-	32353428	32356451	2526	3	Novel_lncRNA	Sense LncRNAs	3.32	1.08	-1.62015	8.04118e-56	yes
Os02g0771900	Os02t0771900-00	2	+	32577692	32578623	669	2	Annotated_lncRNA	ncRNA	45.18	173.71	1.94292	0.0526934
Os02g0777001	Os02t0777001-00	2	-	32855323	32856116	788	2	Annotated_lncRNA	ncRNA	28.23	2.87	-3.29811	0.0143681	yes
Os02g0777950	Os02t0777950-01	2	+	32932386	32932924	539	1	Annotated_lncRNA	ncRNA	5.57	14.81	1.41082	0.00889816	yes
Os02g0778666	Os02t0778666-00	2	-	32965751	32968749	1213	2	Annotated_lncRNA	ncRNA	2.85	0	-11.4767	0.0945397
Os02g0781350	Os02t0781350-00	2	+	33112967	33113582	616	1	Annotated_lncRNA	ncRNA	6.63	4.43	-0.581702	0.0796379
Os02g0784801	Os02t0784801-00	2	+	33315713	33316650	600	4	Annotated_lncRNA	ncRNA	2.59	2.61	0.0110977	0.0191358
MSTRG.6692	MSTRG.6692.2	2	+	33641287	33645036	2918	3	Novel_lncRNA	Intergenic LncRNAs	0.67	0	-9.38802	7.54336e-23	yes
MSTRG.6692	MSTRG.6692.1	2	+	33641287	33645036	3566	3	Novel_lncRNA	Intergenic LncRNAs	5.81	0.46	-3.65883	1.4096e-245	yes
MSTRG.6692	MSTRG.6692.3	2	+	33643648	33645036	1206	3	Novel_lncRNA	Intergenic LncRNAs	1.09	0.36	-1.59826	1.81631e-09	yes
MSTRG.6706	MSTRG.6706.1	2	-	33734437	33737329	804	3	Novel_lncRNA	Sense LncRNAs	5.04	1.76	-1.51785	1.81322e-26	yes
Os02g0796750	Os02t0796750-00	2	+	33889645	33889855	211	1	Annotated_lncRNA	ncRNA	4.27	2.87	-0.573185	0.0355185
Os02g0802650	Os02t0802650-01	2	+	34219634	34220329	696	1	Annotated_lncRNA	ncRNA	10.36	5.43	-0.932	0.0126831
MSTRG.6782	MSTRG.6782.1	2	+	34325206	34327789	1343	2	Novel_lncRNA	Sense LncRNAs	2.25	0.98	-1.19907	6.23346e-17	yes
Os02g0804933	Os02t0804933-01	2	-	34328237	34333069	2851	17	Annotated_lncRNA	ncRNA	5.49	1.65	-1.73434	0.0426355	yes
MSTRG.6802	MSTRG.6802.3	2	+	34482713	34483848	700	4	Novel_lncRNA	Antisense LncRNAs	0.56	0.04	-3.80735	4.49439e-05	yes
Os02g0810425	Os02t0810425-00	2	-	34645171	34649125	2508	12	Annotated_lncRNA	ncRNA	3.56	2.25	-0.661952	0.0240928
Os02g0816350	Os02t0816350-00	2	-	34987593	34988604	931	2	Annotated_lncRNA	ncRNA	4.78	5.34	0.159829	0.048478
Os02g0817850	Os02t0817850-00	2	+	35086387	35089674	1971	8	Annotated_lncRNA	ncRNA	1.71	0.54	-1.66297	0.0119176	yes
Os02g0819650	Os02t0819650-00	2	+	35190871	35191449	579	1	Annotated_lncRNA	ncRNA	5.44	0.89	-2.61173	0.03648	yes
Os02g0821850	Os02t0821850-00	2	-	35272733	35274717	535	3	Annotated_lncRNA	ncRNA	7	9.72	0.473601	0.0352094
MSTRG.6934	MSTRG.6934.1	2	-	35436261	35436628	368	1	Novel_lncRNA	Others(sense updown)	0.71	2.07	1.54374	0.331639
Os02g0825550	Os02t0825550-00	2	-	35448228	35449814	1482	2	Annotated_lncRNA	ncRNA	4.67	4.36	-0.0990944	0.0162375
MSTRG.6939	MSTRG.6939.1	2	+	35458970	35459234	265	1	Novel_lncRNA	Intronic LncRNAs	1.35	0.1	-3.75489	8.86454e-05	yes
MSTRG.6962	MSTRG.6962.1	2	-	35633824	35636778	2955	1	Novel_lncRNA	Sense LncRNAs	17.97	1.83	-3.29567	0	yes
Os02g0833950	Os02t0833950-00	2	-	35875403	35875680	278	1	Annotated_lncRNA	ncRNA	6.15	19.86	1.69121	0.00536373	yes
Os02g0834050	Os02t0834050-00	2	-	35888179	35888743	565	1	Annotated_lncRNA	ncRNA	16.66	2.22	-2.90776	0.00180858	yes
MSTRG.7013	MSTRG.7013.1	2	-	35932551	35933008	458	1	Novel_lncRNA	Intergenic LncRNAs	1.84	0.55	-1.7422	5.5298e-07	yes
MSTRG.7044	MSTRG.7044.1	3	+	182695	186237	3543	1	Novel_lncRNA	Sense LncRNAs	2.06	0.71	-1.53675	2.06646e-46	yes
MSTRG.7051	MSTRG.7051.1	3	-	220264	220535	272	1	Novel_lncRNA	Antisense LncRNAs	3.34	0.19	-4.13578	5.58006e-11	yes
Os03g0103700	Os03t0103700-02	3	+	263054	264452	1313	2	Annotated_lncRNA	ncRNA	3.47	3.56	0.0369416	0.050307
Os03g0106100	Os03t0106100-01	3	+	360500	366714	2452	3	Annotated_lncRNA	ncRNA	2.81	3.4	0.274965	0.0354613
Os03g0106250	Os03t0106250-00	3	+	362194	363303	1110	1	Annotated_lncRNA	ncRNA	6.45	0.69	-3.22463	0.0331007	yes
Os03g0108932	Os03t0108932-00	3	-	511890	514744	913	6	Annotated_lncRNA	ncRNA	0.66	0.12	-2.45943	0.0588125
Os03g0114700	Os03t0114700-01	3	-	837760	841532	827	3	Annotated_lncRNA	ncRNA	64.13	11.31	-2.5034	0.015854	yes
Os03g0114850	Os03t0114850-00	3	-	845255	845921	504	3	Annotated_lncRNA	ncRNA	1.81	1.91	0.0775829	0.089917
Os03g0118500	Os03t0118500-01	3	-	1004320	1007975	1198	2	Annotated_lncRNA	ncRNA	20.97	106.24	2.34093	0.0750389
MSTRG.7176	MSTRG.7176.1	3	-	1080891	1081263	373	1	Novel_lncRNA	Antisense LncRNAs	0	1.15	10.1674	0.00454258	yes
Os03g0120425	Os03t0120425-00	3	+	1125324	1126855	1048	3	Annotated_lncRNA	ncRNA	4.94	0.37	-3.73891	0.00843889	yes
Os03g0122500	Os03t0122500-01	3	+	1270230	1271217	711	3	Annotated_lncRNA	ncRNA	5.93	12.43	1.06772	0.0325857	yes
MSTRG.7196	MSTRG.7196.2	3	+	1270230	1290513	2413	4	Novel_lncRNA	Antisense LncRNAs	2.8	0.03	-6.54432	7.88181e-78	yes
Os03g0124800	Os03t0124800-01	3	+	1427658	1428168	511	1	Annotated_lncRNA	ncRNA	3.28	3.67	0.162084	0.0781781
Os03g0127650	Os03t0127650-00	3	+	1554300	1555677	1277	2	Annotated_lncRNA	ncRNA	36.74	17.7	-1.0536	0.00348317	yes
Os03g0127800	Os03t0127800-00	3	-	1566296	1566638	343	1	Annotated_lncRNA	ncRNA	9.57	0.74	-3.69292	0.0239639	yes
MSTRG.7253	MSTRG.7253.1	3	+	1689152	1689502	351	1	Novel_lncRNA	Antisense LncRNAs	0.83	1.37	0.722993	0.882404
Os03g0131450	Os03t0131450-00	3	+	1799216	1803691	1488	9	Annotated_lncRNA	ncRNA	3.18	4.33	0.44534	0.0856884
Os03g0136975	Os03t0136975-00	3	+	2027864	2028771	571	3	Annotated_lncRNA	ncRNA	1.19	0.12	-3.30986	0.0682764
Os03g0137050	Os03t0137050-00	3	-	2055495	2056386	639	2	Annotated_lncRNA	ncRNA	3.59	0.27	-3.73295	0.00878177	yes
Os03g0137350	Os03t0137350-00	3	+	2059823	2062999	829	3	Annotated_lncRNA	ncRNA	12.08	0	-13.5603	0.00416368	yes
MSTRG.7334	MSTRG.7334.1	3	-	2144099	2144349	251	1	Novel_lncRNA	Intronic LncRNAs	0	0.3	8.22882	0.539658
MSTRG.7332	MSTRG.7332.3	3	+	2144101	2145398	906	3	Novel_lncRNA	Sense LncRNAs	12.93	22.91	0.825255	0.349309
MSTRG.7349	MSTRG.7349.1	3	+	2304945	2305186	242	1	Novel_lncRNA	Others(sense updown)	0.23	0	-7.84549	0.539658
MSTRG.7348	MSTRG.7348.1	3	-	2304945	2305189	245	1	Novel_lncRNA	Bidirectional LncRNAs	63.9	28.08	-1.18627	1.36424e-79	yes
Os03g0144200	Os03t0144200-01	3	+	2460733	2462179	1447	1	Annotated_lncRNA	ncRNA	4.74	3.54	-0.421138	0.000839273
Os03g0146800	Os03t0146800-01	3	+	2609009	2609572	564	1	Annotated_lncRNA	ncRNA	14.17	3.3	-2.1023	0.0430678	yes
Os03g0152200	Os03t0152200-00	3	-	2872974	2875186	554	3	Annotated_lncRNA	ncRNA	2.8	0.46	-2.60572	0.0434193	yes
MSTRG.7424	MSTRG.7424.1	3	-	2996844	2997344	465	2	Novel_lncRNA	Intergenic LncRNAs	1.4	0.65	-1.10692	0.000281164	yes
Os03g0155400	Os03t0155400-00	3	-	2999161	2999885	637	2	Annotated_lncRNA	ncRNA	2.76	0	-11.4305	0.0443421	yes
Os03g0160502	Os03t0160502-00	3	+	3216178	3216835	571	2	Annotated_lncRNA	ncRNA	8.87	2.02	-2.13458	0.0631531
MSTRG.7484	MSTRG.7484.1	3	+	3487408	3497297	9005	2	Novel_lncRNA	Antisense LncRNAs	2.54	0.09	-4.81876	8.11885e-263	yes
MSTRG.7526	MSTRG.7526.2	3	-	3760652	3762293	1504	2	Novel_lncRNA	Sense LncRNAs	2.12	0.08	-4.72792	1.10064e-37	yes
Os03g0171950	Os03t0171950-00	3	-	3855141	3857362	948	5	Annotated_lncRNA	ncRNA	17.22	7.71	-1.15928	0.0920749
Os03g0178600	Os03t0178600-01	3	-	4144020	4144383	364	1	Annotated_lncRNA	ncRNA	14.66	55.13	1.91095	0.00335978	yes
Os03g0187200	Os03t0187200-01	3	+	4559624	4559829	206	1	Annotated_lncRNA	ncRNA	2.8	2.73	-0.0365259	0.00569231
MSTRG.7644	MSTRG.7644.1	3	+	4701228	4701575	348	1	Novel_lncRNA	Others(anti down),Others(sense updown),Others(sense updown)	42.23	54.24	0.361089	1.51927e-09
Os03g0195350	Os03t0195350-00	3	+	4946751	4950744	1847	9	Annotated_lncRNA	ncRNA	25.26	7.65	-1.72332	0.00457402	yes
MSTRG.7688	MSTRG.7688.1	3	-	5009788	5010014	227	1	Novel_lncRNA	Intergenic LncRNAs	0.29	0.11	-1.39855	0.281469
MSTRG.7687	MSTRG.7687.1	3	+	5009788	5010014	227	1	Novel_lncRNA	Intergenic LncRNAs	0.57	0.22	-1.37346	0.148171
Os03g0197050	Os03t0197050-00	3	-	5088416	5089103	688	1	Annotated_lncRNA	ncRNA	21.2	13.66	-0.634107	4.00965e-05
Os03g0198433	Os03t0198433-00	3	-	5167339	5170273	1386	9	Annotated_lncRNA	ncRNA	7.13	0.87	-3.03481	0.00756777	yes
MSTRG.7716	MSTRG.7716.1	3	-	5272399	5272730	332	1	Novel_lncRNA	Others(anti down)	2.74	2.75	0.00525573	0.0284185
MSTRG.7734	MSTRG.7734.1	3	+	5360038	5360338	301	1	Novel_lncRNA	Intergenic LncRNAs	4.51	1.42	-1.66724	6.08628e-10	yes
MSTRG.7846	MSTRG.7846.1	3	+	6338502	6339528	1027	1	Novel_lncRNA	Intergenic LncRNAs	3	2.52	-0.251539	1.11773e-07
Os03g0221150	Os03t0221150-01	3	+	6353265	6353484	220	1	Annotated_lncRNA	ncRNA	0.78	0	-9.60733	0.0357456	yes
Os03g0222401	Os03t0222401-00	3	-	6403950	6404477	528	1	Annotated_lncRNA	ncRNA	0.64	0.82	0.357552	0.0341747
Os03g0223550	Os03t0223550-00	3	+	6466218	6466493	276	1	Annotated_lncRNA	ncRNA	4.41	0.42	-3.39232	0.0681836
Os03g0232250	Os03t0232250-00	3	+	6996027	6996317	291	1	Annotated_lncRNA	ncRNA	4.24	14.47	1.77093	0.0158655	yes
MSTRG.7915	MSTRG.7915.1	3	+	7102180	7104706	653	4	Novel_lncRNA	Antisense LncRNAs	0.5	1.59	1.66903	0.203752
Os03g0234350	Os03t0234350-00	3	+	7102655	7104625	376	3	Annotated_lncRNA	ncRNA	34.07	7.34	-2.21465	0.00838746	yes
MSTRG.7918	MSTRG.7918.1	3	+	7123510	7124000	491	1	Novel_lncRNA	Others(anti down)	13.62	14.75	0.114988	1.22456e-08
Os03g0242350	Os03t0242350-01	3	+	7520304	7521305	1002	1	Annotated_lncRNA	ncRNA	0.99	0.16	-2.62936	0.00800955	yes
Os03g0254250	Os03t0254250-00	3	+	8134007	8134226	220	1	Annotated_lncRNA	ncRNA	1.12	0.03	-5.22239	0.0737704
MSTRG.8038	MSTRG.8038.1	3	-	8250165	8253416	2970	2	Novel_lncRNA	Intergenic LncRNAs	2.8	1.17	-1.25892	2.14559e-45	yes
Os03g0263950	Os03t0263950-00	3	-	8679830	8680692	515	2	Annotated_lncRNA	ncRNA	1.03	1.3	0.335867	0.0884869
Os03g0268050	Os03t0268050-00	3	-	8887334	8889515	703	3	Annotated_lncRNA	ncRNA	130.98	228.24	0.801205	0.0121012
Os03g0269950	Os03t0269950-01	3	-	9015107	9015929	823	1	Annotated_lncRNA	ncRNA	19.78	0	-14.2718	0.00446744	yes
Os03g0278066	Os03t0278066-00	3	-	9438764	9440299	774	6	Annotated_lncRNA	ncRNA	2.33	0.66	-1.81979	0.0694012
Os03g0279801	Os03t0279801-01	3	-	9542963	9547420	4458	1	Annotated_lncRNA	ncRNA	0.91	1.64	0.849757	0.0315795
Os03g0284200	Os03t0284200-01	3	-	9764932	9765922	991	1	Annotated_lncRNA	ncRNA	0.87	0.06	-3.85798	0.036723	yes
Os03g0285850	Os03t0285850-00	3	+	9849591	9850194	370	2	Annotated_lncRNA	ncRNA	47.46	14.83	-1.67819	0.0831947
MSTRG.8243	MSTRG.8243.3	3	+	9961524	9964435	2912	1	Novel_lncRNA	Sense LncRNAs	3.43	0.51	-2.74964	6.18116e-99	yes
Os03g0289133	Os03t0289133-00	3	-	10008135	10011536	1505	8	Annotated_lncRNA	ncRNA	1.04	0.89	-0.224706	0.00536498
Os03g0294001	Os03t0294001-01	3	+	10244601	10245815	1215	1	Annotated_lncRNA	ncRNA	8.31	2.15	-1.95051	0.00349809	yes
Os03g0298501	Os03t0298501-00	3	-	10462470	10466136	1608	6	Annotated_lncRNA	ncRNA	0.41	1.78	2.11818	0.0928819
Os03g0298850	Os03t0298850-00	3	+	10478626	10482567	752	5	Annotated_lncRNA	ncRNA	6.44	4.46	-0.530017	0.0214317
MSTRG.8320	MSTRG.8320.1	3	-	10549109	10549534	426	1	Novel_lncRNA	Antisense LncRNAs	12.11	6.6	-0.875661	3.65775e-22
Os03g0302100	Os03t0302100-01	3	+	10649612	10650366	755	1	Annotated_lncRNA	ncRNA	44.03	19.38	-1.18392	0.00638262	yes
MSTRG.8358	MSTRG.8358.1	3	+	10900227	10900570	344	1	Novel_lncRNA	Intergenic LncRNAs	100.72	22.91	-2.1363	9.04323e-270	yes
MSTRG.8359	MSTRG.8359.1	3	+	10901102	10901485	384	1	Novel_lncRNA	Intergenic LncRNAs	50.02	19.47	-1.36125	7.5693e-108	yes
MSTRG.8360	MSTRG.8360.1	3	-	10901158	10902158	1001	1	Novel_lncRNA	Intergenic LncRNAs	8.19	3.22	-1.3468	5.34514e-47	yes
MSTRG.8361	MSTRG.8361.1	3	+	10901828	10902145	318	1	Novel_lncRNA	Intergenic LncRNAs	39.76	12.6	-1.65789	3.41698e-84	yes
MSTRG.8363	MSTRG.8363.1	3	-	10910674	10911173	500	1	Novel_lncRNA	Antisense LncRNAs	2.47	0.96	-1.3634	3.20556e-08	yes
Os03g0307850	Os03t0307850-00	3	+	10952446	10955538	1206	8	Annotated_lncRNA	ncRNA	3.03	1.6	-0.921246	0.0290947
MSTRG.8388	MSTRG.8388.1	3	-	11083380	11086842	3463	1	Novel_lncRNA	Sense LncRNAs	1.93	1.31	-0.559034	1.63752e-21
Os03g0310633	Os03t0310633-00	3	-	11086139	11086842	651	2	Annotated_lncRNA	ncRNA	3.82	12.81	1.74563	0.0422004	yes
Os03g0315000	Os03t0315000-00	3	+	11283778	11287355	1327	6	Annotated_lncRNA	ncRNA	2.85	0.23	-3.63126	0.0788229
Os03g0318550	Os03t0318550-00	3	+	11469913	11475690	2663	10	Annotated_lncRNA	ncRNA	3.99	4.3	0.107948	0.0257778
MSTRG.8449	MSTRG.8449.1	3	+	11749198	11768641	289	2	Novel_lncRNA	Others(sense updown)	3.49	4.21	0.270593	0.102448
Os03g0323950	Os03t0323950-00	3	-	11753066	11753824	759	1	Annotated_lncRNA	ncRNA	0.09	1.84	4.35364	0.0418944	yes
Os03g0324650	Os03t0324650-00	3	+	11798313	11801222	2358	2	Annotated_lncRNA	ncRNA	4.55	4.96	0.124474	0.0912739
Os03g0328450	Os03t0328450-00	3	+	12022057	12023623	615	4	Annotated_lncRNA	ncRNA	4.75	4.03	-0.237148	0.00280656
Os03g0332600	Os03t0332600-01	3	-	12276271	12276620	350	1	Annotated_lncRNA	ncRNA	8.42	7.03	-0.260296	0.0181639
MSTRG.8506	MSTRG.8506.1	3	-	12366074	12367524	1451	1	Novel_lncRNA	Intergenic LncRNAs	7	8.23	0.233538	1.3928e-09
Os03g0337850	Os03t0337850-00	3	+	12542416	12543105	366	3	Annotated_lncRNA	ncRNA	6.96	15.63	1.16716	0.0633575
Os03g0341150	Os03t0341150-00	3	+	12716070	12718241	643	4	Annotated_lncRNA	ncRNA	7.6	20.48	1.43014	0.0827068
MSTRG.8551	MSTRG.8551.2	3	+	12758030	12759518	1143	2	Novel_lncRNA	Sense LncRNAs	1.61	1.06	-0.602996	5.00281e-07
Os03g0345500	Os03t0345500-00	3	+	12871757	12873392	885	2	Annotated_lncRNA	ncRNA	0.38	1.69	2.15295	1.13489e-05	yes
Os03g0347400	Os03t0347400-00	3	+	13000031	13001869	531	4	Annotated_lncRNA	ncRNA	1.37	3.71	1.43724	0.0404965	yes
MSTRG.8625	MSTRG.8625.1	3	+	13642679	13644086	1408	1	Novel_lncRNA	Others(anti down)	1.71	0.83	-1.04281	2.73801e-12	yes
MSTRG.8624	MSTRG.8624.1	3	-	13642679	13644086	1408	1	Novel_lncRNA	Others(sense updown)	5.18	2.32	-1.15883	8.77025e-38	yes
MSTRG.8626	MSTRG.8626.1	3	+	13644411	13645303	893	1	Novel_lncRNA	Antisense LncRNAs	3.23	0.77	-2.0686	1.46807e-24	yes
Os03g0357200	Os03t0357200-01	3	+	13807793	13808292	500	1	Annotated_lncRNA	ncRNA	2.15	0.56	-1.94084	0.00964171	yes
MSTRG.8649	MSTRG.8649.1	3	-	14032614	14034116	1503	1	Novel_lncRNA	Intergenic LncRNAs	32.83	37.5	0.191876	2.50139e-42
MSTRG.8650	MSTRG.8650.1	3	+	14033528	14034114	587	1	Novel_lncRNA	Intergenic LncRNAs	0	0.14	7.12928	0.539658
Os03g0373601	Os03t0373601-00	3	-	14706965	14707330	366	1	Annotated_lncRNA	ncRNA	54.72	9.96	-2.45785	0.0351971	yes
MSTRG.8714	MSTRG.8714.1	3	-	14854285	14854562	278	1	Novel_lncRNA	Bidirectional LncRNAs	2.92	2.92	0	0.03759
MSTRG.8733	MSTRG.8733.1	3	-	15132012	15132817	806	1	Novel_lncRNA	Intergenic LncRNAs	3.7	2.51	-0.559838	2.01653e-10
Os03g0391850	Os03t0391850-00	3	+	15719191	15719702	415	2	Annotated_lncRNA	ncRNA	0.91	0.38	-1.25987	0.0158655	yes
Os03g0397900	Os03t0397900-00	3	+	16073198	16075736	1238	7	Annotated_lncRNA	ncRNA	2.86	1.27	-1.17119	0.000696282	yes
Os03g0399466	Os03t0399466-00	3	-	16181722	16181932	211	1	Annotated_lncRNA	ncRNA	0.31	0.39	0.331206	0.0452305
Os03g0401366	Os03t0401366-01	3	-	16306856	16307624	769	1	Annotated_lncRNA	ncRNA	53.99	7.24	-2.89863	0.0255509	yes
MSTRG.8819	MSTRG.8819.1	3	-	16378627	16379087	261	2	Novel_lncRNA	Sense LncRNAs	0.25	0.29	0.214125	1
Os03g0405400	Os03t0405400-01	3	-	16588547	16593603	4903	2	Annotated_lncRNA	ncRNA	4.15	9.89	1.25286	0.0140805	yes
Os03g0405525	Os03t0405525-00	3	-	16593756	16595071	802	3	Annotated_lncRNA	ncRNA	142.22	144.55	0.0234442	0.0302684
Os03g0406001	Os03t0406001-00	3	-	16629692	16631212	810	3	Annotated_lncRNA	ncRNA	27.81	54.21	0.962955	0.00782444
Os03g0406250	Os03t0406250-00	3	+	16658131	16658813	683	1	Annotated_lncRNA	ncRNA	6.41	1.7	-1.91479	0.0912296
Os03g0408401	Os03t0408401-00	3	+	16788230	16789167	884	2	Annotated_lncRNA	ncRNA	192.08	136.06	-0.497464	0.029286
MSTRG.8845	MSTRG.8845.2	3	+	16788405	16790887	2483	1	Novel_lncRNA	Sense LncRNAs	2.32	3	0.370838	0.000204981
MSTRG.8925	MSTRG.8925.1	3	+	18112904	18116812	1059	4	Novel_lncRNA	Sense LncRNAs	1.66	1.67	0.00866486	0.00139362
MSTRG.8956	MSTRG.8956.1	3	-	18932124	18932771	648	1	Novel_lncRNA	Intergenic LncRNAs	1.3	0.63	-1.04509	3.82018e-05	yes
Os03g0452801	Os03t0452801-00	3	+	19413235	19413532	298	1	Annotated_lncRNA	ncRNA	4.15	4	-0.0531113	0.0530488
MSTRG.8967	MSTRG.8967.1	3	-	19713838	19717599	3452	2	Novel_lncRNA	Sense LncRNAs	3.33	0.23	-3.85582	7.22733e-137	yes
MSTRG.8968	MSTRG.8968.1	3	-	19815041	19815336	296	1	Novel_lncRNA	Intergenic LncRNAs	1.21	1.46	0.270961	0.362645
MSTRG.8971	MSTRG.8971.1	3	-	19954511	19955190	680	1	Novel_lncRNA	Intergenic LncRNAs	15.02	12.29	-0.2894	1.69433e-23
MSTRG.8972	MSTRG.8972.1	3	-	19976010	19976373	364	1	Novel_lncRNA	Intergenic LncRNAs	78.94	162.98	1.04587	0.0630617
Os03g0569850	Os03t0569850-00	3	-	20651174	20652231	949	2	Annotated_lncRNA	ncRNA	3.12	2.47	-0.337035	0.0220686
MSTRG.9013	MSTRG.9013.1	3	+	21055795	21056704	529	2	Novel_lncRNA	Bidirectional LncRNAs	1.29	0	-10.3332	5.11175e-08	yes
Os03g0576801	Os03t0576801-00	3	+	21086653	21087054	320	2	Annotated_lncRNA	ncRNA	4.02	13.21	1.71636	0.0662544
MSTRG.9024	MSTRG.9024.2	3	+	21179908	21184440	2982	7	Novel_lncRNA	Sense LncRNAs	2.96	1.08	-1.45457	1.16289e-53	yes
MSTRG.9024	MSTRG.9024.3	3	+	21179908	21184440	4356	2	Novel_lncRNA	Sense LncRNAs	4.99	1.28	-1.9629	1.15557e-162	yes
MSTRG.9025	MSTRG.9025.1	3	-	21186042	21186565	524	1	Novel_lncRNA	Intergenic LncRNAs	1.36	1.26	-0.110183	0.0235755
MSTRG.9026	MSTRG.9026.1	3	+	21191076	21191817	742	1	Novel_lncRNA	Intergenic LncRNAs	2.27	1.81	-0.326703	5.01476e-05
Os03g0579800	Os03t0579800-01	3	-	21267989	21273094	1613	3	Annotated_lncRNA	ncRNA	0	1.7	10.7313	0.0142528	yes
MSTRG.9033	MSTRG.9033.2	3	+	21334905	21338303	993	2	Novel_lncRNA	Sense LncRNAs	0.91	1.53	0.749593	0.697649
MSTRG.9034	MSTRG.9034.2	3	-	21338369	21340313	477	2	Novel_lncRNA	Sense LncRNAs	2.14	1.68	-0.34915	0.00126261
MSTRG.9037	MSTRG.9037.1	3	+	21371145	21375773	735	4	Novel_lncRNA	Sense LncRNAs	7.28	2.38	-1.61298	8.8744e-36	yes
Os03g0581701	Os03t0581701-00	3	+	21375539	21375773	235	1	Annotated_lncRNA	ncRNA	5.04	24.05	2.25454	0.0156895	yes
Os03g0584100	Os03t0584100-01	3	+	21501406	21506577	563	2	Annotated_lncRNA	ncRNA	9.56	20.97	1.13324	0.000813481	yes
MSTRG.9062	MSTRG.9062.1	3	+	21954147	21957702	3483	2	Novel_lncRNA	Sense LncRNAs	3.04	0	-11.5699	3.57412e-121	yes
Os03g0593650	Os03t0593650-00	3	-	22049521	22050069	549	1	Annotated_lncRNA	ncRNA	1.56	3.28	1.07215	0.00429064	yes
MSTRG.9067	MSTRG.9067.2	3	-	22053625	22057136	1430	4	Novel_lncRNA	Sense LncRNAs	2.95	0.36	-3.03465	1.39306e-46	yes
MSTRG.9067	MSTRG.9067.1	3	-	22053625	22057136	1652	3	Novel_lncRNA	Sense LncRNAs	3.47	0.06	-5.85383	1.17384e-66	yes
Os03g0602400	Os03t0602400-01	3	-	22539368	22540090	613	2	Annotated_lncRNA	ncRNA	5.8	0.3	-4.27302	0.00465737	yes
MSTRG.9100	MSTRG.9100.1	3	-	22603764	22604048	285	1	Novel_lncRNA	Others(sense updown)	1.25	1.51	0.27262	0.362645
Os03g0605400	Os03t0605400-01	3	-	22715554	22718500	1141	4	Annotated_lncRNA	ncRNA	58.57	89.11	0.605425	0.00039469
MSTRG.9120	MSTRG.9120.1	3	-	22873935	22876929	899	2	Novel_lncRNA	Sense LncRNAs	2.3	0.25	-3.20163	1.32213e-23	yes
Os03g0608200	Os03t0608200-01	3	-	22874664	22876929	2266	1	Annotated_lncRNA	ncRNA	8.22	2.1	-1.96875	0.0475302	yes
Os03g0609400	Os03t0609400-01	3	+	22971541	22972365	825	1	Annotated_lncRNA	ncRNA	1.01	0.12	-3.07325	0.00164693	yes
Os03g0611100	Os03t0611100-01	3	+	23076780	23077959	1180	1	Annotated_lncRNA	ncRNA	15.35	13.69	-0.165116	0.0527055
Os03g0618366	Os03t0618366-00	3	+	23451226	23451562	337	1	Annotated_lncRNA	ncRNA	3.64	5.77	0.664633	0.00317725
Os03g0618900	Os03t0618900-01	3	+	23465925	23466826	902	1	Annotated_lncRNA	ncRNA	7.86	7.68	-0.033423	5.31636e-05
MSTRG.9155	MSTRG.9155.1	3	-	23623622	23630664	6857	3	Novel_lncRNA	Sense LncRNAs	6.75	0.2	-5.07682	0	yes
Os03g0626650	Os03t0626650-00	3	-	23857014	23861568	1880	10	Annotated_lncRNA	ncRNA	1.97	2.97	0.592267	0.00837187
Os03g0626900	Os03t0626900-00	3	-	23889014	23895370	1119	6	Annotated_lncRNA	ncRNA	6.34	1.04	-2.6079	0.0242706	yes
Os03g0646850	Os03t0646850-00	3	-	25040422	25041271	685	2	Annotated_lncRNA	ncRNA	13.76	30.11	1.12976	0.0365554	yes
Os03g0647550	Os03t0647550-00	3	+	25063964	25064641	580	2	Annotated_lncRNA	ncRNA	2.19	0	-11.0967	0.0314158	yes
Os03g0647950	Os03t0647950-00	3	+	25096446	25096807	362	1	Annotated_lncRNA	ncRNA	0.84	12.33	3.87564	0.0162454	yes
MSTRG.9257	MSTRG.9257.1	3	+	25247264	25248083	820	1	Novel_lncRNA	Intergenic LncRNAs	31.78	28.86	-0.139048	7.12971e-45
MSTRG.9258	MSTRG.9258.1	3	-	25247844	25248083	240	1	Novel_lncRNA	Intergenic LncRNAs	25.88	69.17	1.41831	6.67268e-05	yes
MSTRG.9259	MSTRG.9259.1	3	+	25249486	25249975	341	2	Novel_lncRNA	Others(sense updown)	0.88	0.3	-1.55254	0.0095606	yes
Os03g0650850	Os03t0650850-01	3	+	25267550	25267893	344	1	Annotated_lncRNA	ncRNA	53.81	13.73	-1.97054	0.0302353	yes
Os03g0653601	Os03t0653601-01	3	+	25462885	25468265	1485	8	Annotated_lncRNA	ncRNA	7.25	8.75	0.271302	1.91019e-05
MSTRG.9296	MSTRG.9296.1	3	-	25733121	25733328	208	1	Novel_lncRNA	Intergenic LncRNAs	3.78	0	-11.8842	1.6859e-09	yes
MSTRG.9359	MSTRG.9359.1	3	+	26438911	26439288	378	1	Novel_lncRNA	Others(sense updown)	4.12	1.27	-1.69782	6.7547e-12	yes
MSTRG.9377	MSTRG.9377.1	3	-	26679039	26683368	4330	1	Novel_lncRNA	Antisense LncRNAs	1.08	0.19	-2.50696	3.33816e-45	yes
Os03g0676866	Os03t0676866-00	3	+	26755878	26756258	381	1	Annotated_lncRNA	ncRNA	41.93	38.71	-0.115277	0.0158655
Os03g0678100	Os03t0678100-00	3	+	26831934	26832408	475	1	Annotated_lncRNA	ncRNA	76.02	30.91	-1.29831	0.0314919	yes
MSTRG.9393	MSTRG.9393.1	3	+	27087853	27088067	215	1	Novel_lncRNA	Others(sense updown)	0.15	0	-7.22882	1
MSTRG.9392	MSTRG.9392.1	3	-	27087853	27088088	236	1	Novel_lncRNA	Bidirectional LncRNAs	0.27	0	-8.07682	0.281469
MSTRG.9424	MSTRG.9424.1	3	-	27371197	27373772	1308	4	Novel_lncRNA	Sense LncRNAs	2.34	0.15	-3.96347	8.45584e-37	yes
Os03g0688250	Os03t0688250-00	3	+	27460603	27461221	619	1	Annotated_lncRNA	ncRNA	4.3	3.59	-0.260353	0.000215089
MSTRG.9452	MSTRG.9452.1	3	+	27610310	27610591	282	1	Novel_lncRNA	Intergenic LncRNAs	276.92	61.37	-2.17386	0	yes
MSTRG.9453	MSTRG.9453.1	3	+	27612455	27612903	449	1	Novel_lncRNA	Others(sense updown)	892.88	427.34	-1.06308	0	yes
MSTRG.9454	MSTRG.9454.1	3	-	27612584	27612800	217	1	Novel_lncRNA	Bidirectional LncRNAs	4.04	3.04	-0.410284	0.00297705
Os03g0691900	Os03t0691900-00	3	-	27672581	27673987	475	2	Annotated_lncRNA	ncRNA	1.53	0	-10.5793	0.0801689
MSTRG.9465	MSTRG.9465.2	3	-	27784418	27792047	311	2	Novel_lncRNA	Sense LncRNAs	0	1.49	10.5411	0.00247445	yes
Os03g0698066	Os03t0698066-00	3	-	27983787	27985263	1410	2	Annotated_lncRNA	ncRNA	2.62	0.85	-1.62403	0.00541805	yes
Os03g0698400	Os03t0698400-01	3	-	27989538	27989824	287	1	Annotated_lncRNA	ncRNA	1.27	0	-10.3106	0.0078395	yes
Os03g0699750	Os03t0699750-00	3	-	28052636	28053417	782	1	Annotated_lncRNA	ncRNA	1.48	0.74	-1	0.00429064
Os03g0704901	Os03t0704901-01	3	-	28334900	28336670	1771	1	Annotated_lncRNA	ncRNA	13.25	18.09	0.4492	0.0164737
Os03g0707250	Os03t0707250-01	3	+	28473276	28473643	368	1	Annotated_lncRNA	ncRNA	6.19	7.84	0.340914	0.0259029
Os03g0710850	Os03t0710850-00	3	-	28665459	28667348	718	4	Annotated_lncRNA	ncRNA	3.09	3.19	0.0459496	0.00202368
Os03g0719150	Os03t0719150-00	3	-	29128183	29134431	2334	15	Annotated_lncRNA	ncRNA	0.33	2.11	2.67671	0.0246743	yes
Os03g0720033	Os03t0720033-00	3	+	29185295	29187618	1606	3	Annotated_lncRNA	ncRNA	2.98	3.14	0.0754522	0.0169117
MSTRG.9628	MSTRG.9628.1	3	-	29382367	29382672	306	1	Novel_lncRNA	Intergenic LncRNAs	157.34	141.84	-0.149621	7.39044e-82
Os03g0724400	Os03t0724400-00	3	+	29426851	29429169	1070	3	Annotated_lncRNA	ncRNA	5.41	0.76	-2.83156	0.016919	yes
Os03g0725601	Os03t0725601-01	3	-	29487579	29490095	2517	1	Annotated_lncRNA	ncRNA	4.58	2.05	-1.15972	0.097906
Os03g0730600	Os03t0730600-00	3	-	29872916	29875190	1342	3	Annotated_lncRNA	ncRNA	5.63	5.45	-0.0468787	0.051814
Os03g0733200	Os03t0733200-00	3	+	30027665	30029012	1348	1	Annotated_lncRNA	ncRNA	9.96	21.96	1.14066	0.0305438	yes
Os03g0740650	Os03t0740650-00	3	-	30384564	30385528	430	3	Annotated_lncRNA	ncRNA	2.11	1.49	-0.501931	0.0537786
Os03g0740900	Os03t0740900-01	3	+	30400921	30401584	664	1	Annotated_lncRNA	ncRNA	2.64	0.76	-1.79647	0.0900923
Os03g0741050	Os03t0741050-01	3	+	30403047	30405978	2932	1	Annotated_lncRNA	ncRNA	31.82	9.61	-1.72733	0.0876644
MSTRG.9751	MSTRG.9751.2	3	+	30517571	30519627	1971	2	Novel_lncRNA	Sense LncRNAs	0.68	1.04	0.612977	0.339426
MSTRG.9764	MSTRG.9764.2	3	+	30626693	30630707	1899	7	Novel_lncRNA	Sense LncRNAs	9.33	0.86	-3.43947	3.58276e-205	yes
MSTRG.9764	MSTRG.9764.3	3	+	30626693	30629545	2462	4	Novel_lncRNA	Sense LncRNAs	9.39	2.24	-2.06763	1.47678e-179	yes
Os03g0748050	Os03t0748050-00	3	-	30780206	30781144	500	3	Annotated_lncRNA	ncRNA	2.52	5.92	1.23217	0.0802341
MSTRG.9810	MSTRG.9810.2	3	-	30994839	30996793	1955	1	Novel_lncRNA	Sense LncRNAs	2.66	0.32	-3.05528	1.01323e-56	yes
MSTRG.9810	MSTRG.9810.3	3	-	30994839	30996793	1765	2	Novel_lncRNA	Sense LncRNAs	2.83	0.53	-2.41674	7.87125e-46	yes
Os03g0755150	Os03t0755150-00	3	-	31150256	31154990	1907	15	Annotated_lncRNA	ncRNA	0.86	1.62	0.913585	0.0812034
MSTRG.9829	MSTRG.9829.1	3	-	31179542	31188645	1189	5	Novel_lncRNA	Sense LncRNAs	66.8	361.06	2.43432	0	yes
MSTRG.9829	MSTRG.9829.3	3	-	31181460	31188645	1393	4	Novel_lncRNA	Others(sense updown),Others(sense updown)	45.46	112.42	1.30623	8.15689e-19	yes
Os03g0757550	Os03t0757550-01	3	-	31301318	31303076	790	3	Annotated_lncRNA	ncRNA	0.23	3.01	3.71006	0.0182866	yes
Os03g0765050	Os03t0765050-00	3	-	31674694	31677409	925	6	Annotated_lncRNA	ncRNA	15.25	7.45	-1.0335	0.0917869
Os03g0766950	Os03t0766950-00	3	-	31759271	31759685	415	1	Annotated_lncRNA	ncRNA	2.09	0	-11.0293	0.0236687	yes
MSTRG.9915	MSTRG.9915.1	3	+	31809445	31809763	319	1	Novel_lncRNA	Intergenic LncRNAs	16.98	7.23	-1.23177	1.41175e-29	yes
MSTRG.9916	MSTRG.9916.1	3	-	31810541	31811425	885	1	Novel_lncRNA	Intergenic LncRNAs	1.63	0.65	-1.32636	2.88768e-09	yes
MSTRG.9917	MSTRG.9917.1	3	+	31811038	31811738	701	1	Novel_lncRNA	Intergenic LncRNAs	38.93	9.08	-2.10012	6.44382e-213	yes
Os03g0769025	Os03t0769025-00	3	-	31831388	31831979	592	1	Annotated_lncRNA	ncRNA	44.13	0	-15.4295	0.00182964	yes
Os03g0769450	Os03t0769450-00	3	-	31855082	31857863	1899	3	Annotated_lncRNA	ncRNA	1.46	0	-10.5118	0.0885419
MSTRG.9945	MSTRG.9945.1	3	-	32057128	32057498	371	1	Novel_lncRNA	Intergenic LncRNAs	1.14	0.34	-1.74543	0.000566065	yes
Os03g0775650	Os03t0775650-00	3	-	32160817	32163960	1330	2	Annotated_lncRNA	ncRNA	1.62	1.56	-0.0544478	0.0507039
Os03g0781501	Os03t0781501-01	3	-	32398404	32399832	399	2	Annotated_lncRNA	ncRNA	0.55	0.7	0.347923	0.0141464
Os03g0786751	Os03t0786751-00	3	-	32666221	32670202	1320	10	Annotated_lncRNA	ncRNA	6.16	1.92	-1.68182	0.0111939	yes
Os03g0787400	Os03t0787400-01	3	-	32711829	32712223	395	1	Annotated_lncRNA	ncRNA	0.83	3.51	2.08029	0.0330831	yes
MSTRG.10056	MSTRG.10056.1	3	-	32829161	32832483	1452	5	Novel_lncRNA	Sense LncRNAs	1.79	1.39	-0.364875	1.40575e-07
Os03g0792050	Os03t0792050-00	3	+	32930557	32935313	466	4	Annotated_lncRNA	ncRNA	16.59	21.07	0.344876	0.0525181
Os03g0799250	Os03t0799250-00	3	-	33316692	33318933	1865	3	Annotated_lncRNA	ncRNA	0.39	1.99	2.35122	0.00671777	yes
Os03g0802200	Os03t0802200-01	3	+	33471596	33472293	587	2	Annotated_lncRNA	ncRNA	2.89	0	-11.4969	0.0179563	yes
MSTRG.10210	MSTRG.10210.1	3	+	33916356	33916635	280	1	Novel_lncRNA	Others(anti down)	2.2	4.07	0.887525	1
Os03g0812500	Os03t0812500-01	3	+	34039087	34045065	1494	5	Annotated_lncRNA	ncRNA	0.58	1.33	1.1973	0.0943963
MSTRG.10228	MSTRG.10228.1	3	+	34039087	34045065	1430	4	Novel_lncRNA	Sense LncRNAs	9.66	8.79	-0.13616	4.7014e-25
Os03g0815266	Os03t0815266-00	3	+	34167934	34168225	292	1	Annotated_lncRNA	ncRNA	9.86	10.19	0.0474945	0.000103909
Os03g0818250	Os03t0818250-00	3	-	34342456	34343021	320	2	Annotated_lncRNA	ncRNA	0.73	1.19	0.704993	0.0158655
MSTRG.10259	MSTRG.10259.1	3	-	34354513	34355062	550	1	Novel_lncRNA	Intergenic LncRNAs	5.9	6.77	0.198441	0.000394976
Os03g0821275	Os03t0821275-00	3	-	34471668	34471874	207	1	Annotated_lncRNA	ncRNA	10.12	1.53	-2.72561	0.0158655	yes
Os03g0821325	Os03t0821325-00	3	+	34475239	34478266	1756	5	Annotated_lncRNA	ncRNA	0.84	0.35	-1.26303	0.00735691	yes
Os03g0823750	Os03t0823750-00	3	+	34593570	34596200	643	2	Annotated_lncRNA	ncRNA	0.13	1.61	3.63048	0.0375634	yes
Os03g0827650	Os03t0827650-00	3	+	34759326	34762210	1343	5	Annotated_lncRNA	ncRNA	0.72	0.42	-0.777608	0.0721432
Os03g0828701	Os03t0828701-00	3	+	34808955	34809631	466	3	Annotated_lncRNA	ncRNA	5.35	3.31	-0.692708	0.0800912
Os03g0835950	Os03t0835950-00	3	-	35123591	35124074	484	1	Annotated_lncRNA	ncRNA	9.56	20.71	1.11525	0.0736369
Os03g0839600	Os03t0839600-01	3	-	35294108	35295528	811	2	Annotated_lncRNA	ncRNA	2.6	0.46	-2.49881	0.0756738
Os03g0840350	Os03t0840350-00	3	-	35335224	35335627	404	1	Annotated_lncRNA	ncRNA	3.31	46.04	3.79798	0.0407155	yes
Os03g0841150	Os03t0841150-00	3	+	35360899	35362788	902	2	Annotated_lncRNA	ncRNA	1.44	3.66	1.34577	0.0819248
MSTRG.10409	MSTRG.10409.1	3	-	35405889	35407275	659	3	Novel_lncRNA	Intergenic LncRNAs	3.05	0.65	-2.2303	5.28051e-18	yes
Os03g0843000	Os03t0843000-01	3	+	35431602	35432500	523	2	Annotated_lncRNA	ncRNA	1.44	1.98	0.459432	0.024559
Os03g0843150	Os03t0843150-00	3	+	35433121	35434380	557	2	Annotated_lncRNA	ncRNA	11.27	113.19	3.32819	0.0284104	yes
MSTRG.10439	MSTRG.10439.1	3	+	35603003	35603435	433	1	Novel_lncRNA	Intergenic LncRNAs	36.61	157.53	2.10532	9.24089e-64	yes
MSTRG.10440	MSTRG.10440.1	3	-	35603221	35603461	241	1	Novel_lncRNA	Intergenic LncRNAs	12.48	10.22	-0.288223	9.56117e-08
MSTRG.10442	MSTRG.10442.1	3	-	35619330	35620231	902	1	Novel_lncRNA	Intergenic LncRNAs	1.83	1.24	-0.561504	3.15315e-06
Os03g0847851	Os03t0847851-00	3	+	35653192	35653588	397	1	Annotated_lncRNA	ncRNA	1.86	1.68	-0.146841	0.00655922
Os03g0849300	Os03t0849300-01	3	+	35729864	35735904	741	3	Annotated_lncRNA	ncRNA	2.73	16.54	2.59899	0.0219893	yes
Os03g0851150	Os03t0851150-00	3	+	35826465	35830218	1708	12	Annotated_lncRNA	ncRNA	24.12	16.29	-0.566243	0.056892
Os03g0852101	Os03t0852101-00	3	+	35883623	35886649	826	3	Annotated_lncRNA	ncRNA	4.52	3.04	-0.572251	0.096688
Os03g0859550	Os03t0859550-01	3	+	36281121	36282881	792	3	Annotated_lncRNA	ncRNA	2.74	0	-11.42	0.0342444	yes
MSTRG.10534	MSTRG.10534.1	3	+	36281121	36282881	1761	1	Novel_lncRNA	Antisense LncRNAs	2.83	0.75	-1.91584	4.97798e-38	yes
Os03g0860950	Os03t0860950-00	3	-	36341680	36342107	428	1	Annotated_lncRNA	ncRNA	1.25	0	-10.2877	0.0704257
Os03g0862150	Os03t0862150-00	3	-	36399208	36401341	1223	4	Annotated_lncRNA	ncRNA	1.43	0.09	-3.98995	0.02349	yes
Os03g0862300	Os03t0862300-00	3	+	36403082	36413292	1676	9	Annotated_lncRNA	ncRNA	4	6.06	0.599318	0.00478048
MSTRG.10554	MSTRG.10554.1	4	+	88844	89408	361	2	Novel_lncRNA	Sense LncRNAs	0.99	1.26	0.347923	0.482683
Os04g0103351	Os04t0103351-00	4	+	227030	228665	867	5	Annotated_lncRNA	ncRNA	6.39	4.16	-0.619232	0.0393138
Os04g0105450	Os04t0105450-00	4	+	359245	360369	1043	2	Annotated_lncRNA	ncRNA	0.37	2.71	2.8727	0.0863573
Os04g0115600	Os04t0115600-01	4	-	922561	928320	1035	4	Annotated_lncRNA	ncRNA	2.91	6.13	1.07487	0.00428114	yes
MSTRG.10610	MSTRG.10610.2	4	+	937900	940774	538	2	Novel_lncRNA	Sense LncRNAs	2.94	15.93	2.43786	1.39912e-13	yes
MSTRG.10630	MSTRG.10630.1	4	-	1325252	1327635	502	3	Novel_lncRNA	Sense LncRNAs	2.6	3.29	0.339576	0.0705697
Os04g0129400	Os04t0129400-01	4	-	1848749	1849281	533	1	Annotated_lncRNA	ncRNA	88.83	74.64	-0.251098	0.0348546
MSTRG.10648	MSTRG.10648.1	4	+	2086083	2086299	217	1	Novel_lncRNA	Intergenic LncRNAs	0.3	0	-8.22882	0.281469
Os04g0166450	Os04t0166450-00	4	+	4513296	4513875	580	1	Annotated_lncRNA	ncRNA	4.23	7.24	0.775332	0.00440714
MSTRG.10694	MSTRG.10694.1	4	-	4705931	4706253	323	1	Novel_lncRNA	Intergenic LncRNAs	1.1	0.39	-1.49596	0.00315195	yes
MSTRG.10699	MSTRG.10699.1	4	-	4771974	4772458	485	1	Novel_lncRNA	Others(anti down)	4.48	1.57	-1.51273	1.28094e-14	yes
MSTRG.10708	MSTRG.10708.1	4	-	5058331	5061130	686	4	Novel_lncRNA	Sense LncRNAs	2.52	0.93	-1.43812	1.67571e-11	yes
Os04g0175750	Os04t0175750-01	4	-	5167705	5170461	2380	3	Annotated_lncRNA	ncRNA	1.47	0	-10.5216	0.00182941	yes
MSTRG.10721	MSTRG.10721.1	4	+	5269519	5269787	269	1	Novel_lncRNA	Intergenic LncRNAs	16.16	7.82	-1.04719	1.40416e-21	yes
MSTRG.10722	MSTRG.10722.1	4	+	5274913	5276582	1670	1	Novel_lncRNA	Intergenic LncRNAs	1.81	1.78	-0.0241125	1.61998e-05
Os04g0182225	Os04t0182225-00	4	-	5590462	5591999	750	2	Annotated_lncRNA	ncRNA	3.49	0.71	-2.29734	0.0687575
Os04g0182701	Os04t0182701-01	4	+	5629761	5630068	308	1	Annotated_lncRNA	ncRNA	1.86	0.9	-1.04731	0.00669662	yes
MSTRG.10736	MSTRG.10736.1	4	+	5712772	5713870	441	3	Novel_lncRNA	Intergenic LncRNAs	1.69	0	-10.7228	6.57177e-09	yes
MSTRG.10740	MSTRG.10740.1	4	+	6052979	6053611	510	2	Novel_lncRNA	Others(anti down)	0.06	0.94	3.96963	0.0266912	yes
MSTRG.10747	MSTRG.10747.1	4	-	6343183	6343705	523	1	Novel_lncRNA	Intergenic LncRNAs	5.64	2.57	-1.13393	7.7773e-16	yes
MSTRG.10777	MSTRG.10777.1	4	+	7380444	7381230	787	1	Novel_lncRNA	Intergenic LncRNAs	1.36	0.06	-4.5025	9.38094e-13	yes
MSTRG.10779	MSTRG.10779.2	4	-	7873586	7876169	1896	3	Novel_lncRNA	Sense LncRNAs	2.52	0.39	-2.69188	4.54623e-47	yes
Os04g0233851	Os04t0233851-00	4	+	8948714	8949839	848	4	Annotated_lncRNA	ncRNA	0	243.89	17.8959	0.0325554	yes
MSTRG.10831	MSTRG.10831.1	4	-	9091121	9092446	786	2	Novel_lncRNA	Intergenic LncRNAs	98.68	101.14	0.0355241	1.24959e-86
MSTRG.10832	MSTRG.10832.1	4	-	9092647	9093017	371	1	Novel_lncRNA	Intergenic LncRNAs	43.66	78.59	0.848034	0.394309
MSTRG.10833	MSTRG.10833.1	4	+	9093023	9094118	1096	1	Novel_lncRNA	Intergenic LncRNAs	17.69	34.56	0.966169	0.640402
MSTRG.10840	MSTRG.10840.1	4	-	9181440	9185127	3645	2	Novel_lncRNA	Others(sense updown)	57.22	470.46	3.03948	0	yes
MSTRG.10841	MSTRG.10841.1	4	-	9186515	9190116	3602	1	Novel_lncRNA	Intergenic LncRNAs	50.21	14.59	-1.78299	0	yes
MSTRG.10842	MSTRG.10842.1	4	-	9192054	9192374	321	1	Novel_lncRNA	Intergenic LncRNAs	19.81	54.86	1.46953	6.10303e-06	yes
MSTRG.10844	MSTRG.10844.1	4	+	9209868	9210431	564	1	Novel_lncRNA	Intergenic LncRNAs	36.5	112.86	1.62857	1.90053e-26	yes
MSTRG.10861	MSTRG.10861.1	4	+	9696939	9697178	240	1	Novel_lncRNA	Intergenic LncRNAs	42.73	9.11	-2.22973	3.51286e-87	yes
MSTRG.10868	MSTRG.10868.1	4	+	10431456	10432657	1202	1	Novel_lncRNA	Intergenic LncRNAs	3.56	3.31	-0.105046	2.71426e-08
MSTRG.10874	MSTRG.10874.1	4	-	10947773	10949394	1622	1	Novel_lncRNA	Intergenic LncRNAs	5.28	2.79	-0.920273	4.19694e-37
MSTRG.10883	MSTRG.10883.4	4	-	11268559	11271530	2802	2	Novel_lncRNA	Sense LncRNAs	3.77	0.13	-4.85798	6.49995e-123	yes
MSTRG.10883	MSTRG.10883.3	4	-	11268559	11271530	2795	2	Novel_lncRNA	Sense LncRNAs	4.12	0.13	-4.98606	5.67175e-134	yes
Os04g0271450	Os04t0271450-01	4	-	11336231	11340189	3959	1	Annotated_lncRNA	ncRNA	3.61	0.27	-3.74097	0.0537705
MSTRG.10893	MSTRG.10893.3	4	+	11450590	11452839	1221	3	Novel_lncRNA	Sense LncRNAs	5.31	3.54	-0.584963	1.37031e-21
Os04g0273350	Os04t0273350-01	4	-	11463433	11464047	615	1	Annotated_lncRNA	ncRNA	8.79	2.33	-1.91553	0.00360228	yes
Os04g0283001	Os04t0283001-00	4	+	12120043	12120317	275	1	Annotated_lncRNA	ncRNA	0.96	1.21	0.333901	0.0428413
MSTRG.10911	MSTRG.10911.1	4	+	12158588	12158941	354	1	Novel_lncRNA	Others(sense updown)	1.68	0.03	-5.80735	3.92801e-07	yes
MSTRG.10919	MSTRG.10919.1	4	+	12343255	12343488	234	1	Novel_lncRNA	Intergenic LncRNAs	0	0.22	7.78136	1
MSTRG.10926	MSTRG.10926.1	4	+	12545853	12546304	452	1	Novel_lncRNA	Antisense LncRNAs	0.57	1.23	1.10962	1
MSTRG.10936	MSTRG.10936.1	4	+	12857850	12859044	1195	1	Novel_lncRNA	Intergenic LncRNAs	2.2	2.39	0.119507	0.000356902
MSTRG.10943	MSTRG.10943.3	4	-	13086354	13088777	839	5	Novel_lncRNA	Sense LncRNAs	0	0.59	9.20457	0.00134418	yes
MSTRG.10958	MSTRG.10958.1	4	-	13817270	13820180	1308	2	Novel_lncRNA	Sense LncRNAs	1.35	1.02	-0.40439	1.00815e-05
MSTRG.10963	MSTRG.10963.2	4	-	13918557	13928367	7982	5	Novel_lncRNA	Antisense LncRNAs	4.76	0.33	-3.85042	0	yes
Os04g0311500	Os04t0311500-00	4	-	14132242	14134548	402	2	Annotated_lncRNA	ncRNA	0.2	0.83	2.05311	0.0831107
MSTRG.10977	MSTRG.10977.2	4	-	14221928	14228281	4038	4	Novel_lncRNA	Intergenic LncRNAs	3.95	0.62	-2.67151	1.41295e-152	yes
MSTRG.10977	MSTRG.10977.1	4	-	14221928	14228281	2008	3	Novel_lncRNA	Intergenic LncRNAs	6.83	2.08	-1.7153	1.38715e-93	yes
MSTRG.10979	MSTRG.10979.1	4	+	14377132	14377423	292	1	Novel_lncRNA	Intergenic LncRNAs	1.22	0.35	-1.80145	0.00315195	yes
MSTRG.10993	MSTRG.10993.2	4	+	14956367	14960836	3803	5	Novel_lncRNA	Sense LncRNAs	2.11	0.02	-6.7211	3.23763e-92	yes
MSTRG.10993	MSTRG.10993.1	4	+	14956367	14960836	4027	4	Novel_lncRNA	Sense LncRNAs	5.94	0.15	-5.30743	3.08113e-273	yes
MSTRG.11004	MSTRG.11004.1	4	+	15516050	15518523	888	4	Novel_lncRNA	Intergenic LncRNAs	5.55	0.68	-3.02888	1.45666e-53	yes
MSTRG.11017	MSTRG.11017.1	4	+	16289091	16289393	303	1	Novel_lncRNA	Antisense LncRNAs	0.54	0	-9.07682	0.0197304	yes
MSTRG.11025	MSTRG.11025.1	4	-	16527395	16527640	246	1	Novel_lncRNA	Intergenic LncRNAs	1.06	1.34	0.338169	0.542404
Os04g0349300	Os04t0349300-00	4	-	16637645	16638971	1327	1	Annotated_lncRNA	ncRNA	3.89	0.48	-3.01866	0.00154379	yes
Os04g0350201	Os04t0350201-00	4	-	16700633	16703516	769	7	Annotated_lncRNA	ncRNA	1.11	0.26	-2.09398	0.0467018	yes
Os04g0357200	Os04t0357200-01	4	+	17061923	17071581	1301	6	Annotated_lncRNA	ncRNA	8.35	0.89	-3.2299	0.00326996	yes
MSTRG.11054	MSTRG.11054.1	4	-	17440619	17442968	591	3	Novel_lncRNA	Intergenic LncRNAs	12	1.77	-2.76121	2.53845e-71	yes
Os04g0372750	Os04t0372750-00	4	-	18171104	18171646	543	1	Annotated_lncRNA	ncRNA	4.23	5.75	0.442904	0.0073487
MSTRG.11084	MSTRG.11084.1	4	+	18476578	18477990	1413	1	Novel_lncRNA	Others(anti down)	18.94	31.94	0.753928	0.0120419
Os04g0378400	Os04t0378400-01	4	-	18478742	18480215	1474	1	Annotated_lncRNA	ncRNA	52.07	37.93	-0.457113	0.000144832
MSTRG.11097	MSTRG.11097.2	4	-	18589876	18594057	692	4	Novel_lncRNA	Sense LncRNAs	2.34	0.12	-4.2854	1.40307e-19	yes
Os04g0380400	Os04t0380400-00	4	+	18603004	18604704	1460	2	Annotated_lncRNA	ncRNA	10.46	39.83	1.92897	0.0315833	yes
Os04g0384650	Os04t0384650-01	4	-	18869479	18870143	665	1	Annotated_lncRNA	ncRNA	0.12	1.87	3.96193	0.0118151	yes
MSTRG.11133	MSTRG.11133.1	4	-	19098205	19098469	265	1	Novel_lncRNA	Intergenic LncRNAs	0	2.99	11.5459	8.82937e-06	yes
MSTRG.11135	MSTRG.11135.1	4	-	19101006	19101582	577	1	Novel_lncRNA	Others(sense updown)	5.4	283.46	5.71404	0	yes
MSTRG.11148	MSTRG.11148.1	4	+	19217344	19217592	249	1	Novel_lncRNA	Intergenic LncRNAs	1.51	0.54	-1.48352	0.00178776	yes
Os04g0394766	Os04t0394766-00	4	+	19420010	19421094	1085	1	Annotated_lncRNA	ncRNA	0.9	0.46	-0.968291	7.246e-06
Os04g0397601	Os04t0397601-00	4	+	19629517	19629745	229	1	Annotated_lncRNA	ncRNA	1.11	0	-10.1163	0.0856264
Os04g0399200	Os04t0399200-01	4	+	19716632	19716949	318	1	Annotated_lncRNA	ncRNA	6.11	2.15	-1.50684	0.0868659
MSTRG.11212	MSTRG.11212.1	4	-	20117097	20119136	1311	5	Novel_lncRNA	Sense LncRNAs	2.87	0.18	-3.99498	4.22741e-45	yes
MSTRG.11212	MSTRG.11212.2	4	-	20117097	20119136	1270	4	Novel_lncRNA	Sense LncRNAs	3.35	0.61	-2.45728	2.7654e-39	yes
MSTRG.11212	MSTRG.11212.3	4	-	20117097	20119136	1415	4	Novel_lncRNA	Sense LncRNAs	5.35	0.9	-2.57154	9.67978e-72	yes
Os04g0408650	Os04t0408650-00	4	+	20224676	20225094	419	1	Annotated_lncRNA	ncRNA	2.37	1.63	-0.540015	0.062767
Os04g0408801	Os04t0408801-00	4	+	20229021	20229438	418	1	Annotated_lncRNA	ncRNA	1.26	0	-10.2992	0.013945	yes
Os04g0410050	Os04t0410050-00	4	-	20256626	20259226	1594	6	Annotated_lncRNA	ncRNA	73.63	96.24	0.386343	0.0654908
Os04g0412225	Os04t0412225-00	4	-	20368516	20369054	539	1	Annotated_lncRNA	ncRNA	3.81	4.17	0.130256	0.0300566
Os04g0412250	Os04t0412250-01	4	-	20371930	20372843	914	1	Annotated_lncRNA	ncRNA	2.5	1.06	-1.23786	0.0744498
MSTRG.11259	MSTRG.11259.1	4	+	20434109	20434361	253	1	Novel_lncRNA	Intronic LncRNAs	0.13	0.5	1.94342	1
Os04g0414400	Os04t0414400-01	4	+	20485333	20485689	357	1	Annotated_lncRNA	ncRNA	2.27	0.6	-1.91966	0.0318443	yes
Os04g0414900	Os04t0414900-01	4	-	20506819	20508788	1970	1	Annotated_lncRNA	ncRNA	2.3	1.64	-0.487938	0.00136141
MSTRG.11304	MSTRG.11304.1	4	-	20987260	20987969	710	1	Novel_lncRNA	Intergenic LncRNAs	5.21	0.04	-7.02514	9.87114e-43	yes
MSTRG.11307	MSTRG.11307.1	4	+	21020827	21021665	839	1	Novel_lncRNA	Intergenic LncRNAs	31.71	6.49	-2.28865	3.99295e-222	yes
Os04g0434700	Os04t0434700-01	4	-	21609418	21609861	444	1	Annotated_lncRNA	ncRNA	8.39	3.47	-1.27374	0.00809299	yes
Os04g0435402	Os04t0435402-00	4	-	21654339	21654767	429	1	Annotated_lncRNA	ncRNA	37.68	12.93	-1.54308	0.0113981	yes
Os04g0435450	Os04t0435450-00	4	-	21656698	21658847	442	2	Annotated_lncRNA	ncRNA	0.92	0.12	-2.9386	0.00544047	yes
Os04g0444250	Os04t0444250-00	4	-	22154341	22154867	527	1	Annotated_lncRNA	ncRNA	1.8	1.96	0.122857	0.0596904
MSTRG.11410	MSTRG.11410.2	4	+	22223823	22227030	2581	3	Novel_lncRNA	Antisense LncRNAs	1.12	0.14	-3	8.76733e-31	yes
MSTRG.11410	MSTRG.11410.3	4	+	22223823	22227030	2491	4	Novel_lncRNA	Antisense LncRNAs	2.26	1.23	-0.877664	3.37789e-24
MSTRG.11417	MSTRG.11417.1	4	+	22262900	22263903	403	2	Novel_lncRNA	Others(sense updown),Others(sense updown)	1.13	0.06	-4.23522	1.16491e-05	yes
Os04g0448250	Os04t0448250-00	4	-	22341408	22346394	2312	5	Annotated_lncRNA	ncRNA	0.72	10.33	3.8427	0.0235089	yes
Os04g0449950	Os04t0449950-00	4	-	22415897	22417223	616	2	Annotated_lncRNA	ncRNA	2.56	8.52	1.73471	0.00100017	yes
Os04g0452350	Os04t0452350-00	4	+	22562930	22564740	1517	2	Annotated_lncRNA	ncRNA	1.22	2.31	0.921012	0.0311219
Os04g0460900	Os04t0460900-01	4	-	23004695	23005301	607	1	Annotated_lncRNA	ncRNA	5.98	2.92	-1.03418	0.00190412	yes
MSTRG.11517	MSTRG.11517.1	4	-	23031461	23031688	228	1	Novel_lncRNA	Intergenic LncRNAs	0.57	0	-9.15482	0.0755238
MSTRG.11519	MSTRG.11519.1	4	-	23045683	23056619	8115	3	Novel_lncRNA	Antisense LncRNAs	3.39	0.95	-1.83529	3.73369e-192	yes
Os04g0461700	Os04t0461700-01	4	-	23069418	23075447	2437	3	Annotated_lncRNA	ncRNA	25.43	20.94	-0.28027	0.0408292
Os04g0461700	Os04t0461700-02	4	-	23071185	23075399	4126	2	Annotated_lncRNA	ncRNA	7.06	3.09	-1.19206	0.00879874	yes
Os04g0462700	Os04t0462700-01	4	+	23111203	23111701	499	1	Annotated_lncRNA	ncRNA	6.7	0	-12.7099	0.0199755	yes
MSTRG.11532	MSTRG.11532.1	4	-	23125252	23126013	651	2	Novel_lncRNA	Sense LncRNAs	3.76	1.59	-1.24171	8.38862e-14	yes
Os04g0464750	Os04t0464750-01	4	-	23199555	23200122	568	1	Annotated_lncRNA	ncRNA	3.88	12.68	1.70843	0.067948
MSTRG.11594	MSTRG.11594.1	4	+	23638192	23638861	670	1	Novel_lncRNA	Bidirectional LncRNAs	16.14	2.95	-2.45185	3.95942e-98	yes
MSTRG.11595	MSTRG.11595.1	4	-	23638258	23640410	2153	1	Novel_lncRNA	Bidirectional LncRNAs	46.26	42.05	-0.137659	3.2372e-145
MSTRG.11596	MSTRG.11596.1	4	+	23639989	23654065	339	2	Novel_lncRNA	Antisense LncRNAs	0	0.5	8.96578	0.0755238
MSTRG.11598	MSTRG.11598.1	4	-	23644814	23660393	2556	2	Novel_lncRNA	Others(sense updown)	1018.55	1066.04	0.0657448	0
MSTRG.11601	MSTRG.11601.1	4	+	23657891	23658151	261	1	Novel_lncRNA	Intergenic LncRNAs	0.2	0	-7.64386	0.539658
Os04g0474432	Os04t0474432-01	4	+	23727465	23731790	1001	3	Annotated_lncRNA	ncRNA	95.85	364.88	1.92857	0.0315218	yes
MSTRG.11603	MSTRG.11603.2	4	+	23727521	23733945	858	2	Novel_lncRNA	Antisense LncRNAs	1.08	0.08	-3.75489	1.43772e-11	yes
Os04g0481201	Os04t0481201-00	4	+	24069227	24069925	447	4	Annotated_lncRNA	ncRNA	2.85	0.06	-5.56986	0.0589699
Os04g0491901	Os04t0491901-00	4	+	24567746	24568882	1137	1	Annotated_lncRNA	ncRNA	35.82	24.95	-0.521726	0.00367598
Os04g0492450	Os04t0492450-00	4	-	24613960	24614468	509	1	Annotated_lncRNA	ncRNA	0.88	1.54	0.807355	0.0596494
MSTRG.11715	MSTRG.11715.1	4	-	24719614	24722602	1171	4	Novel_lncRNA	Sense LncRNAs	7.89	1.71	-2.20603	6.65247e-78	yes
Os04g0496950	Os04t0496950-01	4	+	24855428	24859074	3647	1	Annotated_lncRNA	ncRNA	1.05	0.25	-2.07039	0.095855
Os04g0497250	Os04t0497250-00	4	+	24864345	24866466	1437	3	Annotated_lncRNA	ncRNA	2.76	2.23	-0.307625	0.0640995
MSTRG.11739	MSTRG.11739.1	4	+	24905149	24905762	614	1	Novel_lncRNA	Others(anti down)	4.86	0.17	-4.83735	2.54725e-35	yes
MSTRG.11753	MSTRG.11753.1	4	+	24962093	24962296	204	1	Novel_lncRNA	Others(sense updown)	0.16	0.37	1.20945	1
Os04g0502850	Os04t0502850-00	4	-	25105443	25105913	471	1	Annotated_lncRNA	ncRNA	2.05	1.09	-0.911296	0.0767761
Os04g0504650	Os04t0504650-00	4	-	25188033	25190406	960	5	Annotated_lncRNA	ncRNA	1.95	3.02	0.631074	0.0971304
Os04g0508975	Os04t0508975-00	4	-	25455143	25458887	1595	4	Annotated_lncRNA	ncRNA	119.36	13.28	-3.16799	0.0152767	yes
MSTRG.11880	MSTRG.11880.1	4	-	26160483	26160820	338	1	Novel_lncRNA	Intergenic LncRNAs	2.1	0.23	-3.19068	6.57177e-09	yes
MSTRG.11902	MSTRG.11902.2	4	+	26387573	26391159	607	3	Novel_lncRNA	Sense LncRNAs	0.95	1.04	0.130584	0.140221
MSTRG.11913	MSTRG.11913.1	4	+	26510601	26511748	1148	1	Novel_lncRNA	Antisense LncRNAs	0.9	0.02	-5.49185	1.84666e-12	yes
Os04g0530150	Os04t0530150-01	4	-	26520000	26521605	1606	1	Annotated_lncRNA	ncRNA	3.78	6.29	0.734674	0.0249877
Os04g0537450	Os04t0537450-00	4	-	26834695	26835104	410	1	Annotated_lncRNA	ncRNA	14.33	2.44	-2.55409	0.00569231	yes
MSTRG.11965	MSTRG.11965.1	4	-	27035636	27043531	6279	5	Novel_lncRNA	Sense LncRNAs	4	2.98	-0.424688	6.66237e-64
MSTRG.11969	MSTRG.11969.1	4	+	27070114	27072136	2023	1	Novel_lncRNA	Intergenic LncRNAs	1.51	0.16	-3.2384	1.31774e-35	yes
MSTRG.11986	MSTRG.11986.1	4	+	27238720	27241146	2330	2	Novel_lncRNA	Others(sense updown),Others(sense updown)	9.05	16.15	0.835544	0.254595
Os04g0548450	Os04t0548450-00	4	+	27461142	27467245	1215	3	Annotated_lncRNA	ncRNA	581.63	348.6	-0.738529	0.00477911
Os04g0549650	Os04t0549650-00	4	-	27508883	27509736	593	3	Annotated_lncRNA	ncRNA	1.68	2.5	0.573467	0.0358168
MSTRG.12017	MSTRG.12017.1	4	-	27510418	27510805	388	1	Novel_lncRNA	Others(anti down),Others(sense updown)	5.02	2.55	-0.97719	1.31251e-09
Os04g0551400	Os04t0551400-00	4	+	27609034	27611514	1121	7	Annotated_lncRNA	ncRNA	14.28	4.43	-1.68862	0.01339	yes
MSTRG.12028	MSTRG.12028.1	4	+	27625171	27625486	316	1	Novel_lncRNA	Intergenic LncRNAs	0.62	0	-9.27612	0.0100472	yes
MSTRG.12089	MSTRG.12089.1	4	+	28284184	28285118	851	2	Novel_lncRNA	Sense LncRNAs	3.54	0.51	-2.79518	2.66068e-31	yes
Os04g0576850	Os04t0576850-00	4	-	29072739	29074430	636	3	Annotated_lncRNA	ncRNA	2.65	2.87	0.115058	0.0360879
MSTRG.12165	MSTRG.12165.1	4	+	29163356	29165144	1703	2	Novel_lncRNA	Sense LncRNAs	2.42	0	-11.2408	1.85824e-47	yes
Os04g0580450	Os04t0580450-00	4	+	29289618	29292025	399	4	Annotated_lncRNA	ncRNA	1.32	0	-10.3663	0.0725138
Os04g0583550	Os04t0583550-00	4	-	29485735	29488281	554	2	Annotated_lncRNA	ncRNA	0	2.96	11.5314	0.0136174	yes
Os04g0587451	Os04t0587451-00	4	+	29666137	29670469	837	2	Annotated_lncRNA	ncRNA	31.21	0.1	-8.28586	0.00333718	yes
MSTRG.12219	MSTRG.12219.2	4	+	29799853	29801702	591	2	Novel_lncRNA	Sense LncRNAs	9.68	13.79	0.510544	0.00510864
Os04g0596350	Os04t0596350-00	4	+	30077754	30078558	805	1	Annotated_lncRNA	ncRNA	7.9	13.55	0.778368	0.00915577
Os04g0599675	Os04t0599675-00	4	-	30249437	30253906	2106	6	Annotated_lncRNA	ncRNA	8.07	5.2	-0.634057	7.32856e-07
Os04g0603601	Os04t0603601-00	4	-	30447571	30450418	2848	1	Annotated_lncRNA	ncRNA	21.03	1.82	-3.53044	0.0192683	yes
MSTRG.12282	MSTRG.12282.1	4	+	30456569	30456803	235	1	Novel_lncRNA	Intergenic LncRNAs	18.09	4.85	-1.89914	1.42777e-32	yes
Os04g0604251	Os04t0604251-00	4	+	30482503	30483293	566	3	Annotated_lncRNA	ncRNA	3.41	1.06	-1.68571	0.0376676	yes
Os04g0606425	Os04t0606425-00	4	+	30629911	30631711	596	3	Annotated_lncRNA	ncRNA	3.8	1.11	-1.77544	0.0963683
Os04g0607250	Os04t0607250-00	4	-	30711791	30712483	693	1	Annotated_lncRNA	ncRNA	80.38	39.39	-1.02901	0.00288793	yes
Os04g0608850	Os04t0608850-00	4	-	30824029	30824837	497	3	Annotated_lncRNA	ncRNA	23.5	4.64	-2.34046	0.02333	yes
Os04g0610301	Os04t0610301-01	4	+	30934307	30934574	268	1	Annotated_lncRNA	ncRNA	28.11	9.28	-1.59889	0.0158655	yes
Os04g0611233	Os04t0611233-00	4	+	30995900	30997072	1173	1	Annotated_lncRNA	ncRNA	1.99	0.56	-1.82927	0.0747606
Os04g0613100	Os04t0613100-00	4	+	31078400	31080220	955	2	Annotated_lncRNA	ncRNA	0.42	1.89	2.16993	0.0767932
MSTRG.12373	MSTRG.12373.1	4	-	31145913	31146148	236	1	Novel_lncRNA	Intergenic LncRNAs	0	0.11	6.78136	1
Os04g0616350	Os04t0616350-00	4	+	31275367	31275831	465	1	Annotated_lncRNA	ncRNA	3.72	0.49	-2.92445	0.018508	yes
Os04g0616450	Os04t0616450-00	4	+	31286615	31287094	480	1	Annotated_lncRNA	ncRNA	3.3	0	-11.6883	0.0080527	yes
Os04g0616550	Os04t0616550-00	4	+	31300516	31300999	484	1	Annotated_lncRNA	ncRNA	13.88	1.7	-3.0294	0.0970016
Os04g0616650	Os04t0616650-00	4	+	31309584	31310066	483	1	Annotated_lncRNA	ncRNA	8.61	0.85	-3.34048	0.0812284
MSTRG.12411	MSTRG.12411.1	4	+	31429762	31430427	337	2	Novel_lncRNA	Intergenic LncRNAs	1.54	1.43	-0.106915	0.0708711
MSTRG.12414	MSTRG.12414.1	4	-	31448932	31450579	814	3	Novel_lncRNA	Antisense LncRNAs	0.56	1.96	1.80735	0.0444208	yes
Os04g0619450	Os04t0619450-00	4	+	31463444	31463727	284	1	Annotated_lncRNA	ncRNA	191.83	212.69	0.148924	0.0264465
Os04g0623901	Os04t0623901-01	4	-	31712233	31713975	1743	1	Annotated_lncRNA	ncRNA	1.1	0.42	-1.38904	0.0447721	yes
Os04g0625950	Os04t0625950-00	4	-	31828517	31828857	341	1	Annotated_lncRNA	ncRNA	1.21	0.82	-0.561311	0.00387538
Os04g0627066	Os04t0627066-00	4	+	31902189	31902672	378	2	Annotated_lncRNA	ncRNA	4.13	1.21	-1.77113	0.055025
Os04g0629850	Os04t0629850-00	4	+	32034252	32038438	2236	14	Annotated_lncRNA	ncRNA	2.09	0.44	-2.24793	0.00998675	yes
Os04g0631300	Os04t0631300-01	4	+	32150259	32150802	544	1	Annotated_lncRNA	ncRNA	1.93	0.31	-2.63826	0.0065285	yes
MSTRG.12502	MSTRG.12502.1	4	+	32152776	32154405	233	2	Novel_lncRNA	Intergenic LncRNAs	815.11	1515.28	0.894518	0.3514
MSTRG.12503	MSTRG.12503.1	4	-	32154194	32154396	203	1	Novel_lncRNA	Intergenic LncRNAs	0	0.25	7.96578	1
Os04g0632350	Os04t0632350-01	4	+	32185847	32187369	1523	1	Annotated_lncRNA	ncRNA	3.68	0.7	-2.39428	0.0541001
Os04g0633250	Os04t0633250-01	4	+	32228230	32231359	600	2	Annotated_lncRNA	ncRNA	4.64	0.33	-3.81359	0.042183	yes
Os04g0635450	Os04t0635450-00	4	+	32331657	32332138	482	1	Annotated_lncRNA	ncRNA	12.42	5.5	-1.17516	0.0399273	yes
MSTRG.12522	MSTRG.12522.1	4	-	32336707	32336921	215	1	Novel_lncRNA	Bidirectional LncRNAs	195.41	1162.72	2.57293	0	yes
Os04g0638901	Os04t0638901-00	4	+	32473520	32474170	454	2	Annotated_lncRNA	ncRNA	7.44	3.82	-0.96173	0.00898562
Os04g0640850	Os04t0640850-00	4	+	32605050	32605609	476	2	Annotated_lncRNA	ncRNA	34.44	41.54	0.270416	0.0295789
Os04g0641101	Os04t0641101-01	4	-	32619579	32619813	235	1	Annotated_lncRNA	ncRNA	1.1	2	0.862496	0.000211274
MSTRG.12591	MSTRG.12591.1	4	-	32872678	32897814	922	2	Novel_lncRNA	Intergenic LncRNAs	49.06	68.42	0.479871	2.99687e-16
MSTRG.12592	MSTRG.12592.1	4	+	32876222	32876807	586	1	Novel_lncRNA	Intergenic LncRNAs	6.03	3.85	-0.6473	6.30547e-13
MSTRG.12593	MSTRG.12593.1	4	+	32883391	32892503	9113	1	Novel_lncRNA	Antisense LncRNAs	3.87	1.63	-1.24746	3.01519e-178	yes
MSTRG.12595	MSTRG.12595.1	4	+	32893059	32897057	1018	2	Novel_lncRNA	Bidirectional LncRNAs	0.13	0.08	-0.70044	0.323678
MSTRG.12596	MSTRG.12596.1	4	-	32897983	32898457	475	1	Novel_lncRNA	Intergenic LncRNAs	77.29	47.03	-0.7167	1.13216e-122
MSTRG.12597	MSTRG.12597.1	4	-	32927294	32928720	1427	1	Novel_lncRNA	Intergenic LncRNAs	29.01	26.63	-0.123498	4.58991e-66
MSTRG.12599	MSTRG.12599.1	4	-	32928993	32929407	415	1	Novel_lncRNA	Intergenic LncRNAs	3.28	1.53	-1.10016	1.09728e-07	yes
MSTRG.12600	MSTRG.12600.1	4	+	32929003	32929371	369	1	Novel_lncRNA	Intergenic LncRNAs	2.55	0.89	-1.51862	5.16703e-07	yes
Os04g0648000	Os04t0648000-01	4	-	32963688	32967606	841	2	Annotated_lncRNA	ncRNA	6.47	0.65	-3.31525	0.0277805	yes
Os04g0648950	Os04t0648950-01	4	-	33051638	33052729	1092	1	Annotated_lncRNA	ncRNA	0	0.39	8.60733	0.00474281	yes
Os04g0651700	Os04t0651700-01	4	-	33199257	33199926	670	1	Annotated_lncRNA	ncRNA	2.77	0.59	-2.2311	0.0430006	yes
Os04g0655100	Os04t0655100-01	4	-	33415316	33415634	319	1	Annotated_lncRNA	ncRNA	4.95	4.44	-0.156869	0.000376422
Os04g0659450	Os04t0659450-00	4	-	33648127	33648694	568	1	Annotated_lncRNA	ncRNA	1.28	1.91	0.577429	0.0785042
Os04g0661950	Os04t0661950-00	4	-	33777675	33779206	595	4	Annotated_lncRNA	ncRNA	2.44	0.85	-1.52135	0.079846
Os04g0667033	Os04t0667033-00	4	+	34054332	34056607	876	4	Annotated_lncRNA	ncRNA	34.77	40.21	0.209711	0.0265492
Os04g0667850	Os04t0667850-00	4	+	34088390	34090279	467	4	Annotated_lncRNA	ncRNA	3.1	1.17	-1.40576	0.0143348	yes
Os04g0668300	Os04t0668300-01	4	-	34104471	34104969	499	1	Annotated_lncRNA	ncRNA	2.97	1.66	-0.83928	7.134e-05
Os04g0668350	Os04t0668350-01	4	+	34106650	34107001	352	1	Annotated_lncRNA	ncRNA	0.9	2.28	1.34104	0.00786496	yes
Os04g0669375	Os04t0669375-00	4	-	34138525	34141882	1554	11	Annotated_lncRNA	ncRNA	2.7	0.38	-2.82889	0.00319602	yes
Os04g0674425	Os04t0674425-00	4	-	34424625	34425583	628	5	Annotated_lncRNA	ncRNA	8.27	0	-13.0137	0.00778245	yes
Os04g0676000	Os04t0676000-00	4	-	34508740	34509223	484	1	Annotated_lncRNA	ncRNA	0.37	2.91	2.97542	0.0283772	yes
Os04g0679150	Os04t0679150-00	4	-	34680356	34680852	401	2	Annotated_lncRNA	ncRNA	0.14	6.35	5.50326	0.0501488
Os04g0679933	Os04t0679933-00	4	+	34721215	34721623	396	2	Annotated_lncRNA	ncRNA	3.86	5.41	0.487028	0.00898562
Os04g0682051	Os04t0682051-00	4	+	34821110	34822111	626	5	Annotated_lncRNA	ncRNA	2.59	4.21	0.700868	0.00473609
Os04g0683875	Os04t0683875-00	4	-	34920963	34921973	419	3	Annotated_lncRNA	ncRNA	17.45	8.73	-0.999173	0.0437012
Os04g0691433	Os04t0691433-00	4	-	35360311	35360782	472	1	Annotated_lncRNA	ncRNA	6.37	5.88	-0.115477	0.00672245
Os05g0100366	Os05t0100366-00	5	-	38788	39027	240	1	Annotated_lncRNA	ncRNA	17.56	14.69	-0.257458	0.00371948
Os05g0101800	Os05t0101800-00	5	-	113235	113499	265	1	Annotated_lncRNA	ncRNA	0.67	0.58	-0.208108	0.0746444
Os05g0105150	Os05t0105150-00	5	-	285059	287051	685	2	Annotated_lncRNA	ncRNA	3.27	1.83	-0.837447	0.062267
Os05g0105550	Os05t0105550-00	5	-	301690	303708	491	3	Annotated_lncRNA	ncRNA	3.01	0.51	-2.56119	0.0969887
MSTRG.12972	MSTRG.12972.1	5	+	312435	313673	883	4	Novel_lncRNA	Sense LncRNAs	4.22	7.95	0.913712	1
Os05g0115950	Os05t0115950-00	5	+	865291	868831	906	5	Annotated_lncRNA	ncRNA	2.76	12.49	2.17803	0.0601999
Os05g0125250	Os05t0125250-01	5	-	1460830	1461749	817	2	Annotated_lncRNA	ncRNA	2.07	0	-11.0154	0.0244795	yes
Os05g0125450	Os05t0125450-00	5	+	1470125	1472594	779	8	Annotated_lncRNA	ncRNA	33.19	8.9	-1.89887	0.0602683
Os05g0126150	Os05t0126150-00	5	-	1494328	1495571	948	2	Annotated_lncRNA	ncRNA	13.84	20.36	0.556894	0.0481498
Os05g0127266	Os05t0127266-00	5	-	1540430	1541246	505	2	Annotated_lncRNA	ncRNA	1.14	0	-10.1548	0.00677951	yes
Os05g0127450	Os05t0127450-00	5	-	1553622	1557016	971	3	Annotated_lncRNA	ncRNA	2.04	0.43	-2.24616	0.09299
MSTRG.13134	MSTRG.13134.1	5	-	2107444	2107663	220	1	Novel_lncRNA	Intergenic LncRNAs	7.37	19	1.36626	0.0852642
MSTRG.13195	MSTRG.13195.1	5	-	2748512	2752887	3248	4	Novel_lncRNA	Sense LncRNAs	3.53	0.51	-2.7911	1.48866e-115	yes
MSTRG.13195	MSTRG.13195.2	5	-	2748512	2752887	3577	6	Novel_lncRNA	Sense LncRNAs	4.47	0.52	-3.10369	4.50154e-172	yes
MSTRG.13195	MSTRG.13195.4	5	-	2749723	2752887	2716	5	Novel_lncRNA	Sense LncRNAs	2.7	0.44	-2.61738	4.51347e-71	yes
Os05g0149850	Os05t0149850-00	5	-	2849409	2851396	814	4	Annotated_lncRNA	ncRNA	3.02	0.51	-2.56598	0.0827929
MSTRG.13226	MSTRG.13226.2	5	+	2987598	2989800	489	3	Novel_lncRNA	Sense LncRNAs	2.1	1.55	-0.438121	0.000703715
MSTRG.13227	MSTRG.13227.1	5	-	3008647	3012723	2920	2	Novel_lncRNA	Sense LncRNAs	22.49	29.8	0.406029	1.31391e-28
MSTRG.13228	MSTRG.13228.1	5	+	3010786	3011016	231	1	Novel_lncRNA	Antisense LncRNAs	0	0.11	6.78136	1
Os05g0152366	Os05t0152366-00	5	-	3010795	3011863	947	3	Annotated_lncRNA	ncRNA	18.87	4.66	-2.01769	0.014293	yes
MSTRG.13233	MSTRG.13233.1	5	+	3096351	3096552	202	1	Novel_lncRNA	Antisense LncRNAs	2.64	4.23	0.68012	0.698457
Os05g0155450	Os05t0155450-00	5	+	3245999	3246383	385	1	Annotated_lncRNA	ncRNA	21.9	3.37	-2.70011	0.0389476	yes
Os05g0161100	Os05t0161100-01	5	-	3606451	3606838	388	1	Annotated_lncRNA	ncRNA	4.81	6.47	0.427729	0.0386647
Os05g0163200	Os05t0163200-01	5	-	3704404	3704671	268	1	Annotated_lncRNA	ncRNA	42.02	65.5	0.640419	0.0278975
MSTRG.13303	MSTRG.13303.1	5	-	3976909	3977199	291	1	Novel_lncRNA	Intergenic LncRNAs	1.11	0.35	-1.66513	0.00550112	yes
MSTRG.13304	MSTRG.13304.1	5	-	3985968	3986199	232	1	Novel_lncRNA	Intergenic LncRNAs	337.57	4.26	-6.30819	0	yes
MSTRG.13305	MSTRG.13305.1	5	-	3986799	3987048	250	1	Novel_lncRNA	Intergenic LncRNAs	17.13	18.55	0.114894	5.43383e-06
MSTRG.13306	MSTRG.13306.1	5	-	4088271	4088661	391	1	Novel_lncRNA	Intergenic LncRNAs	1.91	0.06	-4.99247	6.57177e-09	yes
Os05g0176050	Os05t0176050-00	5	-	4560441	4562256	424	3	Annotated_lncRNA	ncRNA	0.43	1.44	1.74366	0.0437414	yes
MSTRG.13353	MSTRG.13353.1	5	+	4660048	4660308	261	1	Novel_lncRNA	Others(anti down)	0	0.19	7.56986	1
MSTRG.13378	MSTRG.13378.1	5	-	4922557	4926368	3812	1	Novel_lncRNA	Bidirectional LncRNAs	1.7	0.51	-1.73697	1.64482e-46	yes
Os05g0185525	Os05t0185525-00	5	-	5238127	5239023	897	1	Annotated_lncRNA	ncRNA	2.51	0.11	-4.51211	0.000690082	yes
Os05g0191800	Os05t0191800-00	5	+	5640669	5641007	339	1	Annotated_lncRNA	ncRNA	1.23	0	-10.2644	0.0123919	yes
Os05g0195000	Os05t0195000-01	5	+	5818086	5821365	570	3	Annotated_lncRNA	ncRNA	18.55	84.29	2.18394	0.00178136	yes
Os05g0199700	Os05t0199700-01	5	-	6198379	6200786	1977	2	Annotated_lncRNA	ncRNA	150.71	61.77	-1.2868	0.0985569
Os05g0204950	Os05t0204950-00	5	-	6536386	6537279	388	3	Annotated_lncRNA	ncRNA	8.46	1.11	-2.9301	0.0877473
Os05g0206600	Os05t0206600-00	5	-	6606005	6606262	258	1	Annotated_lncRNA	ncRNA	1.84	0.93	-0.984403	0.00403091
Os05g0212250	Os05t0212250-00	5	+	6937304	6938426	956	3	Annotated_lncRNA	ncRNA	5.49	3.13	-0.810643	0.0673258
MSTRG.13489	MSTRG.13489.1	5	-	6951560	6952159	600	1	Novel_lncRNA	Intergenic LncRNAs	2.05	3.59	0.80836	0.748324
Os05g0218663	Os05t0218663-00	5	+	7279447	7282669	1131	7	Annotated_lncRNA	ncRNA	118.7	54.97	-1.1106	0.0704192
Os05g0229000	Os05t0229000-00	5	-	7848218	7848915	698	1	Annotated_lncRNA	ncRNA	11.43	2.42	-2.23975	0.0100677	yes
Os05g0232566	Os05t0232566-00	5	-	8038258	8039010	520	2	Annotated_lncRNA	ncRNA	4.83	7.48	0.631015	0.0759794
MSTRG.13544	MSTRG.13544.1	5	-	8107374	8108272	812	2	Novel_lncRNA	Intergenic LncRNAs	1.52	0	-10.5699	1.55334e-14	yes
Os05g0239900	Os05t0239900-01	5	+	8499986	8504483	2027	4	Annotated_lncRNA	ncRNA	1.99	4.85	1.28522	0.00364088	yes
Os05g0252701	Os05t0252701-00	5	+	9295182	9295553	372	1	Annotated_lncRNA	ncRNA	2.63	3.18	0.273964	0.00281404
Os05g0253301	Os05t0253301-00	5	-	9327251	9327740	490	1	Annotated_lncRNA	ncRNA	1.31	0.66	-0.989029	0.00494801
Os05g0256250	Os05t0256250-00	5	-	9472588	9473098	511	1	Annotated_lncRNA	ncRNA	1.53	0.49	-1.64268	0.0643418
Os05g0256801	Os05t0256801-00	5	-	9526586	9527091	506	1	Annotated_lncRNA	ncRNA	4.71	1.62	-1.53973	0.00898562	yes
Os05g0261001	Os05t0261001-00	5	+	10113038	10113510	473	1	Annotated_lncRNA	ncRNA	13.21	3.71	-1.83214	0.00898562	yes
Os05g0263500	Os05t0263500-01	5	-	10266529	10269309	1424	3	Annotated_lncRNA	ncRNA	4.68	22.97	2.29517	0.00107232	yes
MSTRG.13625	MSTRG.13625.1	5	-	11459841	11460144	304	1	Novel_lncRNA	Intergenic LncRNAs	2.88	0	-11.4919	4.36792e-10	yes
MSTRG.13627	MSTRG.13627.1	5	+	11602895	11603269	375	1	Novel_lncRNA	Intergenic LncRNAs	7.47	1.04	-2.84452	6.30637e-30	yes
MSTRG.13638	MSTRG.13638.1	5	+	12050916	12052723	341	2	Novel_lncRNA	Sense LncRNAs	1.67	0.52	-1.68326	7.20991e-05	yes
MSTRG.13641	MSTRG.13641.1	5	+	12326139	12327317	1179	1	Novel_lncRNA	Intergenic LncRNAs	3.19	0.11	-4.85798	3.25174e-44	yes
MSTRG.13648	MSTRG.13648.2	5	+	12887842	12891765	3894	2	Novel_lncRNA	Antisense LncRNAs	1.05	0.31	-1.76005	9.84033e-30	yes
MSTRG.13648	MSTRG.13648.1	5	+	12887842	12891865	4024	1	Novel_lncRNA	Antisense LncRNAs	13.92	13.13	-0.0842923	2.311e-83
MSTRG.13653	MSTRG.13653.1	5	-	12959579	12961571	1217	2	Novel_lncRNA	Intergenic LncRNAs	0.39	182.93	8.8736	0	yes
MSTRG.13653	MSTRG.13653.2	5	-	12959615	12961579	1965	1	Novel_lncRNA	Intergenic LncRNAs	0.08	2.53	4.98299	1.25678e-21	yes
MSTRG.13654	MSTRG.13654.1	5	+	12959941	12985395	1281	3	Novel_lncRNA	Others(sense updown)	462.7	92.7	-2.31944	0	yes
MSTRG.13655	MSTRG.13655.1	5	-	12975741	12975970	230	1	Novel_lncRNA	Bidirectional LncRNAs	0	15.66	13.9348	4.77672e-22	yes
MSTRG.13656	MSTRG.13656.1	5	-	12978173	12979505	1333	1	Novel_lncRNA	Intergenic LncRNAs	1.2	0.76	-0.658963	1.3645e-06
MSTRG.13658	MSTRG.13658.1	5	-	12984177	12984678	502	1	Novel_lncRNA	Intergenic LncRNAs	8.98	15.75	0.810564	0.537538
MSTRG.13659	MSTRG.13659.1	5	-	12985008	12985332	325	1	Novel_lncRNA	Intergenic LncRNAs	8.78	15.98	0.863975	0.847128
MSTRG.13661	MSTRG.13661.1	5	+	12994010	12997507	2006	7	Novel_lncRNA	Intergenic LncRNAs	2.2	0.23	-3.2578	4.41578e-50	yes
Os05g0295500	Os05t0295500-00	5	+	13064243	13064968	726	1	Annotated_lncRNA	ncRNA	11.71	0.74	-3.98407	0.0113754	yes
Os05g0296530	Os05t0296530-00	5	-	13187374	13187922	549	1	Annotated_lncRNA	ncRNA	2.9	2.26	-0.35973	0.0573971
Os05g0296600	Os05t0296600-01	5	+	13187911	13188220	310	1	Annotated_lncRNA	ncRNA	6.92	0.75	-3.20581	0.0292195	yes
Os05g0297600	Os05t0297600-00	5	+	13274507	13275130	624	1	Annotated_lncRNA	ncRNA	27.52	13.65	-1.01158	0.00932204	yes
MSTRG.13679	MSTRG.13679.1	5	-	13320168	13322182	842	2	Novel_lncRNA	Intergenic LncRNAs	3.09	0.45	-2.77961	1.66656e-26	yes
MSTRG.13679	MSTRG.13679.2	5	-	13320168	13320953	688	2	Novel_lncRNA	Intergenic LncRNAs	3.29	0.67	-2.29585	5.80032e-21	yes
MSTRG.13685	MSTRG.13685.1	5	-	13414112	13414425	314	1	Novel_lncRNA	Others(sense updown)	2.17	0.65	-1.73918	7.22897e-06	yes
MSTRG.13688	MSTRG.13688.1	5	+	13489861	13492130	1773	2	Novel_lncRNA	Intergenic LncRNAs	1.95	0.97	-1.00742	1.20443e-16	yes
MSTRG.13711	MSTRG.13711.1	5	-	13791123	13791648	526	1	Novel_lncRNA	Intergenic LncRNAs	1.16	0.08	-3.85798	1.01078e-07	yes
Os05g0316166	Os05t0316166-00	5	+	14601209	14601585	377	1	Annotated_lncRNA	ncRNA	0.81	0	-9.66178	0.00713397	yes
MSTRG.13743	MSTRG.13743.1	5	-	14646597	14647513	917	1	Novel_lncRNA	Intergenic LncRNAs	0.04	1.77	5.46761	1.35132e-08	yes
MSTRG.13765	MSTRG.13765.1	5	-	15006215	15007309	866	2	Novel_lncRNA	Sense LncRNAs	1.2	0.85	-0.4975	0.000379947
MSTRG.13792	MSTRG.13792.1	5	-	15719354	15721747	2394	1	Novel_lncRNA	Intergenic LncRNAs	2.32	0.12	-4.27302	8.88247e-66	yes
MSTRG.13794	MSTRG.13794.1	5	-	15775700	15778750	1700	4	Novel_lncRNA	Sense LncRNAs	5.72	2.01	-1.50882	1.03345e-60	yes
Os05g0338132	Os05t0338132-00	5	-	15791610	15791828	219	1	Annotated_lncRNA	ncRNA	13.42	7.8	-0.782839	0.0663847
MSTRG.13801	MSTRG.13801.1	5	+	16015585	16015853	269	1	Novel_lncRNA	Antisense LncRNAs	0.36	1.04	1.53051	0.81464
MSTRG.13808	MSTRG.13808.1	5	+	16178925	16179263	339	1	Novel_lncRNA	Antisense LncRNAs	0	2.02	10.9801	5.88285e-05	yes
MSTRG.13831	MSTRG.13831.1	5	+	16659703	16660033	331	1	Novel_lncRNA	Intergenic LncRNAs	2.16	0.54	-2	2.23591e-06	yes
MSTRG.13860	MSTRG.13860.1	5	-	17118744	17121408	1968	3	Novel_lncRNA	Intergenic LncRNAs	3.79	3.44	-0.139789	2.5153e-14
Os05g0363533	Os05t0363533-00	5	+	17364090	17364800	508	2	Annotated_lncRNA	ncRNA	1.45	1.95	0.427421	0.00345029
Os05g0364300	Os05t0364300-01	5	-	17432967	17433661	602	2	Annotated_lncRNA	ncRNA	5.53	1.11	-2.31672	0.0673187
Os05g0368000	Os05t0368000-00	5	+	17670727	17671568	434	2	Annotated_lncRNA	ncRNA	0.28	0.72	1.36257	0.080783
Os05g0371133	Os05t0371133-00	5	-	17852931	17853588	658	1	Annotated_lncRNA	ncRNA	0	1.84	10.8455	0.00447101	yes
Os05g0371166	Os05t0371166-01	5	-	17854886	17855281	396	1	Annotated_lncRNA	ncRNA	19.12	1.12	-4.09351	0.0348878	yes
MSTRG.13907	MSTRG.13907.1	5	-	17880820	17882234	681	3	Novel_lncRNA	Sense LncRNAs	12.1	14.99	0.308993	1.00839e-06
MSTRG.13930	MSTRG.13930.1	5	-	18293196	18294504	821	3	Novel_lncRNA	Intergenic LncRNAs	1.58	2.22	0.490635	0.201706
MSTRG.13931	MSTRG.13931.1	5	-	18307180	18307992	325	3	Novel_lncRNA	Intergenic LncRNAs	1.5	1.25	-0.263034	0.0530066
MSTRG.13934	MSTRG.13934.1	5	-	18370291	18371184	894	1	Novel_lncRNA	Antisense LncRNAs	0.76	4.21	2.46975	1.24737e-06	yes
MSTRG.13937	MSTRG.13937.1	5	+	18383597	18385697	923	3	Novel_lncRNA	Sense LncRNAs	1.86	1.43	-0.379287	2.0588e-05
MSTRG.13945	MSTRG.13945.2	5	-	18503095	18505809	1363	4	Novel_lncRNA	Sense LncRNAs	1.13	0.19	-2.57225	3.00398e-15	yes
Os05g0383150	Os05t0383150-00	5	+	18508834	18512433	1341	7	Annotated_lncRNA	ncRNA	3.15	0.78	-2.01381	0.0765947
MSTRG.13953	MSTRG.13953.2	5	+	18720447	18724598	3283	3	Novel_lncRNA	Antisense LncRNAs	2.98	0.47	-2.66458	1.26026e-95	yes
Os05g0388550	Os05t0388550-00	5	-	18793318	18793662	345	1	Annotated_lncRNA	ncRNA	1.84	0.33	-2.47917	0.0550335
Os05g0395025	Os05t0395025-01	5	+	19223908	19224503	596	1	Annotated_lncRNA	ncRNA	6.42	4.18	-0.61907	0.090182
MSTRG.14002	MSTRG.14002.1	5	-	19325539	19325771	233	1	Novel_lncRNA	Antisense LncRNAs	1.11	0.22	-2.33498	0.00826666	yes
Os05g0401050	Os05t0401050-00	5	-	19503259	19504885	380	2	Annotated_lncRNA	ncRNA	2.14	0.67	-1.67538	0.0422888	yes
MSTRG.14042	MSTRG.14042.1	5	+	19688950	19689177	228	1	Novel_lncRNA	Intergenic LncRNAs	2.82	7.58	1.4265	0.245425
MSTRG.14043	MSTRG.14043.1	5	+	19689519	19689744	226	1	Novel_lncRNA	Intergenic LncRNAs	1.36	0.23	-2.5639	0.00247445	yes
MSTRG.14059	MSTRG.14059.2	5	+	19837796	19838522	727	1	Novel_lncRNA	Sense LncRNAs	46.54	0.24	-7.59929	0	yes
Os05g0409050	Os05t0409050-00	5	+	19969131	19973495	2259	2	Annotated_lncRNA	ncRNA	3.13	2.64	-0.245625	0.0465692
MSTRG.14137	MSTRG.14137.2	5	+	20738741	20740940	397	4	Novel_lncRNA	Sense LncRNAs	0.85	1.16	0.44859	0.482683
MSTRG.14192	MSTRG.14192.1	5	+	21321206	21321704	499	1	Novel_lncRNA	Bidirectional LncRNAs	2.86	4.16	0.540568	0.227825
MSTRG.14206	MSTRG.14206.1	5	-	21450931	21453889	2959	1	Novel_lncRNA	Intergenic LncRNAs	50.07	12.47	-2.00548	0	yes
MSTRG.14230	MSTRG.14230.2	5	+	21613710	21616111	1465	4	Novel_lncRNA	Sense LncRNAs	4.14	3.96	-0.0641303	8.83241e-11
MSTRG.14237	MSTRG.14237.1	5	-	21708483	21711661	2626	3	Novel_lncRNA	Sense LncRNAs	1.36	0.94	-0.532874	8.00596e-12
MSTRG.14263	MSTRG.14263.1	5	-	22001743	22002394	652	1	Novel_lncRNA	Intergenic LncRNAs	0.1	1.44	3.848	0.000459956	yes
MSTRG.14281	MSTRG.14281.1	5	+	22198549	22198789	241	1	Novel_lncRNA	Intronic LncRNAs	5.25	7.89	0.587708	0.321128
Os05g0460350	Os05t0460350-00	5	-	22615917	22620088	900	6	Annotated_lncRNA	ncRNA	2.6	0.52	-2.32193	0.0742223
Os05g0466000	Os05t0466000-01	5	+	22870780	22873087	1830	3	Annotated_lncRNA	ncRNA	18.15	8.02	-1.1783	0.00105321	yes
Os05g0466700	Os05t0466700-01	5	-	22904354	22904819	466	1	Annotated_lncRNA	ncRNA	18.44	24.77	0.425755	0.0896818
MSTRG.14370	MSTRG.14370.1	5	+	23096797	23100173	3269	2	Novel_lncRNA	Sense LncRNAs	2.83	0.29	-3.28668	1.59408e-105	yes
Os05g0472250	Os05t0472250-00	5	+	23190988	23194773	1932	8	Annotated_lncRNA	ncRNA	1.58	0.24	-2.71882	0.0061381	yes
Os05g0476250	Os05t0476250-00	5	-	23422895	23423320	426	1	Annotated_lncRNA	ncRNA	1.73	1.37	-0.336596	0.00647611
Os05g0481250	Os05t0481250-00	5	-	23660500	23661591	718	4	Annotated_lncRNA	ncRNA	2.66	10.56	1.98911	0.034076	yes
Os05g0489301	Os05t0489301-00	5	-	24046233	24046659	427	1	Annotated_lncRNA	ncRNA	6.96	8.27	0.2488	0.00470821
Os05g0495250	Os05t0495250-00	5	-	24323478	24323891	414	1	Annotated_lncRNA	ncRNA	9.95	8.85	-0.169019	0.0490745
MSTRG.14513	MSTRG.14513.1	5	-	24492285	24492900	616	1	Novel_lncRNA	Intergenic LncRNAs	1.63	0.33	-2.30433	1.59149e-09	yes
Os05g0502101	Os05t0502101-00	5	-	24715439	24716516	647	2	Annotated_lncRNA	ncRNA	0	2.49	11.2819	0.0123288	yes
Os05g0503500	Os05t0503500-00	5	+	24783622	24784068	447	1	Annotated_lncRNA	ncRNA	10.15	3.13	-1.69725	0.00990448	yes
Os05g0503650	Os05t0503650-01	5	-	24784943	24785394	452	1	Annotated_lncRNA	ncRNA	96.55	60.49	-0.67458	9.76037e-08
MSTRG.14557	MSTRG.14557.1	5	-	24881482	24881741	260	1	Novel_lncRNA	Intergenic LncRNAs	2.75	0.19	-3.85536	6.57177e-09	yes
MSTRG.14564	MSTRG.14564.1	5	+	25052530	25054003	474	3	Novel_lncRNA	Intergenic LncRNAs	1.92	0.27	-2.83007	5.34095e-10	yes
Os05g0514350	Os05t0514350-01	5	-	25503077	25503453	377	1	Annotated_lncRNA	ncRNA	4.85	4.89	0.0118497	0.03518
MSTRG.14682	MSTRG.14682.1	5	-	26274440	26276353	1914	1	Novel_lncRNA	Antisense LncRNAs	8.07	12.03	0.575996	9.3997e-05
MSTRG.14682	MSTRG.14682.2	5	-	26274951	26276353	325	2	Novel_lncRNA	Antisense LncRNAs	0	1.87	10.8688	0.000209179	yes
Os05g0528701	Os05t0528701-01	5	+	26274953	26276361	1409	1	Annotated_lncRNA	ncRNA	8.12	0.32	-4.66534	0.012818	yes
Os05g0530600	Os05t0530600-00	5	+	26347379	26351467	1742	11	Annotated_lncRNA	ncRNA	1.09	0	-10.0901	0.0421886	yes
Os05g0535566	Os05t0535566-00	5	+	26596694	26601564	1925	10	Annotated_lncRNA	ncRNA	193.88	201.04	0.0523186	0.0599946
Os05g0539750	Os05t0539750-00	5	+	26809611	26811228	828	5	Annotated_lncRNA	ncRNA	5.64	6.66	0.239827	0.0347052
Os05g0540350	Os05t0540350-00	5	+	26839007	26839798	348	2	Annotated_lncRNA	ncRNA	0.89	0	-9.79766	0.00569231	yes
Os05g0541250	Os05t0541250-00	5	-	26868480	26868848	369	1	Annotated_lncRNA	ncRNA	0.23	1.65	2.84276	0.0263552	yes
Os05g0548950	Os05t0548950-00	5	+	27229694	27232216	1368	9	Annotated_lncRNA	ncRNA	1.31	1.59	0.27946	0.00300425
Os05g0549050	Os05t0549050-01	5	+	27239805	27243217	3413	1	Annotated_lncRNA	ncRNA	0	3.3	11.6883	0.00249417	yes
Os05g0554450	Os05t0554450-00	5	-	27553199	27558062	1288	10	Annotated_lncRNA	ncRNA	6.8	3.66	-0.893691	0.0646553
Os05g0555900	Os05t0555900-01	5	+	27642436	27642713	278	1	Annotated_lncRNA	ncRNA	15.65	7.48	-1.06505	0.0972874
Os05g0566450	Os05t0566450-00	5	+	28190338	28192738	1111	6	Annotated_lncRNA	ncRNA	12.96	4.81	-1.42996	0.0491749	yes
Os05g0581000	Os05t0581000-01	5	-	28909583	28910714	1132	1	Annotated_lncRNA	ncRNA	93.4	672.24	2.84748	0.000959992	yes
MSTRG.15022	MSTRG.15022.1	5	+	29092416	29094210	1713	2	Novel_lncRNA	Antisense LncRNAs	15.06	26.97	0.840634	0.237842
Os05g0585450	Os05t0585450-01	5	-	29137807	29139454	1648	1	Annotated_lncRNA	ncRNA	8.21	40.57	2.30496	0.0385387	yes
Os05g0591925	Os05t0591925-00	5	+	29487115	29487459	345	1	Annotated_lncRNA	ncRNA	1.91	0.1	-4.2555	0.00121677	yes
Os05g0594001	Os05t0594001-00	5	+	29583709	29584308	600	1	Annotated_lncRNA	ncRNA	2.32	10.02	2.11069	0.0247845	yes
Os05g0594750	Os05t0594750-00	5	-	29609622	29613537	1396	7	Annotated_lncRNA	ncRNA	1.46	0.33	-2.14543	0.0759797
MSTRG.15094	MSTRG.15094.1	5	+	29690618	29692165	900	2	Novel_lncRNA	Others(sense updown),Others(anti down)	1.05	1.15	0.131245	0.0618862
MSTRG.15100	MSTRG.15100.1	6	+	34032	41094	2876	6	Novel_lncRNA	Intergenic LncRNAs	4.08	0.33	-3.62803	1.25346e-140	yes
Os06g0104050	Os06t0104050-00	6	+	277318	281892	1901	12	Annotated_lncRNA	ncRNA	6.44	55.86	3.11668	0.04715	yes
Os06g0104350	Os06t0104350-00	6	+	298782	300960	1237	4	Annotated_lncRNA	ncRNA	3.41	6.94	1.02516	0.0399262	yes
MSTRG.15140	MSTRG.15140.1	6	+	450588	450804	217	1	Novel_lncRNA	Others(sense updown)	0.15	0	-7.22882	1
MSTRG.15202	MSTRG.15202.1	6	+	1002381	1003268	888	1	Novel_lncRNA	Others(anti down)	1.35	0	-10.3987	6.10845e-14	yes
MSTRG.15213	MSTRG.15213.1	6	+	1095541	1095900	360	1	Novel_lncRNA	Others(anti down)	24.23	12.48	-0.957176	4.89533e-39
MSTRG.15220	MSTRG.15220.1	6	+	1185309	1186298	990	1	Novel_lncRNA	Intergenic LncRNAs	16.3	0.49	-5.05595	1.55145e-186	yes
MSTRG.15224	MSTRG.15224.1	6	+	1211902	1213140	1128	2	Novel_lncRNA	Intergenic LncRNAs	3.28	0.52	-2.65711	5.89133e-37	yes
MSTRG.15239	MSTRG.15239.1	6	+	1409588	1410054	467	1	Novel_lncRNA	Intergenic LncRNAs	1.18	1.68	0.509674	0.408405
MSTRG.15308	MSTRG.15308.1	6	+	1880537	1890909	2168	5	Novel_lncRNA	Sense LncRNAs	7.81	0.79	-3.3054	1.3663e-190	yes
Os06g0136650	Os06t0136650-00	6	+	1934052	1934465	261	3	Annotated_lncRNA	ncRNA	5.25	0.88	-2.57674	0.0065285	yes
Os06g0142550	Os06t0142550-00	6	-	2231653	2233724	390	2	Annotated_lncRNA	ncRNA	3.82	11.72	1.61733	0.0965402
Os06g0143650	Os06t0143650-00	6	+	2286306	2289497	1447	4	Annotated_lncRNA	ncRNA	2.54	0.33	-2.94429	0.031246	yes
Os06g0143950	Os06t0143950-00	6	+	2327617	2329175	534	3	Annotated_lncRNA	ncRNA	7793.23	160.45	-5.60203	0.0427693	yes
Os06g0163350	Os06t0163350-00	6	-	3196766	3197360	595	1	Annotated_lncRNA	ncRNA	8.34	7.51	-0.151234	2.09065e-05
Os06g0163701	Os06t0163701-01	6	-	3234522	3235262	401	2	Annotated_lncRNA	ncRNA	9.32	6.62	-0.493499	0.0932359
Os06g0167125	Os06t0167125-00	6	-	3385199	3386449	531	2	Annotated_lncRNA	ncRNA	0.29	0.74	1.35147	0.00179323	yes
MSTRG.15515	MSTRG.15515.1	6	+	3497053	3497291	239	1	Novel_lncRNA	Intergenic LncRNAs	0.76	0.55	-0.466568	0.259001
MSTRG.15575	MSTRG.15575.1	6	-	4006334	4006606	273	1	Novel_lncRNA	Intergenic LncRNAs	0.75	0.47	-0.67423	0.171882
Os06g0182800	Os06t0182800-00	6	-	4095430	4100628	1459	10	Annotated_lncRNA	ncRNA	0.21	2.43	3.5325	0.0545609
MSTRG.15584	MSTRG.15584.1	6	-	4130507	4130993	487	1	Novel_lncRNA	Intergenic LncRNAs	16.86	16.78	-0.00686182	1.02041e-12
Os06g0186650	Os06t0186650-00	6	+	4371048	4376238	1894	6	Annotated_lncRNA	ncRNA	4.91	1.28	-1.93958	0.0231499	yes
MSTRG.15611	MSTRG.15611.1	6	-	4451722	4452089	368	1	Novel_lncRNA	Intergenic LncRNAs	1.23	0.14	-3.13516	5.91088e-06	yes
Os06g0188500	Os06t0188500-01	6	-	4463932	4467534	2272	6	Annotated_lncRNA	ncRNA	0.98	0.03	-5.02975	0.00331105	yes
Os06g0192650	Os06t0192650-00	6	-	4669544	4670449	784	2	Annotated_lncRNA	ncRNA	16.15	5.12	-1.65732	0.0317845	yes
Os06g0199601	Os06t0199601-00	6	+	5055431	5055953	464	2	Annotated_lncRNA	ncRNA	2.9	0	-11.5018	0.0451245	yes
Os06g0202825	Os06t0202825-00	6	+	5186648	5187993	1044	3	Annotated_lncRNA	ncRNA	1.16	0.23	-2.33442	0.00249749	yes
Os06g0203550	Os06t0203550-01	6	-	5222444	5227791	5348	1	Annotated_lncRNA	ncRNA	1.08	0.3	-1.848	0.00528717	yes
Os06g0207916	Os06t0207916-01	6	-	5498604	5502946	236	2	Annotated_lncRNA	ncRNA	4.37	19.85	2.18343	0.0158655	yes
MSTRG.15693	MSTRG.15693.1	6	+	5518202	5518547	346	1	Novel_lncRNA	Others(anti down)	13.31	3.59	-1.89045	1.16588e-35	yes
MSTRG.15698	MSTRG.15698.1	6	-	5563256	5563479	224	1	Novel_lncRNA	Others(anti down)	2.9	0.57	-2.34702	2.58108e-06	yes
Os06g0209500	Os06t0209500-01	6	+	5589287	5594728	410	2	Annotated_lncRNA	ncRNA	0	4.88	12.2527	0.0418353	yes
Os06g0215925	Os06t0215925-00	6	+	5895037	5896223	1063	2	Annotated_lncRNA	ncRNA	13.34	2.54	-2.39286	0.0658035
Os06g0216250	Os06t0216250-00	6	+	5913097	5914255	1056	2	Annotated_lncRNA	ncRNA	2.87	0.41	-2.80735	0.0592132
Os06g0223900	Os06t0223900-01	6	-	6411438	6412728	804	2	Annotated_lncRNA	ncRNA	35.83	3.8	-3.2371	0.00775398	yes
Os06g0227300	Os06t0227300-01	6	-	6605490	6605889	400	1	Annotated_lncRNA	ncRNA	2.73	2.4	-0.185867	1.41047e-05
Os06g0230301	Os06t0230301-00	6	-	6761857	6762678	654	2	Annotated_lncRNA	ncRNA	6.01	3.27	-0.878074	0.0855422
MSTRG.15789	MSTRG.15789.1	6	-	6784705	6784936	232	1	Novel_lncRNA	Intergenic LncRNAs	0.14	0.22	0.652077	1
MSTRG.15790	MSTRG.15790.1	6	-	6785428	6785655	228	1	Novel_lncRNA	Intergenic LncRNAs	0.14	0.33	1.23704	1
MSTRG.15791	MSTRG.15791.1	6	-	6786534	6786813	280	1	Novel_lncRNA	Bidirectional LncRNAs	0.46	0	-8.84549	0.0755238
Os06g0232650	Os06t0232650-01	6	+	6892726	6895644	1198	6	Annotated_lncRNA	ncRNA	4.93	0.99	-2.31609	0.0206459	yes
Os06g0233451	Os06t0233451-00	6	-	6934457	6935495	504	2	Annotated_lncRNA	ncRNA	2.74	14.71	2.42455	0.091987
MSTRG.15835	MSTRG.15835.1	6	-	7086668	7088509	296	2	Novel_lncRNA	Sense LncRNAs	2.5	1.69	-0.564905	0.00259912
Os06g0243100	Os06t0243100-01	6	+	7422540	7433115	593	3	Annotated_lncRNA	ncRNA	4.24	1.07	-1.98645	0.0919116
Os06g0247101	Os06t0247101-00	6	-	7629754	7630787	1034	1	Annotated_lncRNA	ncRNA	11.34	6.03	-0.911191	0.00330031
Os06g0247850	Os06t0247850-00	6	-	7667912	7669737	734	5	Annotated_lncRNA	ncRNA	11.66	1.33	-3.13207	0.024413	yes
Os06g0254901	Os06t0254901-00	6	-	8029753	8030718	739	2	Annotated_lncRNA	ncRNA	3.9	0.25	-3.96347	0.0367475	yes
Os06g0255001	Os06t0255001-00	6	+	8034209	8035027	819	1	Annotated_lncRNA	ncRNA	1.7	0.21	-3.01707	0.00856063	yes
Os06g0259901	Os06t0259901-00	6	-	8372480	8372883	404	1	Annotated_lncRNA	ncRNA	5.07	3.58	-0.502026	0.00437878
Os06g0265950	Os06t0265950-01	6	-	8824430	8825030	601	1	Annotated_lncRNA	ncRNA	5.22	2.94	-0.828234	0.00069777
Os06g0268600	Os06t0268600-01	6	+	8939510	8941619	2110	1	Annotated_lncRNA	ncRNA	2.68	0	-11.388	9.99653e-08	yes
MSTRG.15941	MSTRG.15941.1	6	+	8939510	8941945	271	3	Novel_lncRNA	Sense LncRNAs	20.11	0.09	-7.80377	7.82642e-63	yes
Os06g0268900	Os06t0268900-01	6	-	8965743	8966247	505	1	Annotated_lncRNA	ncRNA	4.04	0.52	-2.95777	0.00158649	yes
Os06g0274550	Os06t0274550-00	6	-	9319211	9321413	494	2	Annotated_lncRNA	ncRNA	2.15	4.66	1.11599	0.0617633
Os06g0274600	Os06t0274600-01	6	+	9319466	9320505	1040	1	Annotated_lncRNA	ncRNA	26.77	8.76	-1.61161	0.0101761	yes
MSTRG.15969	MSTRG.15969.1	6	-	9350098	9350299	202	1	Novel_lncRNA	Intergenic LncRNAs	0.32	0	-8.32193	0.281469
Os06g0278150	Os06t0278150-00	6	+	9564390	9566663	1061	5	Annotated_lncRNA	ncRNA	0.55	1.69	1.61952	0.0480823	yes
MSTRG.15982	MSTRG.15982.2	6	+	9634226	9636642	1157	3	Novel_lncRNA	Sense LncRNAs	2.61	0.13	-4.32747	6.58256e-36	yes
MSTRG.15997	MSTRG.15997.1	6	+	10372202	10374893	670	3	Novel_lncRNA	Sense LncRNAs	13.31	14.27	0.100475	2.18176e-11
Os06g0286400	Os06t0286400-01	6	+	10374591	10374893	303	1	Annotated_lncRNA	ncRNA	1.69	0.73	-1.21105	0.0723183
Os06g0291100	Os06t0291100-00	6	+	10660648	10660954	307	1	Annotated_lncRNA	ncRNA	23.68	37.75	0.672808	0.0158655
Os06g0292600	Os06t0292600-01	6	+	10744672	10745214	543	1	Annotated_lncRNA	ncRNA	3.41	2.73	-0.320871	0.0872306
MSTRG.16021	MSTRG.16021.1	6	+	10853236	10853450	215	1	Novel_lncRNA	Intergenic LncRNAs	2.41	2.95	0.291682	0.231197
MSTRG.16023	MSTRG.16023.1	6	+	10919088	10921341	831	6	Novel_lncRNA	Sense LncRNAs	1.91	1.67	-0.193725	0.000314226
MSTRG.16053	MSTRG.16053.1	6	+	11603912	11605714	521	3	Novel_lncRNA	Intergenic LncRNAs	2.74	1.9	-0.528176	2.26599e-05
MSTRG.16064	MSTRG.16064.1	6	+	11777824	11778174	351	1	Novel_lncRNA	Intergenic LncRNAs	23.69	1.16	-4.35208	8.81171e-98	yes
MSTRG.16066	MSTRG.16066.1	6	+	11814260	11814864	605	1	Novel_lncRNA	Intergenic LncRNAs	5.63	0.25	-4.49313	2.34513e-40	yes
MSTRG.16069	MSTRG.16069.1	6	+	11950987	11951686	700	1	Novel_lncRNA	Intergenic LncRNAs	1.67	0.65	-1.36134	1.53353e-07	yes
MSTRG.16070	MSTRG.16070.1	6	+	11959360	11961068	1590	2	Novel_lncRNA	Sense LncRNAs	1.95	0.52	-1.90689	1.23686e-24	yes
MSTRG.16072	MSTRG.16072.1	6	-	12014719	12015701	463	2	Novel_lncRNA	Intergenic LncRNAs	0.14	1.53	3.45003	0.00859665	yes
MSTRG.16075	MSTRG.16075.2	6	+	12063218	12065262	1219	4	Novel_lncRNA	Sense LncRNAs	4.06	0.84	-2.27302	9.19453e-44	yes
Os06g0318800	Os06t0318800-01	6	-	12359510	12360112	603	1	Annotated_lncRNA	ncRNA	1.1	3	1.44746	0.00155419	yes
Os06g0319133	Os06t0319133-00	6	+	12366482	12367048	567	1	Annotated_lncRNA	ncRNA	1.08	0	-10.0768	0.00932291	yes
MSTRG.16111	MSTRG.16111.1	6	-	12506175	12506625	451	1	Novel_lncRNA	Intergenic LncRNAs	5.97	3.37	-0.824982	1.13745e-11
MSTRG.16112	MSTRG.16112.1	6	+	12506176	12506646	471	1	Novel_lncRNA	Intergenic LncRNAs	3.24	1.24	-1.38565	6.05318e-10	yes
MSTRG.16113	MSTRG.16113.1	6	-	12510937	12511704	768	1	Novel_lncRNA	Intergenic LncRNAs	302.91	232.87	-0.379364	0
MSTRG.16114	MSTRG.16114.1	6	+	12515859	12516136	278	1	Novel_lncRNA	Intergenic LncRNAs	39.68	17.04	-1.21949	4.1896e-58	yes
MSTRG.16115	MSTRG.16115.1	6	+	12527928	12528701	774	1	Novel_lncRNA	Intergenic LncRNAs	4.36	1.6	-1.44626	1.3547e-21	yes
MSTRG.16116	MSTRG.16116.1	6	+	12529666	12529885	220	1	Novel_lncRNA	Intergenic LncRNAs	28.69	4.84	-2.56747	1.38815e-60	yes
MSTRG.16117	MSTRG.16117.1	6	+	12530237	12530967	731	1	Novel_lncRNA	Intergenic LncRNAs	0.18	0	-7.49185	0.0755238
MSTRG.16118	MSTRG.16118.2	6	+	12531719	12535038	477	2	Novel_lncRNA	Intergenic LncRNAs	10.9	2.17	-2.32856	1.99757e-46	yes
MSTRG.16118	MSTRG.16118.1	6	+	12531719	12535134	573	2	Novel_lncRNA	Intergenic LncRNAs	362.32	94.87	-1.93324	0	yes
MSTRG.16118	MSTRG.16118.3	6	+	12531740	12535134	553	2	Novel_lncRNA	Intergenic LncRNAs	4.7	0.98	-2.26181	9.65105e-23	yes
MSTRG.16119	MSTRG.16119.1	6	+	12535749	12536191	443	1	Novel_lncRNA	Others(sense updown)	17.76	1.12	-3.98706	1.12052e-93	yes
MSTRG.16124	MSTRG.16124.2	6	-	12729448	12730868	1421	1	Novel_lncRNA	Sense LncRNAs	1.83	1.2	-0.608809	2.33413e-09
MSTRG.16125	MSTRG.16125.1	6	+	12745056	12745576	521	1	Novel_lncRNA	Intergenic LncRNAs	0.32	1.49	2.21917	0.0751475
MSTRG.16126	MSTRG.16126.1	6	+	12745904	12747033	1130	1	Novel_lncRNA	Intergenic LncRNAs	72.45	75.99	0.0688239	2.28871e-84
MSTRG.16127	MSTRG.16127.1	6	+	12747351	12747561	211	1	Novel_lncRNA	Intergenic LncRNAs	28.9	0.98	-4.88214	2.33232e-71	yes
MSTRG.16138	MSTRG.16138.3	6	-	12999310	13000888	861	4	Novel_lncRNA	Sense LncRNAs	3.66	2.84	-0.365953	7.26185e-09
MSTRG.16154	MSTRG.16154.1	6	-	13314452	13318244	2304	3	Novel_lncRNA	Sense LncRNAs	4.22	0.74	-2.51165	6.69867e-91	yes
Os06g0335950	Os06t0335950-00	6	+	13383816	13385580	1729	3	Annotated_lncRNA	ncRNA	1.21	0.23	-2.3953	0.00651262	yes
Os06g0337100	Os06t0337100-01	6	+	13439148	13440354	964	2	Annotated_lncRNA	ncRNA	6.85	1.98	-1.7906	0.00857434	yes
Os06g0343200	Os06t0343200-01	6	-	13727478	13729745	1361	2	Annotated_lncRNA	ncRNA	3.83	5.51	0.524708	0.00463891
MSTRG.16179	MSTRG.16179.1	6	-	13727478	13729976	1015	3	Novel_lncRNA	Sense LncRNAs	1.87	0.05	-5.22497	1.49192e-22	yes
MSTRG.16184	MSTRG.16184.1	6	-	13898910	13901954	2688	5	Novel_lncRNA	Sense LncRNAs	5.15	0.73	-2.8186	4.90334e-139	yes
MSTRG.16185	MSTRG.16185.2	6	-	13905236	13907351	973	6	Novel_lncRNA	Sense LncRNAs	2.5	0.49	-2.35107	1.36664e-22	yes
MSTRG.16186	MSTRG.16186.1	6	-	13910493	13912456	1662	3	Novel_lncRNA	Sense LncRNAs	1.86	0.39	-2.25376	1.69647e-27	yes
MSTRG.16187	MSTRG.16187.1	6	+	13946804	13947042	239	1	Novel_lncRNA	Others(sense updown)	6.11	3.07	-0.992934	1.0714e-07
MSTRG.16193	MSTRG.16193.1	6	+	14189370	14189602	233	1	Novel_lncRNA	Intergenic LncRNAs	0.84	0	-9.71425	0.0100472	yes
Os06g0363000	Os06t0363000-00	6	-	15055818	15057688	478	3	Annotated_lncRNA	ncRNA	14.41	24.43	0.761584	0.00228235
MSTRG.16213	MSTRG.16213.1	6	+	15063642	15064290	649	1	Novel_lncRNA	Intergenic LncRNAs	5.3	13.24	1.32084	0.0206346	yes
MSTRG.16214	MSTRG.16214.1	6	+	15128476	15128764	289	1	Novel_lncRNA	Intergenic LncRNAs	2.58	0	-11.3332	6.57177e-09	yes
MSTRG.16227	MSTRG.16227.1	6	-	15700837	15701264	428	1	Novel_lncRNA	Intergenic LncRNAs	1.29	0.06	-4.42626	7.68392e-07	yes
MSTRG.16243	MSTRG.16243.1	6	+	16056476	16056757	282	1	Novel_lncRNA	Intergenic LncRNAs	39.35	2.88	-3.77222	1.5996e-132	yes
Os06g0477600	Os06t0477600-01	6	-	16100089	16101983	1797	2	Annotated_lncRNA	ncRNA	2.15	3.51	0.707134	3.33645e-06
MSTRG.16245	MSTRG.16245.1	6	-	16100089	16101983	1895	1	Novel_lncRNA	Sense LncRNAs	2.94	0.2	-3.87774	5.98965e-67	yes
MSTRG.16248	MSTRG.16248.1	6	-	16238796	16239962	1167	1	Novel_lncRNA	Intergenic LncRNAs	2	1.65	-0.277534	2.15319e-06
Os06g0480500	Os06t0480500-01	6	+	16292587	16305052	1002	3	Annotated_lncRNA	ncRNA	7.81	3	-1.38036	0.087097
Os06g0481000	Os06t0481000-01	6	-	16307602	16308189	588	1	Annotated_lncRNA	ncRNA	0.53	0.49	-0.113211	0.0159113
MSTRG.16251	MSTRG.16251.1	6	-	16307602	16309616	1804	3	Novel_lncRNA	Sense LncRNAs	2.3	0.41	-2.48794	3.78392e-39	yes
Os06g0491901	Os06t0491901-01	6	-	16998507	17002390	1077	2	Annotated_lncRNA	ncRNA	6.88	0.76	-3.17834	0.00132944	yes
MSTRG.16277	MSTRG.16277.5	6	-	17004025	17010230	1367	8	Novel_lncRNA	Sense LncRNAs	3.45	0.57	-2.59756	1.78053e-45	yes
Os06g0499200	Os06t0499200-01	6	-	17573035	17575649	1906	3	Annotated_lncRNA	ncRNA	0.95	2.03	1.09548	0.00660896	yes
Os06g0505501	Os06t0505501-00	6	-	17981829	17982367	539	1	Annotated_lncRNA	ncRNA	3.97	5.46	0.459762	0.0161312
Os06g0506850	Os06t0506850-00	6	+	18015717	18017657	447	4	Annotated_lncRNA	ncRNA	2.13	2.68	0.33138	0.0732188
MSTRG.16325	MSTRG.16325.1	6	+	18458988	18459712	238	2	Novel_lncRNA	Intergenic LncRNAs	0.27	1.39	2.36405	0.300227
MSTRG.16329	MSTRG.16329.1	6	-	18984985	18985986	1002	1	Novel_lncRNA	Others(anti down)	1.62	0.18	-3.16993	2.31995e-18	yes
MSTRG.16333	MSTRG.16333.1	6	+	19278411	19279492	1082	1	Novel_lncRNA	Intergenic LncRNAs	2.88	3.58	0.313891	0.00305797
Os06g0526650	Os06t0526650-00	6	+	19517354	19519864	538	3	Annotated_lncRNA	ncRNA	4.51	0	-12.1389	0.0332224	yes
Os06g0536850	Os06t0536850-01	6	-	20106673	20106935	263	1	Annotated_lncRNA	ncRNA	40.47	19.61	-1.04526	0.0359152	yes
Os06g0542150	Os06t0542150-00	6	-	20375011	20381325	957	6	Annotated_lncRNA	ncRNA	12.68	4.93	-1.3629	0.0033242	yes
Os06g0550266	Os06t0550266-00	6	+	20851295	20853560	547	3	Annotated_lncRNA	ncRNA	0.9	0.57	-0.658963	0.0519572
Os06g0550901	Os06t0550901-00	6	-	20873046	20873423	378	1	Annotated_lncRNA	ncRNA	1.67	0.43	-1.95744	0.0286787	yes
Os06g0551450	Os06t0551450-00	6	+	20896377	20901481	712	2	Annotated_lncRNA	ncRNA	5.4	0.46	-3.55325	0.0406776	yes
Os06g0556450	Os06t0556450-00	6	-	21222684	21223385	625	2	Annotated_lncRNA	ncRNA	41.16	22.11	-0.896544	0.000144127
MSTRG.16474	MSTRG.16474.1	6	-	21857504	21857730	227	1	Novel_lncRNA	Intergenic LncRNAs	0.29	0.11	-1.39855	0.281469
MSTRG.16487	MSTRG.16487.2	6	+	22081918	22084759	597	2	Novel_lncRNA	Sense LncRNAs	1.15	0.95	-0.275634	0.0175194
Os06g0574266	Os06t0574266-00	6	+	22271415	22275302	2435	9	Annotated_lncRNA	ncRNA	7.46	0.76	-3.2951	0.0703135
Os06g0574601	Os06t0574601-00	6	-	22310643	22312998	555	3	Annotated_lncRNA	ncRNA	1	7.88	2.9782	0.00551575	yes
Os06g0579400	Os06t0579400-01	6	-	22588231	22588683	453	1	Annotated_lncRNA	ncRNA	13.36	23.38	0.807355	0.0117377
Os06g0584400	Os06t0584400-01	6	-	22846347	22847044	698	1	Annotated_lncRNA	ncRNA	18.78	31.03	0.724467	9.94732e-06
MSTRG.16523	MSTRG.16523.1	6	-	22950997	22955570	4574	1	Novel_lncRNA	Antisense LncRNAs	2.82	0.27	-3.38466	2.20159e-148	yes
Os06g0594940	Os06t0594940-00	6	+	23393217	23393611	395	1	Annotated_lncRNA	ncRNA	13.64	8.93	-0.611112	0.00434225
MSTRG.16564	MSTRG.16564.1	6	+	23572210	23572471	262	1	Novel_lncRNA	Intergenic LncRNAs	11.24	29.42	1.38816	0.01164	yes
MSTRG.16565	MSTRG.16565.1	6	+	23572843	23573094	252	1	Novel_lncRNA	Others(sense updown)	1.16	2.41	1.05491	1
MSTRG.16567	MSTRG.16567.1	6	+	23576301	23576980	680	1	Novel_lncRNA	Antisense LncRNAs	10.96	10.95	-0.00131693	1.58762e-11
MSTRG.16568	MSTRG.16568.1	6	+	23577926	23578422	497	1	Novel_lncRNA	Antisense LncRNAs	6.07	10.71	0.81919	0.633411
MSTRG.16569	MSTRG.16569.1	6	+	23580084	23581483	1400	1	Novel_lncRNA	Intronic LncRNAs	2202.27	5101.19	1.21184	2.00784e-41	yes
MSTRG.16570	MSTRG.16570.1	6	+	23581832	23582272	441	1	Novel_lncRNA	Intergenic LncRNAs	9.71	10	0.0424568	9.67009e-07
MSTRG.16571	MSTRG.16571.1	6	+	23585722	23586728	1007	1	Novel_lncRNA	Antisense LncRNAs	8.69	16.02	0.882446	0.748324
MSTRG.16573	MSTRG.16573.1	6	-	23591133	23592159	1027	1	Novel_lncRNA	Antisense LncRNAs	36.04	64.69	0.843944	0.177251
Os06g0600200	Os06t0600200-00	6	-	23686450	23687235	560	3	Annotated_lncRNA	ncRNA	27.45	10.24	-1.42259	0.0875334
MSTRG.16585	MSTRG.16585.1	6	+	23795573	23798167	2595	1	Novel_lncRNA	Intergenic LncRNAs	4.75	2.02	-1.23357	3.8412e-65	yes
Os06g0611050	Os06t0611050-00	6	-	24360470	24363370	2271	7	Annotated_lncRNA	ncRNA	12.95	45.46	1.81165	0.00794972	yes
Os06g0618650	Os06t0618650-01	6	-	24837427	24839039	1613	1	Annotated_lncRNA	ncRNA	13.28	8.33	-0.672867	0.0212735
Os06g0623050	Os06t0623050-00	6	+	25054931	25058629	1277	6	Annotated_lncRNA	ncRNA	3.97	2.95	-0.428424	0.095898
Os06g0624200	Os06t0624200-01	6	-	25122311	25127217	2742	4	Annotated_lncRNA	ncRNA	3.3	0.63	-2.38904	5.98298e-05	yes
Os06g0624850	Os06t0624850-00	6	-	25154307	25155583	1277	1	Annotated_lncRNA	ncRNA	2.35	0.43	-2.45025	0.000865664	yes
Os06g0624950	Os06t0624950-00	6	-	25158967	25163735	674	3	Annotated_lncRNA	ncRNA	1.18	0	-10.2046	0.0695296
MSTRG.16709	MSTRG.16709.1	6	+	25315693	25340057	442	2	Novel_lncRNA	Antisense LncRNAs	0.51	0.05	-3.3505	0.00514524	yes
Os06g0639150	Os06t0639150-00	6	+	25970491	25974468	1906	5	Annotated_lncRNA	ncRNA	4.79	0	-12.2258	0.0338496	yes
Os06g0639550	Os06t0639550-01	6	-	26005338	26006442	816	2	Annotated_lncRNA	ncRNA	2.16	1.49	-0.535719	0.0486241
MSTRG.16772	MSTRG.16772.1	6	+	26128917	26129955	1039	1	Novel_lncRNA	Intergenic LncRNAs	1.78	1.54	-0.208947	6.90868e-05
Os06g0649600	Os06t0649600-01	6	+	26554537	26560758	1552	5	Annotated_lncRNA	ncRNA	1.44	0.14	-3.36257	0.0743131
MSTRG.16823	MSTRG.16823.2	6	+	26554558	26560758	1528	5	Novel_lncRNA	Sense LncRNAs	3.4	1.99	-0.772766	1.23414e-20
MSTRG.16841	MSTRG.16841.1	6	+	26703227	26703563	337	1	Novel_lncRNA	Intergenic LncRNAs	0.87	0.3	-1.53605	0.0164644	yes
Os06g0662100	Os06t0662100-01	6	+	27294072	27294875	804	1	Annotated_lncRNA	ncRNA	6.47	5.05	-0.357482	0.0401092
Os06g0662150	Os06t0662150-01	6	-	27295786	27296233	448	1	Annotated_lncRNA	ncRNA	1.45	0.98	-0.565199	0.0465819
Os06g0663450	Os06t0663450-00	6	-	27384936	27386395	1373	2	Annotated_lncRNA	ncRNA	57063.9	7951.2	-2.84333	0.0397223	yes
Os06g0666650	Os06t0666650-00	6	+	27601383	27604056	1063	10	Annotated_lncRNA	ncRNA	0.47	0.74	0.654865	0.00596938
MSTRG.16934	MSTRG.16934.1	6	+	27809122	27809758	637	1	Novel_lncRNA	Intergenic LncRNAs	0.31	1.15	1.89129	0.231849
MSTRG.16935	MSTRG.16935.1	6	+	27813149	27814245	1097	1	Novel_lncRNA	Intergenic LncRNAs	1.54	4.5	1.54699	0.0084623	yes
Os06g0676300	Os06t0676300-02	6	+	28080797	28083063	2267	1	Annotated_lncRNA	ncRNA	5.67	2.49	-1.1872	0.00354976	yes
Os06g0676900	Os06t0676900-01	6	-	28108706	28109191	486	1	Annotated_lncRNA	ncRNA	1.04	0.48	-1.11548	0.00095325	yes
MSTRG.16969	MSTRG.16969.1	6	-	28198060	28198842	783	1	Novel_lncRNA	Intergenic LncRNAs	0.25	2.23	3.15704	1.86255e-05	yes
Os06g0678875	Os06t0678875-00	6	+	28234754	28238338	1662	8	Annotated_lncRNA	ncRNA	0.88	2.52	1.51785	0.0987992
MSTRG.16993	MSTRG.16993.1	6	+	28442326	28442649	324	1	Novel_lncRNA	Intergenic LncRNAs	1.9	0.08	-4.56986	1.97272e-07	yes
Os06g0686700	Os06t0686700-01	6	-	28639438	28641587	1936	3	Annotated_lncRNA	ncRNA	0	6.71	12.7121	0.0592112
Os06g0687050	Os06t0687050-00	6	+	28644134	28647673	2172	7	Annotated_lncRNA	ncRNA	2.69	0.77	-1.80468	0.0259709	yes
Os06g0687850	Os06t0687850-00	6	-	28688979	28693688	1705	12	Annotated_lncRNA	ncRNA	1.29	0	-10.3332	0.0489429	yes
Os06g0690400	Os06t0690400-00	6	+	28770724	28771078	355	1	Annotated_lncRNA	ncRNA	5.02	1.52	-1.72362	0.00307854	yes
Os06g0692900	Os06t0692900-00	6	+	28910528	28913984	1754	9	Annotated_lncRNA	ncRNA	5.46	12.17	1.15636	0.0181161	yes
Os06g0693025	Os06t0693025-00	6	-	28923433	28923782	350	1	Annotated_lncRNA	ncRNA	11.4	15.24	0.418829	0.00794989
MSTRG.17068	MSTRG.17068.1	6	+	29175691	29179729	4039	1	Novel_lncRNA	Sense LncRNAs	2.67	0.75	-1.83188	2.07329e-78	yes
Os06g0708075	Os06t0708075-00	6	-	29951260	29953086	1047	5	Annotated_lncRNA	ncRNA	0.89	0	-9.79766	0.040346	yes
Os06g0710401	Os06t0710401-00	6	+	30036322	30037002	377	3	Annotated_lncRNA	ncRNA	12.02	11.79	-0.0278732	0.00805798
Os06g0713600	Os06t0713600-00	6	+	30225449	30226988	1321	3	Annotated_lncRNA	ncRNA	9.35	0.49	-4.25411	0.0874101
Os06g0715550	Os06t0715550-00	6	-	30371126	30374329	925	8	Annotated_lncRNA	ncRNA	0.64	2.64	2.04439	0.0844724
Os06g0717850	Os06t0717850-00	6	+	30497073	30497341	269	1	Annotated_lncRNA	ncRNA	4.33	1.3	-1.73586	0.045833	yes
Os06g0726501	Os06t0726501-00	6	+	30900676	30902017	1032	2	Annotated_lncRNA	ncRNA	1.56	1.98	0.343954	0.0507618
Os06g0728550	Os06t0728550-01	6	-	31015205	31016171	967	1	Annotated_lncRNA	ncRNA	4.43	3.84	-0.2062	0.00333303
Os06g0729350	Os06t0729350-00	6	-	31076001	31077075	611	5	Annotated_lncRNA	ncRNA	2.98	1.28	-1.21917	0.00374948	yes
MSTRG.17323	MSTRG.17323.1	7	-	138748	139068	321	1	Novel_lncRNA	Intergenic LncRNAs	0.51	2.45	2.26421	0.0530066
Os07g0105750	Os07t0105750-00	7	+	307382	312042	2476	15	Annotated_lncRNA	ncRNA	0.79	0	-9.62571	0.0866116
MSTRG.17355	MSTRG.17355.1	7	+	548481	554121	5411	3	Novel_lncRNA	Sense LncRNAs	3.02	0.6	-2.33151	2.94949e-141	yes
MSTRG.17365	MSTRG.17365.1	7	+	614918	617568	822	2	Novel_lncRNA	Sense LncRNAs	1.94	0.28	-2.79256	7.52052e-17	yes
MSTRG.17399	MSTRG.17399.1	7	+	1148758	1148969	212	1	Novel_lncRNA	Intergenic LncRNAs	0.15	12.9	6.42626	3.76523e-14	yes
MSTRG.17431	MSTRG.17431.1	7	+	1636745	1637028	284	1	Novel_lncRNA	Others(sense updown)	1.6	1.16	-0.463947	0.0241431
Os07g0132001	Os07t0132001-00	7	-	1686263	1686574	312	1	Annotated_lncRNA	ncRNA	0	1.43	10.4818	0.00476464	yes
Os07g0135550	Os07t0135550-00	7	+	1860772	1862444	765	6	Annotated_lncRNA	ncRNA	5.16	2.77	-0.897485	0.0133975
MSTRG.17460	MSTRG.17460.1	7	-	2028950	2031926	1754	3	Novel_lncRNA	Intergenic LncRNAs	3.68	2.99	-0.29956	1.35133e-15
Os07g0139600	Os07t0139600-01	7	-	2092778	2093696	366	2	Annotated_lncRNA	ncRNA	28.48	0.35	-6.34645	0.0012703	yes
MSTRG.17466	MSTRG.17466.1	7	+	2104310	2104626	317	1	Novel_lncRNA	Intergenic LncRNAs	1.33	0.8	-0.733354	0.0135915
Os07g0142050	Os07t0142050-00	7	-	2171775	2172572	522	3	Annotated_lncRNA	ncRNA	13.14	5.63	-1.22276	0.00359651	yes
MSTRG.17489	MSTRG.17489.1	7	+	2243680	2245631	540	3	Novel_lncRNA	Intergenic LncRNAs	1.98	0	-10.9513	1.84666e-12	yes
Os07g0146800	Os07t0146800-01	7	+	2400237	2400969	537	3	Annotated_lncRNA	ncRNA	1.21	0	-10.2408	0.00250082	yes
Os07g0150600	Os07t0150600-00	7	+	2635874	2640419	2258	5	Annotated_lncRNA	ncRNA	1.18	2.62	1.15078	0.0810037
MSTRG.17521	MSTRG.17521.1	7	+	2727051	2728024	974	1	Novel_lncRNA	Antisense LncRNAs	10.36	0.55	-4.23545	3.95464e-119	yes
MSTRG.17568	MSTRG.17568.1	7	+	3295059	3295516	458	1	Novel_lncRNA	Intergenic LncRNAs	0.78	1.38	0.823122	1
Os07g0170400	Os07t0170400-00	7	+	3727685	3728433	507	3	Annotated_lncRNA	ncRNA	5.2	5.68	0.127379	0.0590085
Os07g0171350	Os07t0171350-00	7	-	3775952	3778727	1205	9	Annotated_lncRNA	ncRNA	1.36	3.25	1.25683	0.025982	yes
Os07g0177150	Os07t0177150-01	7	+	4086746	4087286	441	2	Annotated_lncRNA	ncRNA	0.98	1.01	0.0435016	0.0221933
Os07g0184300	Os07t0184300-01	7	-	4460555	4460829	275	1	Annotated_lncRNA	ncRNA	0.73	0.38	-0.941897	0.0554845
Os07g0185500	Os07t0185500-01	7	+	4536493	4536780	288	1	Annotated_lncRNA	ncRNA	1.38	0.75	-0.879706	0.00301766
Os07g0188249	Os07t0188249-00	7	-	4725288	4725583	296	1	Annotated_lncRNA	ncRNA	1.24	0.2	-2.63227	0.075496
Os07g0191801	Os07t0191801-01	7	-	4952562	4956062	3501	1	Annotated_lncRNA	ncRNA	3.01	0	-11.5555	0.0609042
Os07g0192400	Os07t0192400-01	7	+	4986843	4987429	587	1	Annotated_lncRNA	ncRNA	6.13	0.54	-3.50486	0.012821	yes
MSTRG.17730	MSTRG.17730.1	7	-	5113943	5115514	763	2	Novel_lncRNA	Antisense LncRNAs	4.08	0.36	-3.5025	5.57315e-38	yes
Os07g0194351	Os07t0194351-01	7	+	5114256	5116344	2089	1	Annotated_lncRNA	ncRNA	2.77	2.52	-0.136462	0.0477328
MSTRG.17742	MSTRG.17742.1	7	+	5276964	5279196	1098	5	Novel_lncRNA	Sense LncRNAs	3.48	0.31	-3.48875	2.80054e-46	yes
MSTRG.17744	MSTRG.17744.1	7	-	5290815	5291120	306	1	Novel_lncRNA	Intergenic LncRNAs	1.06	1.82	0.779874	1
Os07g0203950	Os07t0203950-00	7	-	5592562	5596381	613	4	Annotated_lncRNA	ncRNA	0.72	0.23	-1.64636	0.0213193	yes
Os07g0208566	Os07t0208566-00	7	+	5855693	5857002	760	3	Annotated_lncRNA	ncRNA	1.98	0	-10.9513	0.000869683	yes
Os07g0208950	Os07t0208950-00	7	-	5883104	5883410	307	1	Annotated_lncRNA	ncRNA	2.9	0.49	-2.5652	0.0239161	yes
Os07g0213350	Os07t0213350-00	7	+	6225877	6231558	2429	9	Annotated_lncRNA	ncRNA	0.46	2.73	2.5692	0.0987291
Os07g0223001	Os07t0223001-01	7	-	6803730	6806860	3131	1	Annotated_lncRNA	ncRNA	1282.17	58.34	-4.45796	0.0937486
Os07g0223733	Os07t0223733-00	7	-	6843741	6844490	452	2	Annotated_lncRNA	ncRNA	1.33	0.24	-2.47032	0.0101403	yes
MSTRG.17851	MSTRG.17851.1	7	+	7356132	7356563	432	1	Novel_lncRNA	Antisense LncRNAs	1.5	0.12	-3.64386	5.11175e-08	yes
Os07g0232850	Os07t0232850-00	7	-	7396993	7397516	524	1	Annotated_lncRNA	ncRNA	0.66	3.21	2.28204	0.00986523	yes
Os07g0242050	Os07t0242050-01	7	+	7923179	7923736	558	1	Annotated_lncRNA	ncRNA	3.02	4.92	0.70411	0.0898111
MSTRG.17892	MSTRG.17892.1	7	-	8214618	8215792	1175	1	Novel_lncRNA	Intergenic LncRNAs	2.18	4.24	0.959736	0.932634
MSTRG.17911	MSTRG.17911.1	7	+	8610566	8613236	1541	3	Novel_lncRNA	Intergenic LncRNAs	1.89	1.16	-0.704261	1.57291e-11
MSTRG.17912	MSTRG.17912.1	7	-	8679295	8682981	1006	4	Novel_lncRNA	Intergenic LncRNAs	6.8	0.93	-2.87023	6.91631e-71	yes
MSTRG.17924	MSTRG.17924.1	7	-	9095611	9096952	544	2	Novel_lncRNA	Intergenic LncRNAs	1.25	3.91	1.64524	0.0723141
MSTRG.17950	MSTRG.17950.3	7	+	10274330	10277895	1086	4	Novel_lncRNA	Sense LncRNAs	1.07	0.38	-1.49354	4.79431e-08	yes
Os07g0281500	Os07t0281500-01	7	-	10716325	10716844	520	1	Annotated_lncRNA	ncRNA	0.52	2.6	2.32193	0.02893	yes
Os07g0294650	Os07t0294650-01	7	+	11484899	11485467	569	1	Annotated_lncRNA	ncRNA	36.83	25.37	-0.537758	0.00232355
Os07g0297325	Os07t0297325-00	7	+	11632476	11635220	1323	8	Annotated_lncRNA	ncRNA	4.83	1.83	-1.40018	0.0560204
Os07g0299701	Os07t0299701-00	7	+	11783879	11784744	866	1	Annotated_lncRNA	ncRNA	1.72	4.64	1.43172	0.040999	yes
MSTRG.17987	MSTRG.17987.1	7	-	11816327	11816549	223	1	Novel_lncRNA	Intergenic LncRNAs	0.15	0	-7.22882	1
MSTRG.17988	MSTRG.17988.1	7	-	11825294	11825550	257	1	Novel_lncRNA	Intergenic LncRNAs	0.88	0.2	-2.1375	0.0268669	yes
MSTRG.17994	MSTRG.17994.1	7	+	11908922	11909551	630	1	Novel_lncRNA	Others(anti down)	0.41	2.65	2.6923	0.000379947	yes
MSTRG.18002	MSTRG.18002.3	7	-	12652992	12656414	906	4	Novel_lncRNA	Sense LncRNAs	6.31	0.18	-5.13157	1.17384e-66	yes
MSTRG.18005	MSTRG.18005.1	7	-	12661673	12662882	1210	1	Novel_lncRNA	Antisense LncRNAs	0.2	0.2	0	0.368061
MSTRG.18014	MSTRG.18014.1	7	-	12875922	12876434	513	1	Novel_lncRNA	Intergenic LncRNAs	7.95	8.82	0.149824	2.3692e-05
Os07g0418150	Os07t0418150-01	7	-	13309328	13311887	1095	5	Annotated_lncRNA	ncRNA	188.77	184.83	-0.0304306	0.0141894
MSTRG.18037	MSTRG.18037.1	7	-	13309328	13311887	2476	2	Novel_lncRNA	Sense LncRNAs	2.6	0.35	-2.89308	2.53468e-67	yes
MSTRG.18056	MSTRG.18056.1	7	-	14230357	14232650	2294	1	Novel_lncRNA	Intergenic LncRNAs	0.29	1487.81	12.3248	0	yes
MSTRG.18056	MSTRG.18056.2	7	-	14230358	14232650	2238	2	Novel_lncRNA	Intergenic LncRNAs	14.5	1773.2	6.93416	0	yes
MSTRG.18057	MSTRG.18057.1	7	+	14230475	14232282	1808	1	Novel_lncRNA	Intergenic LncRNAs	0.16	3.76	4.55459	1.61005e-27	yes
MSTRG.18074	MSTRG.18074.1	7	+	14657591	14657891	301	1	Novel_lncRNA	Intergenic LncRNAs	2.16	3.28	0.602665	0.632568
Os07g0446400	Os07t0446400-01	7	+	15258017	15259460	1444	1	Annotated_lncRNA	ncRNA	112.73	429.31	1.92915	0.00205917	yes
Os07g0448150	Os07t0448150-00	7	-	15359100	15360092	766	3	Annotated_lncRNA	ncRNA	0.31	2.38	2.94062	0.0430786	yes
Os07g0462450	Os07t0462450-00	7	+	16226931	16230210	326	2	Annotated_lncRNA	ncRNA	3.42	0	-11.7398	0.00329321	yes
MSTRG.18136	MSTRG.18136.1	7	+	16520678	16520920	243	1	Novel_lncRNA	Intronic LncRNAs	52.34	15.74	-1.73348	9.19073e-88	yes
MSTRG.18144	MSTRG.18144.1	7	-	16669823	16670337	515	1	Novel_lncRNA	Antisense LncRNAs	0.19	11.66	5.93942	9.7277e-30	yes
MSTRG.18146	MSTRG.18146.1	7	-	16719311	16719936	626	1	Novel_lncRNA	Intergenic LncRNAs	1.92	0	-10.9069	6.10845e-14	yes
MSTRG.18167	MSTRG.18167.2	7	+	17126237	17130619	2292	3	Novel_lncRNA	Sense LncRNAs	3.57	1.04	-1.77934	1.13511e-58	yes
MSTRG.18196	MSTRG.18196.1	7	+	17538435	17538665	231	1	Novel_lncRNA	Intergenic LncRNAs	0	0.22	7.78136	1
Os07g0486200	Os07t0486200-00	7	+	17881273	17887472	2570	12	Annotated_lncRNA	ncRNA	394.15	130.34	-1.59646	0.00536785	yes
MSTRG.18237	MSTRG.18237.1	7	-	18466178	18471032	3563	3	Novel_lncRNA	Antisense LncRNAs	2.07	0.11	-4.23406	3.16151e-87	yes
MSTRG.18263	MSTRG.18263.1	7	-	18777420	18811199	505	2	Novel_lncRNA	Intergenic LncRNAs	5.33	2.16	-1.3031	3.12322e-16	yes
Os07g0505101	Os07t0505101-00	7	-	19092583	19094057	383	2	Annotated_lncRNA	ncRNA	69.38	64.19	-0.112171	0.00827333
Os07g0507850	Os07t0507850-00	7	-	19289091	19289369	279	1	Annotated_lncRNA	ncRNA	1.34	0	-10.388	0.096325
MSTRG.18308	MSTRG.18308.1	7	-	19473293	19479379	925	2	Novel_lncRNA	Sense LncRNAs	2.33	0.11	-4.40475	1.60694e-25	yes
MSTRG.18312	MSTRG.18312.1	7	+	19529361	19529685	325	1	Novel_lncRNA	Others(anti down)	2	0.55	-1.8625	1.28939e-05	yes
MSTRG.18314	MSTRG.18314.1	7	+	19533030	19533298	269	1	Novel_lncRNA	Others(anti down),Others(sense updown)	34.73	9.14	-1.92592	5.77498e-71	yes
Os07g0530850	Os07t0530850-00	7	-	20779574	20780176	603	1	Annotated_lncRNA	ncRNA	2.09	5.05	1.27278	0.0457302	yes
Os07g0531800	Os07t0531800-01	7	-	20818263	20818612	350	1	Annotated_lncRNA	ncRNA	5.23	2.05	-1.35119	0.047853	yes
Os07g0536101	Os07t0536101-01	7	-	21045943	21047572	1630	1	Annotated_lncRNA	ncRNA	8.62	0.7	-3.62226	0.0116969	yes
Os07g0539350	Os07t0539350-00	7	+	21238656	21239437	495	2	Annotated_lncRNA	ncRNA	3.07	1.07	-1.52063	0.00414013	yes
Os07g0545550	Os07t0545550-00	7	+	21594999	21597402	1167	3	Annotated_lncRNA	ncRNA	14.02	50.79	1.85706	0.00199659	yes
Os07g0546050	Os07t0546050-00	7	-	21627027	21628545	683	5	Annotated_lncRNA	ncRNA	1.46	0.15	-3.28293	0.0736979
Os07g0546650	Os07t0546650-00	7	+	21668470	21671876	1489	7	Annotated_lncRNA	ncRNA	5.89	1.08	-2.44724	0.0696572
MSTRG.18433	MSTRG.18433.1	7	-	21711140	21711496	357	1	Novel_lncRNA	Intergenic LncRNAs	2.36	0.64	-1.88264	5.5298e-07	yes
MSTRG.18444	MSTRG.18444.2	7	+	21823118	21825223	1863	3	Novel_lncRNA	Sense LncRNAs	2.83	0.26	-3.44422	5.19036e-64	yes
MSTRG.18456	MSTRG.18456.1	7	+	22046017	22048220	722	6	Novel_lncRNA	Sense LncRNAs	3.18	12.1	1.92791	7.76751e-08	yes
Os07g0558250	Os07t0558250-00	7	+	22304614	22305141	528	1	Annotated_lncRNA	ncRNA	0.59	0.37	-0.67319	0.05371
Os07g0559000	Os07t0559000-01	7	+	22340365	22340788	424	1	Annotated_lncRNA	ncRNA	13.1	4.39	-1.57727	0.0193094	yes
MSTRG.18490	MSTRG.18490.1	7	-	22398124	22398458	335	1	Novel_lncRNA	Intergenic LncRNAs	15.66	30.63	0.967861	0.833074
MSTRG.18491	MSTRG.18491.1	7	+	22398132	22398449	318	1	Novel_lncRNA	Intergenic LncRNAs	10.92	5.98	-0.868755	1.62003e-15
Os07g0562950	Os07t0562950-00	7	-	22515343	22518319	1168	9	Annotated_lncRNA	ncRNA	0.32	4.98	3.96	0.0472309	yes
Os07g0567050	Os07t0567050-00	7	+	22783649	22783879	231	1	Annotated_lncRNA	ncRNA	0.92	0.64	-0.523562	0.0065285
MSTRG.18552	MSTRG.18552.1	7	-	23008297	23010857	2561	1	Novel_lncRNA	Antisense LncRNAs	0.27	1.77	2.71272	1.80714e-09	yes
Os07g0572850	Os07t0572850-00	7	-	23146159	23148178	1235	6	Annotated_lncRNA	ncRNA	17.22	17.39	0.0141728	0.0688475
Os07g0574850	Os07t0574850-00	7	-	23245050	23246186	497	3	Annotated_lncRNA	ncRNA	4.5	0.31	-3.85958	0.00370148	yes
Os07g0577350	Os07t0577350-00	7	-	23345956	23348582	1630	2	Annotated_lncRNA	ncRNA	10.63	13.66	0.361816	0.00250697
Os07g0579050	Os07t0579050-01	7	-	23436019	23436842	549	2	Annotated_lncRNA	ncRNA	4.75	1.02	-2.21936	0.0816229
Os07g0584550	Os07t0584550-00	7	-	23706154	23708855	891	2	Annotated_lncRNA	ncRNA	2.08	2.46	0.242075	0.0312027
Os07g0587450	Os07t0587450-00	7	+	23905381	23906779	1399	1	Annotated_lncRNA	ncRNA	4.65	9.01	0.954296	0.0343631
Os07g0604350	Os07t0604350-00	7	-	24752889	24755200	1365	5	Annotated_lncRNA	ncRNA	9.06	30.42	1.74744	0.00415103	yes
Os07g0607000	Os07t0607000-00	7	+	24935299	24935919	461	2	Annotated_lncRNA	ncRNA	366.5	476.06	0.37733	0.00476464
Os07g0608450	Os07t0608450-01	7	+	25018623	25019863	1241	1	Annotated_lncRNA	ncRNA	6.33	0.94	-2.75147	0.0199197	yes
Os07g0617901	Os07t0617901-00	7	+	25494794	25496985	668	7	Annotated_lncRNA	ncRNA	3.32	5.99	0.851373	0.0827887
Os07g0618450	Os07t0618450-00	7	-	25519737	25522901	1543	9	Annotated_lncRNA	ncRNA	5.66	3.69	-0.617181	0.00699109
MSTRG.18818	MSTRG.18818.1	7	+	25649962	25651481	280	2	Novel_lncRNA	Sense LncRNAs	10.02	16.4	0.710813	0.347251
Os07g0621600	Os07t0621600-00	7	-	25691906	25692138	233	1	Annotated_lncRNA	ncRNA	7.71	13	0.753709	0.0741864
Os07g0626466	Os07t0626466-00	7	+	25945994	25947286	1084	2	Annotated_lncRNA	ncRNA	5.85	1.13	-2.37211	0.0319871	yes
Os07g0627600	Os07t0627600-00	7	+	26013462	26013708	247	1	Annotated_lncRNA	ncRNA	23	17.45	-0.398407	0.0834869
Os07g0630533	Os07t0630533-00	7	-	26141971	26142671	601	2	Annotated_lncRNA	ncRNA	3.48	1.27	-1.45426	0.0334103	yes
Os07g0645050	Os07t0645050-00	7	+	26882474	26882926	453	1	Annotated_lncRNA	ncRNA	1.96	0	-10.9366	0.00085323	yes
Os07g0647550	Os07t0647550-00	7	-	27041334	27041774	347	2	Annotated_lncRNA	ncRNA	45.88	17.67	-1.37656	0.0330861	yes
Os07g0648100	Os07t0648100-01	7	-	27062738	27069070	1225	3	Annotated_lncRNA	ncRNA	3.02	0	-11.5603	0.0498123	yes
MSTRG.18966	MSTRG.18966.1	7	-	27062738	27069070	1073	4	Novel_lncRNA	Sense LncRNAs	1.84	0.32	-2.52356	2.94831e-19	yes
MSTRG.18975	MSTRG.18975.2	7	-	27333066	27336267	733	2	Novel_lncRNA	Antisense LncRNAs	1.4	0.03	-5.54432	1.84666e-12	yes
Os07g0661201	Os07t0661201-00	7	-	27884460	27887982	1666	6	Annotated_lncRNA	ncRNA	3.92	2.84	-0.464963	0.0520587
MSTRG.19035	MSTRG.19035.1	7	-	27976933	27979763	1738	3	Novel_lncRNA	Bidirectional LncRNAs	101.8	12.57	-3.01768	0	yes
MSTRG.19036	MSTRG.19036.1	7	+	27977500	27977776	277	1	Novel_lncRNA	Bidirectional LncRNAs	14.52	24.67	0.764716	0.357977
MSTRG.19037	MSTRG.19037.1	7	+	27979451	27979782	332	1	Novel_lncRNA	Others(sense updown)	2.83	2.14	-0.403191	0.00174518
Os07g0668251	Os07t0668251-00	7	+	28215244	28221994	1498	11	Annotated_lncRNA	ncRNA	3.64	0.47	-2.95321	0.0764001
Os07g0669750	Os07t0669750-00	7	-	28325109	28326773	511	4	Annotated_lncRNA	ncRNA	5.43	5.9	0.119763	0.0146435
Os07g0671450	Os07t0671450-00	7	+	28392125	28392684	560	1	Annotated_lncRNA	ncRNA	5.41	4.39	-0.301408	1.45822e-05
Os07g0672534	Os07t0672534-00	7	+	28425025	28425406	382	1	Annotated_lncRNA	ncRNA	3.74	2.67	-0.486199	0.0671234
Os07g0674750	Os07t0674750-00	7	-	28537719	28539955	653	4	Annotated_lncRNA	ncRNA	2.7	0	-11.3987	0.0795358
MSTRG.19112	MSTRG.19112.2	7	-	28631211	28638569	1991	13	Novel_lncRNA	Sense LncRNAs	2.08	0.57	-1.86755	2.6201e-31	yes
MSTRG.19112	MSTRG.19112.4	7	-	28631688	28638569	3601	10	Novel_lncRNA	Sense LncRNAs	4.54	1.82	-1.31875	5.77519e-90	yes
Os07g0680150	Os07t0680150-00	7	+	28809876	28810298	423	1	Annotated_lncRNA	ncRNA	4.42	1.24	-1.83371	0.00898562	yes
Os07g0689900	Os07t0689900-00	7	-	29343108	29343652	545	1	Annotated_lncRNA	ncRNA	0	3.8	11.8918	0.0126936	yes
Os07g0693450	Os07t0693450-01	7	+	29504279	29504701	423	1	Annotated_lncRNA	ncRNA	0.85	0.81	-0.0695409	0.0230217
Os07g0695200	Os07t0695200-00	7	-	29623146	29628554	1953	7	Annotated_lncRNA	ncRNA	74.08	52.81	-0.488273	0.0590686
Os08g0100300	Os08t0100300-01	8	+	24352	25840	1282	3	Annotated_lncRNA	ncRNA	0.43	3.07	2.83583	0.0341438	yes
MSTRG.19263	MSTRG.19263.1	8	+	241896	242621	726	1	Novel_lncRNA	Antisense LncRNAs	1.03	1.12	0.120854	0.0661274
Os08g0110650	Os08t0110650-00	8	+	557918	558182	265	1	Annotated_lncRNA	ncRNA	5.16	3.79	-0.445173	0.0513993
Os08g0112450	Os08t0112450-01	8	+	658651	659299	649	1	Annotated_lncRNA	ncRNA	1.32	0.26	-2.34395	0.018794	yes
Os08g0120550	Os08t0120550-00	8	+	1123079	1125981	1027	3	Annotated_lncRNA	ncRNA	55.68	46.99	-0.244805	0.0255809
Os08g0127750	Os08t0127750-01	8	-	1587304	1588227	924	1	Annotated_lncRNA	ncRNA	0.85	0	-9.73132	0.0942605
MSTRG.19396	MSTRG.19396.1	8	-	1675222	1675587	366	1	Novel_lncRNA	Antisense LncRNAs	0.71	1.18	0.732896	1
Os08g0139300	Os08t0139300-00	8	+	2183029	2183925	587	3	Annotated_lncRNA	ncRNA	6.47	16.38	1.3401	0.0650115
MSTRG.19446	MSTRG.19446.1	8	-	2427513	2431147	913	4	Novel_lncRNA	Sense LncRNAs	6.07	1.01	-2.58734	7.85102e-54	yes
Os08g0151500	Os08t0151500-00	8	-	2968200	2968516	317	1	Annotated_lncRNA	ncRNA	6.78	6.59	-0.0410068	0.0979705
Os08g0153101	Os08t0153101-00	8	-	3051146	3052511	921	2	Annotated_lncRNA	ncRNA	0	1.95	10.9293	0.00401238	yes
Os08g0153225	Os08t0153225-00	8	-	3063052	3064289	977	2	Annotated_lncRNA	ncRNA	4.78	7.03	0.556514	0.0276685
MSTRG.19480	MSTRG.19480.1	8	+	3117854	3119120	1267	1	Novel_lncRNA	Bidirectional LncRNAs	1.15	1.24	0.108706	0.0102085
Os08g0154650	Os08t0154650-00	8	-	3141961	3142768	505	2	Annotated_lncRNA	ncRNA	0.95	1.22	0.360882	0.0200033
MSTRG.19495	MSTRG.19495.1	8	-	3244907	3245961	1055	1	Novel_lncRNA	Antisense LncRNAs	2.71	0.84	-1.68983	3.74253e-20	yes
Os08g0157550	Os08t0157550-01	8	+	3351441	3353029	1589	1	Annotated_lncRNA	ncRNA	44.53	14.57	-1.61178	0.0115343	yes
Os08g0157850	Os08t0157850-00	8	+	3382633	3386955	2345	5	Annotated_lncRNA	ncRNA	2.75	7.87	1.51693	0.00992658	yes
MSTRG.19514	MSTRG.19514.1	8	+	3430564	3430927	364	1	Novel_lncRNA	Others(sense updown)	1.78	3.97	1.15726	0.670151
Os08g0160700	Os08t0160700-01	8	-	3548596	3549530	935	1	Annotated_lncRNA	ncRNA	0.49	0.41	-0.257158	0.000715862
MSTRG.19547	MSTRG.19547.1	8	+	3832565	3834999	593	2	Novel_lncRNA	Sense LncRNAs	0.9	0.94	0.0627358	0.118924
Os08g0178000	Os08t0178000-01	8	-	4566329	4566665	337	1	Annotated_lncRNA	ncRNA	9.27	8.63	-0.103209	0.0913475
Os08g0178400	Os08t0178400-01	8	-	4592000	4592583	584	1	Annotated_lncRNA	ncRNA	2.8	1.67	-0.745579	0.00788383
MSTRG.19594	MSTRG.19594.1	8	-	4669797	4675969	270	2	Novel_lncRNA	Others(anti down),Others(sense updown)	249.57	1259.2	2.33499	8.01868543200343e-321
Os08g0185701	Os08t0185701-00	8	+	5027574	5029922	426	2	Annotated_lncRNA	ncRNA	16.27	1.96	-3.05329	0.00593419	yes
Os08g0187600	Os08t0187600-00	8	-	5114107	5114622	370	2	Annotated_lncRNA	ncRNA	0.29	2.39	3.04289	0.0674326
Os08g0190901	Os08t0190901-00	8	+	5318774	5320582	398	3	Annotated_lncRNA	ncRNA	2.08	0.44	-2.24101	0.0563489
Os08g0191150	Os08t0191150-00	8	+	5328907	5329776	621	2	Annotated_lncRNA	ncRNA	0.67	0	-9.38802	0.0415138	yes
Os08g0192001	Os08t0192001-00	8	-	5385370	5385976	607	1	Annotated_lncRNA	ncRNA	39.37	23.12	-0.767955	0.00882421
MSTRG.19665	MSTRG.19665.1	8	+	5818202	5818479	278	1	Novel_lncRNA	Intergenic LncRNAs	0	0.27	8.07682	0.539658
MSTRG.19664	MSTRG.19664.1	8	-	5818202	5818483	282	1	Novel_lncRNA	Intergenic LncRNAs	5.18	1.08	-2.26192	1.60329e-13	yes
Os08g0202350	Os08t0202350-00	8	-	5958903	5959364	462	1	Annotated_lncRNA	ncRNA	19.43	30.92	0.670254	0.0292581
Os08g0203325	Os08t0203325-00	8	-	6004271	6004772	502	1	Annotated_lncRNA	ncRNA	1.48	0.6	-1.30256	0.0878593
Os08g0203650	Os08t0203650-00	8	-	6037884	6038369	486	1	Annotated_lncRNA	ncRNA	0.61	0	-9.25267	0.0283942	yes
Os08g0203750	Os08t0203750-00	8	-	6047428	6047963	536	1	Annotated_lncRNA	ncRNA	1.46	1.89	0.372418	0.0379596
MSTRG.19701	MSTRG.19701.2	8	+	6358651	6361177	1068	3	Novel_lncRNA	Sense LncRNAs	1.52	1.68	0.14439	0.00903868
MSTRG.19702	MSTRG.19702.1	8	+	6598294	6603374	924	5	Novel_lncRNA	Sense LncRNAs	4.77	0.32	-3.89785	8.63789e-53	yes
Os08g0224250	Os08t0224250-00	8	+	7559814	7560619	521	3	Annotated_lncRNA	ncRNA	0.15	2.66	4.14839	0.0227041	yes
Os08g0229200	Os08t0229200-01	8	-	7882502	7883098	597	1	Annotated_lncRNA	ncRNA	17.92	8.03	-1.1581	0.00324674	yes
MSTRG.19735	MSTRG.19735.1	8	-	7919616	7922333	2446	2	Novel_lncRNA	Sense LncRNAs	3.93	0.29	-3.7604	9.2865e-115	yes
Os08g0230350	Os08t0230350-00	8	+	7948087	7951633	1021	2	Annotated_lncRNA	ncRNA	0.51	1.63	1.6763	0.0375485	yes
MSTRG.19740	MSTRG.19740.1	8	-	7980811	7988176	1417	3	Novel_lncRNA	Others(lnc(mRNA))	1.97	0.68	-1.53459	1.66191e-18	yes
MSTRG.19740	MSTRG.19740.2	8	-	7980811	7988176	3105	3	Novel_lncRNA	Others(lnc(mRNA))	2.53	0.45	-2.49114	9.77835e-73	yes
Os08g0233000	Os08t0233000-01	8	+	8070577	8070804	228	1	Annotated_lncRNA	ncRNA	2.76	3.15	0.190684	0.00352068
MSTRG.19754	MSTRG.19754.1	8	-	8162176	8162396	221	1	Novel_lncRNA	Others(sense updown)	4.99	2.18	-1.19471	1.22986e-06	yes
MSTRG.19761	MSTRG.19761.1	8	+	8290607	8290837	231	1	Novel_lncRNA	Intergenic LncRNAs	10.95	12.39	0.178245	0.00156068
Os08g0237500	Os08t0237500-00	8	+	8342408	8344154	1101	4	Annotated_lncRNA	ncRNA	2.82	0.19	-3.89162	0.0222	yes
Os08g0238351	Os08t0238351-01	8	-	8405972	8410112	1596	5	Annotated_lncRNA	ncRNA	4.4	6.93	0.655352	0.0853449
MSTRG.19781	MSTRG.19781.1	8	-	8632066	8632702	637	1	Novel_lncRNA	Intergenic LncRNAs	2.39	2.51	0.0706767	0.00616572
Os08g0243001	Os08t0243001-00	8	+	8681711	8683505	839	6	Annotated_lncRNA	ncRNA	0.94	0.4	-1.23266	0.0159408	yes
MSTRG.19786	MSTRG.19786.1	8	+	8703799	8708888	3689	4	Novel_lncRNA	Sense LncRNAs	3.26	0.31	-3.39453	2.38614e-138	yes
Os08g0244625	Os08t0244625-00	8	-	8838319	8839100	495	2	Annotated_lncRNA	ncRNA	4.31	5.84	0.43828	0.00898562
Os08g0251000	Os08t0251000-00	8	+	9232201	9232818	603	3	Annotated_lncRNA	ncRNA	104.91	326.46	1.63775	0.00898562	yes
MSTRG.19819	MSTRG.19819.1	8	+	9242940	9243292	353	1	Novel_lncRNA	Intergenic LncRNAs	105.27	51.87	-1.02112	1.87407e-159	yes
MSTRG.19818	MSTRG.19818.1	8	-	9242940	9243557	618	1	Novel_lncRNA	Intergenic LncRNAs	216.32	603.39	1.47992	1.41306e-65	yes
MSTRG.19803	MSTRG.19803.3	8	-	9245179	9281770	3315	3	Novel_lncRNA	Others(sense updown)	71.31	87.78	0.299788	9.5705e-96
MSTRG.19803	MSTRG.19803.4	8	-	9248500	9284492	1310	2	Novel_lncRNA	Others(sense updown)	787.62	406.44	-0.954457	0
MSTRG.19821	MSTRG.19821.1	8	+	9253588	9281775	1241	2	Novel_lncRNA	Intergenic LncRNAs	33.25	18.55	-0.841935	3.63069e-152
MSTRG.19825	MSTRG.19825.3	8	+	9409810	9414700	3384	2	Novel_lncRNA	Antisense LncRNAs	2.37	0.54	-2.13386	2.71305e-66	yes
MSTRG.19828	MSTRG.19828.1	8	-	9433195	9433986	567	2	Novel_lncRNA	Intergenic LncRNAs	10.53	0	-13.3622	1.0199e-68	yes
MSTRG.19829	MSTRG.19829.1	8	-	9451623	9452424	551	2	Novel_lncRNA	Intergenic LncRNAs	4.65	0	-12.183	1.11529e-29	yes
MSTRG.19830	MSTRG.19830.1	8	-	9458673	9459561	421	2	Novel_lncRNA	Intergenic LncRNAs	1.46	0	-10.5118	1.97272e-07	yes
MSTRG.19832	MSTRG.19832.1	8	-	9489141	9491780	451	2	Novel_lncRNA	Intergenic LncRNAs	1.51	4.94	1.70996	0.0375077	yes
[truncated: 637 more rows]

## Sheet: Table S3
Table S3. Genomic loci and expression pattern of lncRNAs identified from Oryza sativa spp. Indica.
[truncated: 2,366 more rows]

[truncated: 2 more sheets: Table S4, Table S5]
